# Supplementary material for: Benzophenone-catalyzed alkenylative pyridylation of vinylarenes with alkenylboronic esters
Source: Royal Society of Chemistry journal article supplement (doi:10.1039/d5qo01578b), 2026-01-01
Supplement: d5qo01578b1.pdf [file d5qo01578b1.pdf]

# Supporting Information

## **Benzophenone-catalyzed alkenylative pyridylation of vinylarenes with alkenylboronic esters**

Yuhui Ying, Zixiang Li, and Bin Liu\*

School of Chemistry and Chemical Engineering, Nanchang University, Nanchang, Jiangxi 330031, P. R. China.

\*Corresponding author, E-mail: [liubin@ncu.edu.cn](mailto:liubin@ncu.edu.cn)

## Table of Contents

|                                                           |      |
|-----------------------------------------------------------|------|
| Supporting Information .....                              | S1   |
| 1. General Information.....                               | S3   |
| 2. Experimental Equipments.....                           | S4   |
| 3. Synthesis of alkene .....                              | S6   |
| Method A <sup>[1]</sup> .....                             | S6   |
| 4. Optimization Studies .....                             | S10  |
| Table S1 Optimization of Time.....                        | S10  |
| Table S2 Optimization of Solvent.....                     | S10  |
| Table S3 Optimization of Wavelength .....                 | S11  |
| Table S4 Optimization of concentration.....               | S11  |
| Table S5 Optimization of ratio.....                       | S12  |
| Table S6 Control Experiment .....                         | S12  |
| 5. General procedures for alkene difunctionalization..... | S13  |
| General Procedure 1 .....                                 | S13  |
| 6. Proposed mechanism .....                               | S14  |
| 7. Alkylboronic Esters .....                              | S15  |
| 8. Experimental data for isolated products .....          | S16  |
| 9. Mechanistic investigation experimental procedures..... | S44  |
| Radical trapping experiment.....                          | S44  |
| 10. Gram-Scale reaction .....                             | S45  |
| 11. NMR Spectra of Substrates and Products.....           | S46  |
| 12. Reference .....                                       | S106 |

## 1. General Information

All air and water-sensitive reactions were carried out in oven-dried glassware under nitrogen atmosphere using standard Schlenk manifold technique. Commercially available compounds and solvents were purchased from Leyan, Adamas-beta, Bidepharm and used as received. All reactions were followed by thin-layer chromatography (TLC) and visualized under UV light. If the reaction product is not fluorescent under UV light, it is placed in an iodine bath for 5 minutes before observation. Flash column chromatography (FCC) was carried out using silica gel (200 – 300 mesh).  $^1\text{H}$  NMR,  $^{13}\text{C}$  NMR,  $^{19}\text{F}$  NMR, spectra were recorded on an Agilent 400MR DD2 (400 MHz) or AVANCE III HD (400MHz) spectrometer. Chemical shifts ( $\delta$ ) are reported in parts per million (ppm) relative to incompletely deuterated  $\text{CDCl}_3$  (s, 7.26 ppm).  $^{13}\text{C}$  NMR data was acquired on an Agilent 400MR DD2 (101 MHz) or AVANCE III HD (101 MHz) spectrometer.  $^{19}\text{F}$  NMR data was acquired on an Agilent 400MR DD2 (376 MHz) spectrum Multiplicity was indicated as follows: s (singlet), d (doublet), t (triplet), q (quartet), m (multiplet), dd (doublet of doublet), q (quartet). HRMS ESI measurements were tested by an Agilent 1260HpLC-6545Q-TOF LC-MS. The microanalyte was dissolved in chromatography-grade methanol before the test. High resolution mass values are given in m/z.

## 2. Experimental Equipments

We used the RLH-18-bit photoreaction system, which was produced by Beijing Rogertech Ltd. The photoreactor has eight same 10 W LEDs. This blue light 10 W LEDs energy peak wavelength is 395 nm, 12.6 nm in half-height, and the irradiance of sample position is 18.78 mW./cm<sup>2</sup>. The irradiation vessel is a borosilicate glass test tube, and the LED reaches the test tube through a high-reflection channel with a path length of 2 cm. There is no filter between the LED and the test tube. The spectra are as follows:

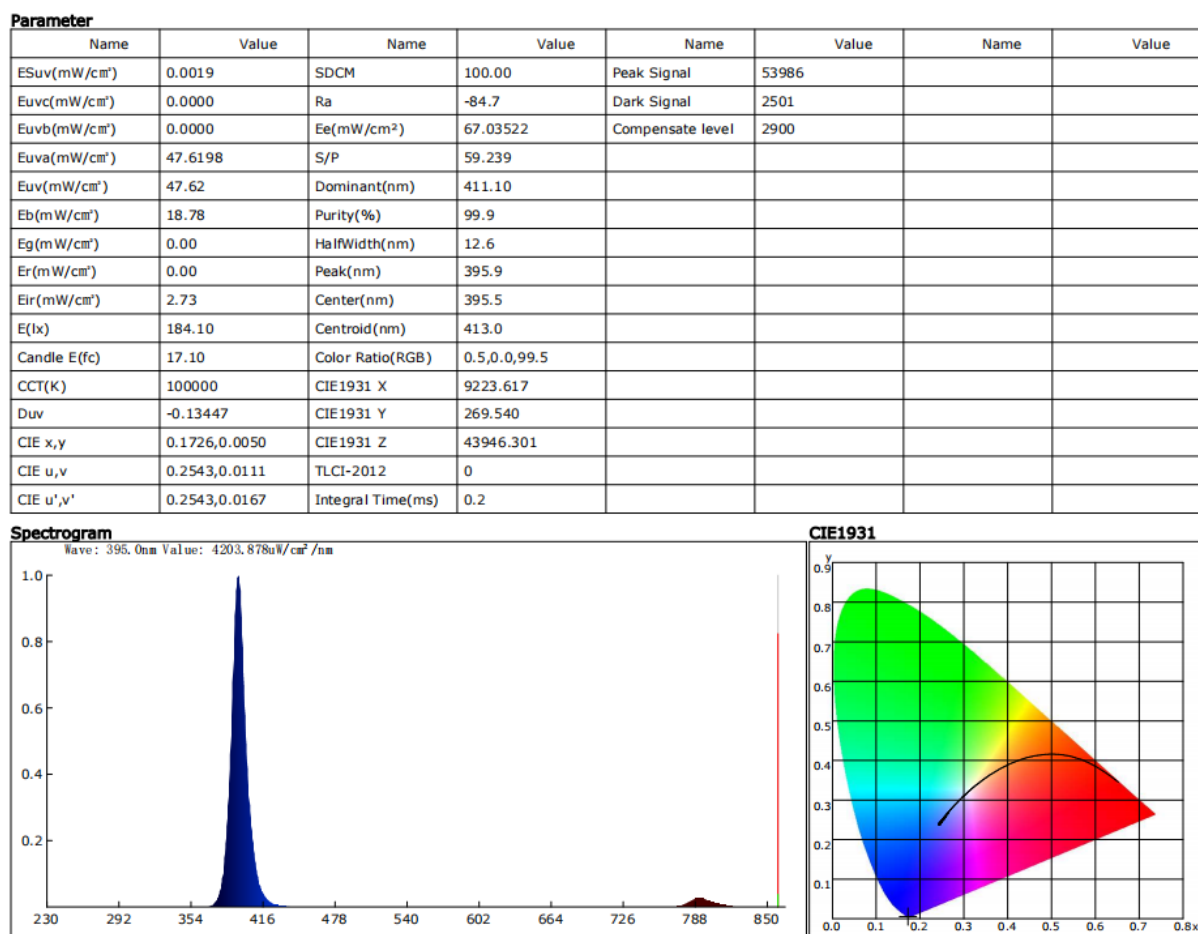

Figure S1 Light Source Test Report

The main experimental equipment during the reaction is the photoreactor and magnetic stirrer, as shown in the figure below :

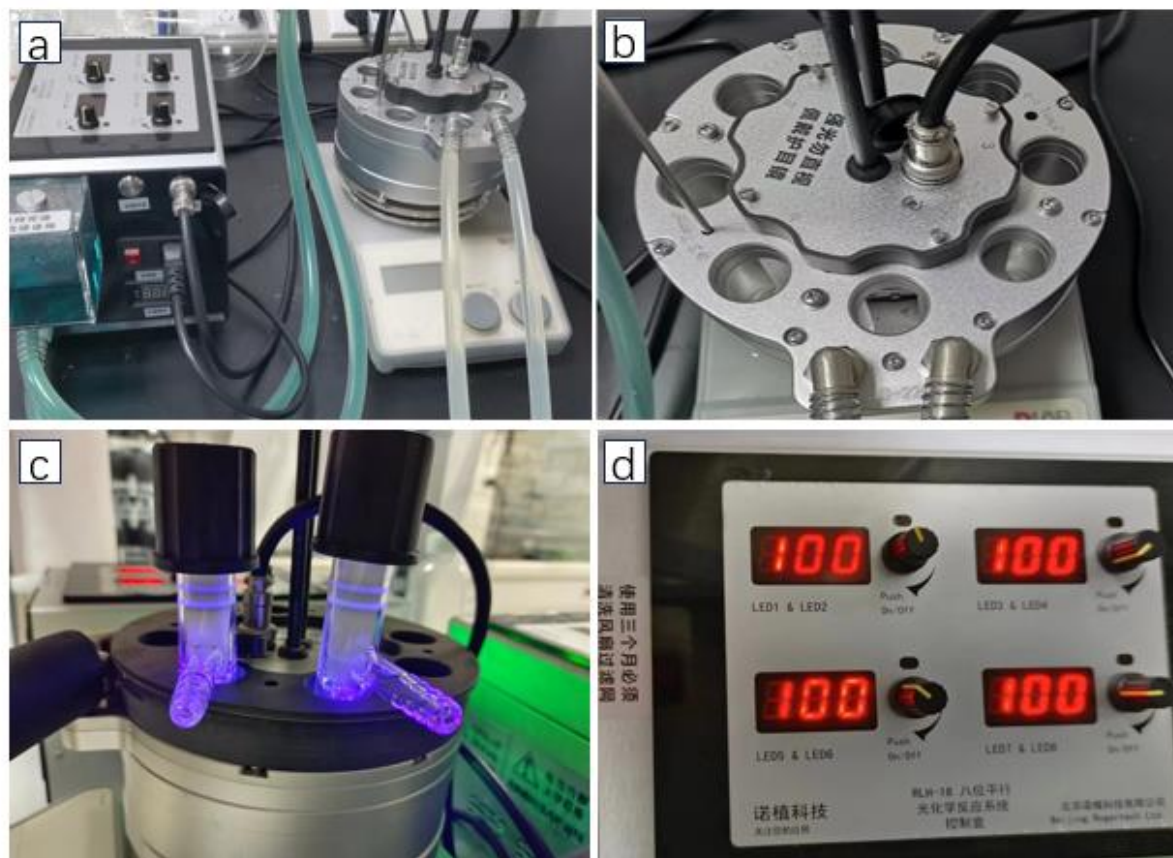

Figure S2 a). General view of photoreactor and agitator; b). Top view of reaction tube module; c). Operation status of the reaction tube module; d). Control switch

### 3. Synthesis of alkene

#### Method A<sup>[1]</sup>

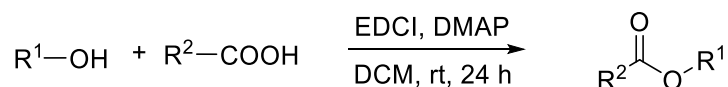

To a stirred solution of carboxylic acid (2 mmol, 1 equiv.) and EDCI (1.15 g, 6 mmol, 3 equiv.) in DCM (8 mL) were added DMAP (4–dimethylaminepyridine) (0.29 g, 2.4 mmol, 1.2 equiv.) and alcohol (2 mmol, 1 equiv.). The reaction mixture was stirred at room temperature for 24 h. After completion of the reaction (TLC), the reaction was quenched with water and the mixture was extracted with EtOAc. The combined organic layer dried over Na<sub>2</sub>SO<sub>4</sub>. After filtration, the filtrate was concentrated in vacuo and the residue was purified by flash column chromatography afford the product.

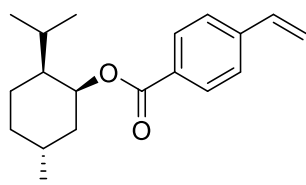

**S1**

Synthesized according to Method A. To a stirred solution of 4–vinylbenzoic acid (0.3 g, 2.0 mmol, 1.0 equiv.) and EDCI (1.15 g, 6 mmol, 3.0 equiv.) in DCM (8 mL) were added DMAP (4–dimethylaminepyridine) (0.29 g, 2.4 mmol, 1.2 equiv.) and Menthol (0.31 g, 2.0 mmol, 1.0 equiv.). Purification by flash column chromatography (SiO<sub>2</sub>, PE: EA = 10:1) afford **S1** (0.49 g, 85%) as a colorless liquid.

**TLC:** (SiO<sub>2</sub>): R<sub>f</sub> (PE: EA = 10: 1) = 0.5

**<sup>1</sup>H NMR** (400 MHz, CDCl<sub>3</sub>) δ 7.93 (d, *J* = 8.5 Hz, 2H), 7.38 (d, *J* = 8.4 Hz, 2H), 6.67 (dd, *J* = 17.6, 10.9 Hz, 1H), 5.78 (d, *J* = 17.5 Hz, 1H), 5.29 (d, *J* = 11.0 Hz, 1H), 4.85 (td, *J* = 10.9, 4.4 Hz, 1H), 2.05 (d, *J* = 10.5 Hz, 1H), 1.92 – 1.84 (m, 1H), 1.65 (d, *J* = 11.6 Hz, 2H) 1.51 – 1.44 (m, 2H), 1.08 – 0.97 (m, 2H), 0.84 (dd, *J* = 6.8, 4.5 Hz, 7H), 0.71 (d, *J* = 6.9 Hz, 3H).

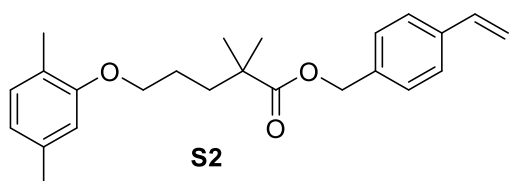

**S2**

Synthesized according to Method A. Synthesized according to Method A. To a stirred solution of (4-vinylphenyl) methanol (0.27 g, 2.0 mmol, 1.0 equiv.) and EDCI (1.15 g, 6 mmol, 3.0 equiv.) in DCM (8 mL) were added DMAP (4-dimethylaminepyridine) (0.29 g, 2.4 mmol, 1.2 equiv.) and Gemfibrozil (0.31 g, 2.0 mmol, 1.0 equiv.). Purification by flash column chromatography (SiO<sub>2</sub>, PE: EA = 10:1) afford **S2** (0.61 g, 71%) as a colorless liquid.

**TLC:** (SiO<sub>2</sub>): R<sub>f</sub> (PE: EA = 10: 1) = 0.5

**<sup>1</sup>H NMR** (400 MHz, CDCl<sub>3</sub>)  $\delta$  7.31 (d,  $J$  = 8.3 Hz, 2H), 7.22 (d,  $J$  = 8.4 Hz, 2H), 6.92 (d,  $J$  = 7.4 Hz, 1H), 6.67 – 6.61 (m, 1H), 6.58 (d,  $J$  = 8.5 Hz, 1H), 6.51 (d,  $J$  = 1.8 Hz, 1H), 5.67 (d,  $J$  = 17.6 Hz, 1H), 5.18 (d,  $J$  = 10.9 Hz, 1H), 5.02 (s, 2H), 3.83 – 3.77 (m, 2H), 2.23 (s, 3H), 2.08 (s, 3H), 1.65 (dd,  $J$  = 3.4, 1.9 Hz, 4H), 1.17 (s, 6H).

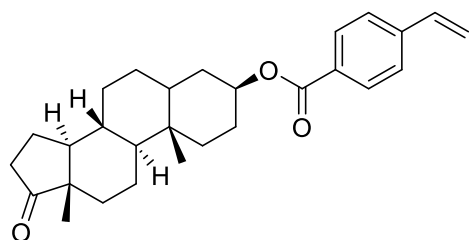

**S3**

Synthesized according to Method A. Synthesized according to Method A. To a stirred solution of 4-vinylbenzoic acid (0.3 g, 2.0 mmol, 1.0 equiv.) and EDCI (1.15 g, 6 mmol, 3.0 equiv.) in DCM (8 mL) were added DMAP (4-dimethylaminepyridine) (0.29 g, 2.4 mmol, 1.2 equiv.) and Epiandrosterone (0.58 g, 2.0 mmol, 1.0 equiv.). Purification by flash column chromatography (SiO<sub>2</sub>, PE: EA = 5:1) afford **S3** (0.59 g, 70%) as a white solid.

**TLC:** (SiO<sub>2</sub>): R<sub>f</sub> (PE: EA = 5: 1) = 0.6

**<sup>1</sup>H NMR** (400 MHz, CDCl<sub>3</sub>)  $\delta$  7.91 (d,  $J$  = 8.4 Hz, 2H), 7.38 (d,  $J$  = 8.4 Hz, 2H), 6.67 (dd,  $J$  = 17.6, 10.9 Hz, 1H), 5.78 (d,  $J$  = 17.6 Hz, 1H), 5.30 (d,  $J$  = 10.9 Hz, 1H), 4.91 – 4.81 (m, 1H), 2.37 (dd,  $J$  = 19.3, 8.8 Hz, 1H), 2.00 (dt,  $J$  = 19.0, 9.0 Hz, 1H), 1.93 – 1.82 (m, 2H), 1.76 – 1.66 (m, 4H), 1.64 – 1.52 (m, 2H), 1.52 – 1.37 (m, 3H), 1.32 – 1.16 (m, 6H), 1.08 – 0.86 (m, 2H), 0.82 (s, 3H), 0.79 (s, 3H), 0.72 – 0.63 (m, 1H).

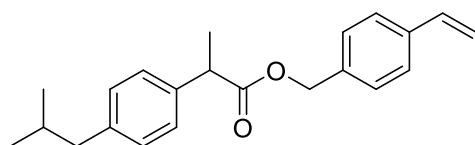

**S4**

Synthesized according to Method A. Synthesized according to Method A. To a stirred solution of (4-vinylphenyl) methanol (0.27 g, 2.0 mmol, 1.0 equiv.) and EDCI (1.15 g, 6 mmol, 3.0 equiv.) in DCM (8 mL) were added DMAP (4-dimethylaminepyridine) (0.29 g, 2.4 mmol, 1.2 equiv.) and Ibuprofen (0.41 g, 2.0 mmol, 1.0 equiv.). Purification by flash column chromatography (SiO<sub>2</sub>, PE: EA = 10:1) afford **S4** (0.59 g, 91%) as a white solid.

**TLC:** (SiO<sub>2</sub>): R<sub>f</sub> (PE: EA= 10: 1) = 0.5

**<sup>1</sup>H NMR** (400 MHz, CDCl<sub>3</sub>) δ 7.35 (d, *J* = 8.0 Hz, 2H), 7.21 (t, *J* = 8.8 Hz, 4H), 7.11 (d, *J* = 7.9 Hz, 2H), 6.71 (dd, *J* = 17.6, 10.9 Hz, 1H), 5.75 (d, *J* = 17.6 Hz, 1H), 5.30 – 5.23 (m, 1H), 5.10 (s, 2H), 3.77 (q, *J* = 7.2 Hz, 1H), 2.47 (d, *J* = 7.2 Hz, 2H), 1.87 (dt, *J* = 13.5, 6.7 Hz, 1H), 1.53 (d, *J* = 7.2 Hz, 3H), 0.93 (d, *J* = 6.7 Hz, 6H).

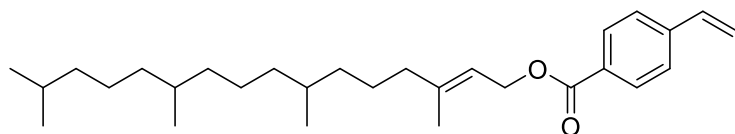

**S5**

Synthesized according to Method A. Synthesized according to Method A. To a stirred solution of 4-vinylbenzoic acid (0.3 g, 2.0 mmol, 1.0 equiv.) and EDCI (1.15 g, 6 mmol, 3.0 equiv.) in DCM (8 mL) were added DMAP (4-dimethylaminepyridine) (0.29 g, 2.4 mmol, 1.2 equiv.) and phytol (0.98 g, 2.0 mmol, 1.0 equiv.). Purification by flash column chromatography (SiO<sub>2</sub>, PE: EA = 10:1) afford **S5** (0.68 g, 80%) as a colorless liquid.

**TLC:** (SiO<sub>2</sub>): R<sub>f</sub> (PE: EA= 10: 1) = 0.4

**<sup>1</sup>H NMR** (400 MHz, CDCl<sub>3</sub>) δ 7.93 (d, *J* = 8.4 Hz, 2H), 7.37 (d, *J* = 8.4 Hz, 2H), 6.67 (dd, *J* = 17.6, 10.9 Hz, 1H), 5.78 (d, *J* = 17.6 Hz, 1H), 5.38 (t, *J* = 7.1 Hz, 1H), 5.29 (d, *J* = 10.9 Hz, 1H), 4.76 (d, *J* = 7.1 Hz, 2H), 1.96 (t, *J* = 8.1 Hz, 2H), 1.67 (s, 3H), 1.50 – 1.42 (m, 1H), 1.38 – 1.26 (m, 4H), 1.25 – 1.12 (m, 7H), 1.09 – 1.03 (m, 2H), 1.03 – 0.90 (m, 4H), 0.82 – 0.73 (m, 13H).



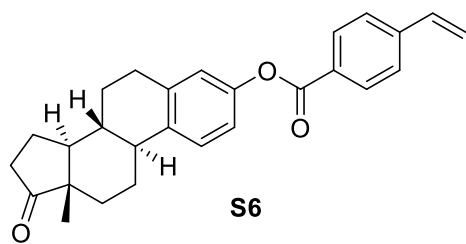

Synthesized according to Method A. To a stirred solution of 4-vinylbenzoic acid (0.3 g, 2.0 mmol, 1.0 equiv.) and EDCI (1.15 g, 6 mmol, 3.0 equiv.) in DCM (8 mL) were added DMAP (4-dimethylaminepyridine) (0.29 g, 2.4 mmol, 1.2 equiv.) and Estrone (0.98 g, 2.0 mmol, 1.0 equiv.) Purification by flash column chromatography (SiO<sub>2</sub>, PE: EA = 5: 1) afford **S6** (0.6 g, 75%) as a white solid.

**TLC:** (SiO<sub>2</sub>): R<sub>f</sub> (PE: EA= 5: 1) = 0.5

**<sup>1</sup>H NMR** (400 MHz, CDCl<sub>3</sub>) δ 8.15 (d, *J* = 8.5 Hz, 2H), 7.53 (d, *J* = 8.4 Hz, 2H), 7.34 (d, *J* = 8.5 Hz, 1H), 7.01 – 6.94 (m, 2H), 6.79 (dd, *J* = 17.6, 11.0 Hz, 1H), 5.91 (d, *J* = 18.3 Hz, 1H), 5.43 (d, *J* = 11.5 Hz, 1H), 2.95 (dd, *J* = 8.6, 3.9 Hz, 2H), 2.52 (dd, *J* = 18.9, 8.3 Hz, 1H), 2.48 – 2.40 (m, 1H), 2.39 – 2.27 (m, 1H), 2.21 – 2.10 (m, 1H), 2.09 – 2.00 (m, 2H), 2.00 – 1.95 (m, 1H), 1.71 – 1.59 (m, 2H), 1.58 – 1.49 (m, 3H), 1.49 – 1.41 (m, 1H), 0.93 (s, 3H).

## 4. Optimization Studies

**Table S1 Optimization of Time**

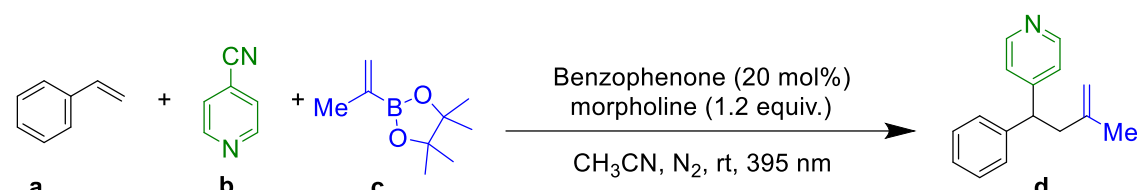

Reaction scheme showing the reaction of **a** (styrene), **b** (4-cyanopyridine), and **c** (pinacol boronate ester) with Benzophenone (20 mol%) and morpholine (1.2 equiv.) in CH<sub>3</sub>CN, N<sub>2</sub>, rt, 395 nm to form product **d**.

| Entry | Time (h) | Yield (%) |
|-------|----------|-----------|
| 1     | 12       | 71        |
| 2     | 24       | 56        |
| 3     | 36       | 57        |

Reaction conditions: 0.2 mmol scale, **a** (2.0 equiv.), **b** (1.0 equiv.), **c** (1.0 equiv.), Benzophenone (20 mol%), morpholine (1.2 equiv.), CH<sub>3</sub>CN (4 mL), 395 nm blue LEDs, room temperature, under a nitrogen atmosphere. isolated yield.

**Table S2 Optimization of Solvent**

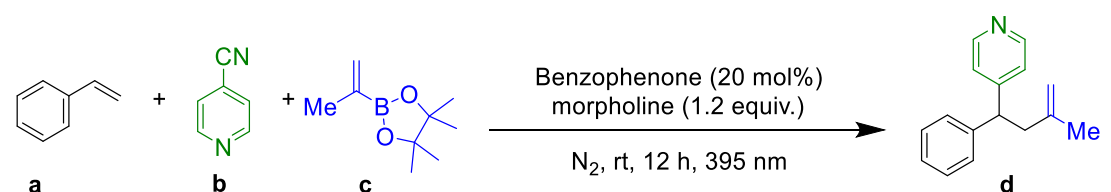

Reaction scheme showing the reaction of **a** (styrene), **b** (4-cyanopyridine), and **c** (pinacol boronate ester) with Benzophenone (20 mol%) and morpholine (1.2 equiv.) in N<sub>2</sub>, rt, 12 h, 395 nm to form product **d**.

| Entry | Solvent            | Yield (%) |
|-------|--------------------|-----------|
| 1     | BTF                | 33        |
| 2     | CH <sub>3</sub> CN | 71        |
| 3     | Toluene            | 20        |
| 4     | DMSO               | 68        |
| 5     | DMA                | 25        |
| 6     | DMF                | 34        |

Reaction conditions: 0.2 mmol scale, **a** (2.0 equiv.), **b** (1.0 equiv.), **c** (1.0 equiv.), Benzophenone (20 mol%), morpholine (1.2 equiv.), solvent (4 mL), 12 h, 395 nm blue LEDs, room temperature, under a nitrogen atmosphere. isolated yield.

**Table S3 Optimization of Wavelength**
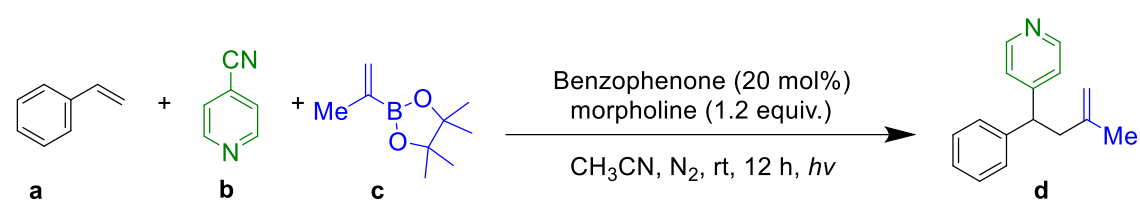

| Entry | Wavelength (nm) | Yield (%) |
|-------|-----------------|-----------|
| 1     | 365             | 61        |
| 2     | 395             | 71        |
| 3     | 425             | n.d.      |

Reaction conditions: 0.2 mmol scale, **a** (2.0 equiv.), **b** (1.0 equiv.), **c** (1.0 equiv.), Benzophenone (20 mol%), morpholine (1.2 equiv.), CH<sub>3</sub>CN (4 mL), 12 h, 395 nm blue LEDs, room temperature, under a nitrogen atmosphere. isolated yield.

**Table S4 Optimization of concentration**
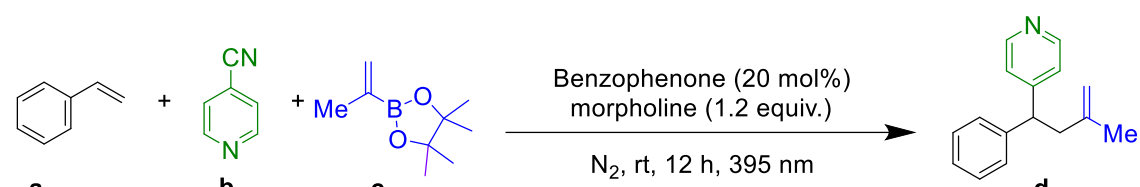

| Entry | CH <sub>3</sub> CN (mL) | Yield (%) |
|-------|-------------------------|-----------|
| 1     | 1                       | 59        |
| 2     | 2                       | 63        |
| 4     | 4                       | 71        |
| 8     | 8                       | 52        |

Reaction conditions: 0.2 mmol scale, **a** (2.0 equiv.), **b** (1.0 equiv.), **c** (1.0 equiv.), Benzophenone (20 mol%), morpholine (1.2 equiv.), CH<sub>3</sub>CN, 12 h, 395 nm blue LEDs, room temperature, under a nitrogen atmosphere. isolated yield.

**Table S5 Optimization of ratio**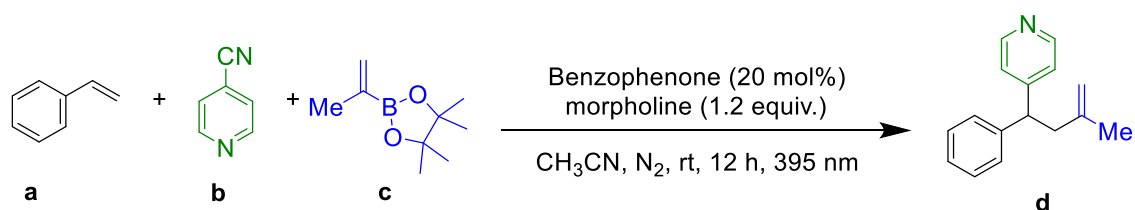

| Entry | Deviation from the standard conditions  | Yield (%) |
|-------|-----------------------------------------|-----------|
| 1     | 1.0 equiv <b>a</b> ; 2.0 equiv <b>c</b> | 52        |
| 2     | 1.0 equiv <b>a</b> ; 2.0 equiv <b>b</b> | 38        |
| 3     | 1.0 equiv <b>a</b>                      | 38        |
| 4     | 2.0 equiv <b>a</b>                      | 71        |
| 5     | 4.0 equiv <b>a</b>                      | 72        |
| 6     | 0.6 equiv morpholine                    | 43        |
| 7     | 1.8 equiv morpholine                    | 56        |

Reaction conditions: 0.2 mmol scale, **a** (2.0 equiv.), **b** (1.0 equiv.), **c** (1.0 equiv.), Benzophenone (20 mol%), morpholine (1.2 equiv.),  $\text{CH}_3\text{CN}$  (4 mL), 12 h, 395 nm blue LEDs, room temperature, under a nitrogen atmosphere. isolated yield.

**Table S6 Control Experiment**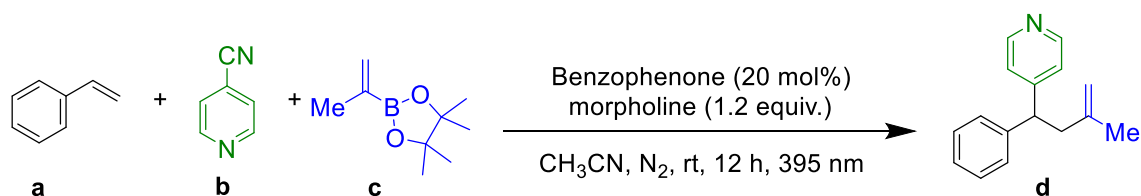

| Entry | Variation from the standard conditions | Yield (%) |
|-------|----------------------------------------|-----------|
| 1     | None                                   | 71        |
| 2     | Without BP                             | n.d.      |
| 3     | Without light                          | n.d.      |
| 4     | Without morpholine                     | n.d.      |

Reaction conditions: 0.2 mmol scale, **a** (2.0 equiv.), **b** (1.0 equiv.), **c** (1.0 equiv.), Benzophenone (20 mol%), morpholine (1.2 equiv.),  $\text{CH}_3\text{CN}$  (4 mL), 395 nm blue LEDs, room temperature, 12 h, under a nitrogen atmosphere. isolated yield.

## 5. General procedures for alkene difunctionalization

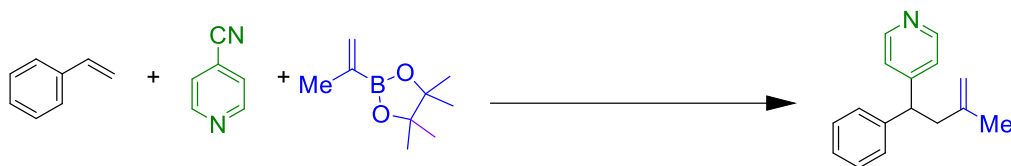

### General Procedure 1

A 10 mL Schlenk tube was equipped with a magnetic stir bar and dried using a heat gun. The Schlenk tube was then charged with 4-cyanopyridine (0.2 mmol, 1.0 equiv), Benzophenone (20 mol%). The reaction mixture was evacuated and purged with nitrogen gas three times. Styrene (0.4 mmol, 2.0 equiv.), BPin (0.2 mmol, 1.0 equiv.), morpholine (0.24 mmol, 1.2 equiv.) and CH<sub>3</sub>CN (4 mL) were added under a nitrogen atmosphere. The reaction was irradiated with 10 W 395 nm blue LEDs at room temperature. After 12 hours, the reaction mixture was concentrated under vacuum. The crude product was purified by flash chromatography on silica gel using the specified solvent system to yield the desired product.

## 6. Proposed mechanism

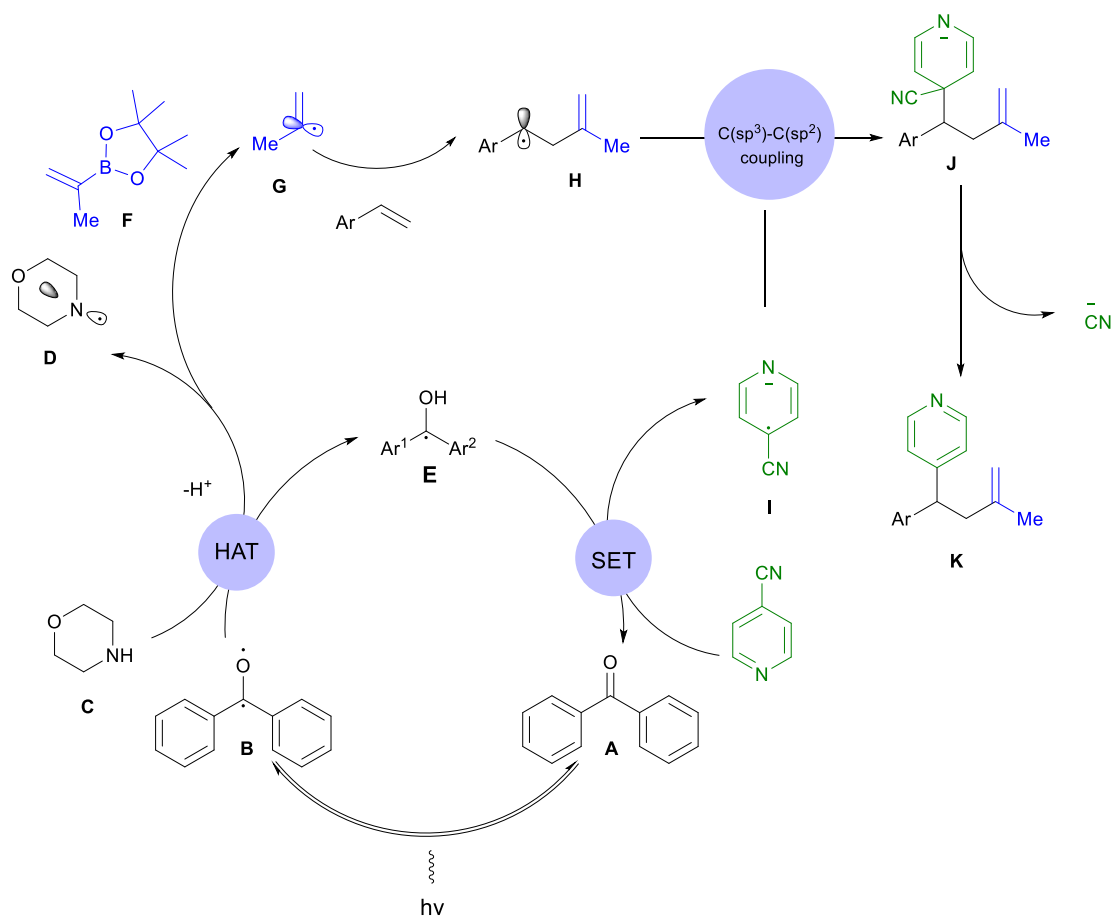

Figure S3 Proposed mechanism

## 7. Alkylboronic Esters

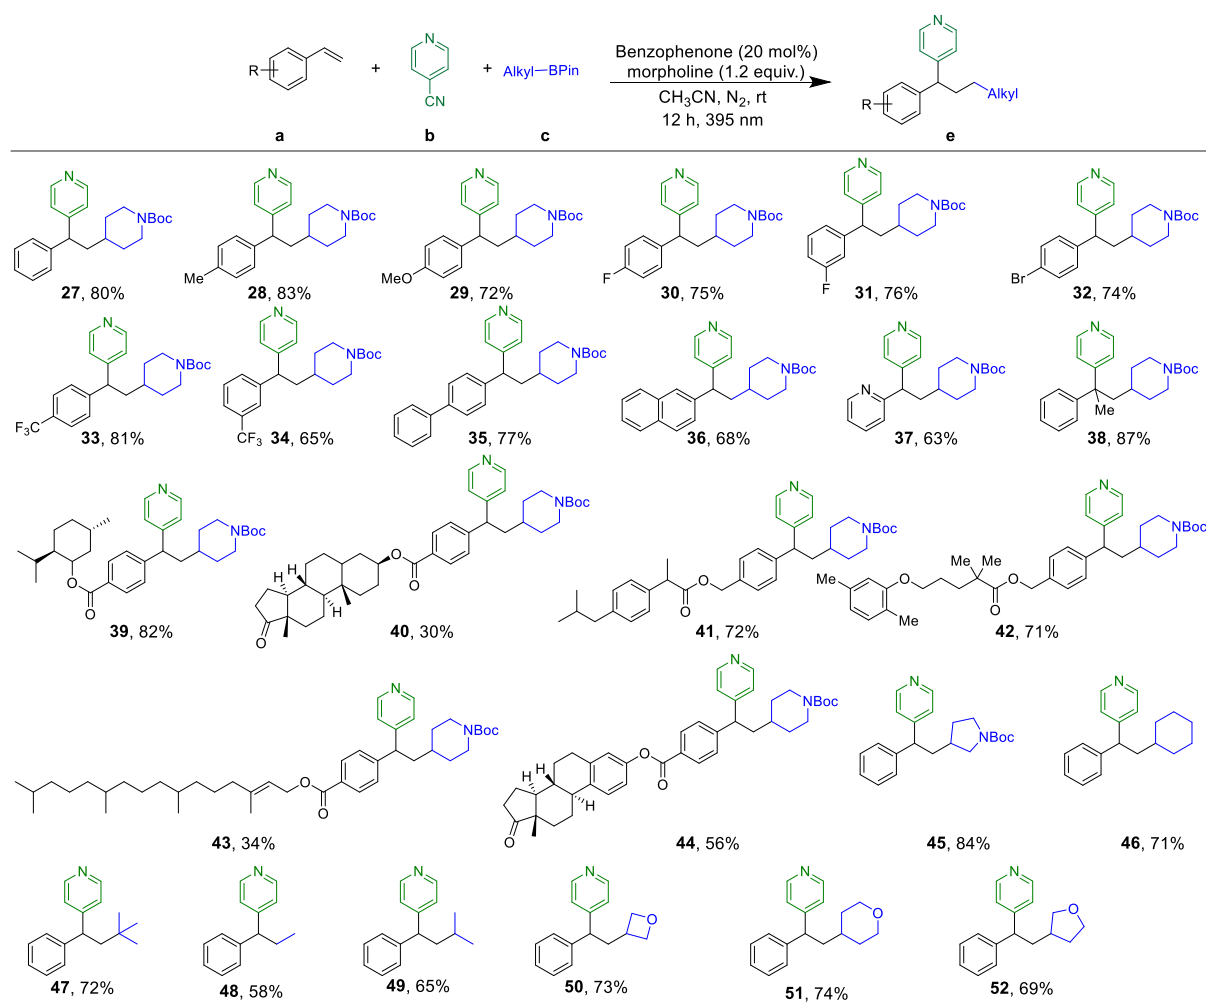

Figure S4. Substrate scope. Reaction conditions: 0.2 mmol scale, compound **a** (2.0 equiv.), compound **b** (1.0 equiv.), compound **c** (1.0 equiv.), Benzophenone (20 mol%), morpholine (1.2 equiv.) in CH<sub>3</sub>CN (0.05 M), 395 nm blue LEDs, room temperature, 12 h, under a nitrogen atmosphere. isolated yield.

## 8. Experimental data for isolated products

### 4-(3-methyl-1-phenylbut-3-en-1-yl) pyridine (1)

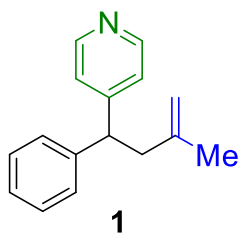

According to the general procedure 1, the product was isolated by flash chromatography (PE: EA = 4:1) as a colorless oil in 31.5 mg, 71% yield.

**TLC:** (SiO<sub>2</sub>): R<sub>f</sub> (PE: EA= 4: 1) = 0.4

**<sup>1</sup>H NMR** (400 MHz, CDCl<sub>3</sub>) δ 8.40 (d, *J* = 6.3 Hz, 2H), 7.24 – 7.18 (m, 2H), 7.16 – 7.11 (m, 3H), 7.08 (d, *J* = 6.1 Hz, 2H), 4.58 (d, *J* = 48.5 Hz, 2H), 4.08 (t, *J* = 7.9 Hz, 1H), 2.69 (d, *J* = 7.9 Hz, 2H), 1.62 (s, 3H).

**<sup>13</sup>C NMR** (101 MHz, CDCl<sub>3</sub>) δ 153.6, 149.7, 142.8, 142.4, 128.7, 127.9, 126.8, 123.4, 113.2, 48.7, 43.1, 22.5.

**HRMS (ESI):** C<sub>16</sub>H<sub>17</sub>NH<sup>+</sup> [M+H]<sup>+</sup> Calcd 224.1434, Found 224.1439.

### 4-(3-methyl-1-(p-tolyl) but-3-en-1-yl) pyridine (2)

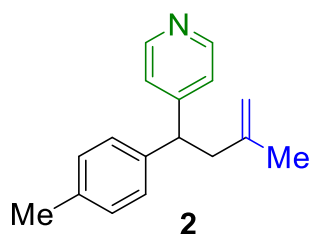

According to the general procedure 1, the product was isolated by flash chromatography (PE: EA = 4:1) as a colorless oil in 30.2 mg, 64% yield.

**TLC:** (SiO<sub>2</sub>): R<sub>f</sub> (PE: EA= 4: 1) = 0.4

**<sup>1</sup>H NMR** (400 MHz, CDCl<sub>3</sub>) δ 8.39 (d, *J* = 6.3 Hz, 2H), 7.07 (d, *J* = 6.3 Hz, 2H), 7.03 (s, 4H), 4.58 (d, *J* = 46.3 Hz, 2H), 4.04 (t, *J* = 7.9 Hz, 1H), 2.67 (d, *J* = 7.9 Hz, 2H), 2.23 (s, 3H), 1.62 (s, 3H).

**<sup>13</sup>C NMR** (101 MHz, CDCl<sub>3</sub>) δ 154.0, 149.6, 142.5, 139.8, 136.4, 129.4, 127.7, 123.3, 113.2, 48.3, 43.2, 22.5, 21.0.

**HRMS (ESI):** C<sub>17</sub>H<sub>19</sub>NH<sup>+</sup> [M+H]<sup>+</sup> Calcd 238.1590, Found 238.1600.



#### 4-(3-methyl-1-(m-tolyl) but-3-en-1-yl) pyridine (3)

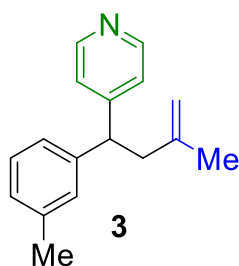

According to the general procedure 1, the product was isolated by flash chromatography (PE: EA = 4:1) as a colorless oil in 27.9 mg, 59% yield.

**TLC:** (SiO<sub>2</sub>): R<sub>f</sub> (PE: EA= 4: 1) = 0.4

**<sup>1</sup>H NMR** (400 MHz, CDCl<sub>3</sub>) δ 8.40 (d, *J* = 6.1 Hz, 2H), 7.10 – 7.08 (m, 3H), 6.96 (s, 1H), 6.94 (s, 2H), 4.64 (s, 1H), 4.51 (s, 1H), 4.04 (t, *J* = 7.9 Hz, 1H), 2.68 (d, *J* = 8.0 Hz, 2H), 2.24 (s, 3H), 1.62 (s, 3H).

**<sup>13</sup>C NMR** (101 MHz, CDCl<sub>3</sub>) δ 153.8, 149.6, 142.8, 142.5, 138.3, 128.7, 128.5, 127.6, 124.8, 123.4, 113.2, 48.6, 43.1, 22.6, 21.5.

**HRMS (ESI):** C<sub>17</sub>H<sub>19</sub>NH<sup>+</sup> [M+H]<sup>+</sup> Calcd 238.1590, Found 238.1601

#### 4-(1-(4-methoxyphenyl)-3-methylbut-3-en-1-yl) pyridine (4)

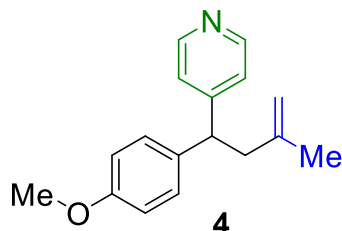

According to the general procedure 1, the product was isolated by flash chromatography (PE: EA = 4:1) as a colorless oil in 24 mg, 47% yield.

**TLC:** (SiO<sub>2</sub>): R<sub>f</sub> (PE: EA= 4: 1) = 0.4

**<sup>1</sup>H NMR** (400 MHz, CDCl<sub>3</sub>) δ 8.40 (d, *J* = 6.3 Hz, 2H), 7.11 – 7.01 (m, 4H), 6.78 – 6.74 (m, 2H), 4.57 (d, *J* = 50.5 Hz, 2H), 4.03 (t, *J* = 7.9 Hz, 1H), 3.69 (s, 3H), 2.66 (d, *J* = 7.4 Hz, 2H), 1.61 (s, 3H).

**<sup>13</sup>C NMR** (101 MHz, CDCl<sub>3</sub>) δ 158.3, 154.4, 149.4, 142.5, 134.8, 128.9, 123.3, 114.0, 113.2, 55.2, 47.8, 43.3, 22.5.

**HRMS (ESI):** C<sub>17</sub>H<sub>19</sub>NOH<sup>+</sup> [M+H]<sup>+</sup> Calcd 254.1539, Found 254.1549.

#### 4-(1-(4-fluorophenyl)-3-methylbut-3-en-1-yl) pyridine (5)

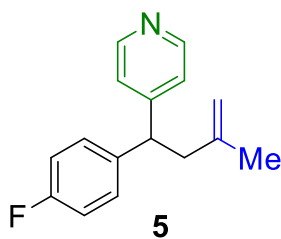

According to the general procedure 1, the product was isolated by flash chromatography (PE: EA = 4:1) as a colorless oil in 31.0 mg, 64% yield.

**TLC:** (SiO<sub>2</sub>): R<sub>f</sub> (PE: EA= 4: 1) = 0.4

**<sup>1</sup>H NMR** (400 MHz, CDCl<sub>3</sub>) δ 8.43 (d, *J* = 6.1 Hz, 2H), 7.12 – 7.06 (m, 4H), 6.94 – 6.89 (m, 8.7 Hz, 2H), 4.58 (d, *J* = 58.4 Hz, 2H), 4.08 (t, *J* = 7.9 Hz, 1H), 2.67 (d, *J* = 7.9 Hz, 2H), 1.62 (s, 3H).

**<sup>13</sup>C NMR** (101 MHz, CDCl<sub>3</sub>) δ 162.9, 160.4, 154.2, 149.2, 142.0, 138.2 (d, *J* = 3.3 Hz), 129.4 (d, *J* = 8.0 Hz), 123.4, 115.5 (d, *J* = 21.4 Hz), 113.5, 47.9, 43.3, 22.5.

**HRMS (ESI):** C<sub>16</sub>H<sub>16</sub>FNH<sup>+</sup> [M+H]<sup>+</sup> Calcd 242.1340, Found 242.1332.

**<sup>19</sup>F NMR** (376 MHz, CDCl<sub>3</sub>) δ -115.84.

#### 4-(1-(3-fluorophenyl)-3-methylbut-3-en-1-yl) pyridine (6)

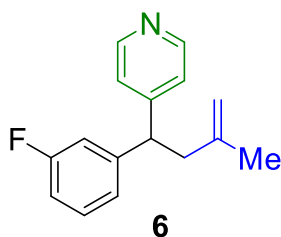

According to the general procedure 1, the product was isolated by flash chromatography (PE: EA = 4:1) as a colorless oil in 28.0 mg, 58% yield.

**TLC:** (SiO<sub>2</sub>): R<sub>f</sub> (PE: EA= 4: 1) = 0.4

**<sup>1</sup>H NMR** (400 MHz, CDCl<sub>3</sub>) δ 8.43 (d, *J* = 5.6 Hz, 2H), 7.21 – 7.15 (m, 1H), 7.07 (d, *J* = 6.3 Hz, 2H), 6.92 (d, *J* = 7.9 Hz, 1H), 6.87 – 6.80 (m, 2H), 4.58 (d, *J* = 55.5 Hz, 2H), 4.08 (t, *J* = 7.9 Hz, 1H), 2.67 (d, *J* = 7.9 Hz, 2H), 1.62 (s, 3H).

**<sup>13</sup>C NMR** (101 MHz, CDCl<sub>3</sub>) δ 164.1, 161.7, 153.0, 149.7, 145.3 (d, *J* = 6.9 Hz), 141.9, 130.1 (d, *J* = 8.4 Hz), 123.7 (d, *J* = 2.5 Hz), 114.8 (d, *J* = 21.8 Hz), 113.7 (d, *J* = 21.1 Hz), 113.5, 48.3 (d, *J* = 1.8 Hz), 43.0, 22.5.

**<sup>19</sup>F NMR** (376 MHz, CDCl<sub>3</sub>) δ -112.69.

**HRMS (ESI):** C<sub>16</sub>H<sub>16</sub>FNH<sup>+</sup> [M+H]<sup>+</sup> Calcd 242.1340, Found 242.1345.

#### 4-(1-(4-chlorophenyl)-3-methylbut-3-en-1-yl) pyridine (7)

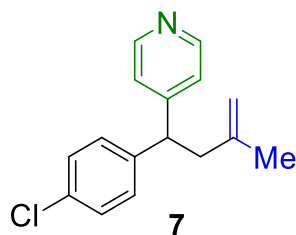

According to the general procedure 1, the product was isolated by flash chromatography (PE: EA = 4:1) as a colorless oil in 28.3 mg, 55% yield.

**TLC:** (SiO<sub>2</sub>): R<sub>f</sub> (PE: EA= 4: 1) = 0.4

**<sup>1</sup>H NMR** (400 MHz, CDCl<sub>3</sub>) δ 8.42 (d, *J* = 6.0 Hz, 2H), 7.21 – 7.18 (m, 2H), 7.09 – 7.04 (m, 4H), 4.58 (d, *J* = 58.2 Hz, 2H), 4.06 (t, *J* = 7.9 Hz, 1H), 2.66 (d, *J* = 8.0 Hz, 2H), 1.62 (s, 3H).

**<sup>13</sup>C NMR** (101 MHz, CDCl<sub>3</sub>) δ 153.2, 149.8, 142.0, 141.2, 132.6, 129.3, 128.8, 123.2, 113.5, 48.0, 43.1, 22.5.

**HRMS (ESI):** C<sub>16</sub>H<sub>16</sub>ClNH<sup>+</sup> [M+H]<sup>+</sup> Calcd 258.1044, Found 258.1048.

#### 4-(1-(4-bromophenyl)-3-methylbut-3-en-1-yl) pyridine (8)

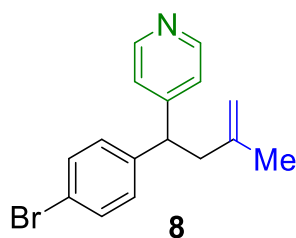

According to the general procedure 1, the product was isolated by flash chromatography (PE: EA = 4:1) as a colorless oil in 38.0 mg, 63% yield.

**TLC:** (SiO<sub>2</sub>): R<sub>f</sub> (PE: EA= 4: 1) = 0.4

**<sup>1</sup>H NMR** (400 MHz, CDCl<sub>3</sub>) δ 8.44 (d, *J* = 6.1 Hz, 2H), 7.34 (d, *J* = 8.4 Hz, 2H), 7.08 (s, 2H), 7.01 (d, *J* = 8.4 Hz, 2H), 4.57 (d, *J* = 58.2 Hz, 2H), 4.05 (t, *J* = 7.9 Hz, 1H), 2.65 (d, *J* = 8.0 Hz, 2H), 1.62 (s, 3H).

**<sup>13</sup>C NMR** (101 MHz, CDCl<sub>3</sub>) δ 153.2, 149.6, 141.9, 141.7, 131.8, 129.7, 123.3, 120.7, 113.6, 48.0, 43.0, 22.5.

**HRMS (ESI):** C<sub>16</sub>H<sub>16</sub>BrNH<sup>+</sup> [M+H]<sup>+</sup> Calcd 302.0539, Found 302.0540.

#### 4-(1-(3-bromophenyl)-3-methylbut-3-en-1-yl) pyridine (9)

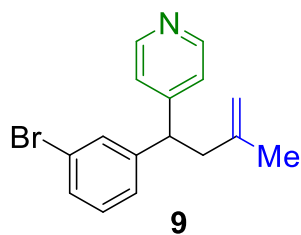

According to the general procedure 1, the product was isolated by flash chromatography (PE: EA = 4:1) as a colorless oil in 30.4 mg, 51% yield.

**TLC:** (SiO<sub>2</sub>): R<sub>f</sub> (PE: EA= 4: 1) = 0.4

**<sup>1</sup>H NMR** (400 MHz, CDCl<sub>3</sub>) 8.50 (d, *J* = 6.1 Hz, 2H), 7.36 – 7.33 (m, 2H), 7.20 – 7.14 (m, 2H), 7.13 (d, *J* = 6.1 Hz, 2H), 4.66 (d, *J* = 57.4 Hz, 2H), 4.11 (t, *J* = 7.9 Hz, 1H), 2.74 (d, *J* = 8.0 Hz, 2H), 1.69 (s, 3H).

**<sup>13</sup>C NMR** (101 MHz, CDCl<sub>3</sub>) δ 152.6, 149.9, 145.1, 141.9, 131.0, 130.2, 129.9, 126.6, 123.3, 122.7, 113.6, 48.3, 42.9, 22.5.

**HRMS (ESI):** C<sub>16</sub>H<sub>16</sub>BrNH<sup>+</sup> [M+H]<sup>+</sup> Calcd 302.0539, Found 302.0549.

**4-(3-methyl-1-(4-(trifluoromethyl) phenyl) but-3-en-1-yl) pyridine (10)**

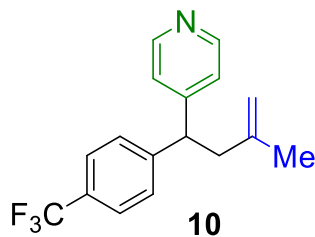

According to the general procedure 1, the product was isolated by flash chromatography (PE: EA = 4:1) as a colorless oil in 35.2 mg, 61% yield.

**TLC:** (SiO<sub>2</sub>): R<sub>f</sub> (PE: EA= 4: 1) = 0.4

**<sup>1</sup>H NMR** (400 MHz, CDCl<sub>3</sub>) δ 8.43 (d, *J* = 4.8 Hz, 2H), 7.47 (d, *J* = 8.1 Hz, 2H), 7.24 (d, *J* = 8.3 Hz, 2H), 7.06 (d, *J* = 6.3 Hz, 2H), 4.58 (d, *J* = 56.9 Hz, 2H), 4.14 (t, *J* = 7.9 Hz, 1H), 2.69 (d, *J* = 8.0 Hz, 2H), 1.62 (s, 3H).

**<sup>13</sup>C NMR** (101 MHz, CDCl<sub>3</sub>) δ 152.5, 149.9, 146.8 (d, *J* = 1.5 Hz), 141.8, 129.1 (q, *J* = 32.5 Hz), 128.3, 125.6 (q, *J* = 3.6 Hz), 123.3, 122.7, 113.6, 48.4, 42.9, 22.4.

**<sup>19</sup>F NMR** (376 MHz, CDCl<sub>3</sub>) δ -62.44.

**HRMS (ESI):** C<sub>17</sub>H<sub>16</sub>F<sub>3</sub>NH<sup>+</sup> [M+H]<sup>+</sup> Calcd 292.1308, Found 292.1314.

**4-(3-methyl-1-(3-(trifluoromethyl) phenyl) but-3-en-1-yl) pyridine (11)**

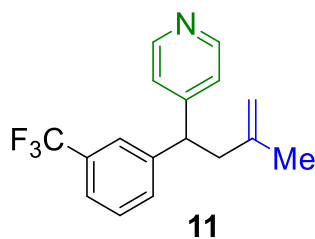

According to the general procedure 1, the product was isolated by flash chromatography (PE: EA = 4:1) as a colorless oil in 17.6 mg, 30% yield.

**TLC:** (SiO<sub>2</sub>): R<sub>f</sub> (PE: EA= 4: 1) = 0.4

**<sup>1</sup>H NMR** (400 MHz, CDCl<sub>3</sub>) δ 8.45 (d, *J* = 6.0 Hz, 2H), 7.44 – 7.29 (m, 4H), 7.08 (d, *J* = 6.3 Hz, 2H), 4.59 (d, *J* = 58.8 Hz, 2H), 4.15 (t, *J* = 7.9 Hz, 1H), 2.71 (dd, *J* = 8.0, 4.0 Hz, 2H), 1.63 (s, 3H).

**<sup>13</sup>C NMR** (101 MHz, CDCl<sub>3</sub>) δ 153.1, 149.4, 143.5, 141.6, 131.1 (q, *J* = 32.0 Hz), 129.2, 125.4, 124.6 (q, *J* = 4.0 Hz), 123.8 (t, *J* = 3.6 Hz), 123.4, 122.7, 113.8, 48.4, 43.0, 22.4.

**<sup>19</sup>F NMR** (376 MHz, CDCl<sub>3</sub>) δ -62.56.

**HRMS (ESI):** C<sub>17</sub>H<sub>16</sub>F<sub>3</sub>NH<sup>+</sup> [M+H]<sup>+</sup> Calcd 292.1308, Found 292.1317.

**methyl 4-(3-methyl-1-(pyridin-4-yl) but-3-en-1-yl) benzoate (12)**

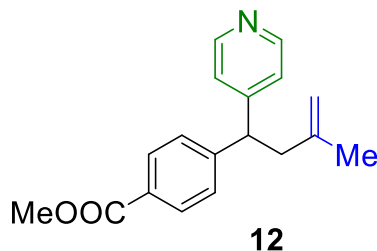

According to the general procedure 1, the product was isolated by flash chromatography (PE: EA = 4:1) as a colorless oil in 27.1 mg, 48% yield.

**TLC:** (SiO<sub>2</sub>): R<sub>f</sub> (PE: EA= 4: 1) = 0.4

**<sup>1</sup>H NMR** (400 MHz, CDCl<sub>3</sub>) δ 8.50 (d, *J* = 6.3 Hz, 2H), 7.97 (d, *J* = 8.4 Hz, 2H), 7.29 (d, *J* = 8.4 Hz, 2H), 7.14 (d, *J* = 6.3 Hz, 2H), 4.65 (d, *J* = 54.7 Hz, 2H), 4.21 (t, *J* = 7.9 Hz, 1H), 3.89 (s, 3H), 2.78 (d, *J* = 8.0 Hz, 2H), 1.70 (s, 3H).

**<sup>13</sup>C NMR** (101 MHz, CDCl<sub>3</sub>) δ 166.8, 152.6, 149.9, 148.0, 141.9, 130.0, 128.7, 128.0, 123.3, 113.6, 52.1, 48.6, 42.9, 22.5.

**HRMS (ESI):** C<sub>18</sub>H<sub>19</sub>NO<sub>2</sub>H<sup>+</sup> [M+H]<sup>+</sup> Calcd 282.1489, Found 282.1495.

**4-(3-methyl-1-(naphthalen-2-yl) but-3-en-1-yl) pyridine (13)**

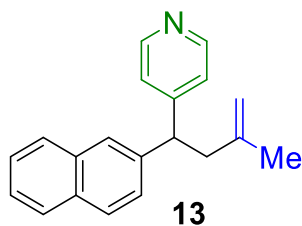

According to the general procedure 1, the product was isolated by flash chromatography (PE: EA = 4:1) as a colorless oil in 16.2 mg, 34% yield.

**TLC:** (SiO<sub>2</sub>): R<sub>f</sub> (PE: EA= 4: 1) = 0.4

**<sup>1</sup>H NMR** (400 MHz, CDCl<sub>3</sub>) δ 8.40 (d, *J* = 6.1 Hz, 2H), 7.71 – 7.66 (m, 3H), 7.59 (s, 1H), 7.40 – 7.32 (m, 2H), 7.20 (dd, *J* = 8.5, 2.0 Hz, 1H), 7.11 (d, *J* = 6.3 Hz, 2H), 4.58 (d, *J* = 36.5 Hz, 2H), 4.23 (t, *J* = 7.9 Hz, 1H), 2.77 (dd, *J* = 7.9, 3.9 Hz, 2H), 1.63 (s, 3H).

**<sup>13</sup>C NMR** (101 MHz, CDCl<sub>3</sub>) δ 153.6, 149.7, 142.3, 140.2, 133.5, 132.4, 128.4, 127.8, 127.7, 126.4, 126.3, 126.3, 125.8, 123.5, 113.4, 48.7, 43.0, 22.6.

**HRMS (ESI):** C<sub>20</sub>H<sub>19</sub>NH<sup>+</sup> [M+H]<sup>+</sup> Calcd 274.1590, Found 274.1582.

#### 4-(1-([1,1'-biphenyl]-4-yl)-3-methylbut-3-en-1-yl) pyridine (14)

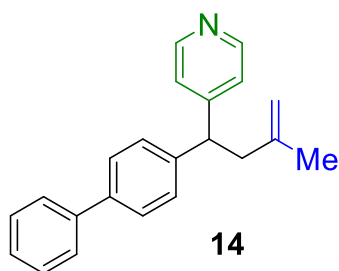

According to the general procedure 1, the product was isolated by flash chromatography (PE: EA = 4:1) as a colorless oil in 37 mg, 62% yield.

**TLC:** (SiO<sub>2</sub>): R<sub>f</sub> (PE: EA= 4: 1) = 0.4

**<sup>1</sup>H NMR** (400 MHz, CDCl<sub>3</sub>) δ 8.43 (d, *J* = 6.0 Hz, 2H), 7.51 – 7.42 (m, 4H), 7.36 – 7.32 (m, 2H), 7.27 – 7.21 (m, 3H), 7.13 (d, *J* = 6.1 Hz, 2H), 4.60 (d, *J* = 46.0 Hz, 2H), 4.13 (t, *J* = 7.9 Hz, 1H), 2.73 (d, *J* = 7.9 Hz, 2H), 1.65 (s, 3H).

**<sup>13</sup>C NMR** (101 MHz, CDCl<sub>3</sub>) δ 155.1, 148.5, 142.1, 141.5, 140.5, 139.8, 128.8, 128.3, 127.4, 127.4, 127.0, 123.8, 113.5, 48.4, 43.1, 22.6.

**HRMS (ESI):** C<sub>22</sub>H<sub>21</sub>NNa<sup>+</sup> [M+Na]<sup>+</sup> Calcd 322.1566, Found 322.1566.

#### 2-(3-methyl-1-(pyridin-4-yl)but-3-en-1-yl) pyridine (15)

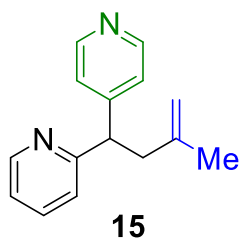

According to the general procedure 1, the product was isolated by flash chromatography (PE: EA = 1:1) as a colorless oil in 19.3 mg, 43% yield.

**TLC:** (SiO<sub>2</sub>): R<sub>f</sub> (PE: EA= 1: 1) = 0.5

**<sup>1</sup>H NMR** (400 MHz, CDCl<sub>3</sub>) δ 8.50 (d, *J* = 4.9 Hz, 1H), 8.44 (d, *J* = 4.8 Hz, 2H), 7.54 (td, *J* = 7.7, 1.9 Hz, 1H), 7.27 (d, *J* = 4.8 Hz, 2H), 7.14 – 7.04 (m, 2H), 4.57 (d, *J* = 40.4 Hz, 2H), 4.23 (t, *J* = 7.8 Hz, 1H), 2.91 (dd, *J* = 14.1, 7.2 Hz, 1H), 2.73 (dd, *J* = 14.6, 7.9 Hz, 1H), 1.63 (s, 3H).

**<sup>13</sup>C NMR** (101 MHz, CDCl<sub>3</sub>) δ 161.4, 153.3, 149.6, 148.8, 142.3, 136.7, 123.8, 122.9, 122.0, 113.1, 51.1, 42.5, 22.6.

**HRMS (ESI):** C<sub>15</sub>H<sub>16</sub>N<sub>2</sub>H<sup>+</sup> [M+H]<sup>+</sup> Calcd 225.1386, Found 225.1393.

#### 4-(4-methyl-2-phenylpent-4-en-2-yl) pyridine (16)

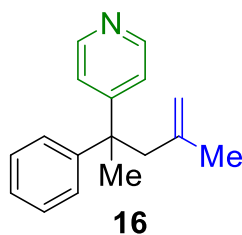

According to the general procedure 1, the product was isolated by flash chromatography (PE: EA = 4:1) as a pale yellow oil in 30 mg, 64% yield.

**TLC:** (SiO<sub>2</sub>): R<sub>f</sub> (PE: EA= 4: 1) = 0.4

**<sup>1</sup>H NMR** (400 MHz, CDCl<sub>3</sub>) δ 8.41 (d, *J* = 6.0 Hz, 2H), 7.23 – 7.18 (m, 2H), 7.15 – 7.09 (m, 5H), 4.61 (d, *J* = 105.1 Hz, 2H), 2.82 (s, 2H), 1.58 (s, 3H), 1.11 (s, 3H).

**<sup>13</sup>C NMR** (101 MHz, CDCl<sub>3</sub>) δ 159.7, 149.0, 147.6, 141.9, 128.2, 127.5, 126.4, 123.0, 116.0, 48.7, 45.9, 26.7, 24.4.

**HRMS (ESI):** C<sub>17</sub>H<sub>19</sub>NH<sup>+</sup> [M+H]<sup>+</sup> Calcd 238.1590, Found 238.1585.

#### 4-(2-(4-chlorophenyl)-4-methylpent-4-en-2-yl) pyridine (17)

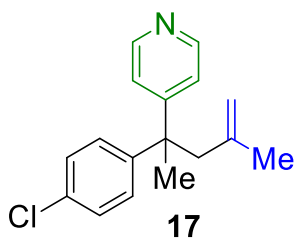

According to the general procedure 1, the product was isolated by flash chromatography (PE: EA = 4:1) as a colorless oil in 28.8 mg, 53% yield.

**TLC:** (SiO<sub>2</sub>): R<sub>f</sub> (PE: EA= 4: 1) = 0.4

**<sup>1</sup>H NMR** (400 MHz, CDCl<sub>3</sub>) δ 8.42 (d, *J* = 6.3 Hz, 2H), 7.19 – 7.16 (m, 2H), 7.07 – 7.03 (m, 4H), 4.61 (d, *J* = 109.4 Hz, 2H), 2.79 (s, 2H), 1.56 (s, 3H), 1.13 (s, 3H).

**<sup>13</sup>C NMR** (101 MHz, CDCl<sub>3</sub>) δ 158.9, 149.4, 146.2, 141.5, 132.2, 128.9, 128.3, 122.7, 116.3, 48.7, 45.6, 26.7, 24.5.

**HRMS (ESI):** C<sub>17</sub>H<sub>18</sub>NClH<sup>+</sup> [M+H]<sup>+</sup> Calcd 272.1201, Found 272.1198.

#### 4-(4-methyl-2-(p-tolyl) pent-4-en-2-yl) pyridine (18)

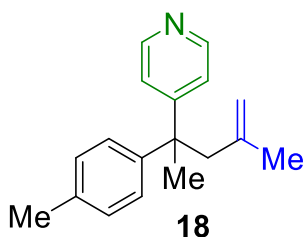

According to the general procedure 1, the product was isolated by flash chromatography (PE: EA = 4:1) as a colorless oil in 25 mg, 50% yield.

**TLC:** (SiO<sub>2</sub>): R<sub>f</sub> (PE: EA= 4: 1) = 0.4

**<sup>1</sup>H NMR** (400 MHz, CDCl<sub>3</sub>) δ 8.41 (d, *J* = 5.8 Hz, 2H), 7.12 (d, *J* = 6.1 Hz, 2H), 7.04 – 6.97 (m, 4H), 4.60 (d, *J* = 104.6 Hz, 2H), 2.81 (s, 2H), 2.24 (s, 3H), 1.57 (s, 3H), 1.12 (s, 3H).

**<sup>13</sup>C NMR** (101 MHz, CDCl<sub>3</sub>) δ 160.3, 148.6, 144.6, 142.0, 136.0, 128.9, 127.3, 123.1, 115.9, 48.7, 45.6, 26.7, 24.5, 20.9.

**HRMS (ESI):** C<sub>18</sub>H<sub>21</sub>NH<sup>+</sup> [M+H]<sup>+</sup> Calcd 252.1747, Found 252.1743.

#### 4-(1-(4-(tert-butyl) phenyl)-3-methylbut-3-en-1-yl) pyridine (19)

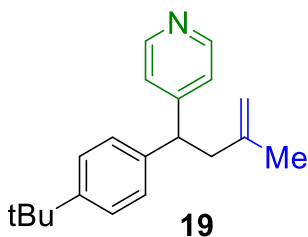



According to the general procedure 1, the product was isolated by flash chromatography (PE: EA = 4:1) as a colorless oil in 28.6 mg, 49% yield.

**TLC:** (SiO<sub>2</sub>): R<sub>f</sub> (PE: EA= 4: 1) = 0.4

**<sup>1</sup>H NMR** (400 MHz, CDCl<sub>3</sub>) δ 8.40 (d, *J* = 6.1 Hz, 2H), 7.23 (d, *J* = 8.5 Hz, 2H), 7.11 – 7.03 (m, 4H), 4.57 (d, *J* = 47.5 Hz, 2H), 4.05 (t, *J* = 7.9 Hz, 1H), 2.68 (d, *J* = 7.5 Hz, 2H), 1.62 (s, 3H), 1.21 (s, 9H).

**<sup>13</sup>C NMR** (101 MHz, CDCl<sub>3</sub>) δ 153.8, 149.6, 142.5, 139.8, 127.4, 125.5, 123.5, 113.1, 48.3, 43.2, 34.4, 31.4, 22.6.

**HRMS (ESI):** C<sub>20</sub>H<sub>25</sub>NNa<sup>+</sup> [M+Na]<sup>+</sup> Calcd 302.1879, Found 302.1876.

**(2S,5R)-2-isopropyl-5-methylcyclohexyl 4-(3-methyl-1-(pyridin-4-yl) but-3-en-1-yl) benzoate (20)**

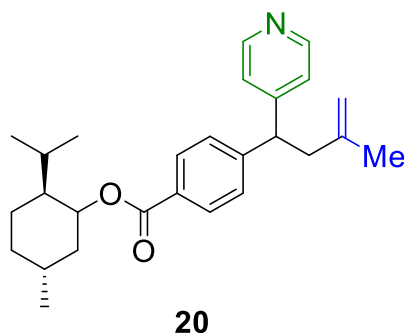

According to the general procedure 1, the product was isolated by flash chromatography (PE: EA = 4:1) as a pale yellow oil in 49.0 mg, 60% yield.

**TLC:** (SiO<sub>2</sub>): R<sub>f</sub> (PE: EA= 4: 1) = 0.4

**<sup>1</sup>H NMR** (400 MHz, CDCl<sub>3</sub>) δ 8.42 (d, *J* = 5.8 Hz, 2H), 7.90 (d, *J* = 8.4 Hz, 2H), 7.21 (d, *J* = 8.3 Hz, 2H), 7.07 (d, *J* = 4.4 Hz, 2H), 4.83 (td, *J* = 10.9, 4.4 Hz, 1H), 4.59 (d, *J* = 51.9 Hz, 2H), 4.14 (t, *J* = 7.9 Hz, 1H), 2.70 (d, *J* = 7.9 Hz, 2H), 2.05 – 1.99 (m, 1H), 1.92 – 1.83 (m, 1H), 1.69 – 1.59 (m, 5H), 1.50 – 1.41 (m, 2H), 1.20 – 0.94 (m, 3H), 0.88 – 0.79 (m, 6H), 0.70 (d, *J* = 7.0 Hz, 3H).

**<sup>13</sup>C NMR** (101 MHz, CDCl<sub>3</sub>) δ 165.8, 152.9, 152.8, 149.8, 147.7, 141.9, 130.0, 129.5, 127.9, 123.3, 113.5, 74.8, 48.6, 47.2, 42.9, 42.9, 41.0, 34.3, 31.4, 26.4, 23.6, 22.5, 22.1, 20.8, 16.5.

**HRMS (ESI):** C<sub>27</sub>H<sub>35</sub>NO<sub>2</sub>H<sup>+</sup> [M+H]<sup>+</sup> Calcd 406.2741, Found 406.2748.

**4-(3-methyl-1-(pyridin-4-yl) but-3-en-1-yl) benzyl 5-(2,5-dimethylphenoxy)-2,2-dimethylpentanoate (21)**

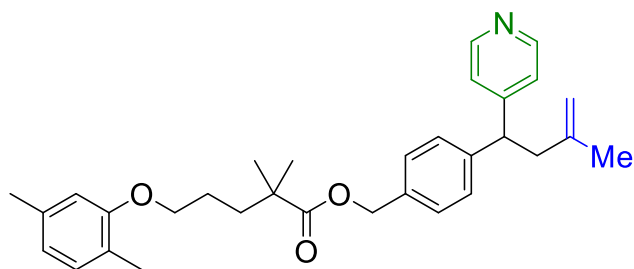

**21**

According to the general procedure 1, the product was isolated by flash chromatography (PE: EA = 4:1) as a colorless oil in 54.0 mg, 57% yield.

**TLC:** (SiO<sub>2</sub>): R<sub>f</sub> (PE: EA= 4: 1) = 0.4

**<sup>1</sup>H NMR** (400 MHz, CDCl<sub>3</sub>) δ 8.40 (d, *J* = 6.1 Hz, 2H), 7.19 (d, *J* = 8.3 Hz, 2H), 7.10 (d, *J* = 8.3 Hz, 2H), 7.06 (d, *J* = 6.3 Hz, 2H), 6.91 (d, *J* = 7.9 Hz, 1H), 6.57 (d, *J* = 7.5 Hz, 1H), 6.51 (s, 1H), 4.99 (s, 2H), 4.56 (d, *J* = 50.9 Hz, 2H), 4.06 (t, *J* = 7.9 Hz, 1H), 3.79 (t, *J* = 5.8 Hz, 2H), 2.66 (d, *J* = 7.9 Hz, 2H), 2.22 (s, 3H), 2.06 (s, 3H), 1.68 – 1.62 (m, 4H), 1.61 (s, 3H), 1.15 (s, 6H).

**<sup>13</sup>C NMR** (101 MHz, CDCl<sub>3</sub>) δ 177.6, 156.9, 153.4, 149.7, 142.7, 142.2, 136.5, 134.9, 130.3, 128.1, 128.0, 123.6, 123.4, 120.7, 113.3, 111.9, 67.9, 65.8, 48.4, 43.1, 42.2, 37.1, 25.2, 25.2, 22.5, 21.5, 15.8.

**HRMS (ESI):** C<sub>32</sub>H<sub>39</sub>NO<sub>3</sub>H<sup>+</sup> [M+H]<sup>+</sup> Calcd 486.3003, Found 486.3013.

#### 4-(1,3-diphenylbut-3-en-1-yl) pyridine (22)

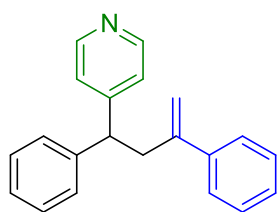

**22**

According to the general procedure 1, the product was isolated by flash chromatography (PE: EA = 4:1) as a colorless oil in 25.0 mg, 44% yield.

**TLC:** (SiO<sub>2</sub>): R<sub>f</sub> (PE: EA= 4: 1) = 0.4

**<sup>1</sup>H NMR** (400 MHz, CDCl<sub>3</sub>) δ 8.38 (d, *J* = 6.3 Hz, 2H), 7.28 – 7.22 (m, 4H), 7.22 – 7.10 (m, 4H), 7.08 – 7.05 (m, 2H), 7.00 (d, *J* = 6.3 Hz, 2H), 4.92 (d, *J* = 121.6 Hz, 2H), 3.96 (t, *J* = 7.8 Hz, 1H), 3.24 – 3.10 (m, 2H).

**$^{13}\text{C}$  NMR** (101 MHz,  $\text{CDCl}_3$ )  $\delta$  153.7, 149.3, 145.5, 142.6, 140.6, 128.7, 128.6, 128.0, 127.7, 126.9, 126.4, 123.6, 115.6, 48.6, 41.0.

**HRMS (ESI):**  $\text{C}_{21}\text{H}_{19}\text{NH}^+$   $[\text{M}+\text{H}]^+$  Calcd 286.1590, Found 286.1585.

**4-(1-phenylbut-3-en-1-yl) pyridine (23)**

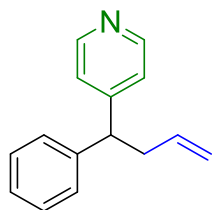

**23**

According to the general procedure 1, the product was isolated by flash chromatography (PE: EA = 4:1) as a colorless oil in 8.0 mg, 20% yield.

**TLC:** ( $\text{SiO}_2$ ):  $R_f$  (PE: EA= 4: 1) = 0.4

**$^1\text{H}$  NMR** (400 MHz,  $\text{CDCl}_3$ )  $\delta$  8.43 (d,  $J$  = 6.1 Hz, 2H), 7.27 – 7.21 (m, 2H), 7.19 – 7.12 (m, 3H), 7.10 (d,  $J$  = 6.3 Hz, 2H), 5.66 – 5.56 (m, 1H), 5.00 – 4.88 (m, 2H), 3.92 (t,  $J$  = 7.8 Hz, 1H), 2.76 – 2.72 (m, 2H).

**$^{13}\text{C}$  NMR** (101 MHz,  $\text{CDCl}_3$ )  $\delta$  153.7, 149.5, 142.5, 135.7, 128.7, 128.0, 126.9, 123.5, 117.2, 50.6, 39.2.

**HRMS (ESI):**  $\text{C}_{15}\text{H}_{15}\text{NH}^+$   $[\text{M}+\text{H}]^+$  Calcd 210.1277, Found 210.1280.

**4-(2-(cyclohex-1-en-1-yl)-1-phenylethyl) pyridine (24)**

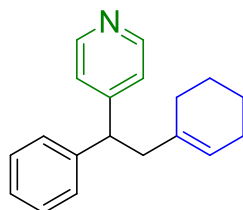

**24**

According to the general procedure 1, the product was isolated by flash chromatography (PE: EA = 4:1) as a colorless oil in 16.8 mg, 32% yield.

**TLC:** ( $\text{SiO}_2$ ):  $R_f$  (PE: EA= 4: 1) = 0.4

**$^1\text{H}$  NMR** (400 MHz,  $\text{CDCl}_3$ )  $\delta$  8.40 (d,  $J$  = 5.4 Hz, 2H), 7.23 – 7.19(m, 2H), 7.15 – 7.11 (m, 3H), 7.07 (d,  $J$  = 6.1 Hz, 2H), 5.20 – 5.18 (m, 1H), 4.04 (t,  $J$  = 7.9 Hz, 1H), 2.59 (d,  $J$  = 8.0 Hz, 2H), 1.81 – 1.75 (m, 4H), 1.52 – 1.42 (m, 2H), 1.41 – 1.31 (m, 2H).

**<sup>13</sup>C NMR** (101 MHz, CDCl<sub>3</sub>) δ 154.2, 149.4, 143.2, 134.4, 128.5, 128.0, 126.6, 124.4, 123.6, 48.8, 43.5, 28.5, 25.2, 22.9, 22.3.

**HRMS (ESI):** C<sub>19</sub>H<sub>21</sub>NH<sup>+</sup> [M+H]<sup>+</sup> Calcd 264.1747, Found 264.1747.

**4-(2-(4,4-difluorocyclohex-1-en-1-yl)-1-phenylethyl) pyridine (25)**

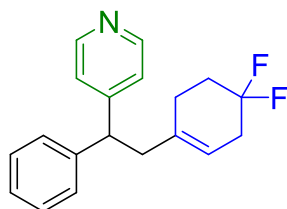

**25**

According to the general procedure 1, the product was isolated by flash chromatography (PE: EA = 4:1) as a colorless oil in 23.1 mg, 39% yield.

**TLC:** (SiO<sub>2</sub>): R<sub>f</sub> (PE: EA= 4: 1) = 0.4

**<sup>1</sup>H NMR** (400 MHz, CDCl<sub>3</sub>) δ 8.42 (d, *J* = 5.3 Hz, 2H), 7.25 – 7.18 (m, 2H), 7.17 – 7.08 (m, 3H), 7.05 (d, *J* = 5.9 Hz, 2H), 5.06 – 5.00 (m, 1H), 4.01 (t, *J* = 7.9 Hz, 1H), 2.66 (d, *J* = 7.9 Hz, 2H), 2.29 (t, *J* = 16.4 Hz, 2H), 2.12 – 2.05 (m, 2H), 1.91 – 1.80 (m, 2H).

**<sup>13</sup>C NMR** (101 MHz, CDCl<sub>3</sub>) δ 153.4, 149.7, 142.6, 134.2, 128.7, 127.9, 126.9, 125.1, 123.0 (d, *J* = 58.5 Hz), 119.3 (t, *J* = 5.3 Hz), 49.0, 42.3, 34.5 (t, *J* = 26.5 Hz), 30.3 (t, *J* = 24.3 Hz), 26.8 (t, *J* = 5.4 Hz).

**<sup>19</sup>F NMR** (376 MHz, CDCl<sub>3</sub>) δ -96.78 – -97.03 (m).

**HRMS (ESI):** C<sub>19</sub>H<sub>19</sub>F<sub>2</sub>NH<sup>+</sup> [M+H]<sup>+</sup> Calcd 300.1558, Found 300.1566.

**4-(2-(3,6-dihydro-2H-pyran-4-yl)-1-phenylethyl) pyridine (26)**

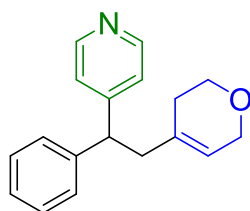

**26**

According to the general procedure 1, the product was isolated by flash chromatography (PE: EA = 3:2) as a colorless oil in 17.6 mg, 33% yield.

**TLC:** (SiO<sub>2</sub>): R<sub>f</sub> (PE: EA= 3: 2) = 0.4

**<sup>1</sup>H NMR** (400 MHz, CDCl<sub>3</sub>) δ 8.41 (d, *J* = 5.8 Hz, 2H), 7.25 – 7.19 (m, 2H), 7.16 – 7.11 (m,

3H), 7.08 (d,  $J = 6.3$  Hz, 2H), 5.23 – 5.19 (m, 1H), 4.05 (t,  $J = 7.8$  Hz, 1H), 3.91 – 3.90 (m, 2H), 3.62 (t,  $J = 5.4$  Hz, 2H), 2.66 (d,  $J = 7.9$  Hz, 2H), 1.97 – 1.88 (m, 2H).

**$^{13}\text{C}$  NMR** (101 MHz,  $\text{CDCl}_3$ )  $\delta$  154.3, 149.6 (d,  $J = 96.6$  Hz), 142.5, 132.5, 128.9 (d,  $J = 38.5$  Hz), 127.8 (d,  $J = 21.1$  Hz), 126.9, 123.2 (d,  $J = 63.9$  Hz), 118.4, 65.5 (d,  $J = 51.6$  Hz), 64.1, 48.4 (d,  $J = 23.3$  Hz), 42.1 (d,  $J = 80.7$  Hz), 28.3 (d,  $J = 58.1$  Hz).

**HRMS (ESI):**  $\text{C}_{18}\text{H}_{19}\text{NOH}^+ [\text{M}+\text{H}]^+$  Calcd 266.1539, Found 266.1545.

**tert-butyl 4-(2-phenyl-2-(pyridin-4-yl) ethyl) piperidine-1-carboxylate (27)**

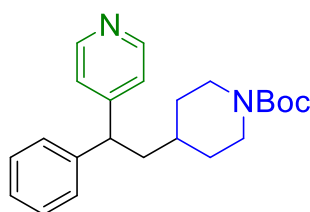

**27**

According to the general procedure 1, the product was isolated by flash chromatography (PE: EA = 1:1) as a colorless oil in 58.6 mg, 80% yield.

**TLC:** ( $\text{SiO}_2$ ):  $R_f$  (PE: EA = 1: 1) = 0.5

**$^1\text{H}$  NMR** (400 MHz,  $\text{CDCl}_3$ )  $\delta$  8.42 (d,  $J = 5.6$  Hz, 2H), 7.27 – 7.21 (m, 2H), 7.18 – 7.11 (m, 3H), 7.10 (d,  $J = 6.1$  Hz, 2H), 3.96 (t,  $J = 8.0$  Hz, 3H), 2.49 (s, 2H), 1.95 – 1.83 (m, 2H), 1.65 – 1.53 (m, 2H), 1.37 (s, 9H), 1.25 – 1.19 (m, 1H), 1.09 – 1.03 (m, 2H).

**$^{13}\text{C}$  NMR** (101 MHz,  $\text{CDCl}_3$ )  $\delta$  154.8, 154.2, 149.7, 142.7, 128.9, 127.8, 126.9, 123.3, 79.4, 47.4, 41.8, 33.4, 32.0, 28.5.

**HRMS (ESI):**  $\text{C}_{23}\text{H}_{30}\text{N}_2\text{O}_2\text{H}^+ [\text{M}+\text{H}]^+$  Calcd 367.2380, Found 367.2386.

**tert-butyl 4-(2-(pyridin-4-yl)-2-(p-tolyl) ethyl) piperidine-1-carboxylate (28)**

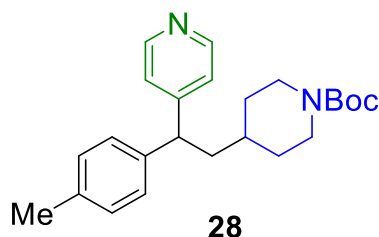

**28**

According to the general procedure 1, the product was isolated by flash chromatography (PE: EA = 1:1) as a colorless oil in 63.1 mg, 83% yield.

**TLC:** ( $\text{SiO}_2$ ):  $R_f$  (PE: EA = 1: 1) = 0.5

**$^1\text{H}$  NMR** (400 MHz,  $\text{CDCl}_3$ )  $\delta$  8.40 (d,  $J = 5.4$  Hz, 2H), 7.08 (d,  $J = 4.5$  Hz, 2H), 7.04 – 7.01 (m,

4H), 3.97 (s, 1H), 3.92 (t,  $J = 8.0$  Hz, 2H), 2.49 (s, 2H), 2.24 (s, 3H), 1.97 – 1.78 (m, 2H), 1.65 – 1.52 (m, 2H), 1.37 (s, 9H), 1.25 – 1.21 (m, 1H), 1.10 – 1.02 (m, 2H).

$^{13}\text{C}$  NMR (101 MHz,  $\text{CDCl}_3$ )  $\delta$  154.8, 154.3, 149.8, 139.7, 136.5, 129.5, 127.7, 123.2, 79.3, 47.0, 41.9, 33.4, 32.0, 28.5, 24.9, 21.0.

**HRMS (ESI):**  $\text{C}_{24}\text{H}_{32}\text{N}_2\text{O}_2\text{H}^+$   $[\text{M}+\text{H}]^+$  Calcd 381.2537, Found 381.2540.

**tert-butyl 4-(2-(4-methoxyphenyl)-2-(pyridin-4-yl) ethyl) piperidine-1-carboxylate (29)**

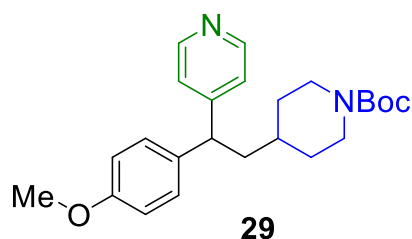

According to the general procedure 1, the product was isolated by flash chromatography (PE: EA = 1:1) as a colorless oil in 56.7 mg, 72% yield.

**TLC:** ( $\text{SiO}_2$ ):  $R_f$  (PE: EA = 1: 1) = 0.5

$^1\text{H}$  NMR (400 MHz,  $\text{CDCl}_3$ )  $\delta$  8.41 (d,  $J = 6.0$  Hz, 2H), 7.08 – 7.02 (m, 4H), 6.78 (d,  $J = 8.8$  Hz, 2H), 3.97 (s, 1H), 3.90 (t,  $J = 8.1$  Hz, 2H), 3.71 (s, 3H), 2.49 (s, 2H), 1.92 – 1.80 (m, 2H), 1.64 – 1.58 (m, 2H), 1.37 (s, 9H), 1.23 – 1.18 (m, 1H), 1.11 – 1.03 (m, 2H).

$^{13}\text{C}$  NMR (101 MHz,  $\text{CDCl}_3$ )  $\delta$  158.4, 154.8, 154.5, 149.8, 134.7, 128.8, 123.1, 114.2, 79.3, 55.3, 46.5, 42.0, 33.4, 32.3, 28.5.

**HRMS (ESI):**  $\text{C}_{24}\text{H}_{32}\text{N}_2\text{O}_3\text{H}^+$   $[\text{M}+\text{H}]^+$  Calcd 397.2486, Found 397.2494.

**tert-butyl 4-(2-(4-fluorophenyl)-2-(pyridin-4-yl) ethyl) piperidine-1-carboxylate (30)**

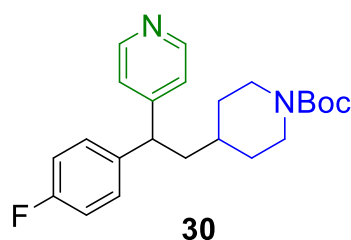

According to the general procedure 1, the product was isolated by flash chromatography (PE: EA = 1:1) as a colorless oil in 58.3 mg, 75% yield.

**TLC:** ( $\text{SiO}_2$ ):  $R_f$  (PE: EA = 1: 1) = 0.5

$^1\text{H}$  NMR (400 MHz,  $\text{CDCl}_3$ )  $\delta$  8.43 (d,  $J = 6.3$  Hz, 2H), 7.13 – 7.03 (m, 4H), 6.97 – 6.90 (m, 2H), 3.95 (t,  $J = 8.0$  Hz, 3H), 2.49 (s, 2H), 1.94 – 1.82 (m, 2H), 1.63 – 1.56 (m, 2H), 1.37 (s, 9H), 1.22 – 1.15 (m, 1H), 1.10 – 1.03 (m, 2H).

**<sup>13</sup>C NMR** (101 MHz, CDCl<sub>3</sub>) δ 162.9, 160.4, 154.8, 153.8, 149.8, 138.4, 129.2 (d, *J* = 8.0 Hz), 123.1, 115.7 (d, *J* = 21.1 Hz), 79.4, 46.6, 41.9, 33.4, 32.2, 28.5.

**<sup>19</sup>F NMR** (376 MHz, CDCl<sub>3</sub>) δ -115.69.

**HRMS (ESI):** C<sub>23</sub>H<sub>29</sub>FN<sub>2</sub>O<sub>2</sub>H<sup>+</sup> [M+H]<sup>+</sup> Calcd 385.2286, Found 385.2282.

**tert-butyl 4-(2-(3-fluorophenyl)-2-(pyridin-4-yl) ethyl) piperidine-1-carboxylate (31)**

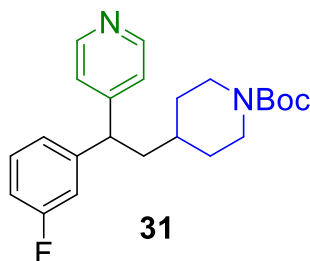

According to the general procedure 1, the product was isolated by flash chromatography (PE: EA = 1:1) as a colorless oil in 59 mg, 76% yield.

**TLC:** (SiO<sub>2</sub>): R<sub>f</sub> (PE: EA= 1: 1) = 0.5

**<sup>1</sup>H NMR** (400 MHz, CDCl<sub>3</sub>) δ 8.47 (d, *J* = 6.4 Hz, 2H), 7.23 – 7.17 (m, 1H), 7.09 (s, 2H), 6.95 – 6.80 (m, 3H), 4.10 – 3.99 (m, 1H), 3.95 (t, *J* = 8.1 Hz, 2H), 2.42 (d, *J* = 53.4 Hz, 2H), 1.92 – 1.84 (m, 2H), 1.63 – 1.57 (m, 2H), 1.37 (s, 9H), 1.24 – 1.17 (m, 1H), 1.14 – 1.02 (m, 2H).

**<sup>13</sup>C NMR** (101 MHz, CDCl<sub>3</sub>) δ 164.2, 161.8, 154.8, 153.2, 149.9, 145.3 (d, *J* = 6.5 Hz), 130.3 (d, *J* = 8.0 Hz), 123.6 (d, *J* = 2.9 Hz), 114.7 (d, *J* = 21.1 Hz), 113.9 (d, *J* = 21.1 Hz), 79.4, 47.1, 41.7, 33.3, 28.5.

**<sup>19</sup>F NMR** (376 MHz, CDCl<sub>3</sub>) δ -112.34.

**HRMS (ESI):** C<sub>23</sub>H<sub>29</sub>FN<sub>2</sub>O<sub>2</sub>H<sup>+</sup> [M+H]<sup>+</sup> Calcd 385.2286, Found 385.2284.

**tert-butyl 4-(2-(4-bromophenyl)-2-(pyridin-4-yl) ethyl) piperidine-1-carboxylate (32)**

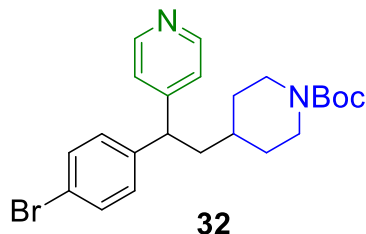

According to the general procedure 1, the product was isolated by flash chromatography (PE: EA = 1:1) as a colorless oil in 65.8 mg, 74% yield.

**TLC:** (SiO<sub>2</sub>): R<sub>f</sub> (PE: EA= 1: 1) = 0.5

**<sup>1</sup>H NMR** (400 MHz, CDCl<sub>3</sub>) δ 8.43 (d, *J* = 5.6 Hz, 2H), 7.38 – 7.34 (m, 2H), 7.05 (d, *J* = 6.1

Hz, 2H), 7.01 (d,  $J = 8.5$  Hz, 2H), 4.06 – 3.96 (m, 1H), 3.92 (t,  $J = 8.0$  Hz, 2H), 2.48 (s, 2H), 1.91 – 1.82 (m, 2H), 1.62 – 1.55 (m, 2H), 1.37 (s, 9H), 1.22 – 1.11 (m, 1H), 1.13 – 1.01 (m, 2H).

$^{13}\text{C}$  NMR (101 MHz,  $\text{CDCl}_3$ ) (101 MHz,  $\text{CDCl}_3$ )  $\delta$  154.8, 153.2, 150.0, 141.8, 131.9, 129.5, 123.1, 120.7, 79.4, 46.8, 41.7, 33.3, 31.9, 28.5, 24.9

**HRMS (ESI):**  $\text{C}_{23}\text{H}_{29}\text{BrN}_2\text{O}_2\text{H}^+$   $[\text{M}+\text{H}]^+$  Calcd 445.1485, Found 445.1480.

**tert-butyl 4-(2-(pyridin-4-yl)-2-(4-(trifluoromethyl) phenyl) ethyl) piperidine-1-carboxylate (33)**

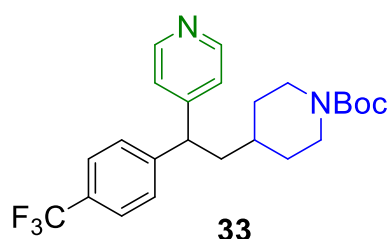

According to the general procedure 1, the product was isolated by flash chromatography (PE: EA = 1:1) as a colorless oil in 70.2 mg, 81% yield.

**TLC:** ( $\text{SiO}_2$ ):  $R_f$  (PE: EA = 1: 1) = 0.5

$^1\text{H}$  NMR (400 MHz,  $\text{CDCl}_3$ )  $\delta$  8.45 (d,  $J = 5.3$  Hz, 2H), 7.50 (d,  $J = 8.3$  Hz, 2H), 7.26 (d,  $J = 8.3$  Hz, 2H), 7.09 (d,  $J = 6.3$  Hz, 2H), 4.03 (t,  $J = 7.9$  Hz, 3H), 2.49 (s, 2H), 1.92 (t,  $J = 7.3$  Hz, 2H), 1.63 – 1.53 (m, 2H), 1.37 (s, 9H), 1.23 – 1.16 (d,  $J = 14.6$  Hz, 1H), 1.11 – 1.08 (m, 2H).

$^{13}\text{C}$  NMR (101 MHz,  $\text{CDCl}_3$ )  $\delta$  154.8, 153.0, 149.9, 146.8, 129.1, 128.2, 125.8 (t,  $J = 3.6$  Hz), 123.2, 79.5, 47.2, 41.7, 33.3, 32.2, 28.5.

$^{19}\text{F}$  NMR (376 MHz,  $\text{CDCl}_3$ )  $\delta$  -62.46.

**HRMS (ESI):**  $\text{C}_{24}\text{H}_{29}\text{F}_3\text{N}_2\text{O}_2\text{H}^+$   $[\text{M}+\text{H}]^+$  Calcd 435.2254, Found 435.2252.

**tert-butyl 4-(2-(pyridin-4-yl)-2-(3-(trifluoromethyl) phenyl) ethyl) piperidine-1-carboxylate (34)**

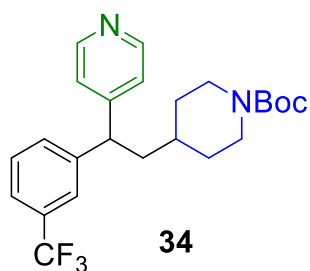

According to the general procedure 1, the product was isolated by flash chromatography



(PE: EA = 1:1) as a colorless oil in 56.7 mg, 65% yield.

**TLC:** (SiO<sub>2</sub>): R<sub>f</sub> (PE: EA= 1: 1) = 0.5

**<sup>1</sup>H NMR** (400 MHz, CDCl<sub>3</sub>) δ 8.46 (d, *J* = 5.0 Hz, 2H), 7.45 – 7.30 (m, 4H), 7.09 (d, *J* = 6.3 Hz, 2H), 4.03 (t, *J* = 8.0 Hz, 3H), 2.49 (s, 2H), 1.99 – 1.87 (m, 2H), 1.62 – 1.59 (m, 2H), 1.37 (s, 9H), 1.22 – 1.17 (m, 1H), 1.14 – 1.04 (m, 2H).

**<sup>13</sup>C NMR** (101 MHz, CDCl<sub>3</sub>) δ 154.8, 152.9, 150.0, 143.8, 131.2, 129.4, 125.3, 124.4 (t, *J* = 4.0 Hz), 123.9 (t, *J* = 3.6 Hz), 123.1, 122.6, 79.4, 47.2, 41.7, 33.4, 32.1, 28.5.

**HRMS (ESI):** C<sub>24</sub>H<sub>29</sub>F<sub>3</sub>N<sub>2</sub>O<sub>2</sub>H<sup>+</sup> [M+H]<sup>+</sup> Calcd 435.2254, Found 435.2251.

**<sup>19</sup>F NMR** (376 MHz, CDCl<sub>3</sub>) δ -62.51.

**tert-butyl 4-(2-([1,1'-biphenyl]-4-yl)-2-(pyridin-4-yl) ethyl) piperidine-1-carboxylate (35)**

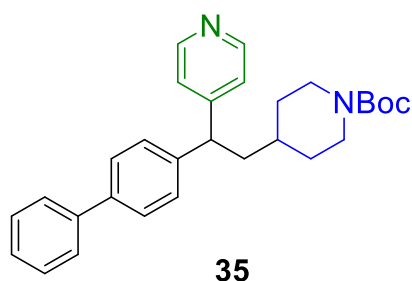

According to the general procedure 1, the product was isolated by flash chromatography (PE: EA = 1:1) as a colorless oil in 68 mg, 77% yield.

**TLC:** (SiO<sub>2</sub>): R<sub>f</sub> (PE: EA= 1: 1) = 0.5

**<sup>1</sup>H NMR** (400 MHz, CDCl<sub>3</sub>) δ 8.44 (d, *J* = 6.0 Hz, 2H), 7.50 – 7.46 (m, 4H), 7.38 – 7.33 (m, 2H), 7.29 – 7.19 (m, 3H), 7.13 (d, *J* = 6.3 Hz, 2H), 4.00 (t, *J* = 8.0 Hz, 3H), 2.50 (s, 2H), 2.01 – 1.86 (m, 2H), 1.67 – 1.60 (m, 2H), 1.37 (s, 9H), 1.30 – 1.20 (m, 1H), 1.16 – 1.03 (m, 2H).

**<sup>13</sup>C NMR** (101 MHz, CDCl<sub>3</sub>). δ 154.8, 154.0, 149.8, 141.8, 140.5, 139.8, 128.8, 128.2, 127.5, 127.4, 127.0, 123.2, 79.4, 47.1, 41.9, 33.4, 32.0, 28.5.

**HRMS (ESI):** C<sub>29</sub>H<sub>34</sub>N<sub>2</sub>O<sub>2</sub>H<sup>+</sup> [M+H]<sup>+</sup> Calcd 443.2693, Found 443.2700.

**tert-butyl 4-(2-(naphthalen-2-yl)-2-(pyridin-4-yl) ethyl) piperidine-1-carboxylate (36)**

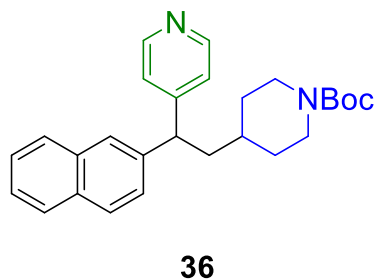

According to the general procedure 1, the product was isolated by flash chromatography (PE: EA = 1:1) as a colorless oil in 57 mg, 68% yield.

**TLC:** (SiO<sub>2</sub>): R<sub>f</sub> (PE: EA= 1: 1) = 0.5

**<sup>1</sup>H NMR** (400 MHz, CDCl<sub>3</sub>) δ 8.42 (d, *J* = 6.1 Hz, 2H), 7.76 – 7.58 (m, 4H), 7.43 – 7.36 (m, 1.6 Hz, 2H), 7.22 (dd, *J* = 8.5, 1.9 Hz, 1H), 7.13 (d, *J* = 6.3 Hz, 2H), 4.12 (t, *J* = 8.0 Hz, 1H), 3.97 (s, 2H), 2.47 (s, 2H), 2.22 (s, 1H), 2.09 – 2.02 (m, 1H), 1.70 – 1.59 (m, 2H), 1.36 (s, 9H), 1.26 – 1.20 m, 1H), 1.18 – 1.06 (m, 2H).

**<sup>13</sup>C NMR** (101 MHz, CDCl<sub>3</sub>) δ 154.8, 153.9, 149.8, 140.1, 133.5, 132.4, 128.6, 127.7, 127.7, 126.4, 126.3, 126.2, 125.9, 123.3, 79.4, 47.4, 41.6, 33.4, 32.0, 28.5.

**HRMS (ESI):** C<sub>27</sub>H<sub>32</sub>N<sub>2</sub>O<sub>2</sub>H<sup>+</sup> [M+H]<sup>+</sup> Calcd 417.2537, Found 417.2539.

**tert-butyl 4-(2-(pyridin-2-yl)-2-(pyridin-4-yl) ethyl) piperidine-1-carboxylate (37)**

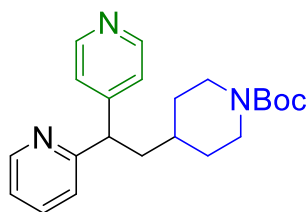

**37**

According to the general procedure 1, the product was isolated by flash chromatography (PE: EA = 3:1) as a colorless oil in 46.3 mg, 63% yield.

**TLC:** (SiO<sub>2</sub>): R<sub>f</sub> (PE: EA= 3: 1) = 0.5

**<sup>1</sup>H NMR** (400 MHz, CDCl<sub>3</sub>) δ 8.53 – 8.48 (m, 1H), 8.43 (d, *J* = 5.9 Hz, 2H), 7.53 (td, *J* = 7.7, 1.9 Hz, 1H), 7.21 (dd, *J* = 3.9, 2.4 Hz, 2H), 7.12 – 7.05 (m, 2H), 4.09 (t, *J* = 7.9 Hz, 1H), 3.96 (s, 2H), 2.48 (s, 2H), 2.17 – 1.89 (m, 2H), 1.67 – 1.55 (m, 2H), 1.36 (s, 9H), 1.20 – 1.14 (m, 1H), 1.13 – 0.98 (m, 2H).

**<sup>13</sup>C NMR** (101 MHz, CDCl<sub>3</sub>) δ 161.7, 154.8, 152.6, 149.8, 149.6, 136.8, 123.4, 122.8, 121.9, 79.3, 49.8, 41.2, 33.5, 32.1, 28.5.

**HRMS (ESI):** C<sub>22</sub>H<sub>29</sub>N<sub>3</sub>O<sub>2</sub>H<sup>+</sup> [M+H]<sup>+</sup> Calcd 368.2333, Found 368.2335.

**tert-butyl 4-(2-phenyl-2-(pyridin-4-yl) propyl) piperidine-1-carboxylate (38)**

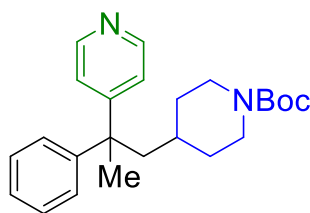

**38**

According to the general procedure 1, the product was isolated by flash chromatography (PE: EA = 1:1) as a colorless oil in 66.4 mg, 87% yield.

**TLC:** (SiO<sub>2</sub>): R<sub>f</sub> (PE: EA= 1: 1) = 0.5

**<sup>1</sup>H NMR** (400 MHz, CDCl<sub>3</sub>) δ 8.48 – 8.35 (m, 2H), 7.21 (d, *J* = 8.1 Hz, 2H), 7.17 – 7.08 (m, 3H), 7.06 (d, *J* = 4.6 Hz, 2H), 3.82 (s, 2H), 2.43 (q, *J* = 13.5 Hz, 2H), 2.07 – 1.93 (m, 2H), 1.59 (s, 3H), 1.35 (s, 9H), 1.29 – 1.19 (m, 2H), 1.03 (s, 3H).

**<sup>13</sup>C NMR** (101 MHz, CDCl<sub>3</sub>) δ 159.4, 154.8, 149.3, 147.4, 128.3, 127.3, 126.4, 122.7, 79.3, 47.3, 46.4, 34.3, 32.5, 28.4, 27.4.

**HRMS (ESI):** C<sub>24</sub>H<sub>32</sub>N<sub>2</sub>O<sub>2</sub>H<sup>+</sup> [M+H]<sup>+</sup> Calcd 381.2537, Found 381.2540.

**tert-butyl 4-(2-(4-(((2R,5S)-2-isopropyl-5-methylcyclohexyl) oxy) carbonyl) phenyl)-2-(pyridin-4-yl) ethyl) piperidine-1-carboxylate (39)**

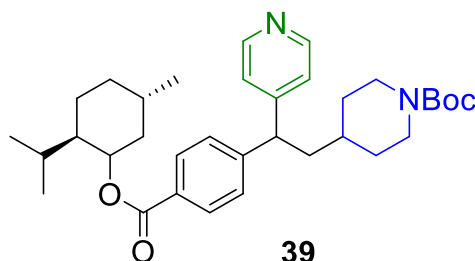

**39**

According to the general procedure 1, the product was isolated by flash chromatography (PE: EA = 1:1) as a colorless oil in 89.8 mg, 82% yield.

**TLC:** (SiO<sub>2</sub>): R<sub>f</sub> (PE: EA= 1: 1) = 0.5

**<sup>1</sup>H NMR** (400 MHz, CDCl<sub>3</sub>) δ 8.49 – 8.37 (m, 2H), 7.92 (d, *J* = 8.4 Hz, 2H), 7.22 (d, *J* = 7.8 Hz, 2H), 7.08 (d, *J* = 8.0 Hz, 2H), 4.84 (td, *J* = 10.9, 4.4 Hz, 1H), 4.02 (t, *J* = 8.1 Hz, 3H), 2.48 (s, 2H), 2.15 (s, 1H), 2.05 – 1.84 (m, 4H), 1.69 – 1.61 (m, 3H), 1.52 – 1.42 (m, 2H), 1.37 (s, 9H), 1.21 – 1.18 (m, 1H), 1.14 – 0.94 (m, 5H), 0.85 – 0.82 (m, 6H), 0.71 (d, *J* = 7.0 Hz, 3H).

**<sup>13</sup>C NMR** (101 MHz, CDCl<sub>3</sub>) δ 165.7, 154.8, 148.6, 147.2, 130.3, 129.8, 127.9, 123.5, 79.4, 74.9, 47.5, 47.2, 41.6, 41.0, 34.3, 33.4, 31.4, 28.5, 26.5, 24.9, 23.5, 22.1, 20.8, 16.5.

**HRMS (ESI):** C<sub>34</sub>H<sub>48</sub>N<sub>2</sub>O<sub>4</sub>H<sup>+</sup> [M+H]<sup>+</sup> Calcd 549.3687, Found 549.3683.

**tert-butyl 4-(2-(4-(((3S,8R,9S,10S,13S,14S)-10,13-dimethyl-17-oxohexadecahydro-1H-cyclopenta[a]phenanthren-3-yl) oxy) carbonyl) phenyl)-2-(pyridin-4-yl) ethyl) piperidine-1-carboxylate (40)**

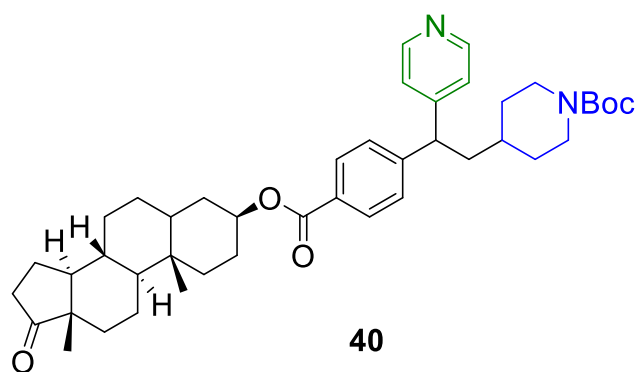

According to the general procedure 1, the product was isolated by flash chromatography (PE: EA = 1:1) as a colorless oil in 74.2 mg, 30% yield.

**TLC:** (SiO<sub>2</sub>): R<sub>f</sub> (PE: EA= 1: 1) = 0.5

**<sup>1</sup>H NMR** (400 MHz, CDCl<sub>3</sub>) δ 8.43 (d, *J* = 6.3 Hz, 2H), 7.91 (d, *J* = 8.4 Hz, 2H), 7.21 (d, *J* = 6.6 Hz, 2H), 7.07 (d, *J* = 6.0 Hz, 2H), 4.90 – 4.82 (m, 1H), 4.10 – 3.90 (m, 3H), 3.90 – 3.69 (m, 1H), 2.41 – 2.34 (m, 1H), 2.04 – 1.83 (m, 7H), 1.77 – 1.52 (m, 9H), 1.51 – 1.44 (m, 2H), 1.44 – 1.41 (m, 2H), 1.37 (s, 9H), 1.31 – 1.22 (m, 4H), 1.11 – 0.90 (m, 4H), 0.82 (s, 3H), 0.80 (s, 3H), 0.72 – 0.63 (m, 1H).

**<sup>13</sup>C NMR** (101 MHz, CDCl<sub>3</sub>) δ 165.8, 154.8, 153.2, 149.9, 147.7, 130.1, 129.6, 127.8, 123.1, 79.4, 74.2, 68.1, 54.3, 51.4, 47.8, 47.4, 46.3, 44.7, 41.6, 36.7, 35.9, 35.7, 35.0, 34.0, 33.4, 32.3, 31.5, 30.8, 28.5, 28.3, 27.5, 21.8, 20.5, 13.8, 12.3.

**HRMS (ESI):** C<sub>43</sub>H<sub>58</sub>N<sub>2</sub>O<sub>5</sub>H<sup>+</sup> [M+H]<sup>+</sup> Calcd 683.4418, Found 683.4412.

**tert-butyl 4-(2-(4-(((2-(4-isobutylphenyl) propanoyl) oxy) methyl) phenyl)-2-(pyridin-4-yl) ethyl) piperidine-1-carboxylate (41)**

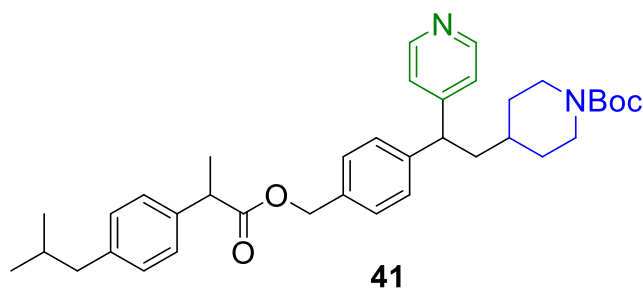

According to the general procedure 1, the product was isolated by flash chromatography (PE: EA = 1:1) as a colorless oil in 84.4 mg, 72% yield.

**TLC:** (SiO<sub>2</sub>): R<sub>f</sub> (PE: EA= 1: 1) = 0.5

**<sup>1</sup>H NMR** (400 MHz, CDCl<sub>3</sub>) δ 8.41 (d, *J* = 6.3 Hz, 2H), 7.13 – 7.04 (m, 8H), 7.00 (d, *J* = 8.1 Hz, 2H), 5.03 – 4.95 (m, 2H), 4.04 (s, 1H), 3.93 (t, *J* = 8.0 Hz, 2H), 3.66 (q, *J* = 7.2 Hz, 1H), 2.50 (s, 2H), 2.36 (d, *J* = 7.1 Hz, 2H), 1.94 – 1.82 (m, 2H), 1.81 – 1.71 (m, 1H), 1.64 – 1.51 (m, 2H), 1.42 (d, *J* = 7.1 Hz, 3H), 1.37 (s, 9H), 1.26 – 1.21 (m, 1H), 1.11 – 1.00 (m, 2H), 0.82 (d, *J* = 6.6 Hz, 6H).

**<sup>13</sup>C NMR** (101 MHz, CDCl<sub>3</sub>) δ 174.6, 154.8, 154.5, 149.2, 142.3, 140.6, 137.6, 134.9, 129.3, 128.2, 127.9, 127.2, 123.3, 79.4, 65.9, 47.1, 45.1, 45.0, 41.8, 33.3, 30.2, 28.5, 22.4, 18.5.

**HRMS (ESI):** C<sub>37</sub>H<sub>48</sub>N<sub>2</sub>O<sub>4</sub>H<sup>+</sup> [M+H]<sup>+</sup> Calcd 585.3687, Found 585.3685.

**tert-butyl 4-(2-(4-(((5-(2,5-dimethylphenoxy)-2,2-dimethylpentanoyl) oxy) methyl) phenyl)-2-(pyridin-4-yl) ethyl) piperidine-1-carboxylate (42)**

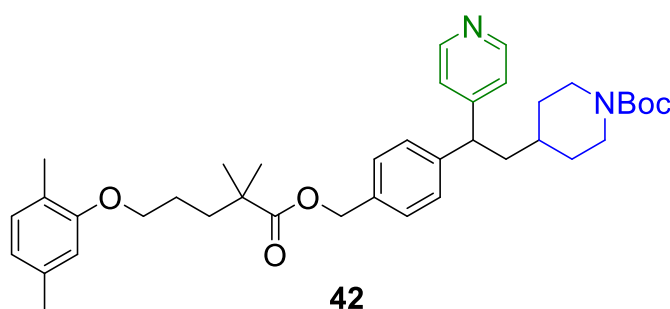

According to the general procedure 1, the product was isolated by flash chromatography (PE: EA = 1:1) as a colorless oil in 90.0 mg, 71% yield.

**TLC:** (SiO<sub>2</sub>): R<sub>f</sub> (PE: EA= 1: 1) = 0.5

**<sup>1</sup>H NMR** (400 MHz, CDCl<sub>3</sub>) δ 8.40 (d, *J* = 6.0 Hz, 2H), 7.20 (d, *J* = 8.3 Hz, 2H), 7.10 (d, *J* = 8.1 Hz, 2H), 7.05 (d, *J* = 6.3 Hz, 2H), 6.91 (d, *J* = 7.5 Hz, 1H), 6.57 (d, *J* = 7.5 Hz, 1H), 6.50 (d, *J* = 1.5 Hz, 1H), 4.99 (s, 2H), 3.93 (t, *J* = 8.0 Hz, 3H), 3.79 (t, *J* = 5.6 Hz, 2H), 2.47 (s, 2H), 2.22 (s, 3H), 2.05 (s, 3H), 1.90 – 1.84 (m, 2H), 1.69 – 1.53 (m, 6H), 1.36 (s, 9H), 1.18 (d, *J* = 5.8 Hz, 1H), 1.15 (s, 6H), 1.12 – 1.00 (m, 2H).

**<sup>13</sup>C NMR** (101 MHz, CDCl<sub>3</sub>) δ 177.6, 156.9, 154.8, 153.6, 149.9, 142.7, 136.5, 135.0, 130.3, 128.2, 127.9, 123.5, 123.2, 120.7, 111.9, 79.3, 67.8, 65.7, 47.1, 42.2, 41.8, 37.1, 33.4, 32.2, 29.7, 28.5, 25.2, 24.9, 21.5, 15.8.

**HRMS (ESI):** C<sub>39</sub>H<sub>52</sub>N<sub>2</sub>O<sub>5</sub>Na<sup>+</sup> [M+Na]<sup>+</sup> Calcd 651.3768, Found 651.3774.

**tert-butyl (E)-4-(2-(pyridin-4-yl)-2-(4-(((3,7,11,15-tetramethylhexadec-2-en-1-yl) oxy) carbonyl) phenyl) ethyl) piperidine-1-carboxylate (43)**

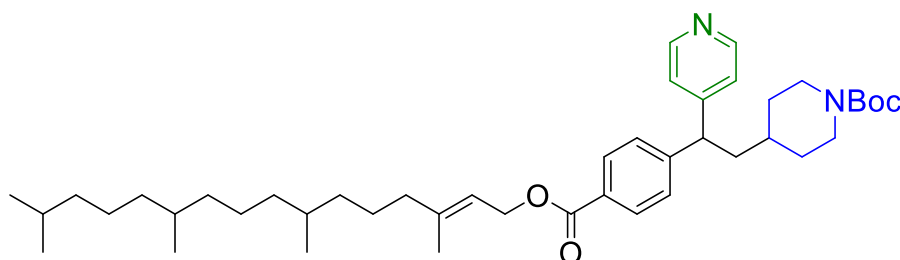

**43**

According to the general procedure 1, the product was isolated by flash chromatography (PE: EA = 1:1) as a colorless oil in 47.0 mg, 34% yield.

**TLC:** (SiO<sub>2</sub>): R<sub>f</sub> (PE: EA= 1: 1) = 0.5

**<sup>1</sup>H NMR** (400 MHz, CDCl<sub>3</sub>) δ 8.43 (s, 2H), 7.92 (d, *J* = 8.5 Hz, 2H), 7.22 – 7.19 (m, 2H), 7.06 (d, *J* = 6.3 Hz, 2H), 5.39 – 5.34 (m, 1H), 4.75 (d, *J* = 7.1 Hz, 2H), 4.03 – 3.99 (m, 3H), 2.47 (s, 2H), 1.97 – 1.87 (m, 4H), 1.67 (s, 3H), 1.62 – 1.48 (m, 2H), 1.47 – 1.39 (m, 2H), 1.37 (s, 9H), 1.33 – 1.23 (m, 4H), 1.22 – 1.12 (m, 8H), 1.12 – 1.04 (m, 4H), 1.04 – 0.92 (m, 4H), 0.82 – 0.72 (m, 12H).

**<sup>13</sup>C NMR** (101 MHz, CDCl<sub>3</sub>) δ 166.3, 154.8, 153.0, 150.0, 147.8, 143.0, 130.2, 129.3, 127.8, 123.1, 118.0, 79.4, 62.0, 47.3, 41.6, 39.9, 39.4, 37.4, 37.4, 37.3, 36.6, 33.4, 32.8, 32.7, 32.3, 28.5, 28.0, 25.0, 24.8, 24.5, 22.8, 22.7, 19.8, 19.7, 16.5.

**HRMS (ESI):** C<sub>44</sub>H<sub>68</sub>N<sub>2</sub>O<sub>4</sub>H<sup>+</sup> [M+H]<sup>+</sup> Calcd 689.5252, Found 689.5249.

**tert-butyl 3-(2-(4-(((8R,9S,13S,14S)-13-methyl-17-oxo-7,8,9,11,12,13,14,15,16,17-decahydro-6H-cyclopenta[a]phenanthren-3-yl) oxy) carbonyl) phenyl)-2-(pyridin-4-yl) ethyl) piperidine-1-carboxylate (44)**

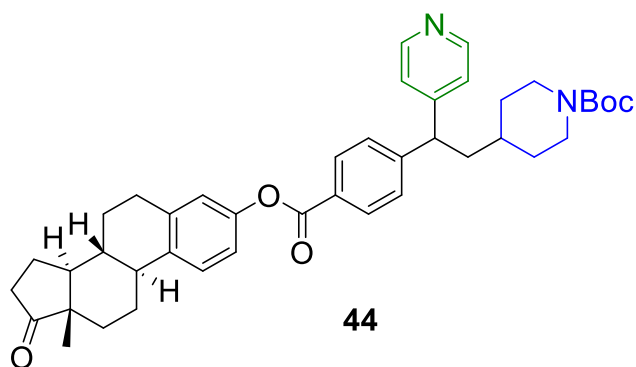

According to the general procedure 1, the product was isolated by flash chromatography (PE: EA = 1:1) as a colorless oil in 74.2 mg, 56% yield.

**TLC:** (SiO<sub>2</sub>): R<sub>f</sub> (PE: EA= 1: 1) = 0.5

**<sup>1</sup>H NMR** (400 MHz, CDCl<sub>3</sub>) δ 8.45 (s, 2H), 8.07 (d, *J* = 8.4 Hz, 2H), 7.30 – 7.25 (m, 3H), 7.10 (d, *J* = 6.0 Hz, 2H), 6.90 – 6.82 (m, 2H), 4.10 – 3.97 (m, 3H), 2.88 – 2.84 (m, 2H), 2.48 – 2.33 (m, 3H), 2.28 – 2.18 (m, 1H), 2.13 – 1.99 (m, 2H), 1.97 (s, 3H), 1.94 – 1.86 (m, 2H), 1.62 – 1.49 (m, 4H), 1.49 – 1.40 (m, 4H), 1.37 (s, 9H), 1.26 – 1.21 (m, 1H), 1.11 – 1.05 (m, 2H), 0.84 (s, 3H).

**<sup>13</sup>C NMR** (101 MHz, CDCl<sub>3</sub>) δ 171.2, 165.1, 154.8, 152.9, 150.0, 148.7, 138.1, 137.5, 130.8, 128.4, 128.1, 126.5, 123.1, 121.7, 118.8, 79.4, 60.4, 50.4, 48.0, 47.4, 44.2, 41.6, 38.0, 35.9, 33.5, 32.3, 31.5, 29.7, 29.4, 28.5, 26.3, 25.8, 21.6, 21.1, 14.2, 13.8.

**HRMS (ESI):** C<sub>42</sub>H<sub>50</sub>N<sub>2</sub>O<sub>5</sub>H<sup>+</sup> [M+H]<sup>+</sup> Calcd 663.3792, Found 663.3787.

**tert-butyl 3-(2-phenyl-2-(pyridin-4-yl) ethyl) pyrrolidine-1-carboxylate (45)**

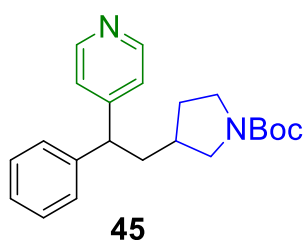

According to the general procedure 1, the product was isolated by flash chromatography (PE: EA = 1:1) as a pale yellow oil in 50.1 mg, 84% yield.

**TLC:** (SiO<sub>2</sub>): R<sub>f</sub> (PE: EA= 1: 1) = 0.5

**<sup>1</sup>H NMR** (400 MHz, CDCl<sub>3</sub>) δ 8.42 (d, *J* = 5.8 Hz, 2H), 7.27 – 7.11 (m, 5H), 7.09 (d, *J* = 6.4 Hz, 2H), 3.84 – 3.79 (m, 1H), 3.55 – 3.28 (m, 2H), 3.16 – 3.02 (m, 1H), 2.96 – 2.74 (m, 1H), 2.15 – 1.99 (m, 2H), 1.96 – 1.79 (m, 2H), 1.52 – 1.40 (m, 1H), 1.36 (s, 9H).

**<sup>13</sup>C NMR** (101 MHz, CDCl<sub>3</sub>) δ 154.5, 153.6, 149.9, 142.6, 128.9, 127.8, 127.0, 123.0, 79.1,

51.5, 51.0, 49.3, 45.6, 45.3, 38.5, 36.9, 35.9, 31.8, 31.0, 28.5.

**HRMS (ESI):** C<sub>22</sub>H<sub>28</sub>N<sub>2</sub>O<sub>2</sub>H<sup>+</sup> [M+H]<sup>+</sup> Calcd 353.2224, Found 353.2222.

#### 4-(2-cyclohexyl-1-phenylethyl) pyridine (46)

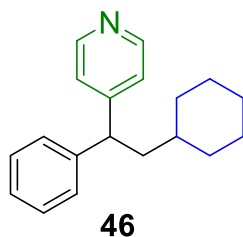

According to the general procedure 1, the product was isolated by flash chromatography (PE: EA = 4:1) as a colorless oil in 37.6 mg, 71% yield.

**TLC:** (SiO<sub>2</sub>): R<sub>f</sub> (PE: EA= 4: 1) = 0.4

**<sup>1</sup>H NMR** (400 MHz, CDCl<sub>3</sub>) δ 8.40 (d, *J* = 4.5 Hz, 2H), 7.25 – 7.19 (m, 2H), 7.16 – 7.10 (m, 3H), 7.08 (d, *J* = 6.0 Hz, 2H), 3.96 (t, *J* = 8.0 Hz, 1H), 1.83 (td, *J* = 7.6, 3.2 Hz, 2H), 1.73 – 1.62 (m, 2H), 1.60 – 1.50 (m, 2H), 1.56 – 1.52 (m, 1H), 1.11 – 0.96 (m, 4H), 0.93 – 0.80 (m, 2H).

**<sup>13</sup>C NMR** (101 MHz, CDCl<sub>3</sub>) δ 154.4, 149.8, 143.4, 128.7, 127.9, 126.6, 123.4, 47.5, 42.8, 34.8, 33.4, 33.3, 26.5, 26.1, 26.1.

**HRMS (ESI):** C<sub>19</sub>H<sub>23</sub>NH<sup>+</sup> [M + H]<sup>+</sup> Calcd 266.1903, found, 266.1901<sup>[2]</sup>

#### 4-(3,3-dimethyl-1-phenylbutyl) pyridine (47)

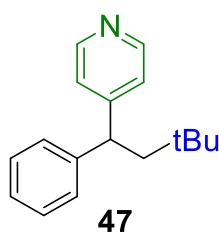

According to the general procedure 1, the product was isolated by flash chromatography (PE: EA = 4:1) as a colorless oil in 34.7 mg, 72% yield.

**TLC:** (SiO<sub>2</sub>): R<sub>f</sub> (PE: EA= 4: 1) = 0.4

**<sup>1</sup>H NMR** (400 MHz, CDCl<sub>3</sub>) δ 8.39 (d, *J* = 5.8 Hz, 2H), 7.20 (d, *J* = 6.4 Hz, 4H), 7.18 – 7.15 (m, 2H), 7.13 – 7.08 (m, 1H), 3.95 (t, *J* = 6.6 Hz, 1H), 2.07 – 1.96 (m, 2H), 0.76 (s, 9H).

**<sup>13</sup>C NMR** (101 MHz, CDCl<sub>3</sub>) δ 155.6, 149.8, 144.8, 128.7, 127.8, 126.5, 123.2, 48.7, 47.9, 31.6, 30.2.

**HRMS (ESI):** C<sub>17</sub>H<sub>21</sub>NH<sup>+</sup> [M + H]<sup>+</sup> Calcd 240.1747; found, 240.1745<sup>[2]</sup>



#### 4-(1-phenylpropyl) pyridine (48)

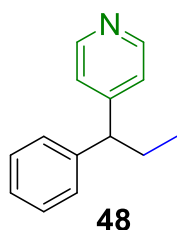

According to the general procedure 1, the product was isolated by flash chromatography (PE: EA = 4:1) as a colorless oil in 22.7 mg, 58% yield.

**TLC:** (SiO<sub>2</sub>): R<sub>f</sub> (PE: EA= 4: 1) = 0.4

**<sup>1</sup>H NMR** (400 MHz, CDCl<sub>3</sub>) δ 8.42 (d, *J* = 5.9 Hz, 2H), 7.26 – 7.20 (m, 2H), 7.17 – 7.12 (m, 3H), 7.12 – 7.09 (m, 2H), 3.71 (t, *J* = 7.8 Hz, 1H), 2.04 – 1.97 (m, 2H), 0.83 (t, *J* = 7.3 Hz, 3H).

**<sup>13</sup>C NMR** (101 MHz, CDCl<sub>3</sub>) δ 154.6, 149.3, 143.0, 128.7, 127.9, 126.7, 123.5, 52.7, 27.9, 12.6.

**HRMS (ESI):** C<sub>14</sub>H<sub>15</sub>NH<sup>+</sup> [M + H]<sup>+</sup> Calcd 198.1277, found, 198.1277.<sup>[2]</sup>

#### 4-(3-methyl-1-phenylbutyl) pyridine (49)

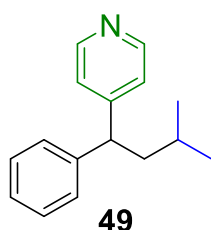

According to the general procedure 1, the product was isolated by flash chromatography (PE: EA = 4:1) as a colorless oil in 29.2 mg, 65% yield.

**TLC:** (SiO<sub>2</sub>): R<sub>f</sub> (PE: EA= 4: 1) = 0.4

**<sup>1</sup>H NMR** (400 MHz, CDCl<sub>3</sub>) δ 8.42 (d, *J* = 5.8 Hz, 2H), 7.27 – 7.14 (m, 5H), 7.12 (s, 2H), 3.93 (t, *J* = 8.0 Hz, 1H), 1.92 – 1.77 (m, 2H), 1.41 – 1.31 (m, 1H), 0.86 (d, *J* = 2.3 Hz, 3H), 0.84 (d, *J* = 2.3 Hz, 3H).

**<sup>13</sup>C NMR** (101 MHz, CDCl<sub>3</sub>) δ 155.0, 149.2, 143.0, 128.7, 127.9, 126.7, 123.5, 48.4, 44.2, 25.5, 22.7, 22.4.

**HRMS (ESI):** C<sub>16</sub>H<sub>19</sub>NH<sup>+</sup> [M + H]<sup>+</sup> Calcd 226.1590, found, 226.1589<sup>[2]</sup>

#### 4-(2-(oxetan-3-yl)-1-phenylethyl) pyridine (50)

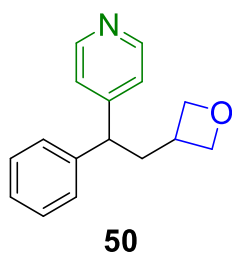

According to the general procedure 1, the product was isolated by flash chromatography (PE: EA = 3:2) as a colorless oil in 35.0 mg, 73% yield.

**TLC:** (SiO<sub>2</sub>): R<sub>f</sub> (PE: EA= 3: 2) = 0.4

**<sup>1</sup>H NMR** (400 MHz, CDCl<sub>3</sub>) δ 8.42 (d, *J* = 6.1 Hz, 2H), 7.25 – 7.07 (m, 5H), 7.05 (d, *J* = 6.3 Hz, 2H), 4.60 – 4.48 (m, 2H), 4.23 (dt, *J* = 38.5, 6.3 Hz, 2H), 3.68 (t, *J* = 7.8 Hz, 1H), 2.90 – 2.76 (m, 1H), 2.36 (t, *J* = 7.8 Hz, 2H).

**<sup>13</sup>C NMR** (101 MHz, CDCl<sub>3</sub>) δ 153.1, 150.0, 142.2, 128.9, 127.8, 127.1, 123.0, 77.2, 48.8, 38.8, 33.8.

**HRMS (ESI):** C<sub>16</sub>H<sub>17</sub>NOH<sup>+</sup> [M+H]<sup>+</sup> Calcd 240.1383, Found 240.1389.

#### 4-(1-phenyl-2-(tetrahydro-2H-pyran-4-yl) ethyl) pyridine (51)

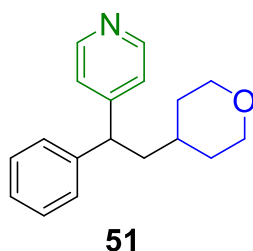

According to the general procedure 1, the product was isolated by flash chromatography (PE: EA = 3:2) as a colorless oil in 39.6.1 mg, 74% yield.

**TLC:** (SiO<sub>2</sub>): R<sub>f</sub> (PE: EA= 3: 2) = 0.4

**<sup>1</sup>H NMR** (400 MHz, CDCl<sub>3</sub>) δ 8.41 (d, *J* = 6.1 Hz, 2H), 7.22 (q, *J* = 7.9 Hz, 2H), 7.14 (t, *J* = 7.4 Hz, 3H), 7.09 (d, *J* = 6.1 Hz, 2H), 3.96 (t, *J* = 8.1 Hz, 1H), 3.87 – 3.79 (m, 2H), 3.17 (t, *J* = 11.3 Hz, 2H), 1.98 – 1.83 (m, 2H), 1.57 – 1.50 (m, 2H), 1.31 – 1.19 (m, 3H).

**<sup>13</sup>C NMR** (101 MHz, CDCl<sub>3</sub>) δ 154.1, 149.7, 142.8, 128.8, 127.8, 126.9, 123.2, 67.8, 47.1, 42.2, 33.2, 32.9, 32.4.

**HRMS (ESI):** C<sub>18</sub>H<sub>21</sub>NOH<sup>+</sup> [M+H]<sup>+</sup> Calcd 268.1696, found, 268.1693<sup>[2]</sup>

**4-(1-phenyl-2-(tetrahydrofuran-3-yl) ethyl) pyridine (52)**

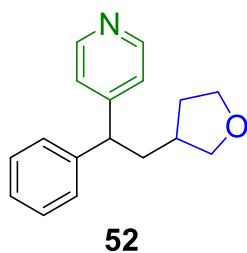

According to the general procedure 1, the product was isolated by flash chromatography (PE: EA = 3:2) as a colorless oil in 35.1 mg, 69% yield.

**TLC:** (SiO<sub>2</sub>): R<sub>f</sub> (PE: EA= 3: 2) = 0.4

**<sup>1</sup>H NMR** (400 MHz, CDCl<sub>3</sub>) δ 8.42 (d, *J* = 6.3 Hz, 2H), 7.25 (d, *J* = 7.0 Hz, 2H), 7.21 – 7.12 (m, 3H), 7.09 (d, *J* = 4.4 Hz, 2H), 3.85 – 3.70 (m, 3H), 3.65 – 3.57 (m, 1H), 3.36 – 3.24 (m, 1H), 2.13 – 2.02 (m, 2H), 2.01 – 1.86 (m, 2H), 1.54 – 1.43 (m, 1H).

**<sup>13</sup>C NMR** (101 MHz, CDCl<sub>3</sub>) δ 153.7, 149.9, 142.6, 128.9, 127.8, 127.0, 123.1, 73.2, 67.9, 49.7, 38.5, 37.2, 32.5.

**HRMS (ESI):** C<sub>17</sub>H<sub>19</sub>NOH<sup>+</sup> [M+H]<sup>+</sup> Calcd 254.1539, Found 254.1548.

## 9. Mechanistic investigation experimental procedures

### Radical trapping experiment

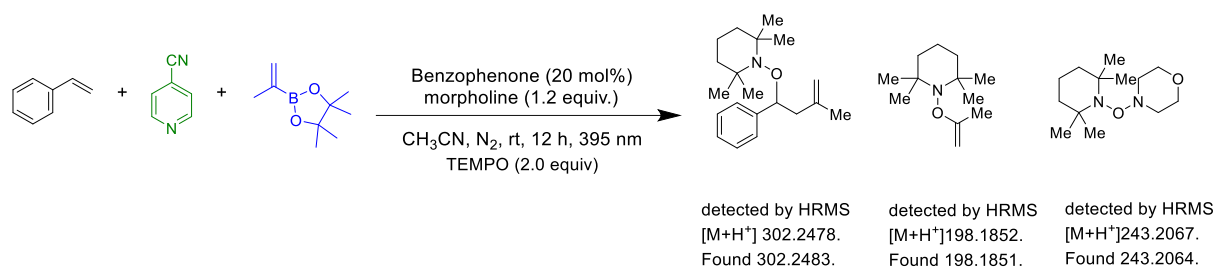

Synthesized according to general procedure 1: 4-Cyanopyridine (0.2 mmol, 1.0 equiv.), benzophenone (0.04 mmol, 0.2 equiv.), TEMPO (0.4 mmol, 2 equiv.) and Alkene (0.4 mmol, 2.0 equiv), BPin (0.2 mmol, 1equiv.) in MeCN (0.05 M, 4 mL), room temperature, 12 h, 10 W 395 nm blue LEDs.

The corresponding trapping product was detected by HRMS.

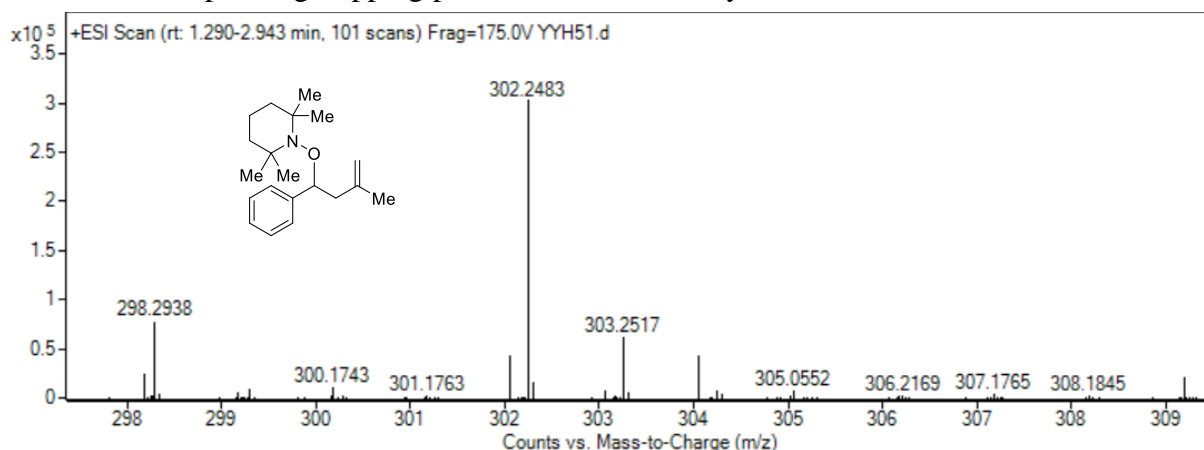

HRMS (ESI): m/z calcd. For [C<sub>20</sub>H<sub>31</sub>NO+H]<sup>+</sup>; [M+H]<sup>+</sup>: 302.2478; found: 302.2483.

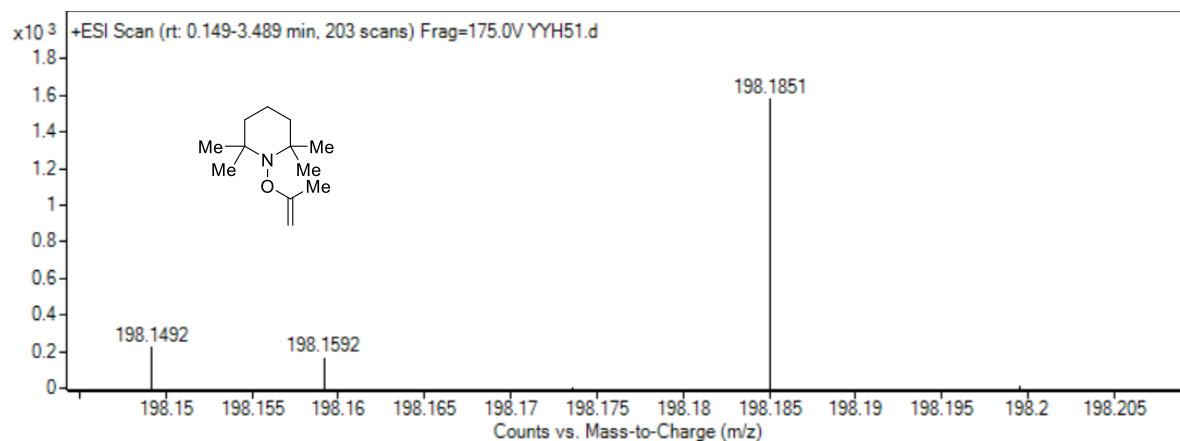

HRMS (ESI): m/z calcd. For [C<sub>12</sub>H<sub>23</sub>NO+H]<sup>+</sup>; [M+H]<sup>+</sup>: 198.1852; found: 198.1851.

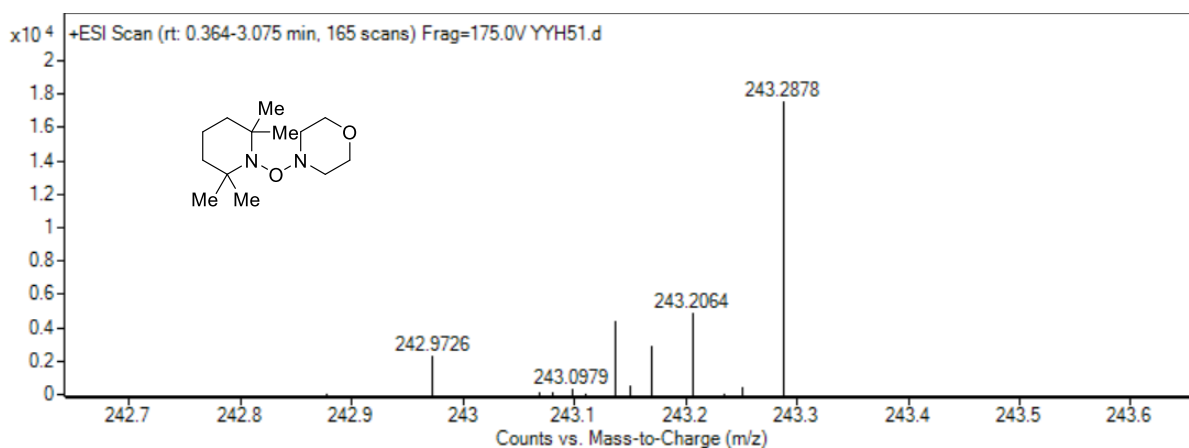

HRMS (ESI): m/z calcd. For [C<sub>13</sub>H<sub>26</sub>N<sub>2</sub>O<sub>2</sub>+H]<sup>+</sup>; [M+H]<sup>+</sup>: 243.2067; found: 243.2064.

## 10. Gram-Scale reaction

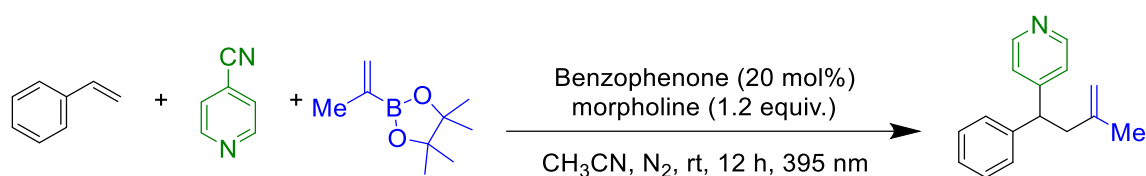

Synthesized according to General Procedure 1: 4-Cyanopyridine (5 mmol, 0.5205g, 1.0 equiv.), Benzophenone (1 mmol, 0.1825 g, 0.2 equiv.). Styrene (10 mmol, 1.16mL 2.0 equiv.), BPin (5 mmol, 0.95mL, 1.0 equiv.), morpholine (6 mmol, 0.52 mL, 1.2 equiv.) in CH<sub>3</sub>CN (0.05 M). The reaction was irradiated with 10 W 395 nm blue LEDs, at room temperature. After 12 hours, the reaction mixture was concentrated under vacuum. Purification by flash chromatography (SiO<sub>2</sub>, PE: EA=4:1) afforded **1** (0.7810 g, 70%), as a yellow liquid.as shown in the figure below:

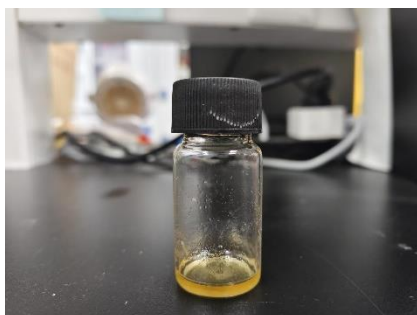

## 11. NMR Spectra of Substrates and Products

$^1\text{H}$  NMR spectra of compound **S1** (400 MHz, Chloroform-*d*)

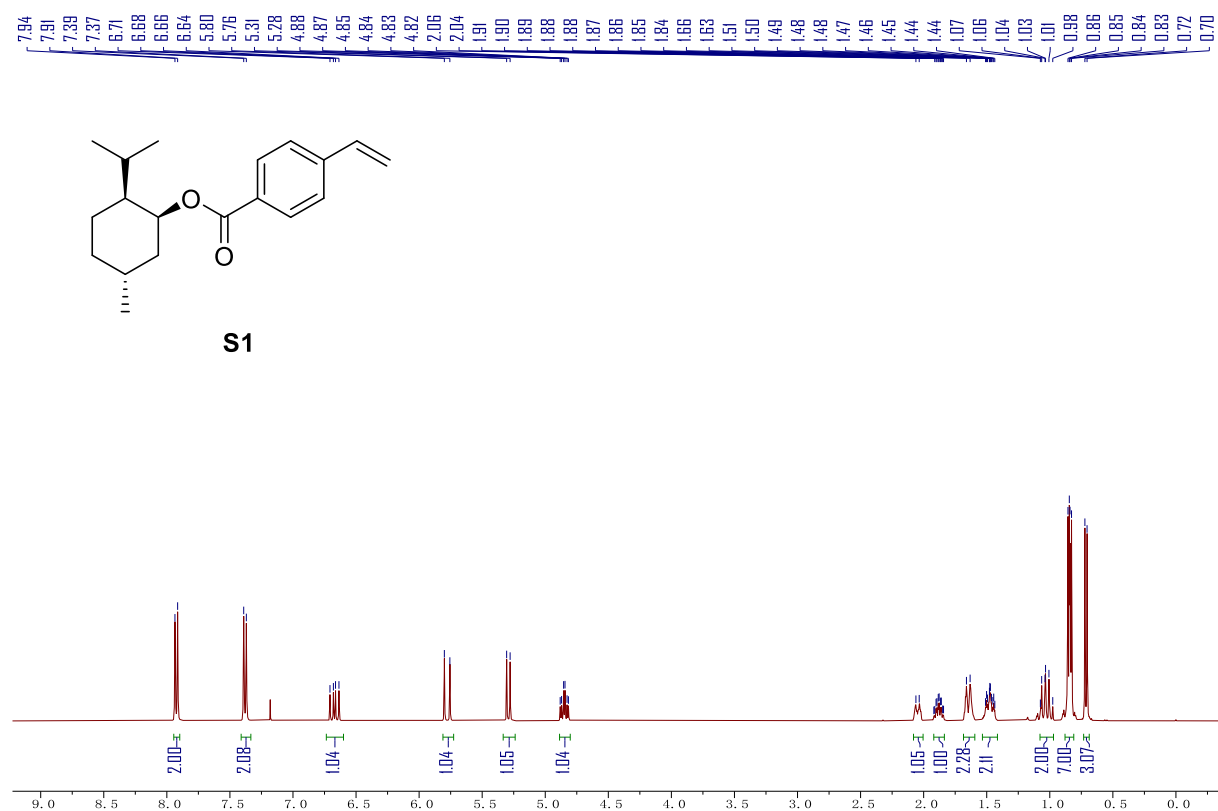

$^1\text{H}$  NMR spectra of compound **S2** (400 MHz, Chloroform-*d*)

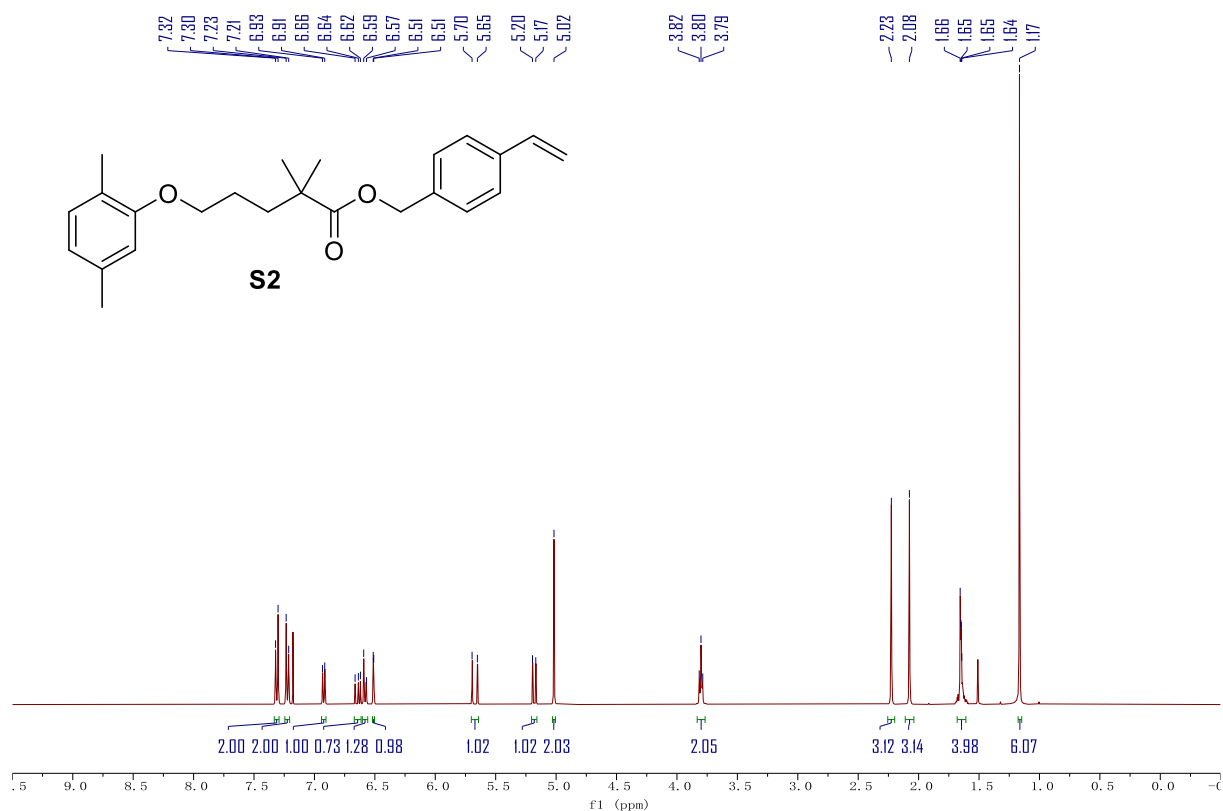

**<sup>1</sup>H NMR spectra of compound S3 (400 MHz, Chloroform-*d*)**

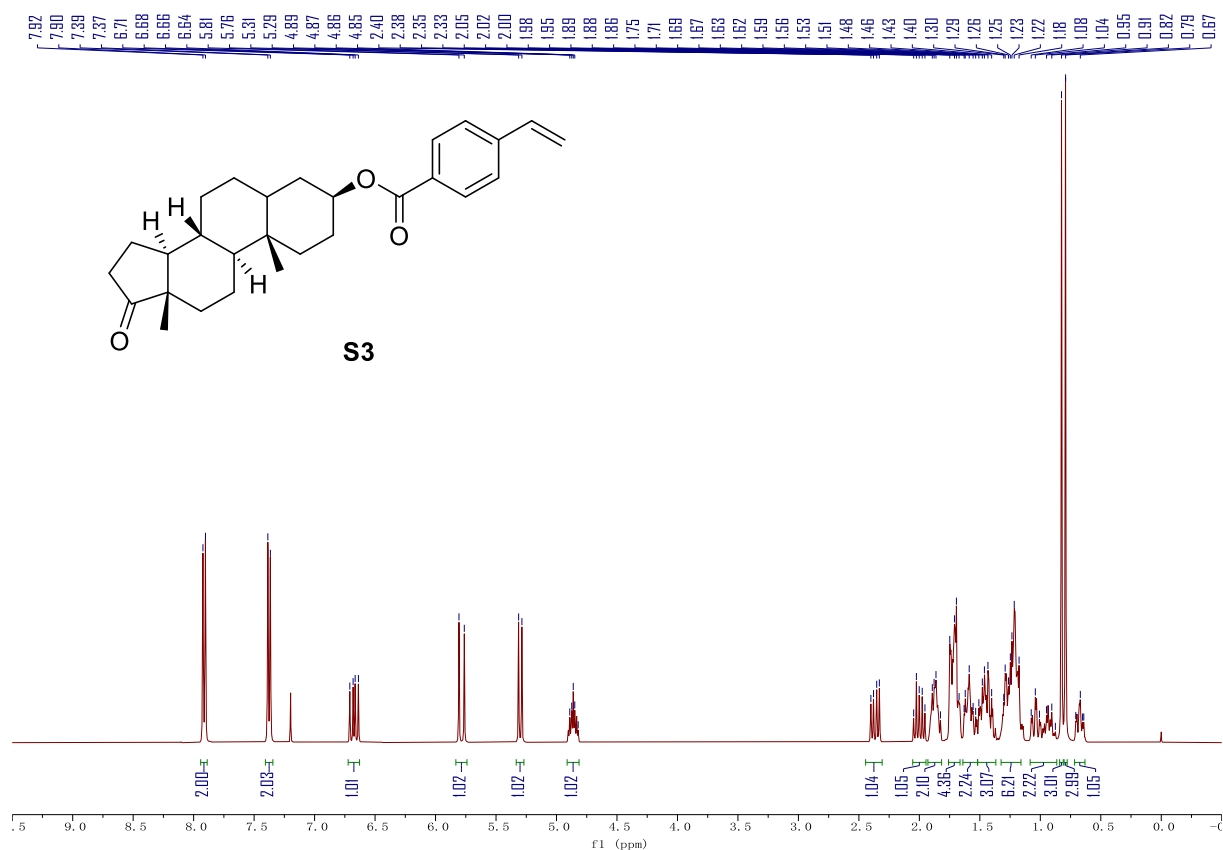

**<sup>1</sup>H NMR spectra of compound S4 (400 MHz, Chloroform-*d*)**

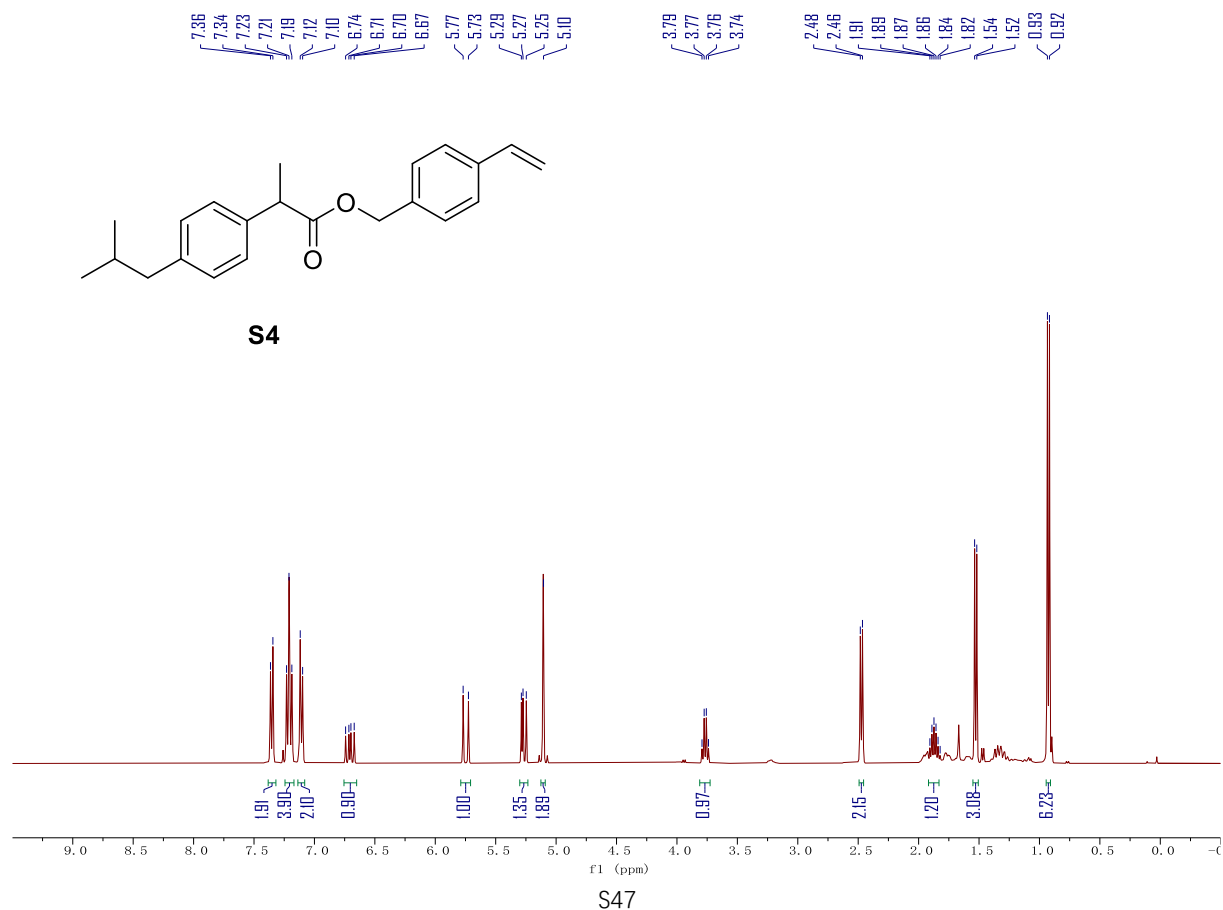

**<sup>1</sup>H NMR spectra of compound S5 (400 MHz, Chloroform-*d*)**

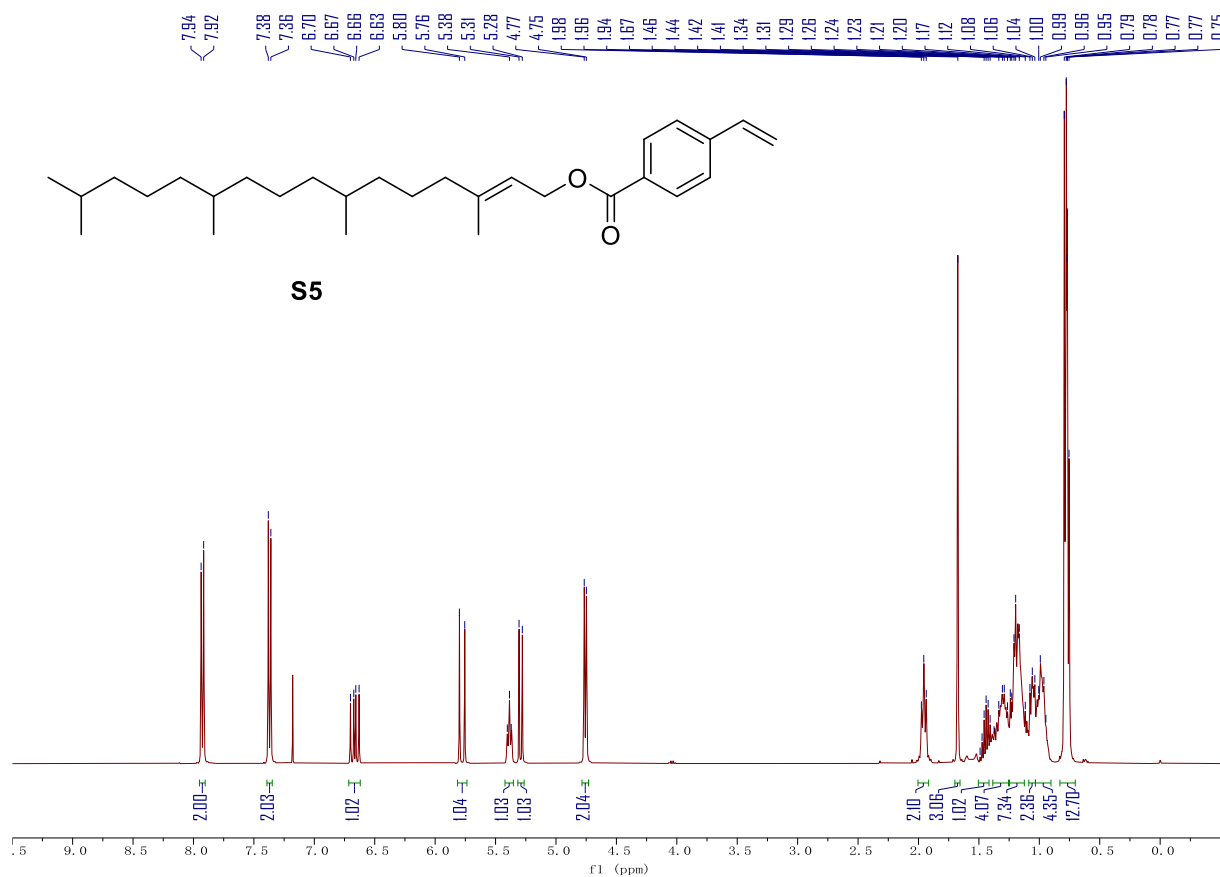

**<sup>1</sup>H NMR spectra of compound S6 (400 MHz, Chloroform-*d*)**

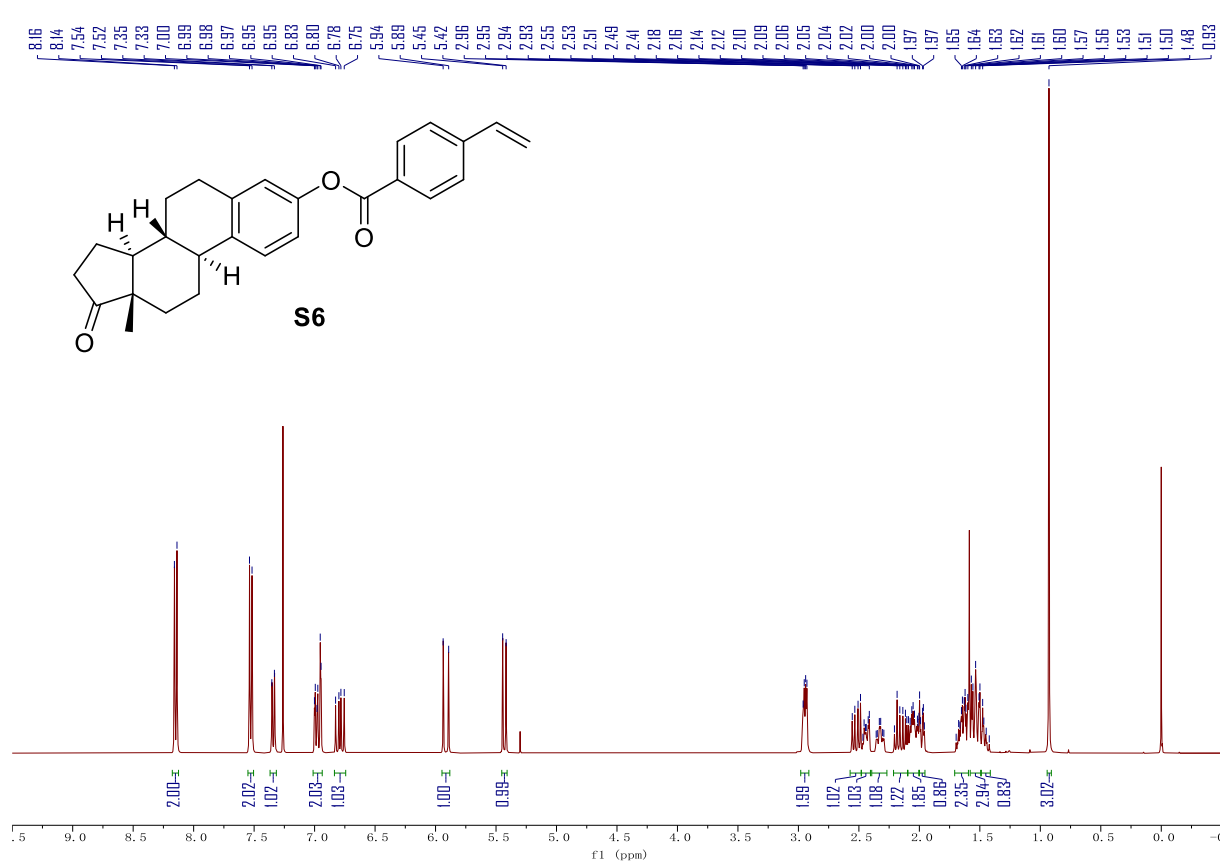



**<sup>1</sup>H NMR spectra of compound 1 (400 MHz, Chloroform-*d*)**

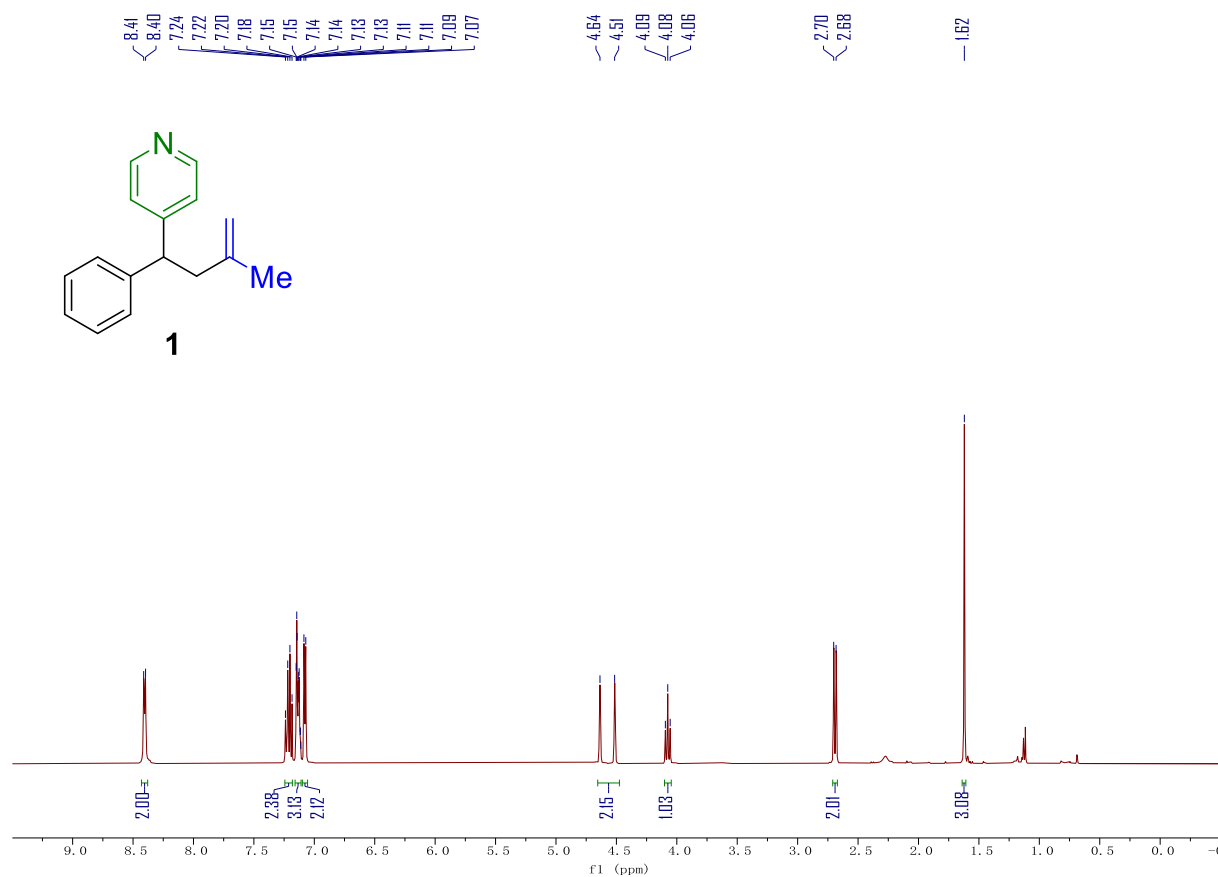

**<sup>13</sup>C NMR spectra of compound 1 (101 MHz, Chloroform-*d*)**

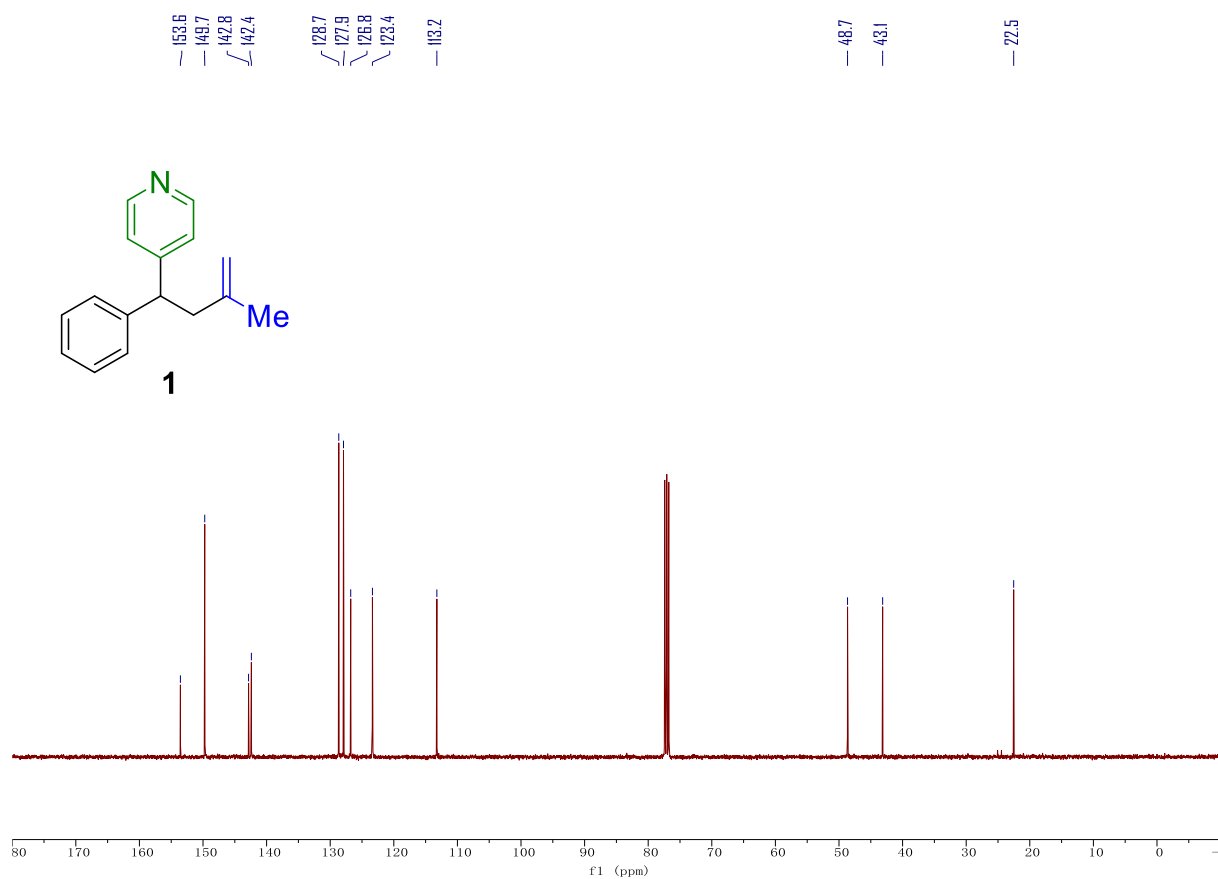

**<sup>1</sup>H NMR spectra of compound **2** (400 MHz, Chloroform-*d*)**

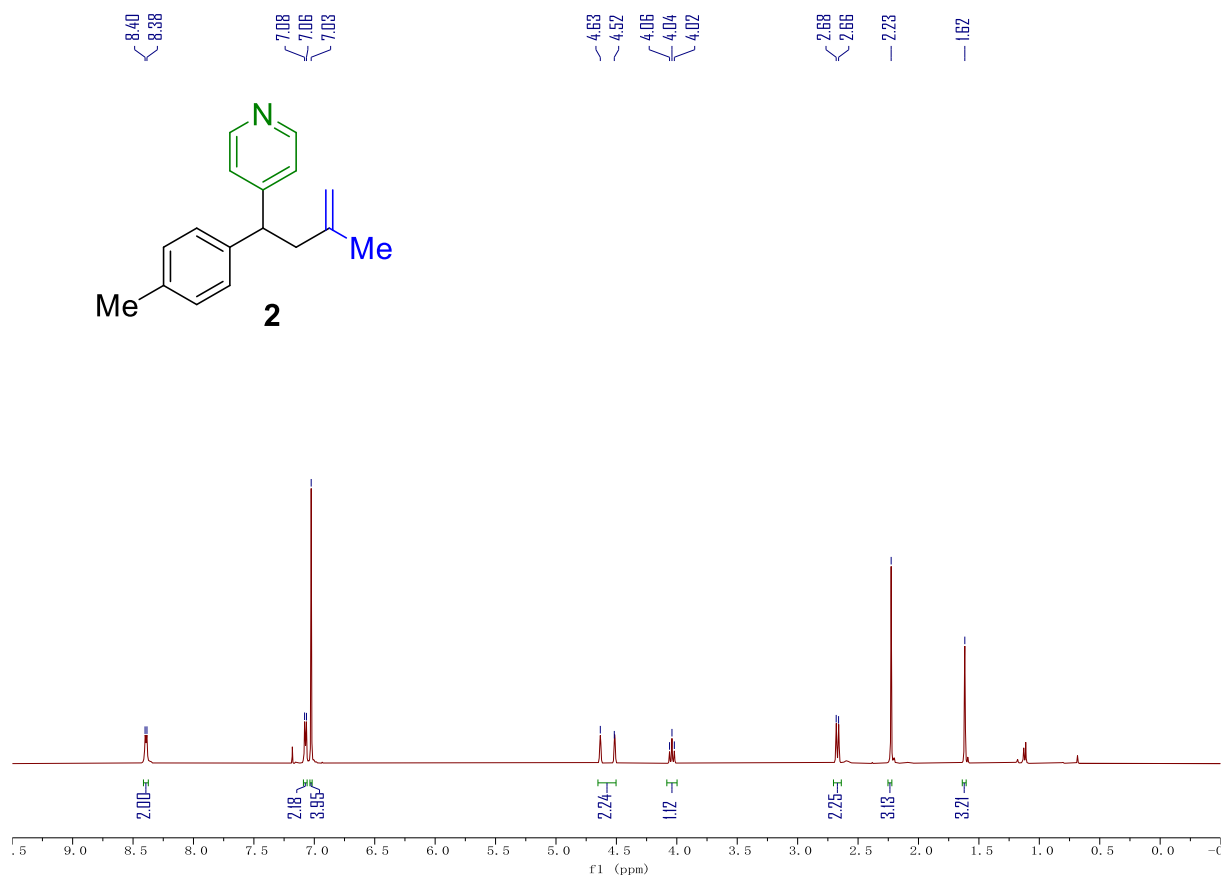

**<sup>13</sup>C NMR spectra of compound **2** (101 MHz, Chloroform-*d*)**

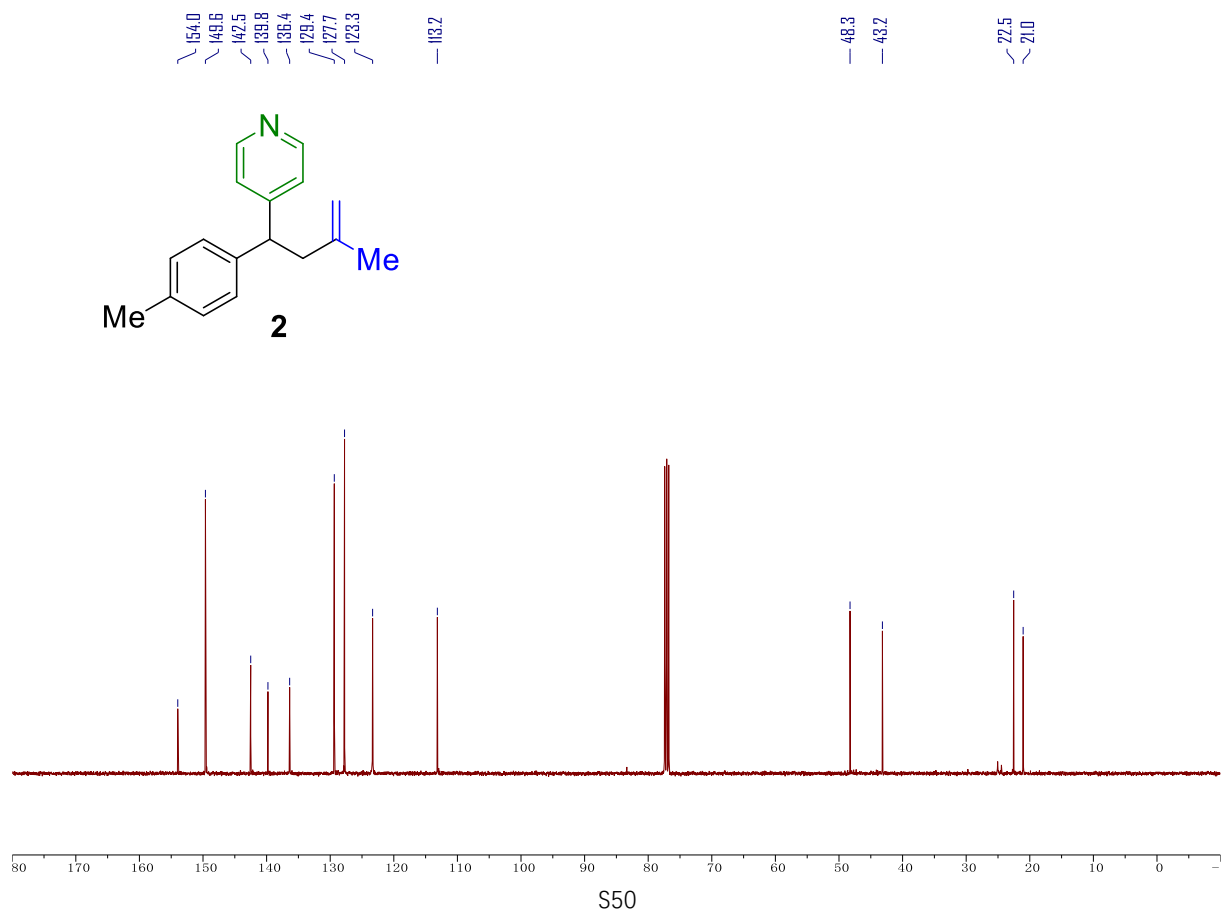

**<sup>1</sup>H NMR spectra of compound **3** (400 MHz, Chloroform-*d*)**

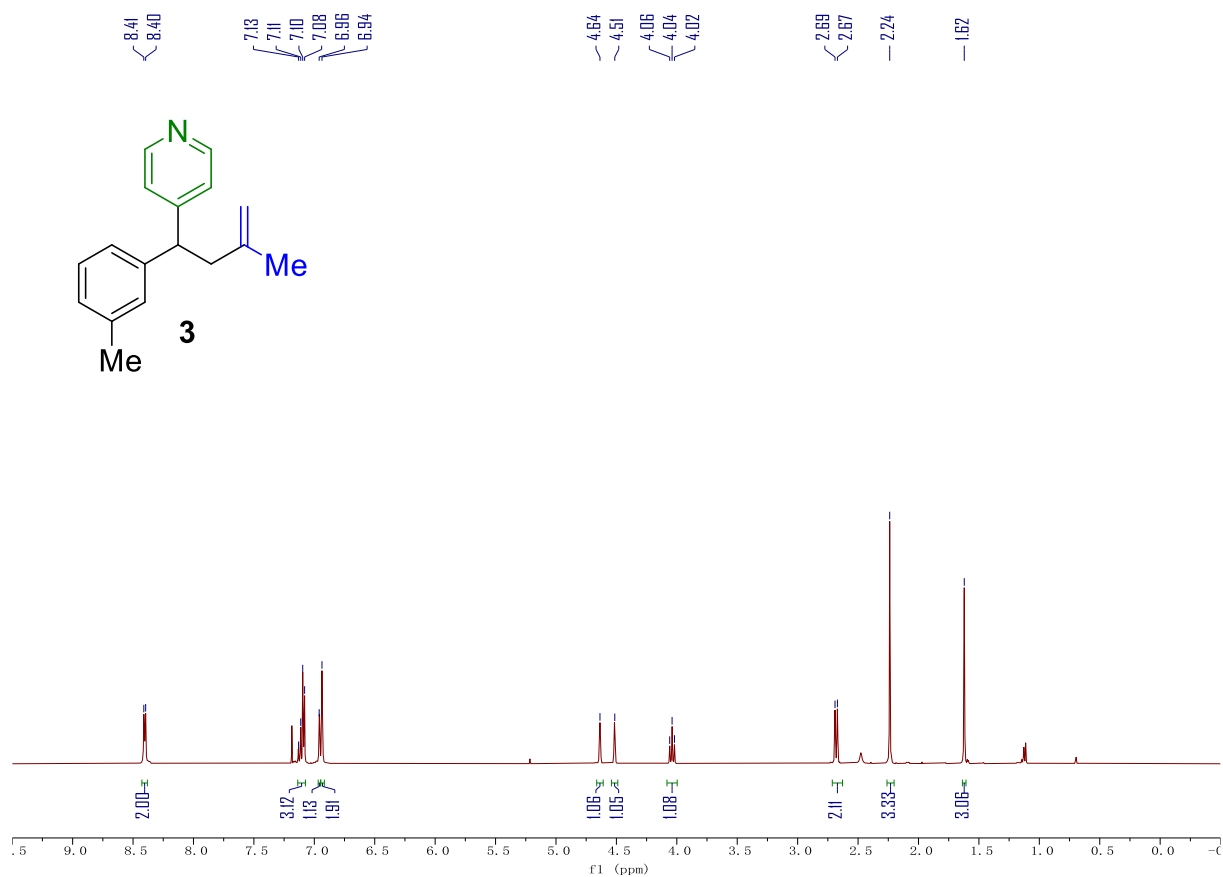

**<sup>13</sup>C NMR spectra of compound **3** (101 MHz, Chloroform-*d*)**

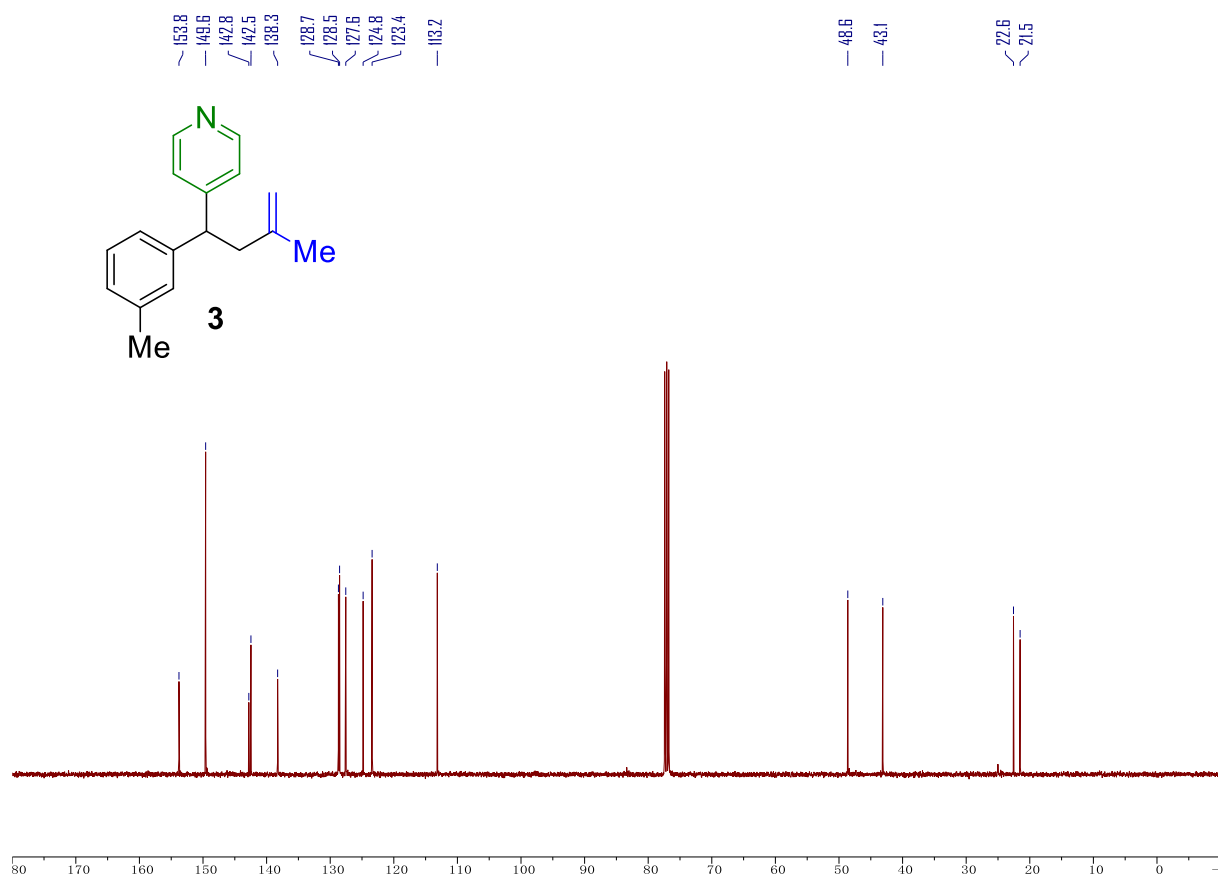

**<sup>1</sup>H NMR spectra of compound 4 (400 MHz, Chloroform-*d*)**

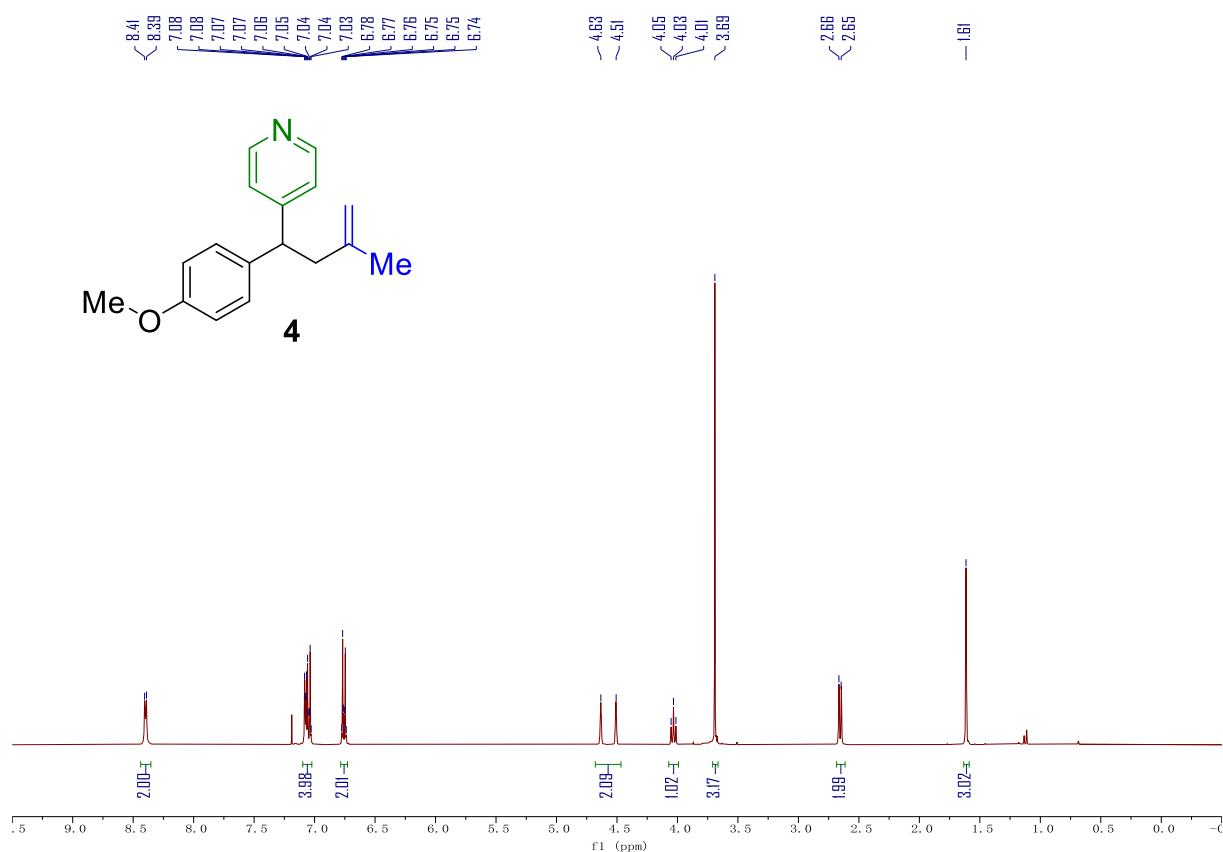

**<sup>13</sup>C NMR spectra of compound 4 (101 MHz, Chloroform-*d*)**

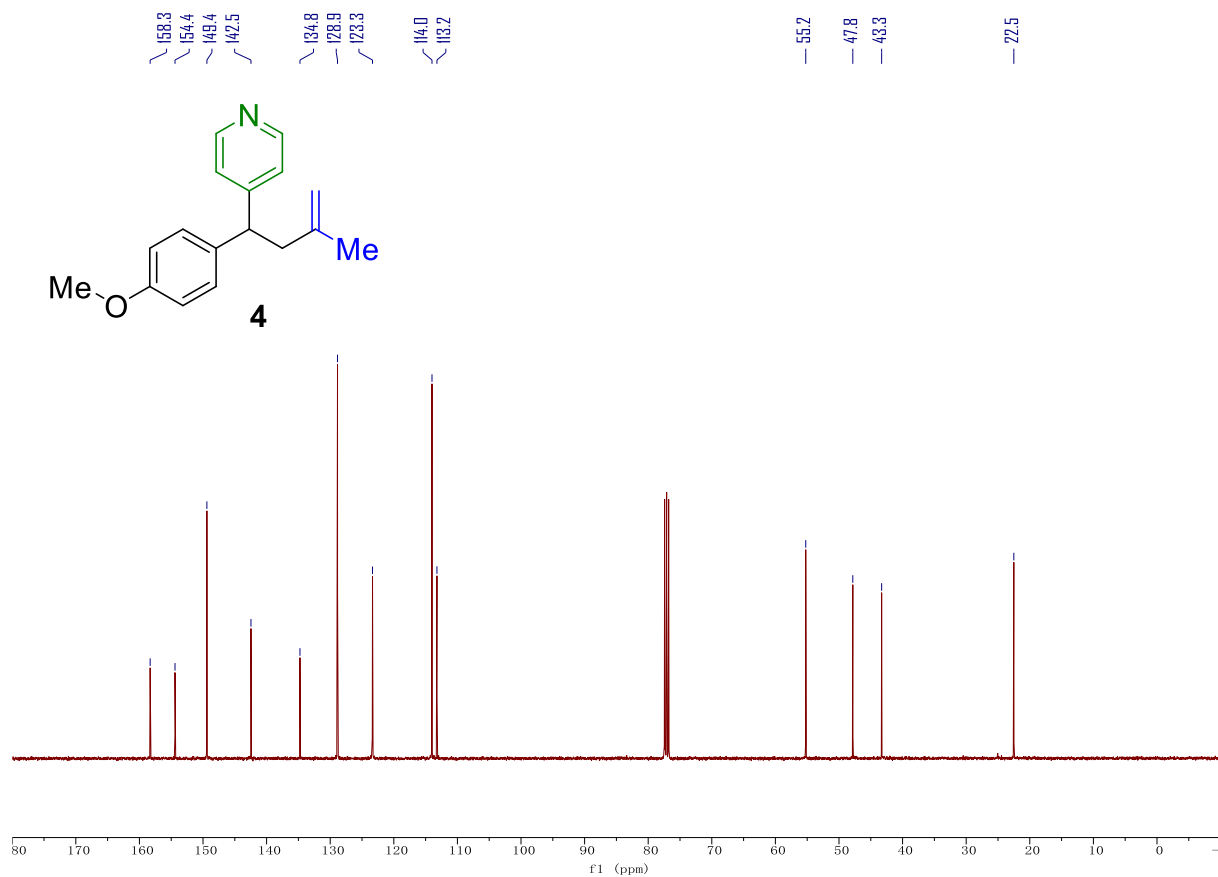

**<sup>1</sup>H NMR spectra of compound **5** (400 MHz, Chloroform-*d*)**

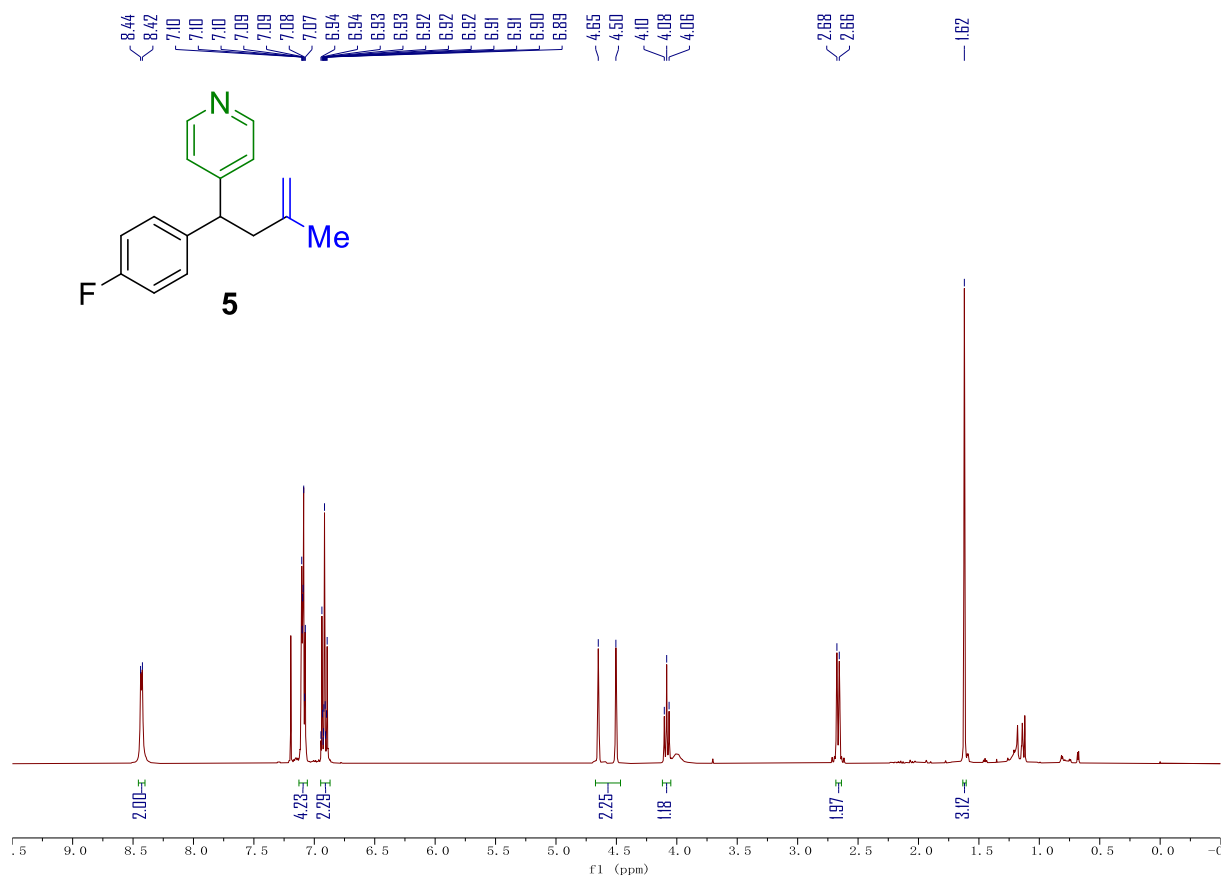

**<sup>13</sup>C NMR spectra of compound **5** (101 MHz, Chloroform-*d*)**

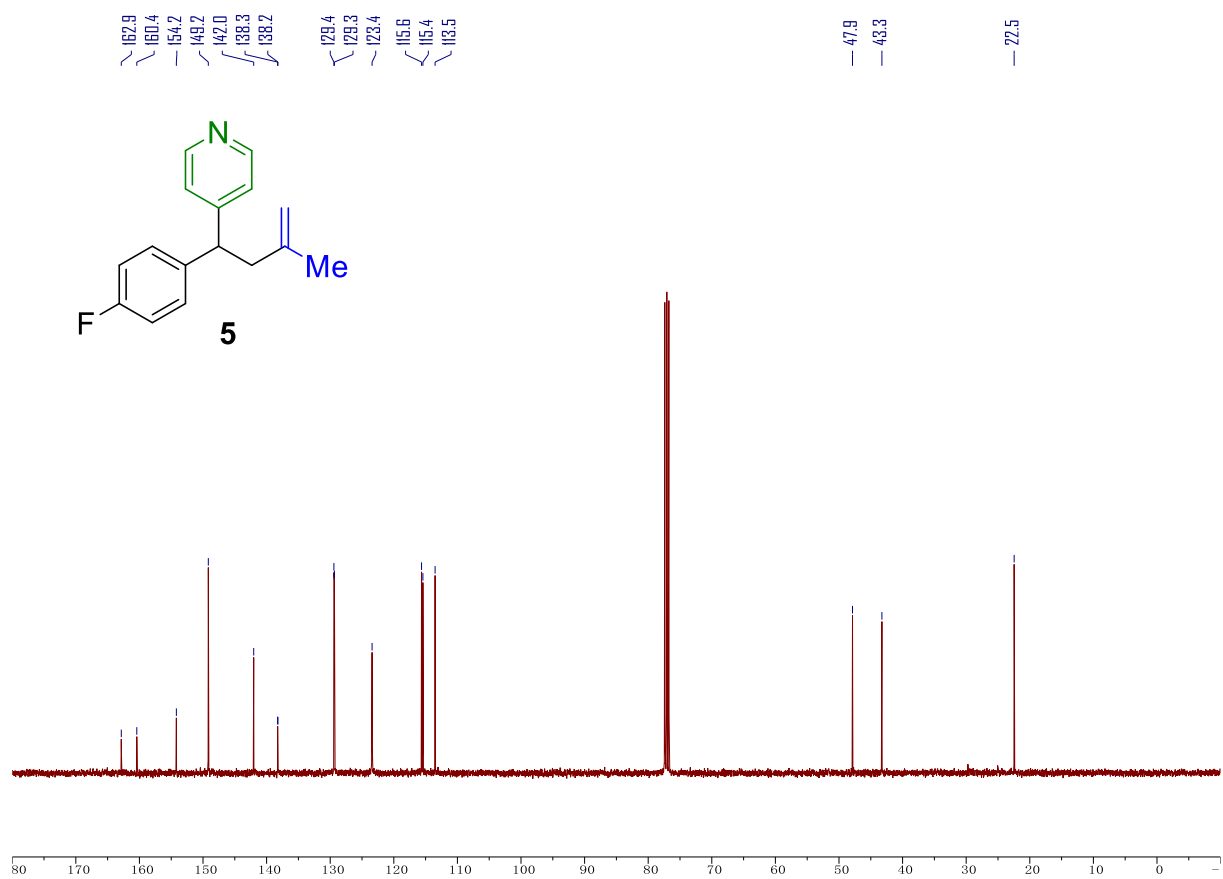

**$^{19}\text{F}$  NMR spectra of compound **5** (376 MHz, Chloroform-*d*)**

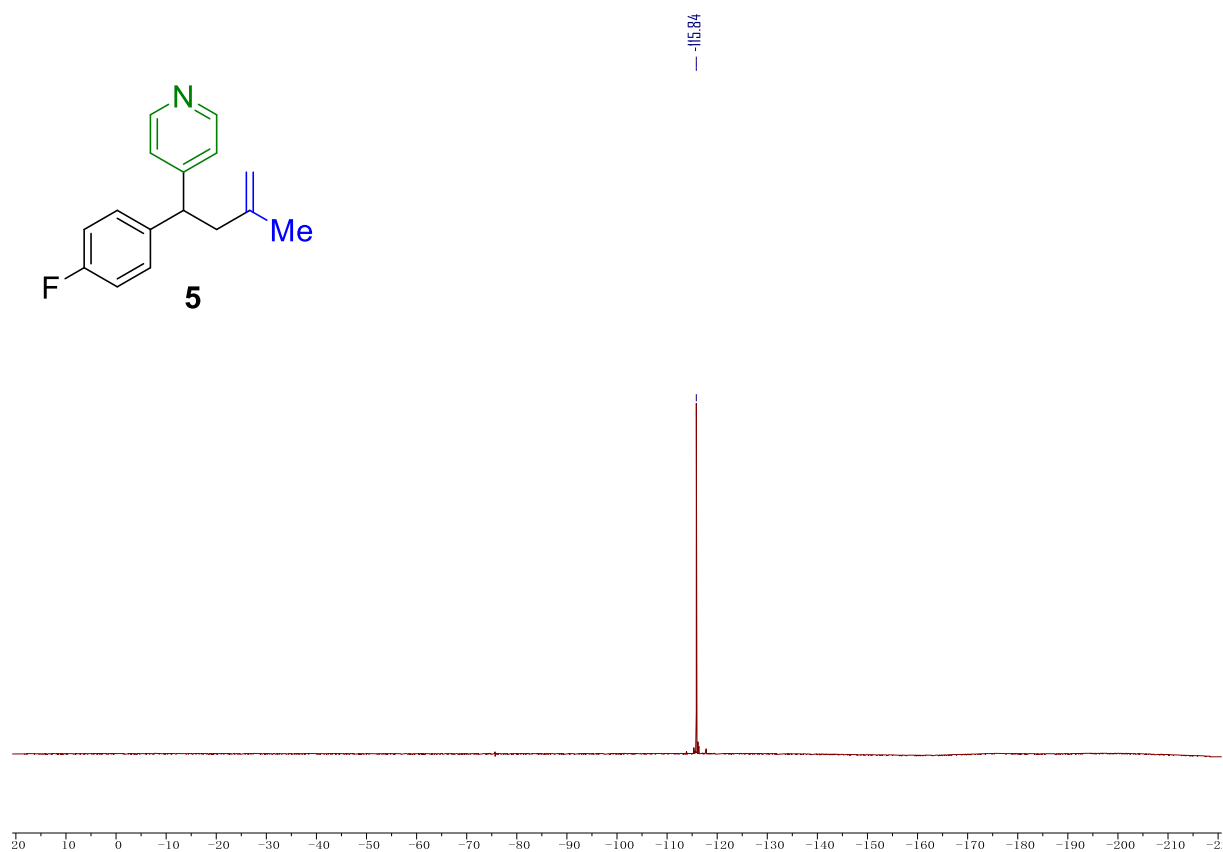

**$^1\text{H}$  NMR spectra of compound **6** (400 MHz, Chloroform-*d*)**

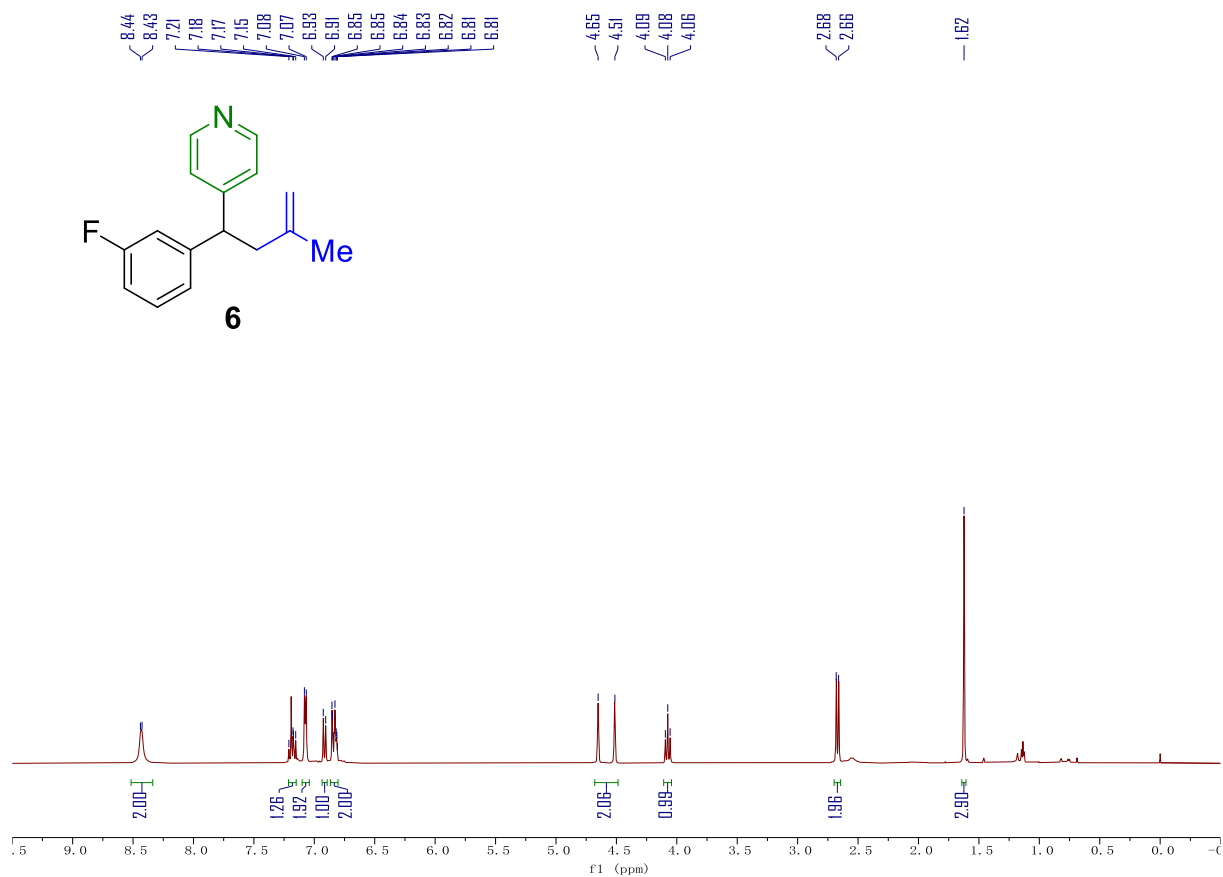

**$^{13}\text{C}$  NMR spectra of compound **6** (101 MHz, Chloroform-*d*)**

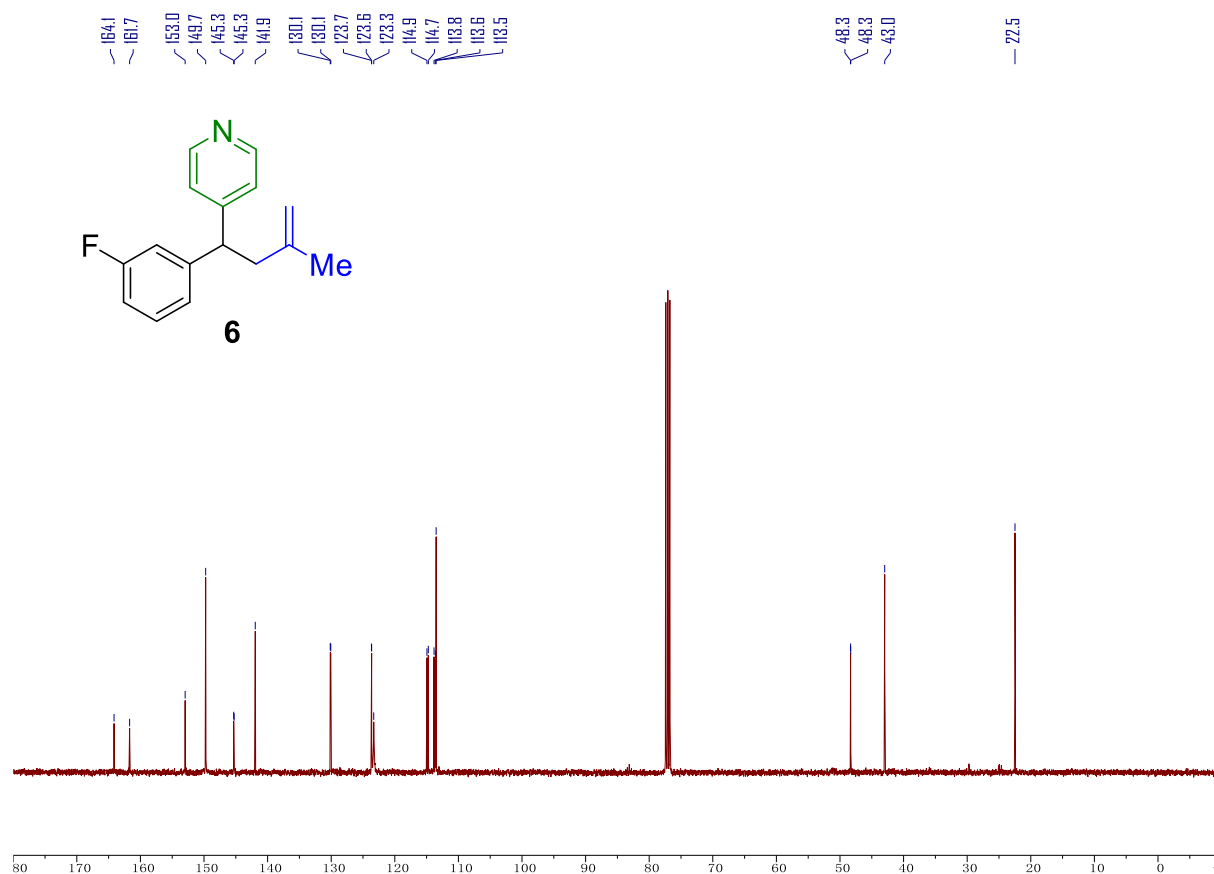

**$^{19}\text{F}$  NMR spectra of compound **6** (376 MHz, Chloroform-*d*)**

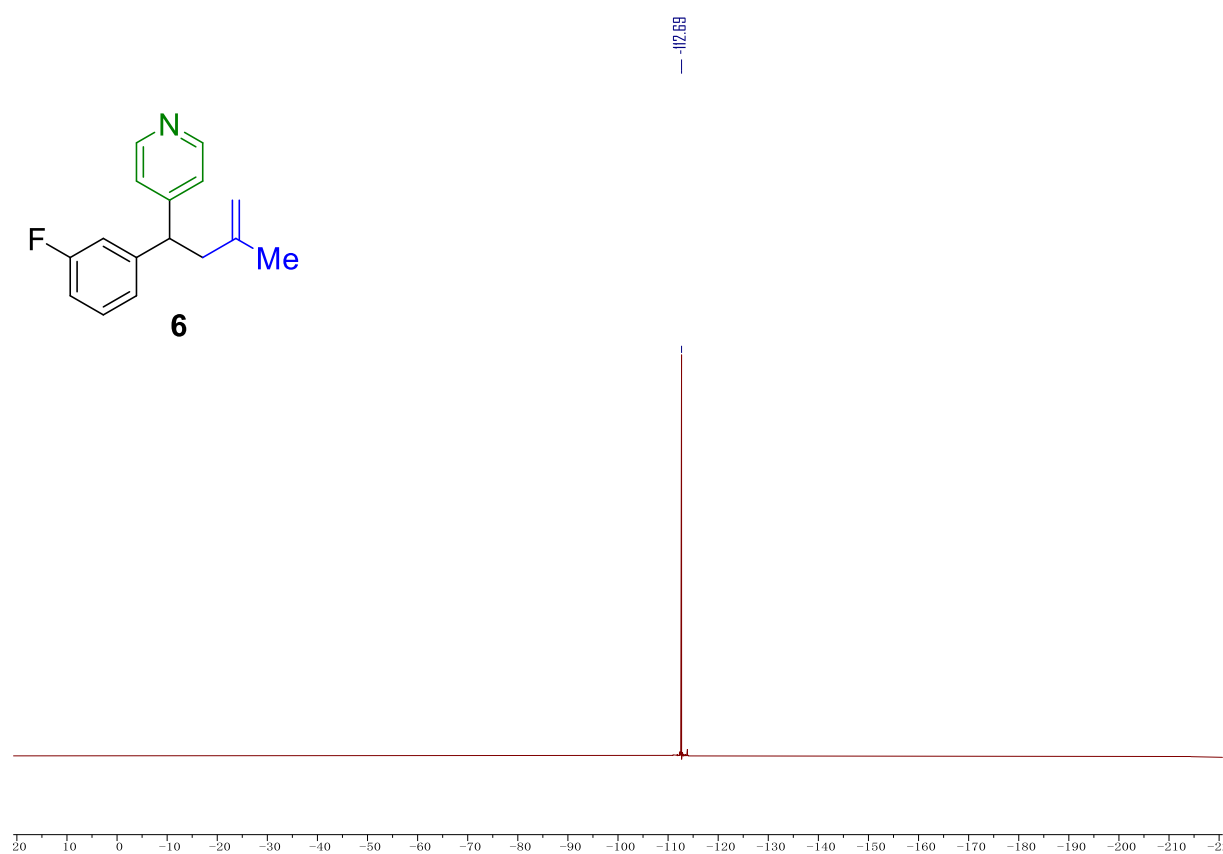

**<sup>1</sup>H NMR spectra of compound 7 (400 MHz, Chloroform-*d*)**

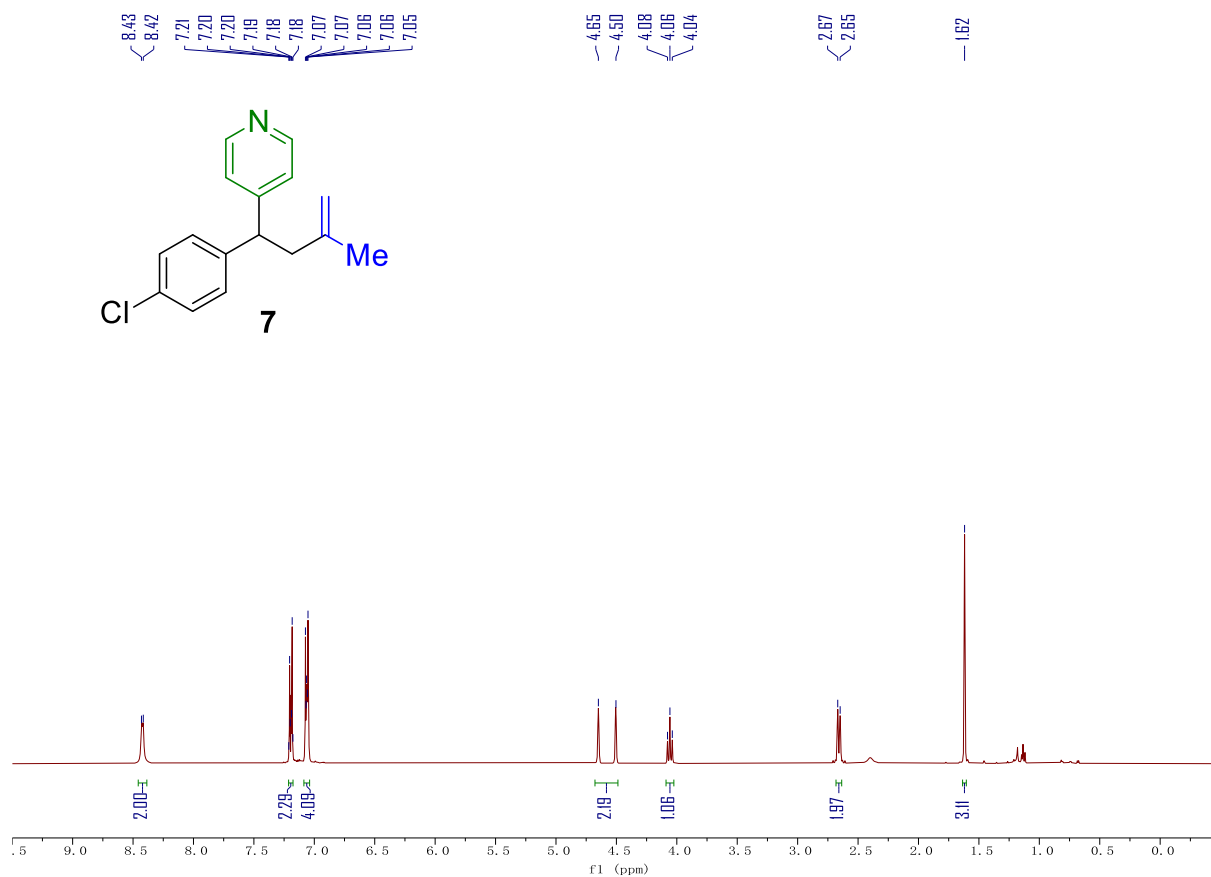

**<sup>13</sup>C NMR spectra of compound 7 (101 MHz, Chloroform-*d*)**

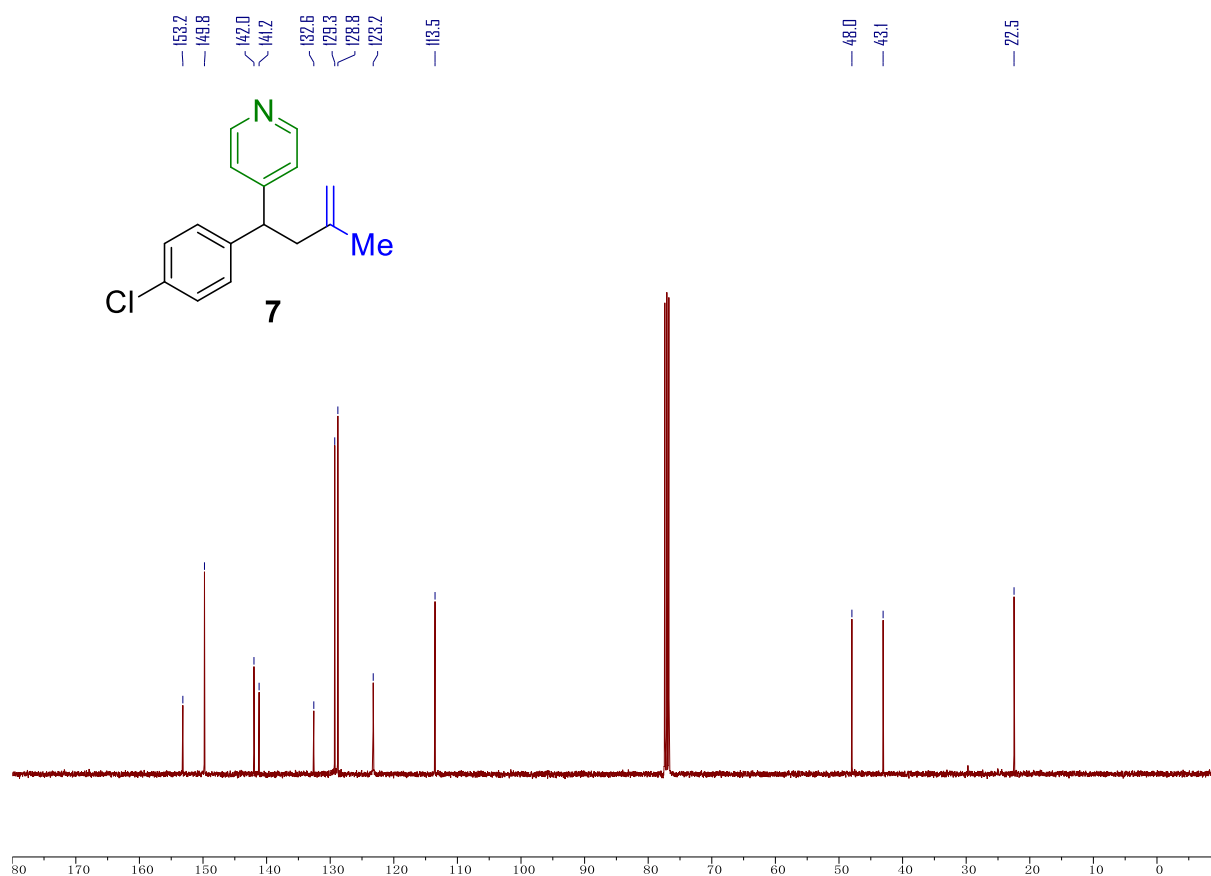



**<sup>1</sup>H NMR spectra of compound **8** (400 MHz, Chloroform-*d*)**

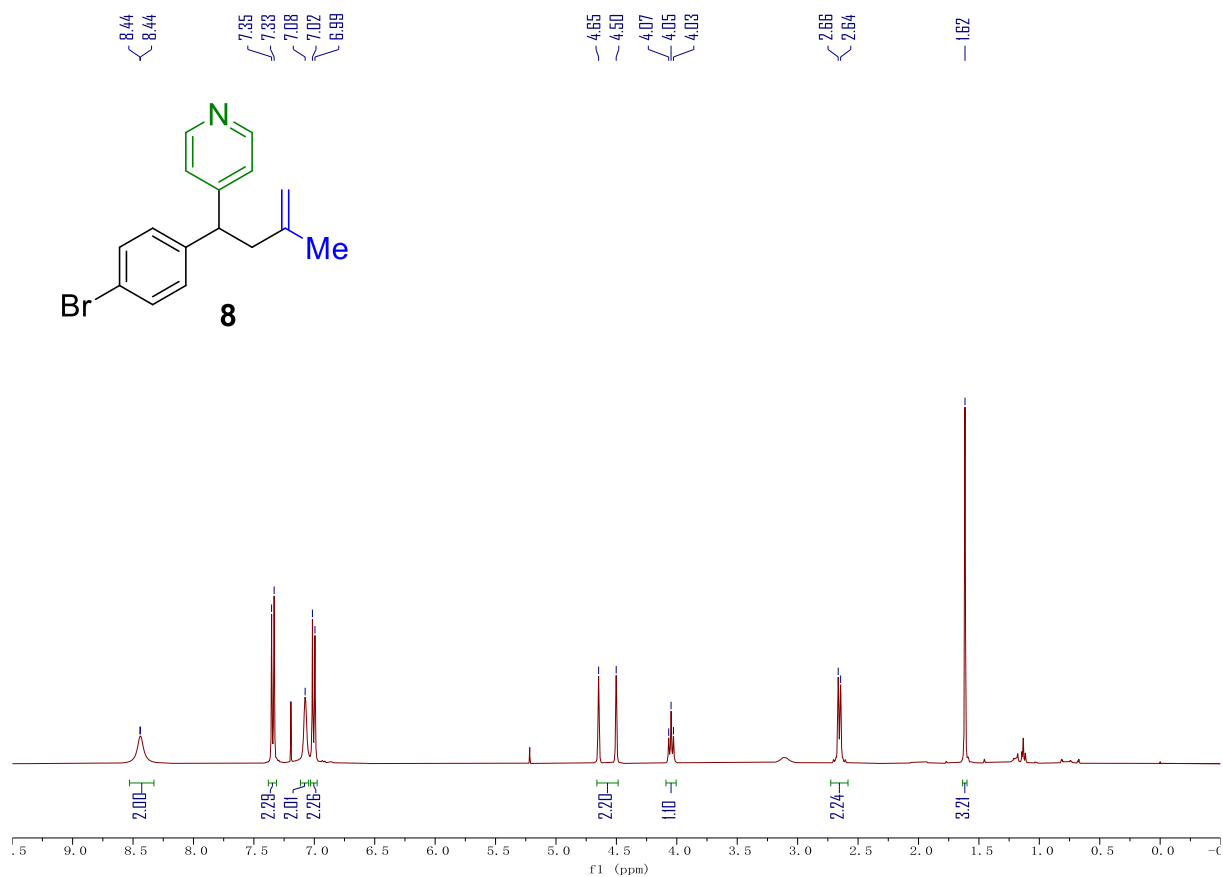

**<sup>13</sup>C NMR spectra of compound **8** (101 MHz, Chloroform-*d*)**

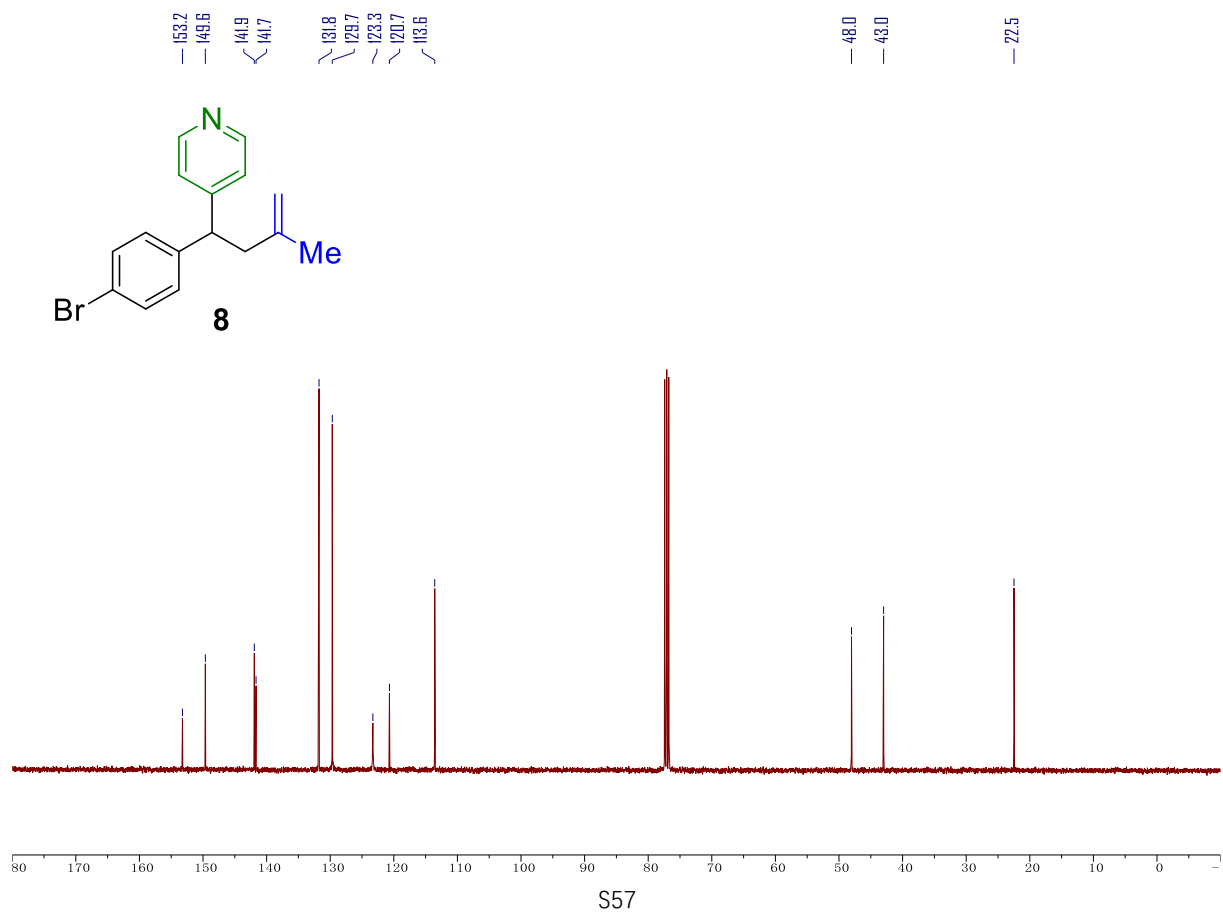

**<sup>1</sup>H NMR spectra of compound 9 (400 MHz, Chloroform-*d*)**

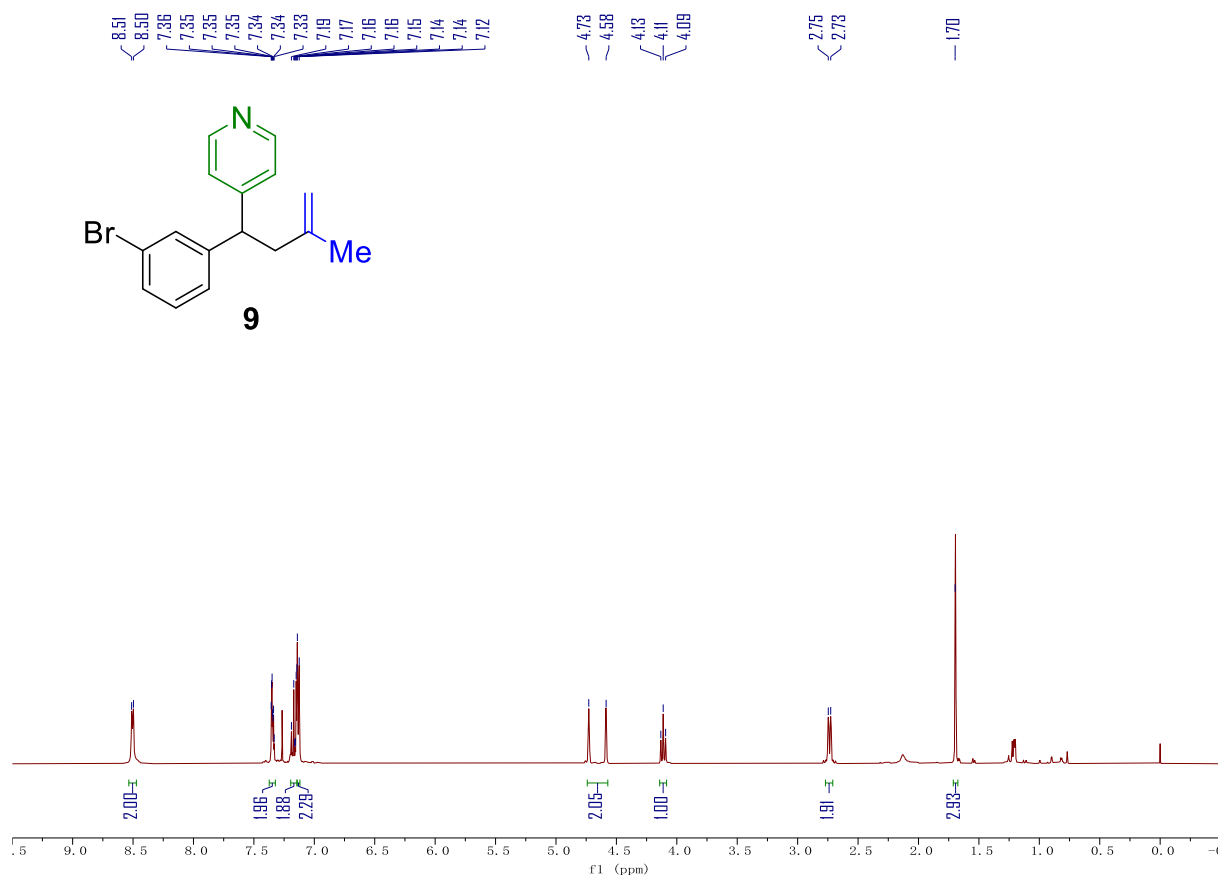

**<sup>13</sup>C NMR spectra of compound 9 (101 MHz, Chloroform-*d*)**

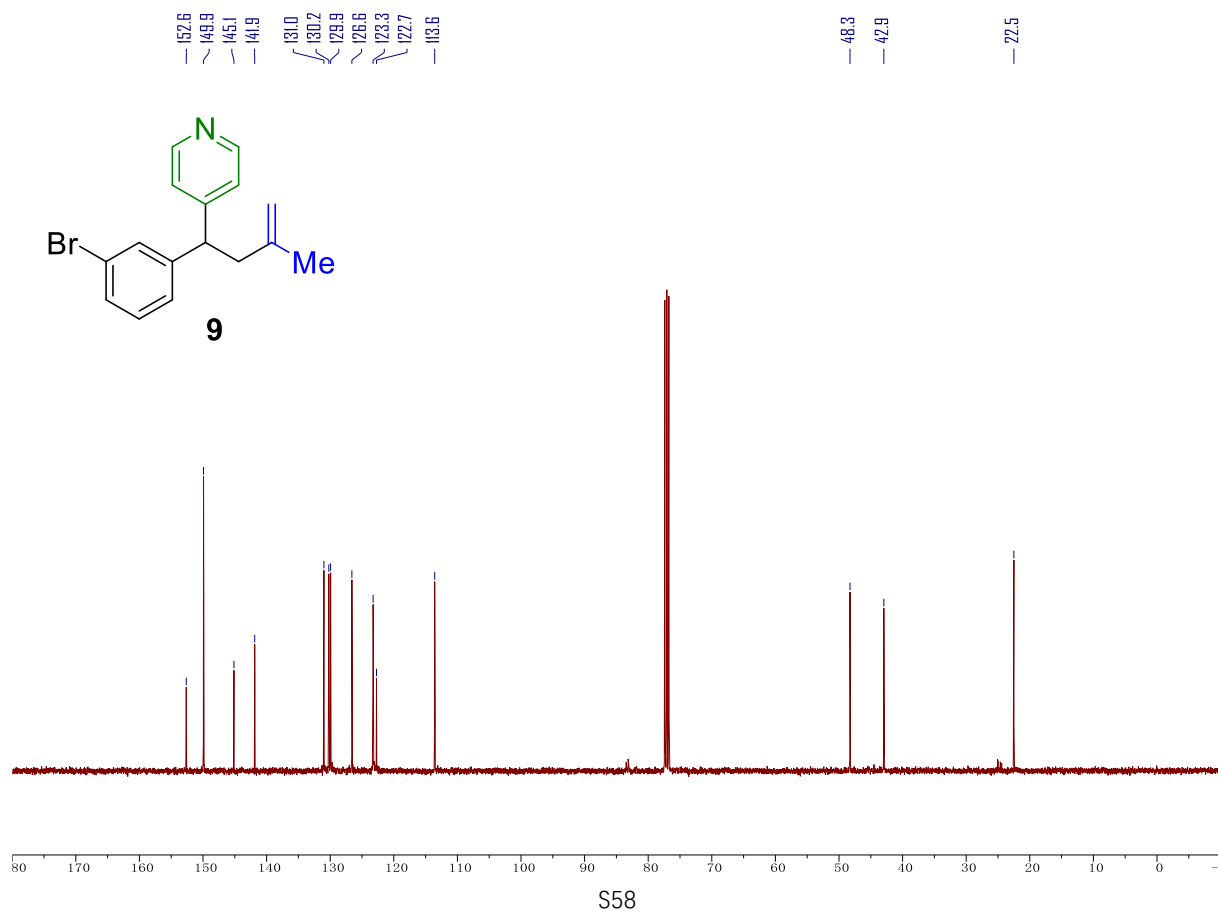

**<sup>1</sup>H NMR spectra of compound **10** (400 MHz, Chloroform-*d*)**

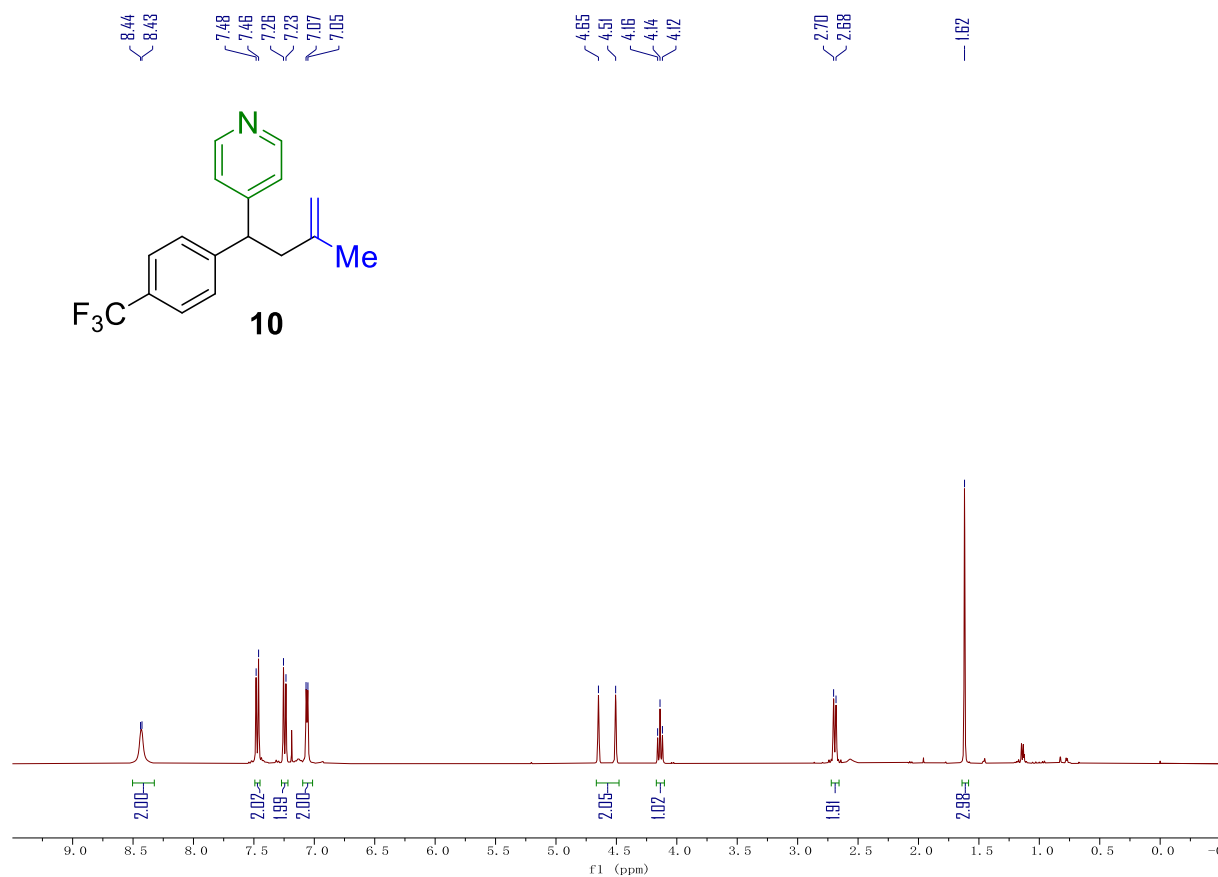

**<sup>13</sup>C NMR spectra of compound **10** (101 MHz, Chloroform-*d*)**

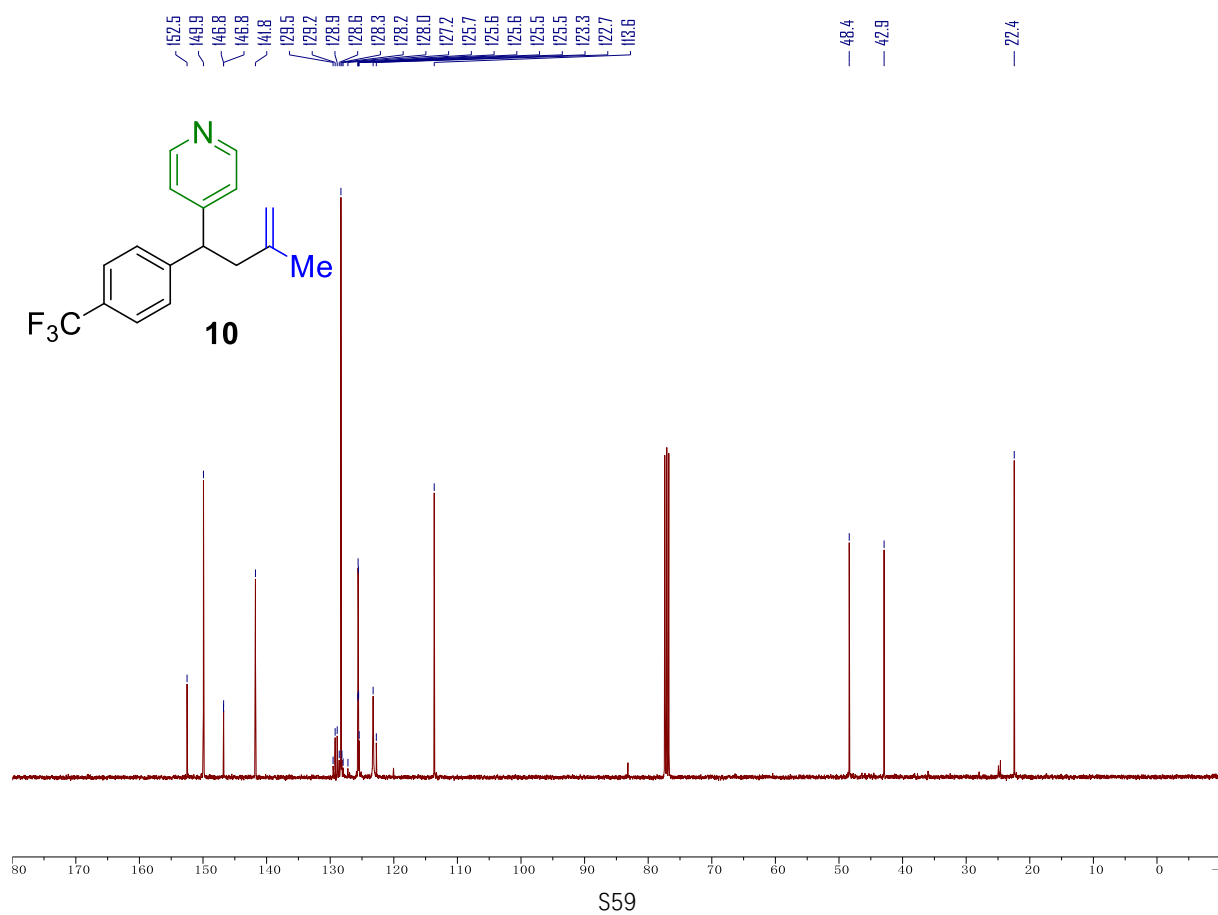

**$^{19}\text{F}$  NMR spectra of compound **10** (376 MHz, Chloroform-*d*)**

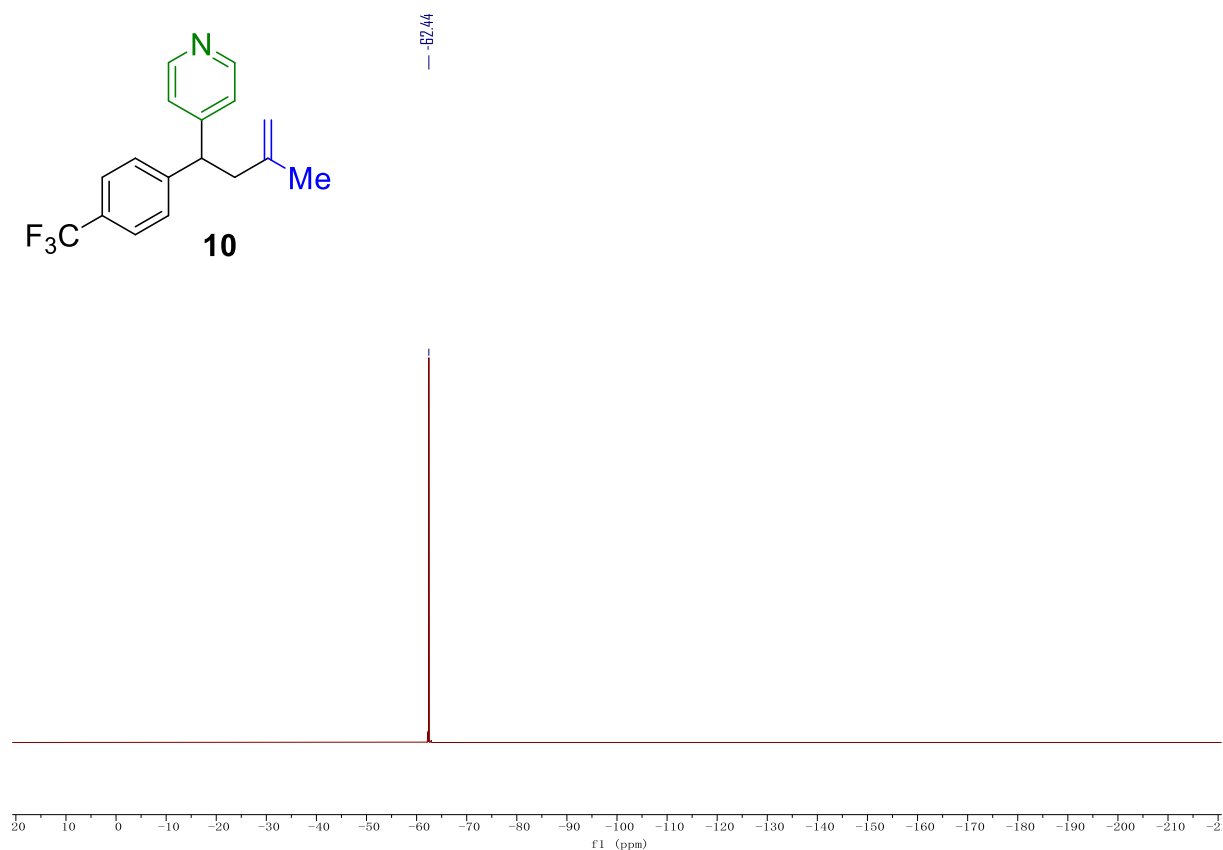

**$^1\text{H}$  NMR spectra of compound **11** (400 MHz, Chloroform-*d*)**

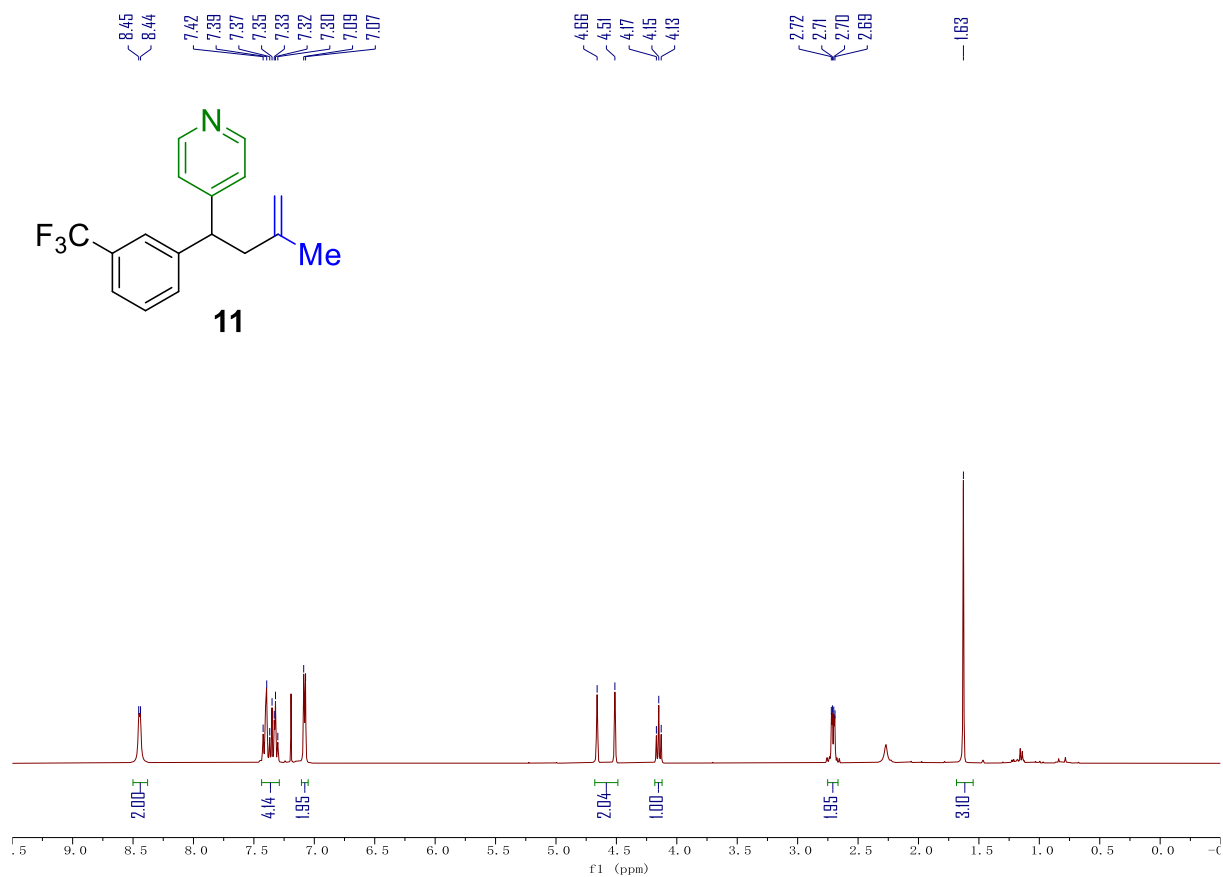

**$^{13}\text{C}$  NMR spectra of compound **11** (101 MHz, Chloroform-*d*)**

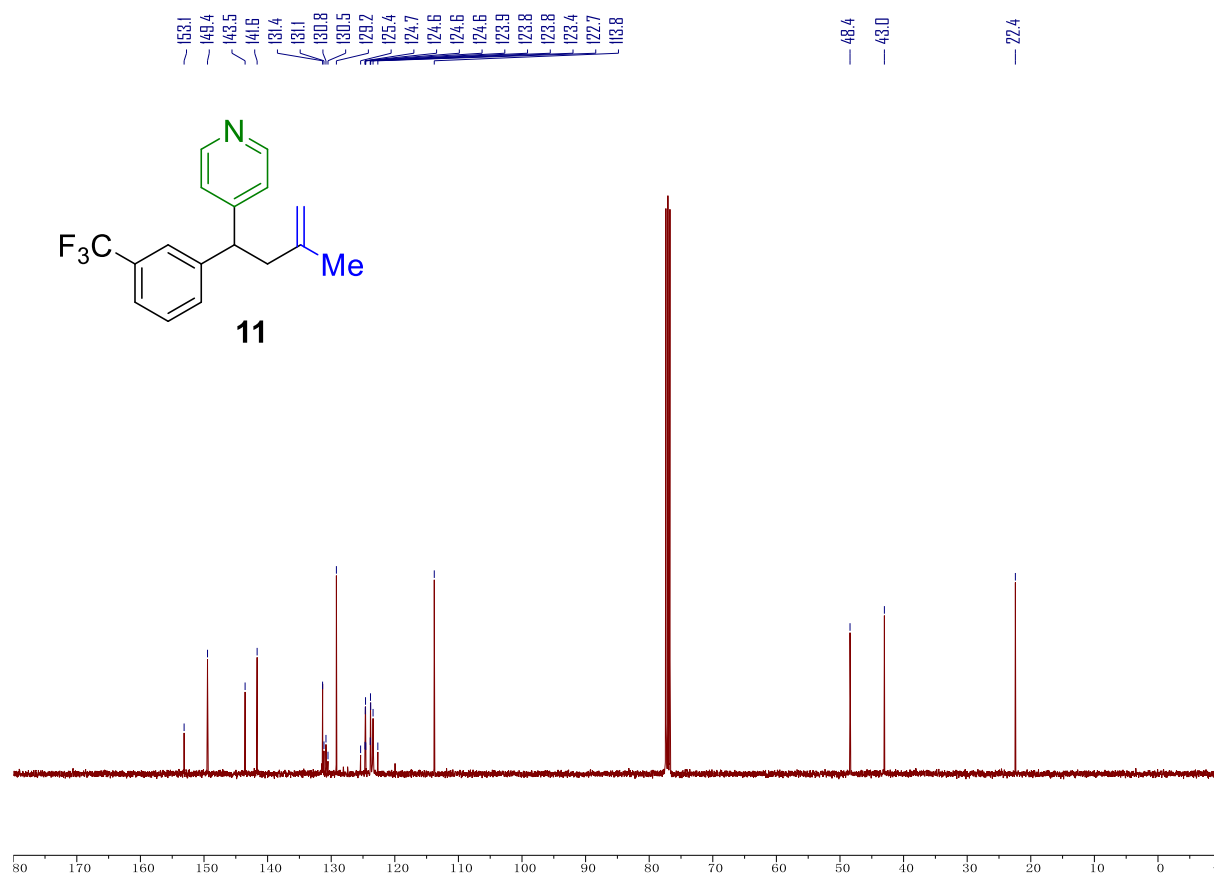

**$^{19}\text{F}$  NMR spectra of compound **11** (376 MHz, Chloroform-*d*)**

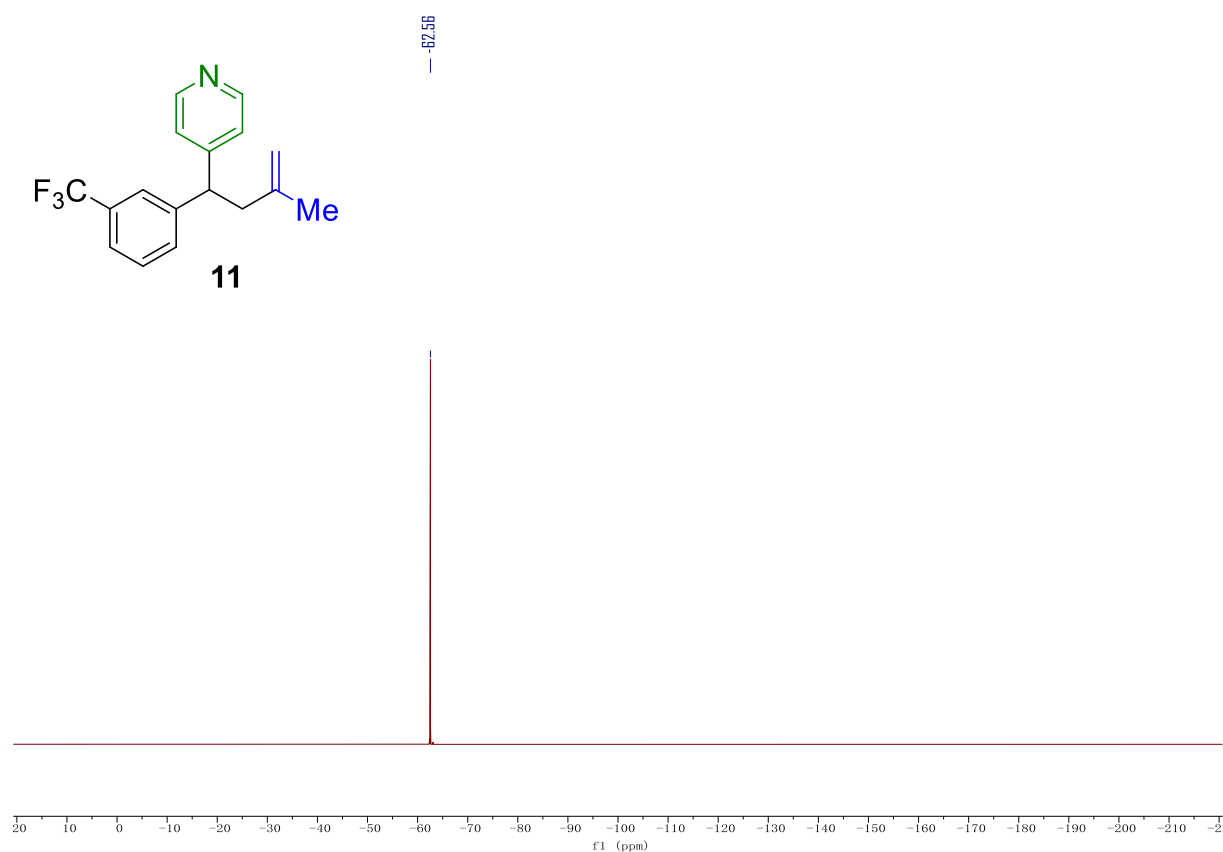

**<sup>1</sup>H NMR spectra of compound 12 (400 MHz, Chloroform-*d*)**

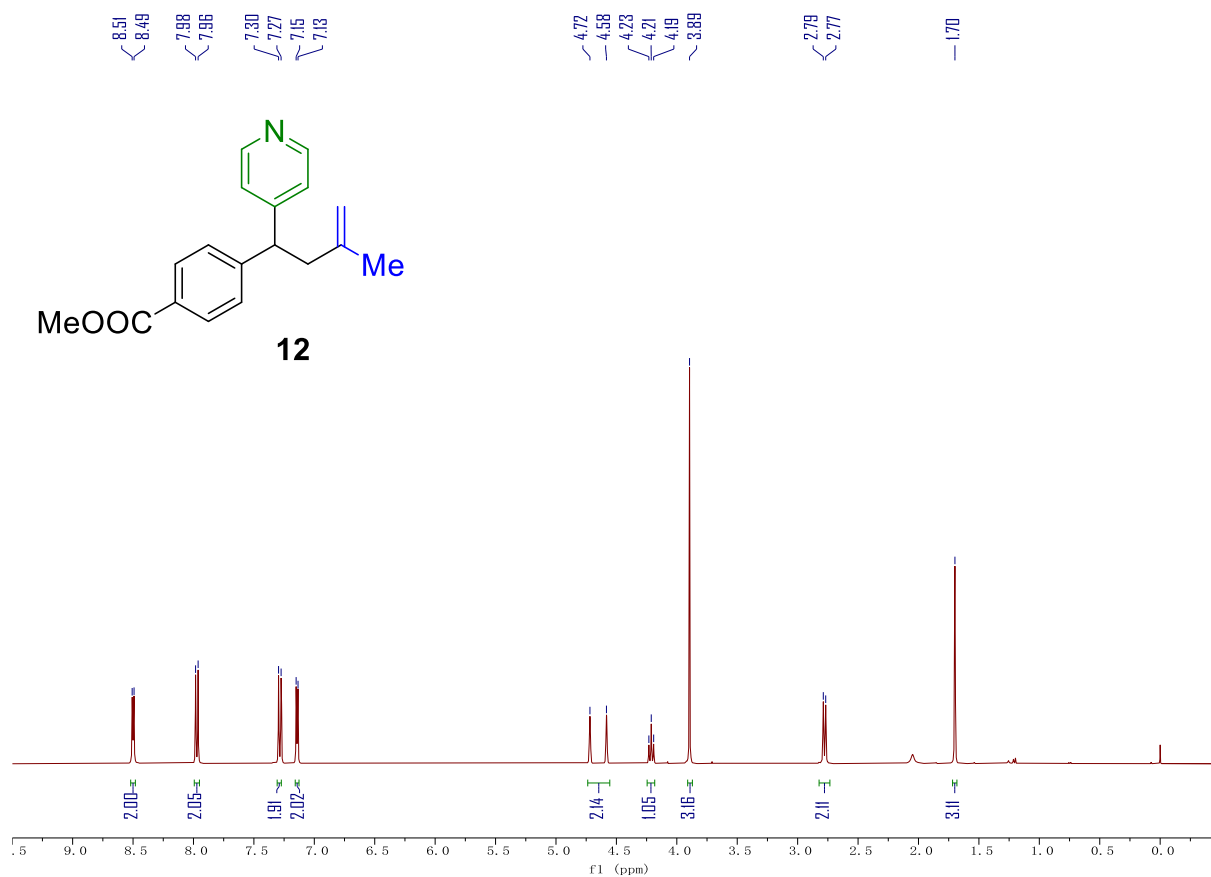

**<sup>13</sup>C NMR spectra of compound 12 (101 MHz, Chloroform-*d*)**

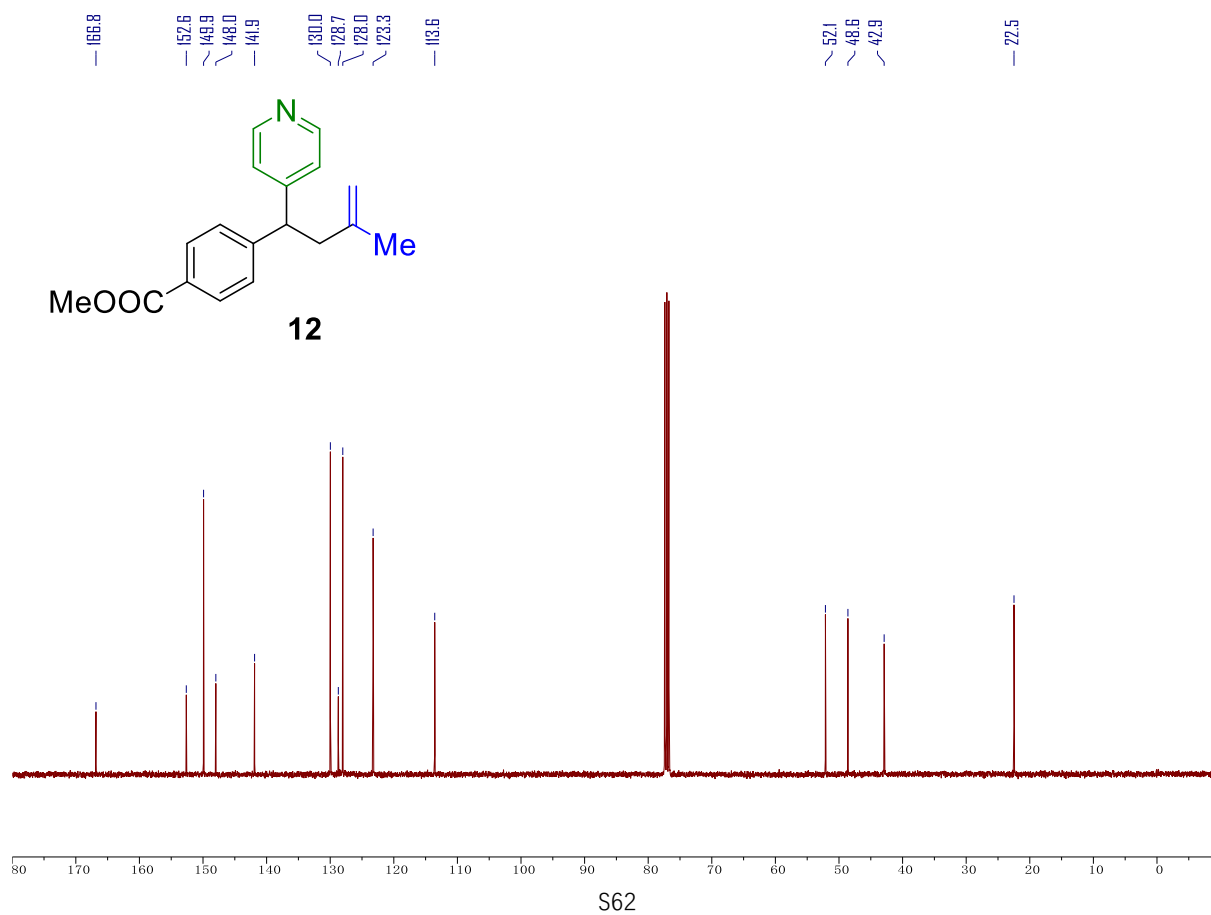

**<sup>1</sup>H NMR spectra of compound **13** (400 MHz, Chloroform-*d*)**

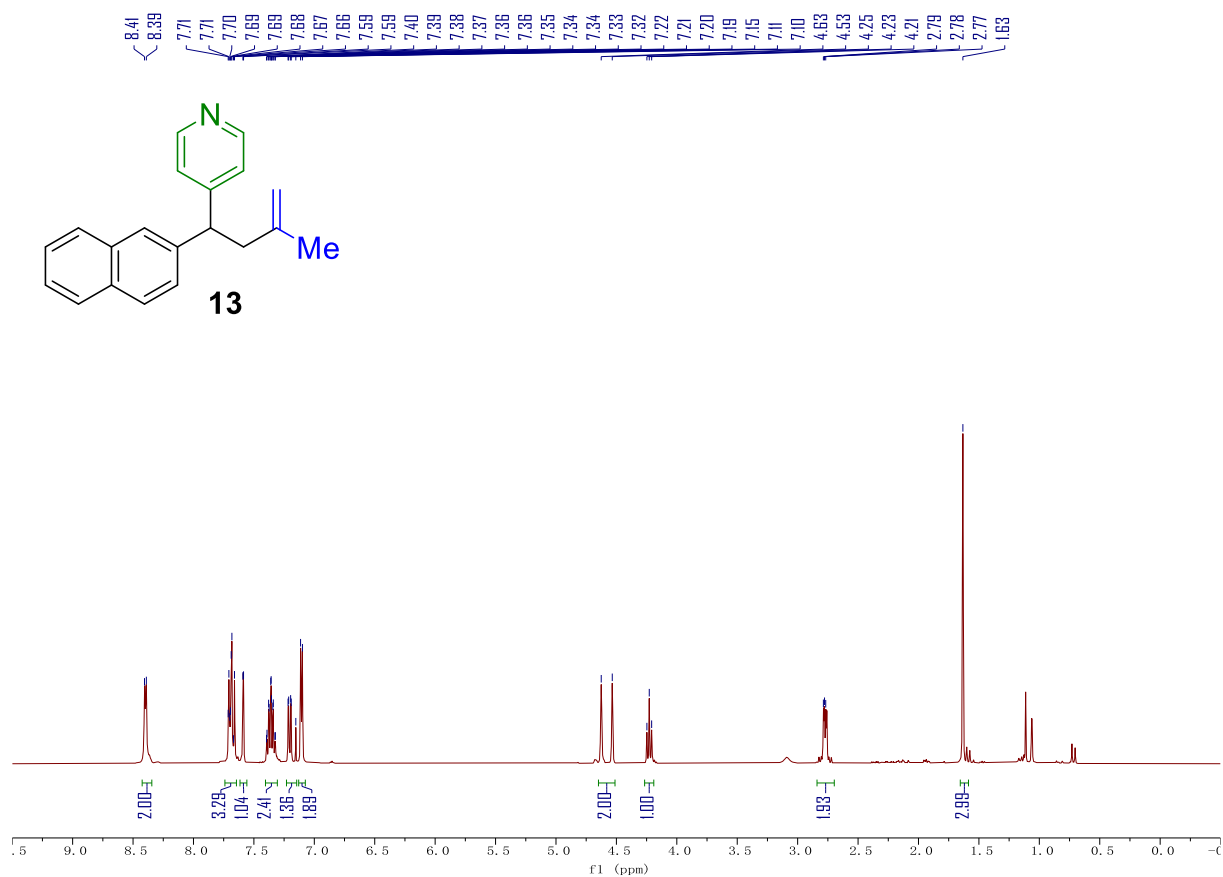

**<sup>13</sup>C NMR spectra of compound **13** (101 MHz, Chloroform-*d*)**

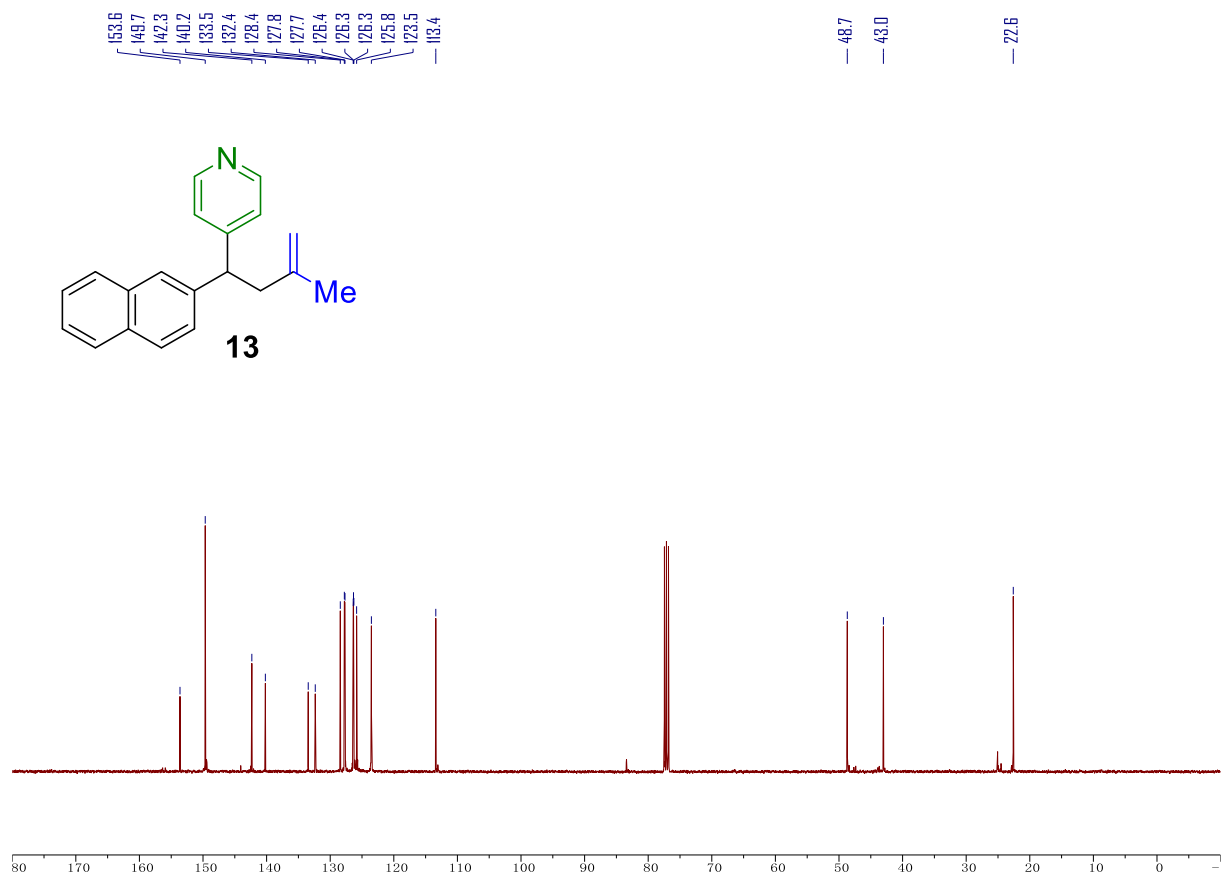

**<sup>1</sup>H NMR spectra of compound 14 (400 MHz, Chloroform-*d*)**

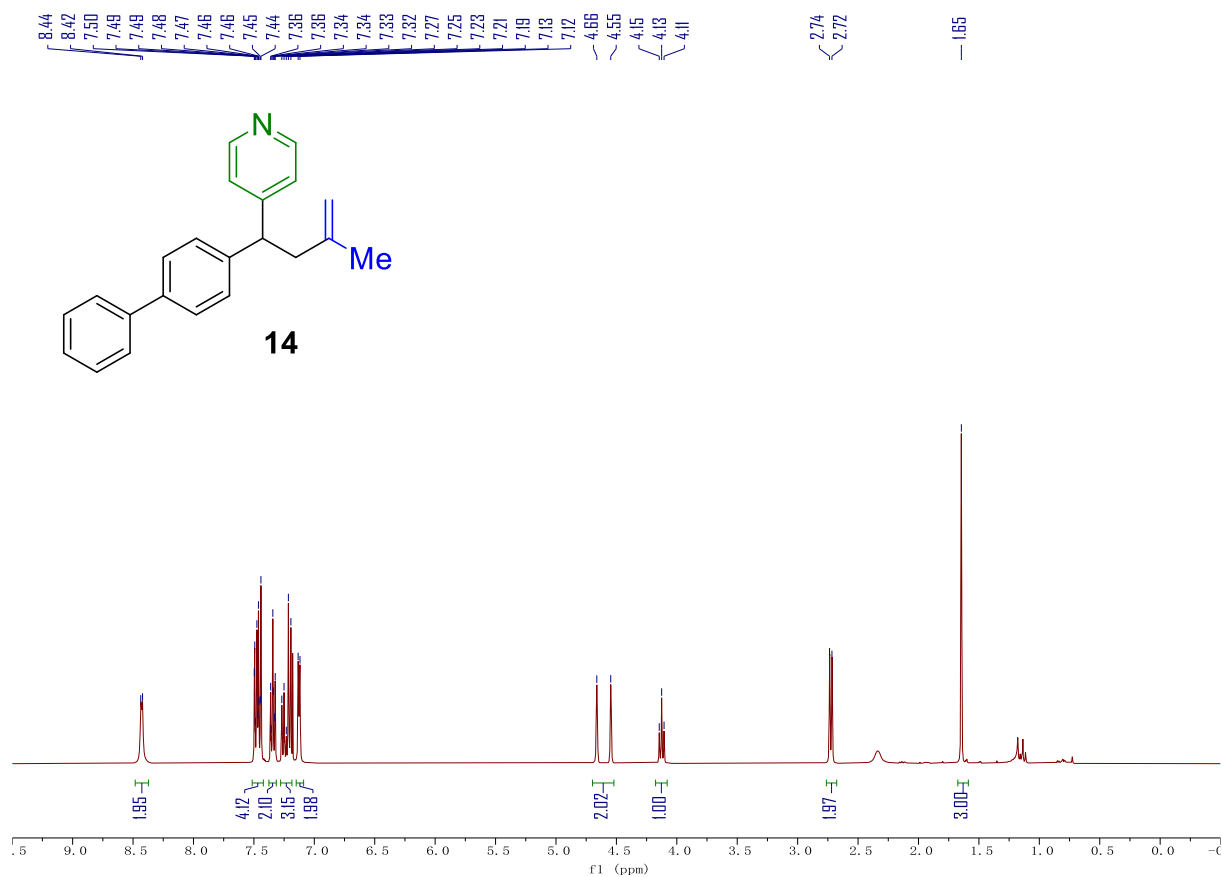

**<sup>13</sup>C NMR spectra of compound 14 (101 MHz, Chloroform-*d*)**

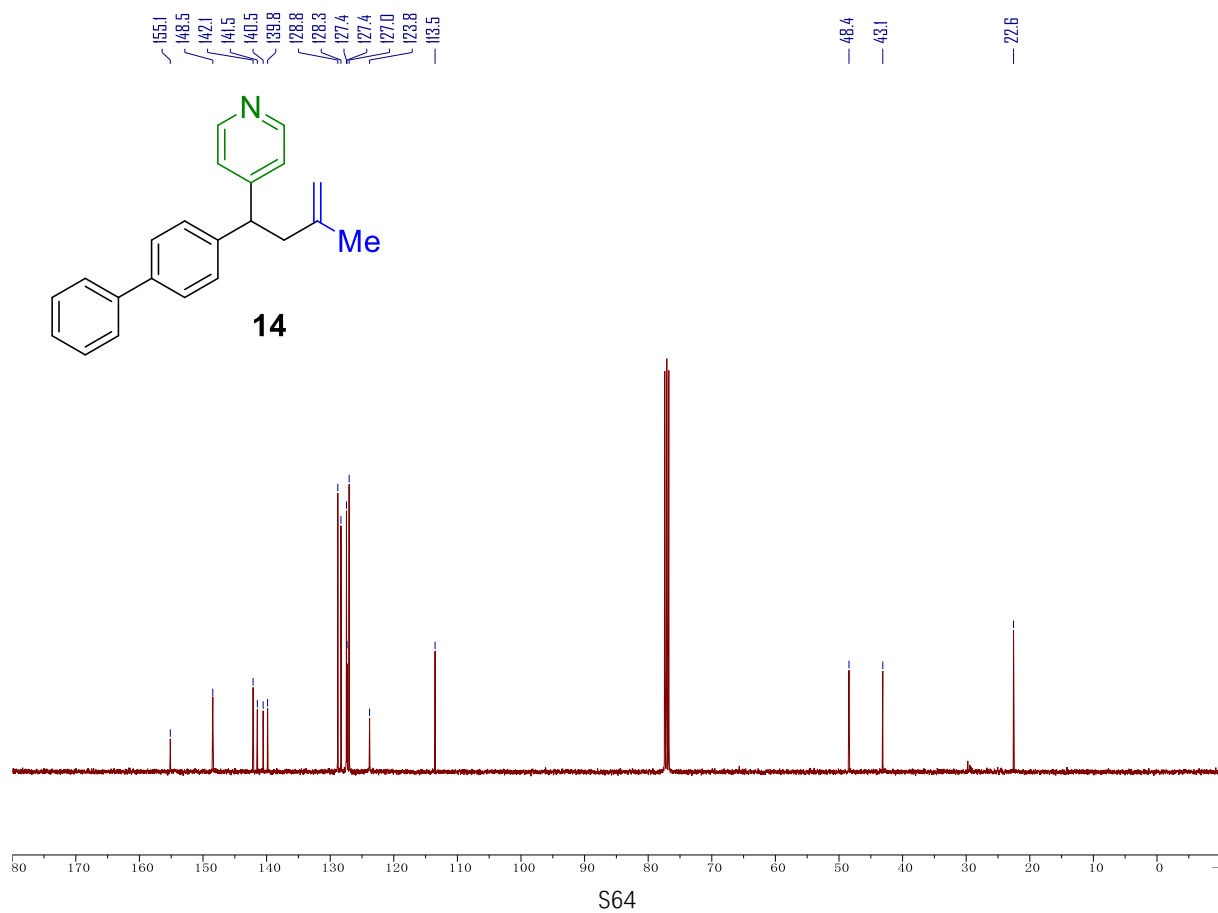



**<sup>1</sup>H NMR spectra of compound **15** (400 MHz, Chloroform-*d*)**

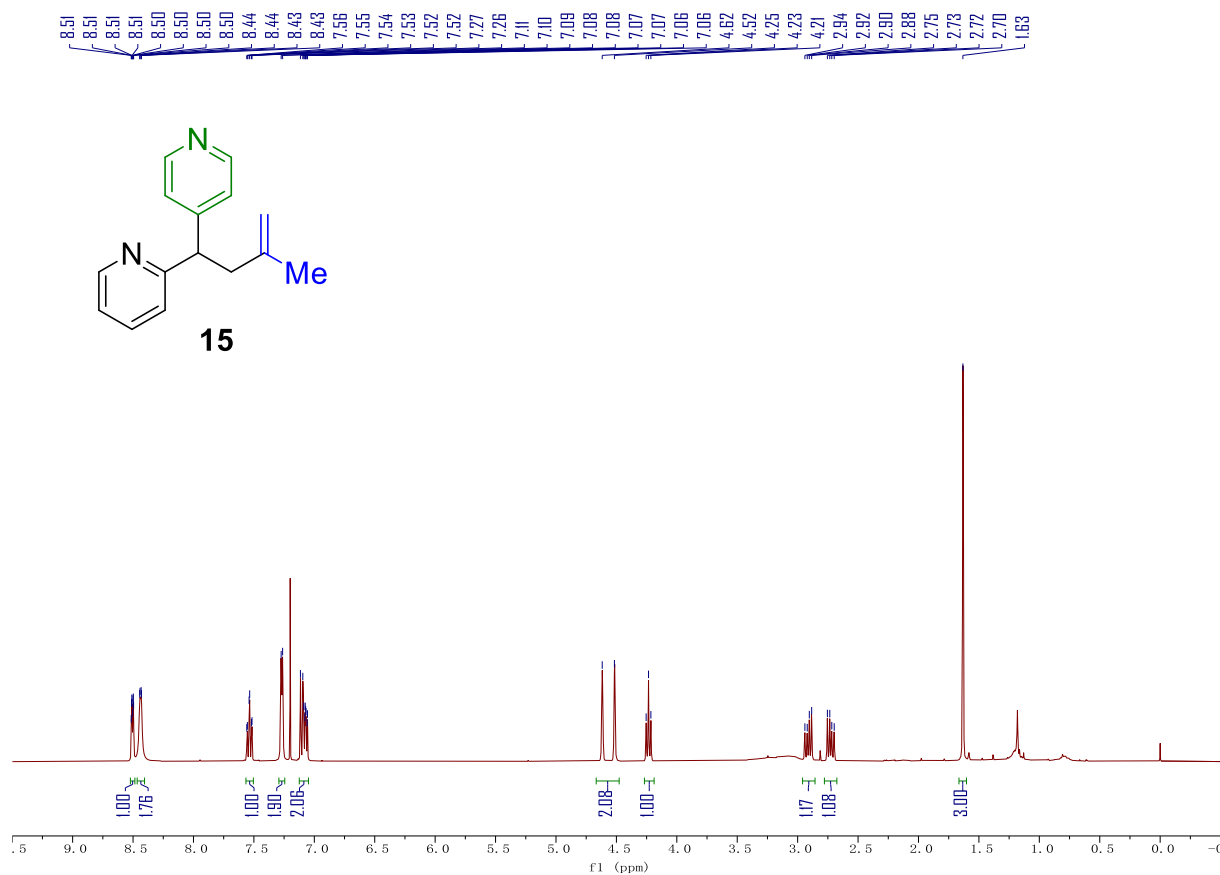

**<sup>13</sup>C NMR spectra of compound **15** (101 MHz, Chloroform-*d*)**

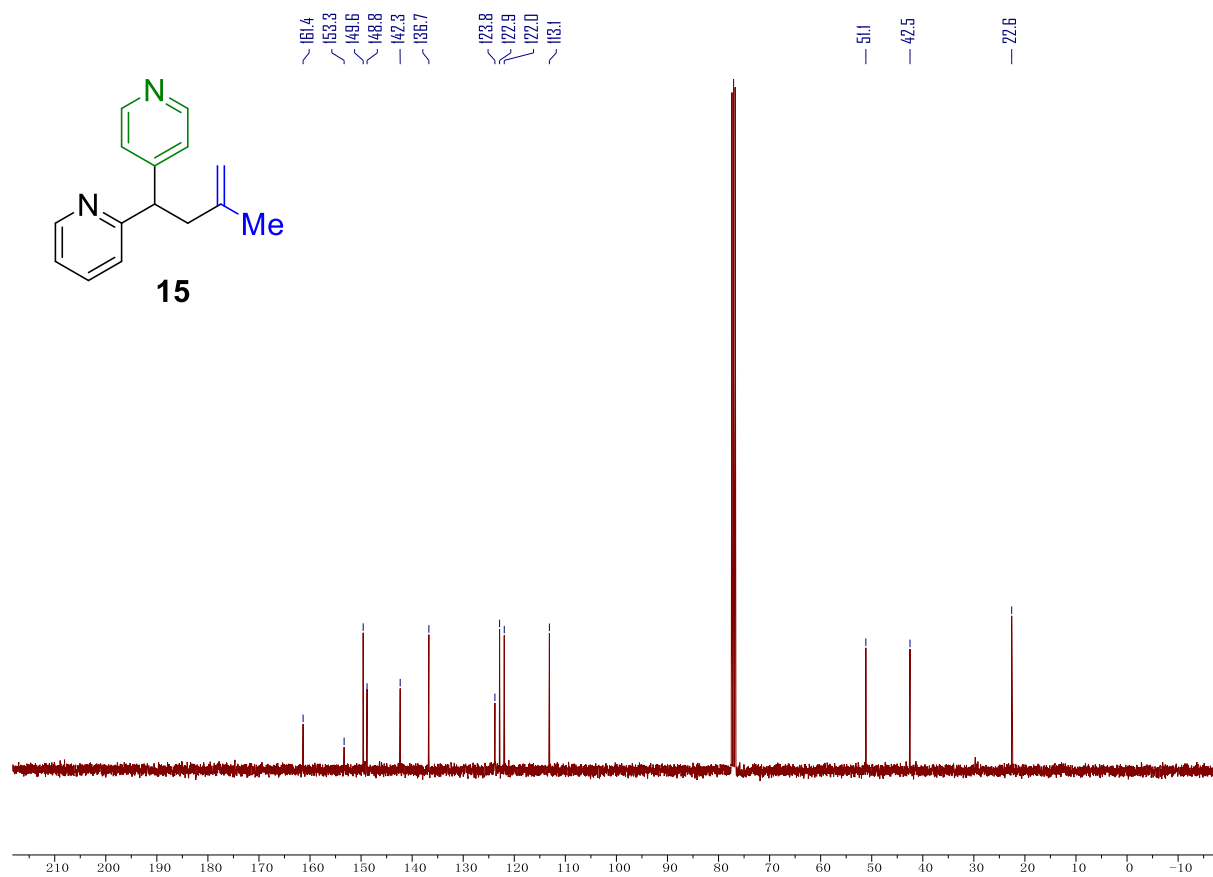

**$^1\text{H}$  NMR spectra of compound **16** (400 MHz, Chloroform-*d*)**

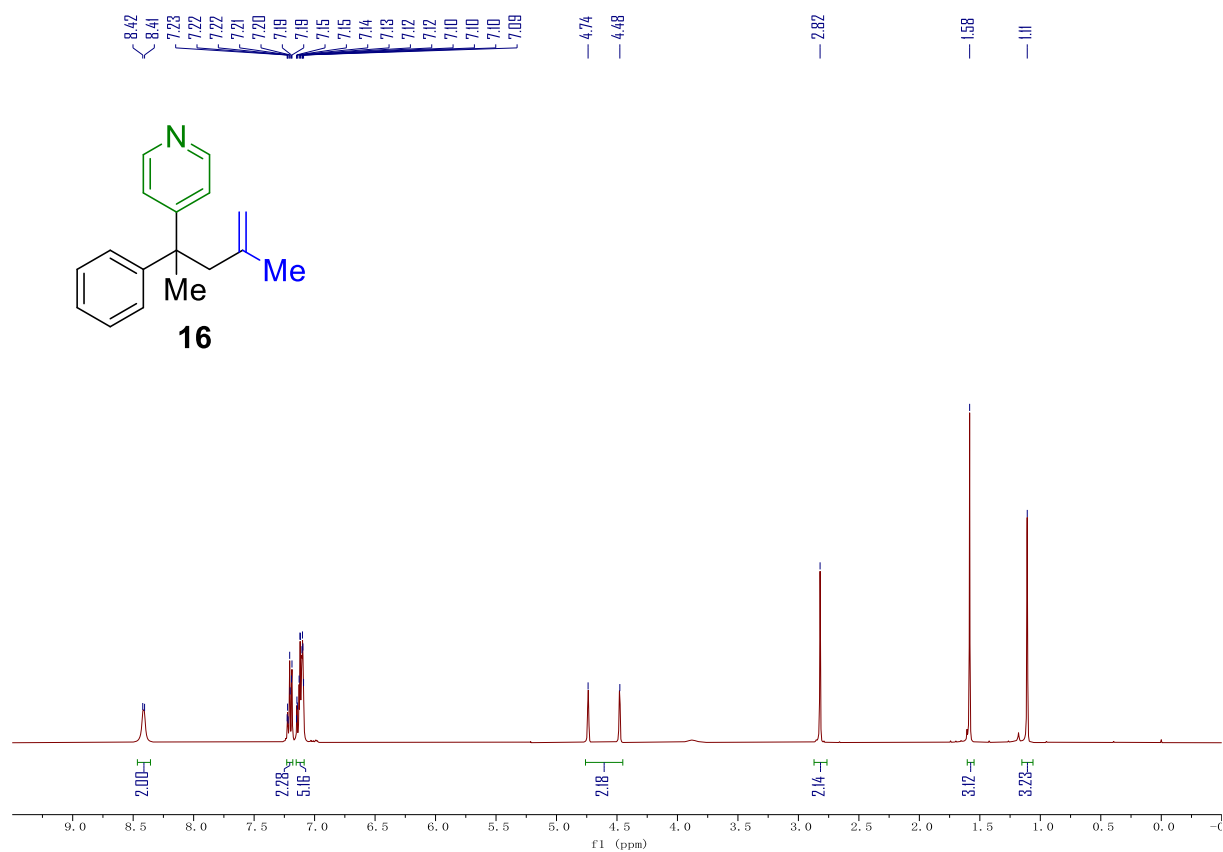

**$^{13}\text{C}$  NMR spectra of compound **16** (101 MHz, Chloroform-*d*)**

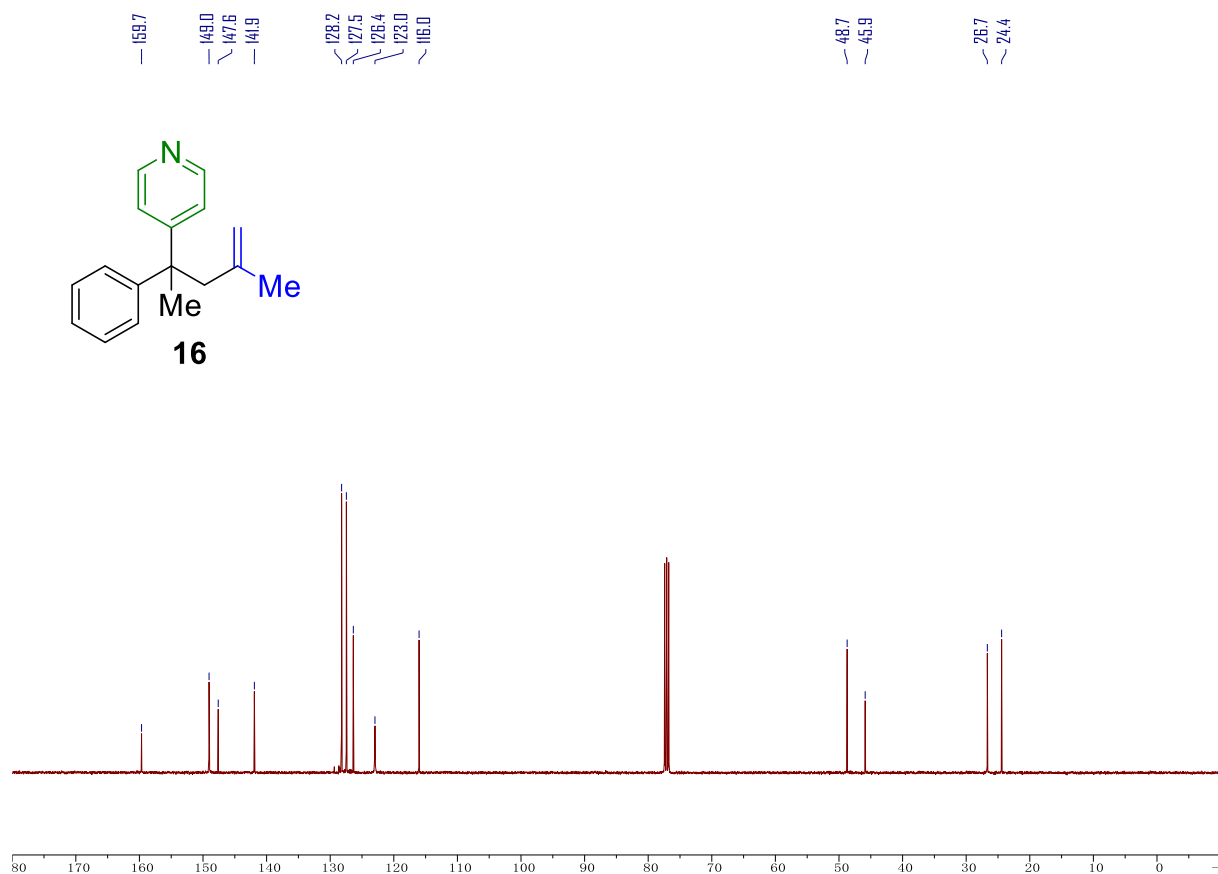

**<sup>1</sup>H NMR spectra of compound 17 (400 MHz, Chloroform-*d*)**

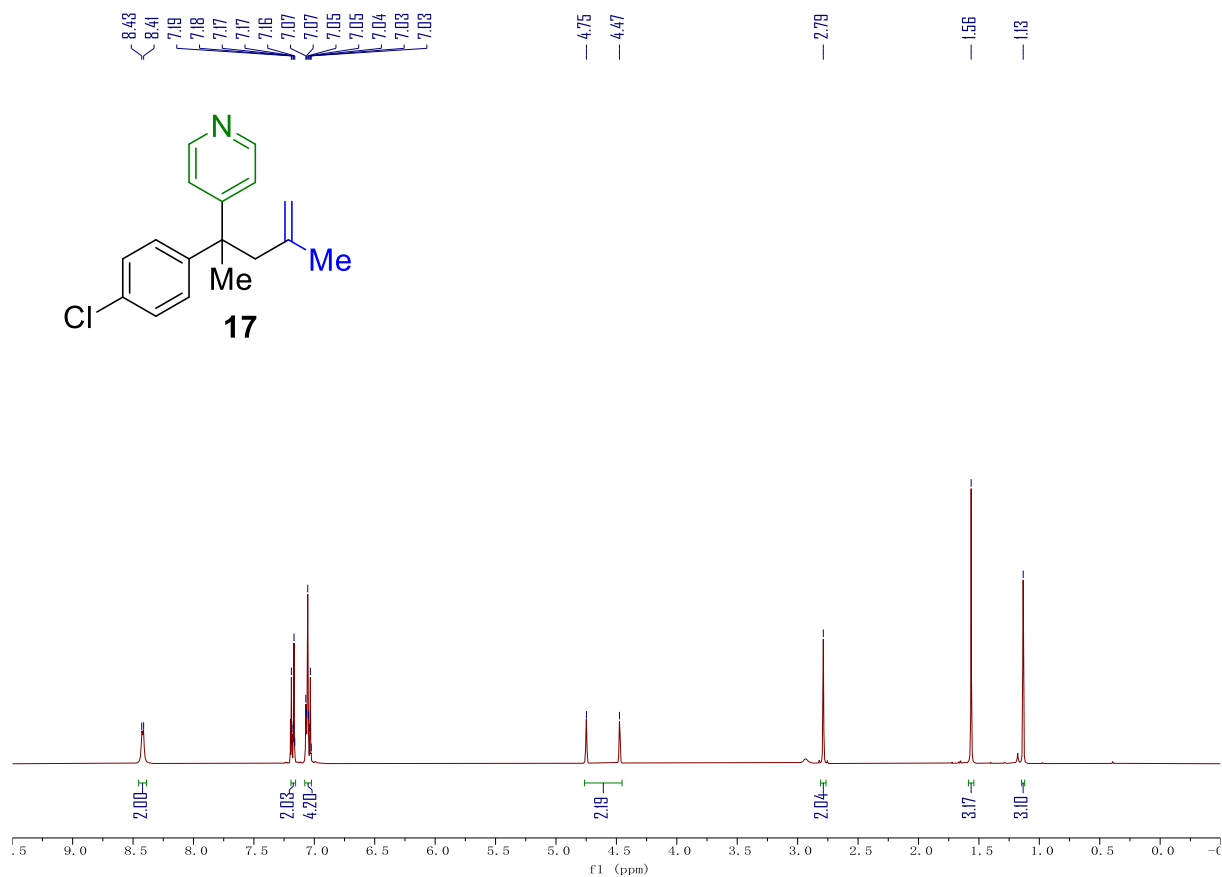

**<sup>13</sup>C NMR spectra of compound 17 (101 MHz, Chloroform-*d*)**

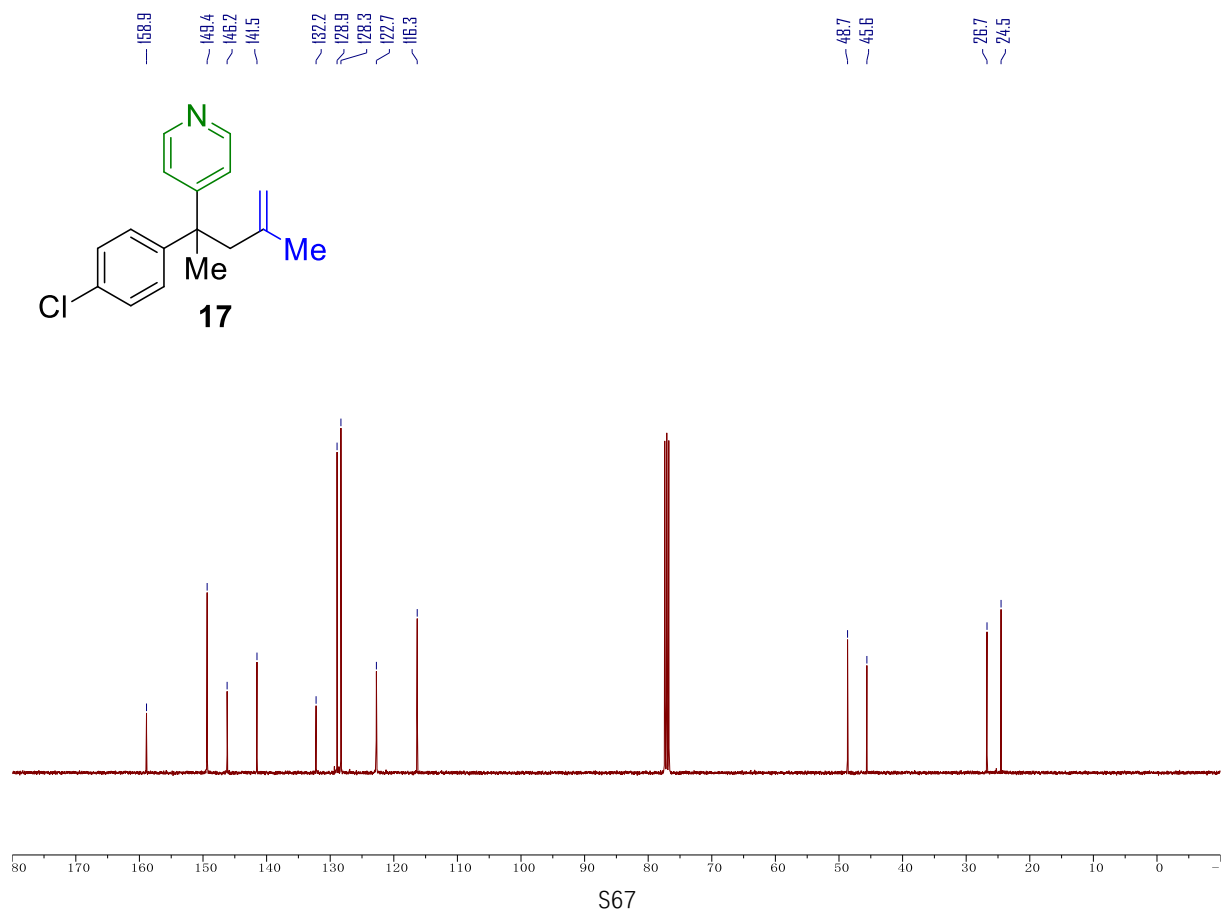

**<sup>1</sup>H NMR spectra of compound **18** (400 MHz, Chloroform-*d*)**

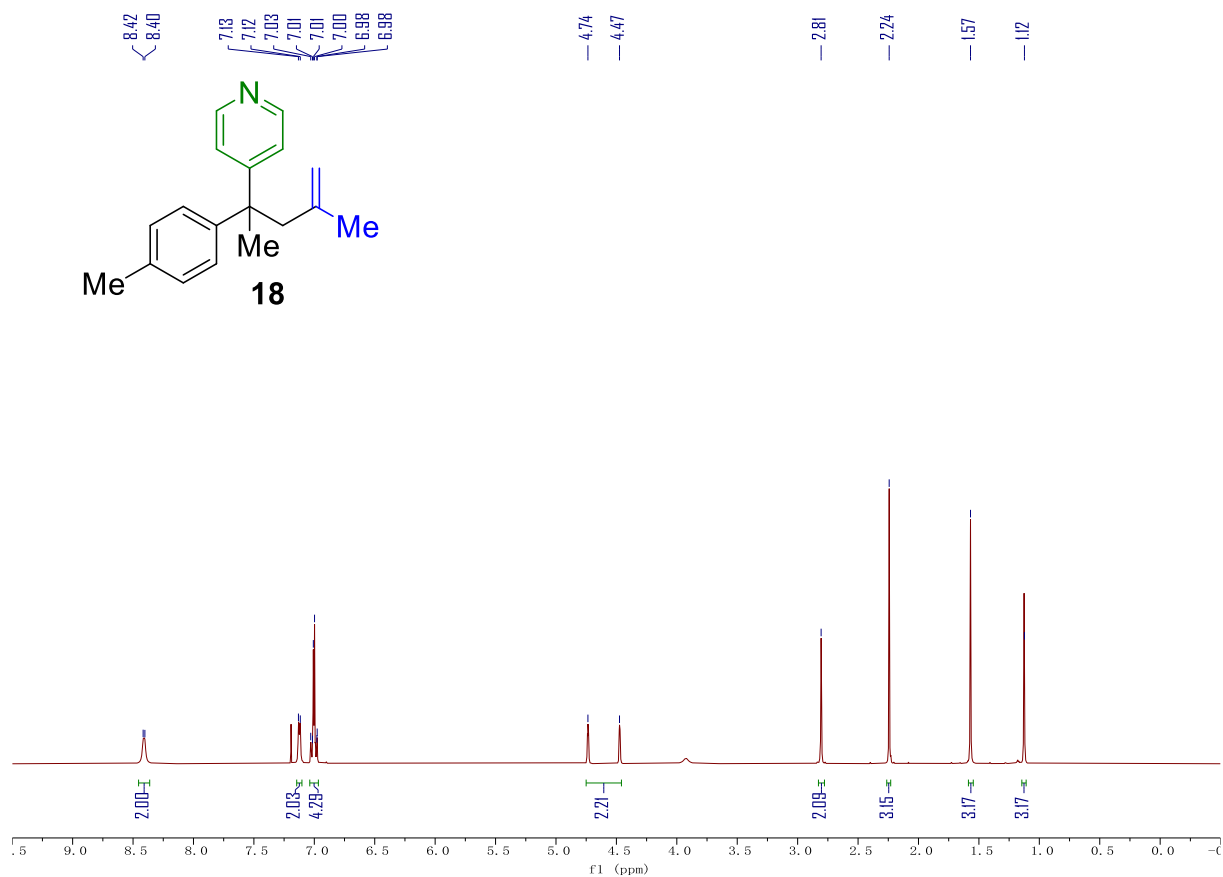

**<sup>13</sup>C NMR spectra of compound **18** (101 MHz, Chloroform-*d*)**

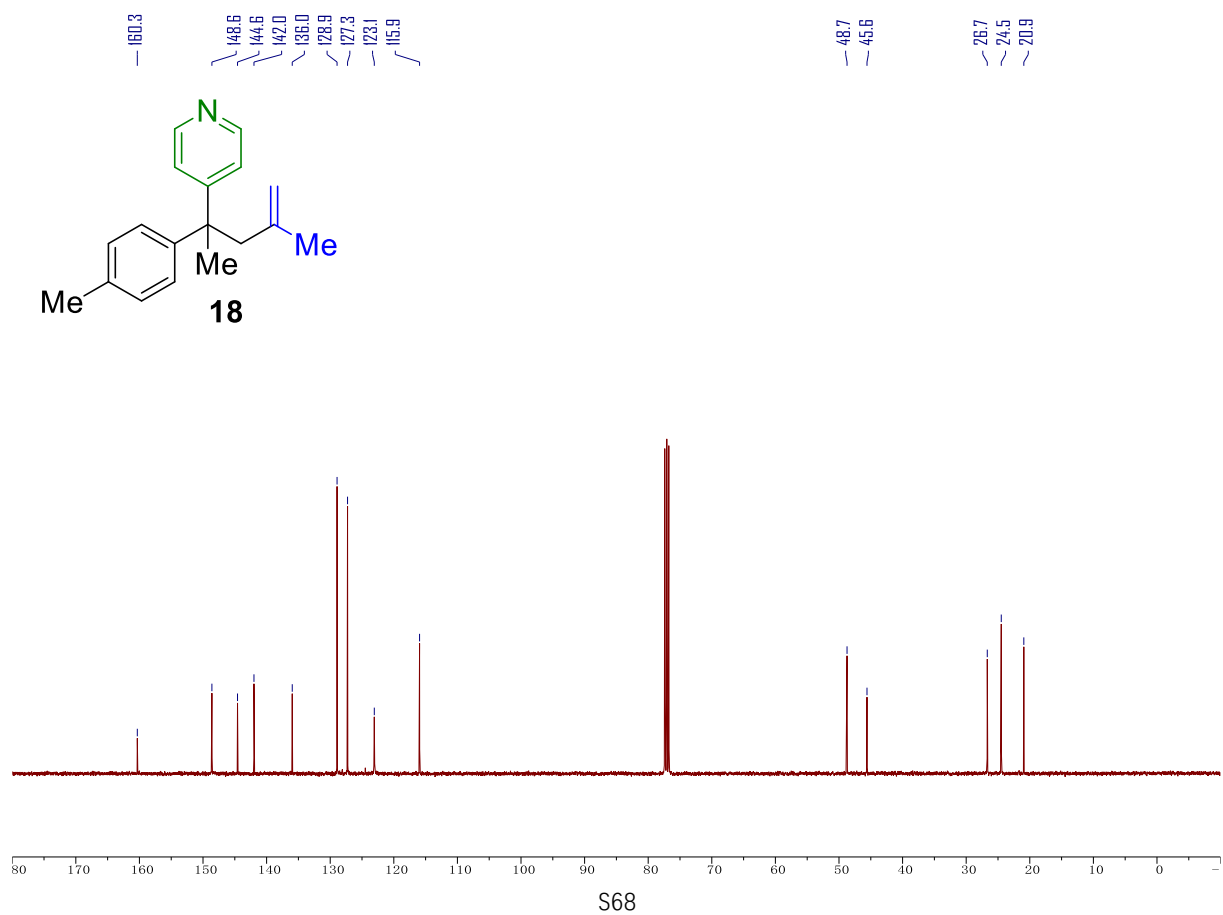

**<sup>1</sup>H NMR spectra of compound **19** (400 MHz, Chloroform-*d*)**

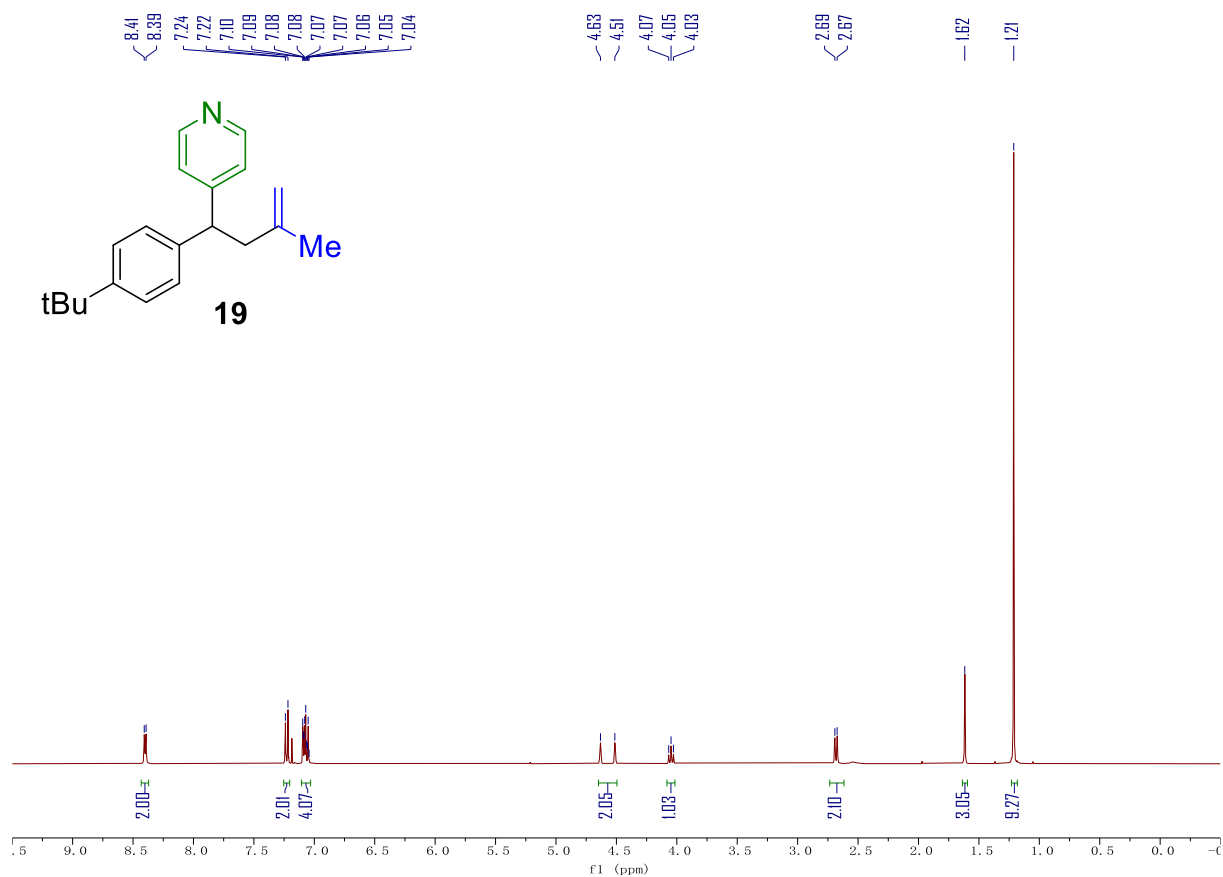

**<sup>13</sup>C NMR spectra of compound **19** (101 MHz, Chloroform-*d*)**

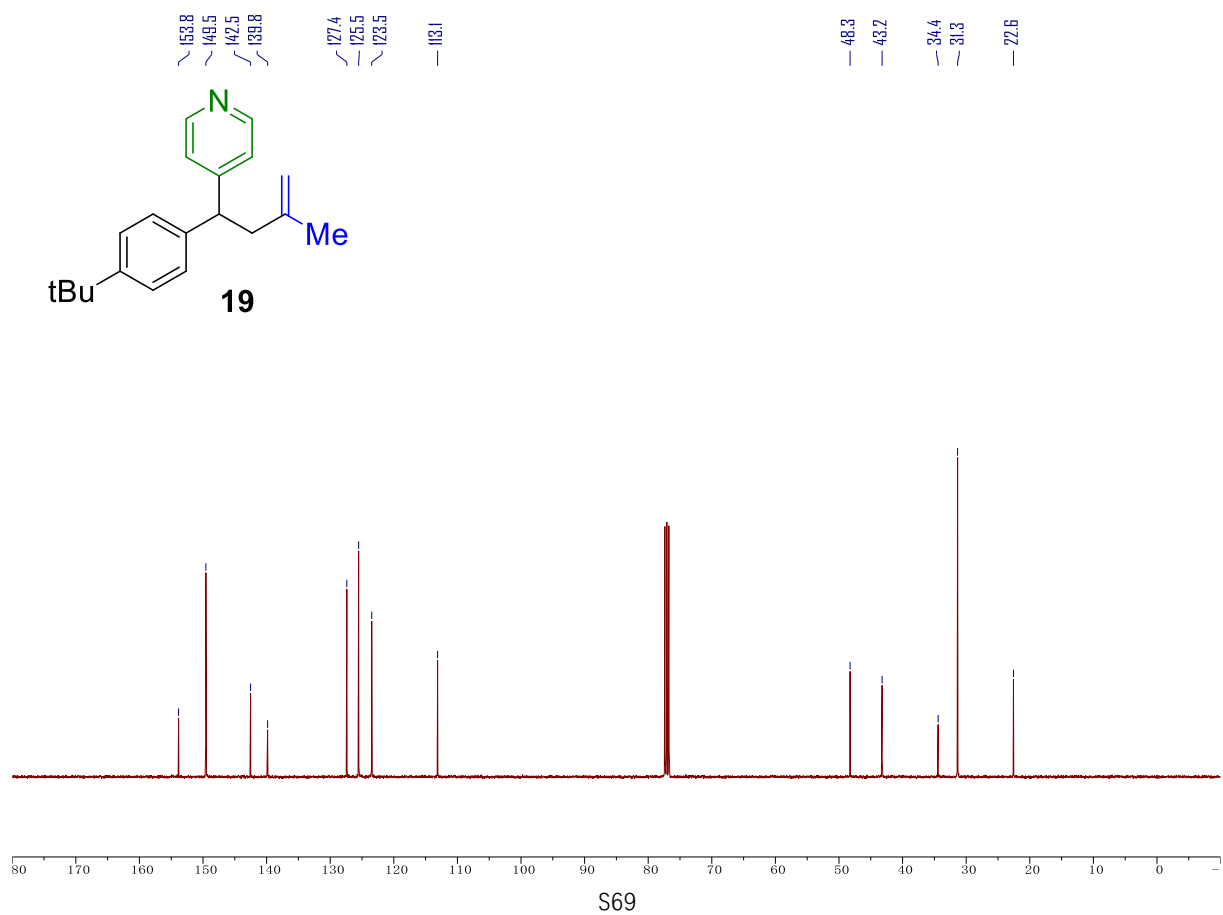

**<sup>1</sup>H NMR spectra of compound **20** (400 MHz, Chloroform-*d*)**

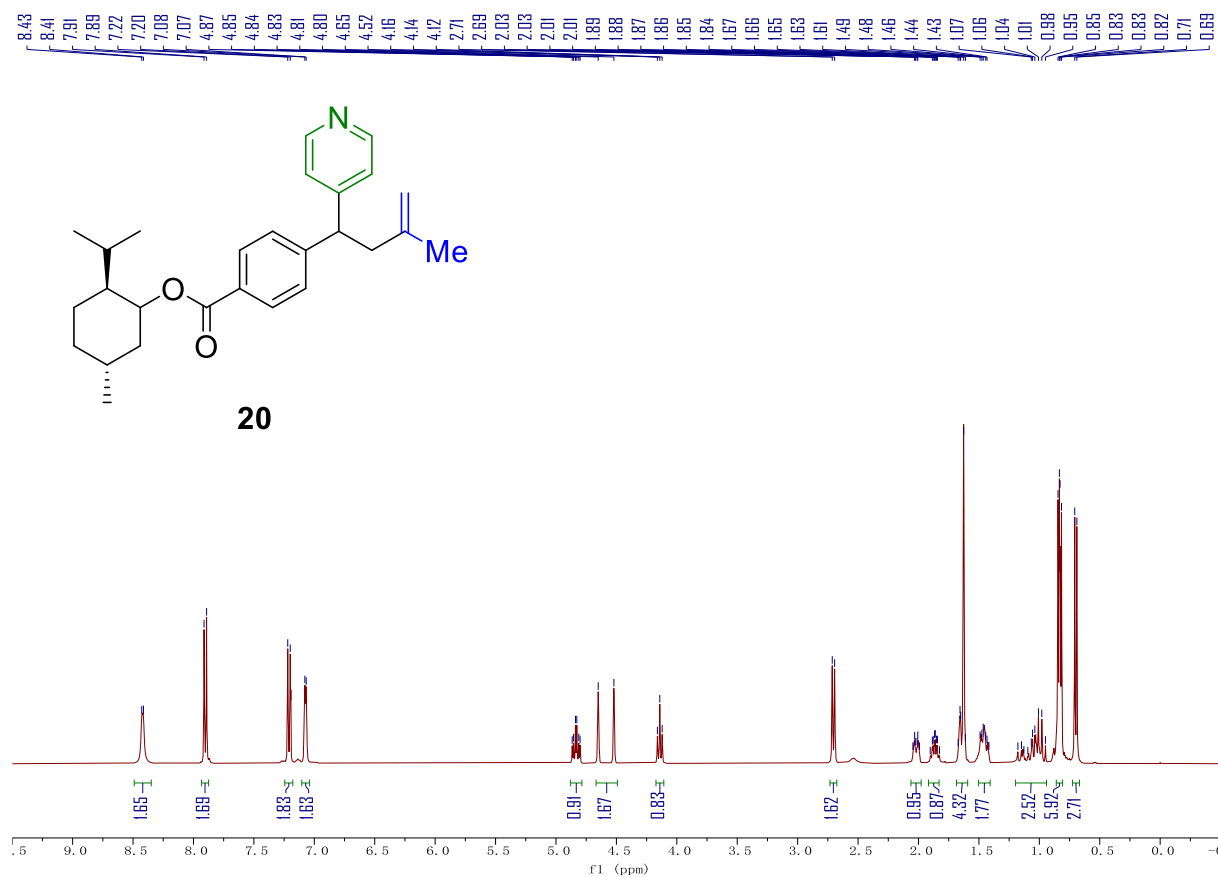

**<sup>13</sup>C NMR spectra of compound **20** (101 MHz, Chloroform-*d*)**

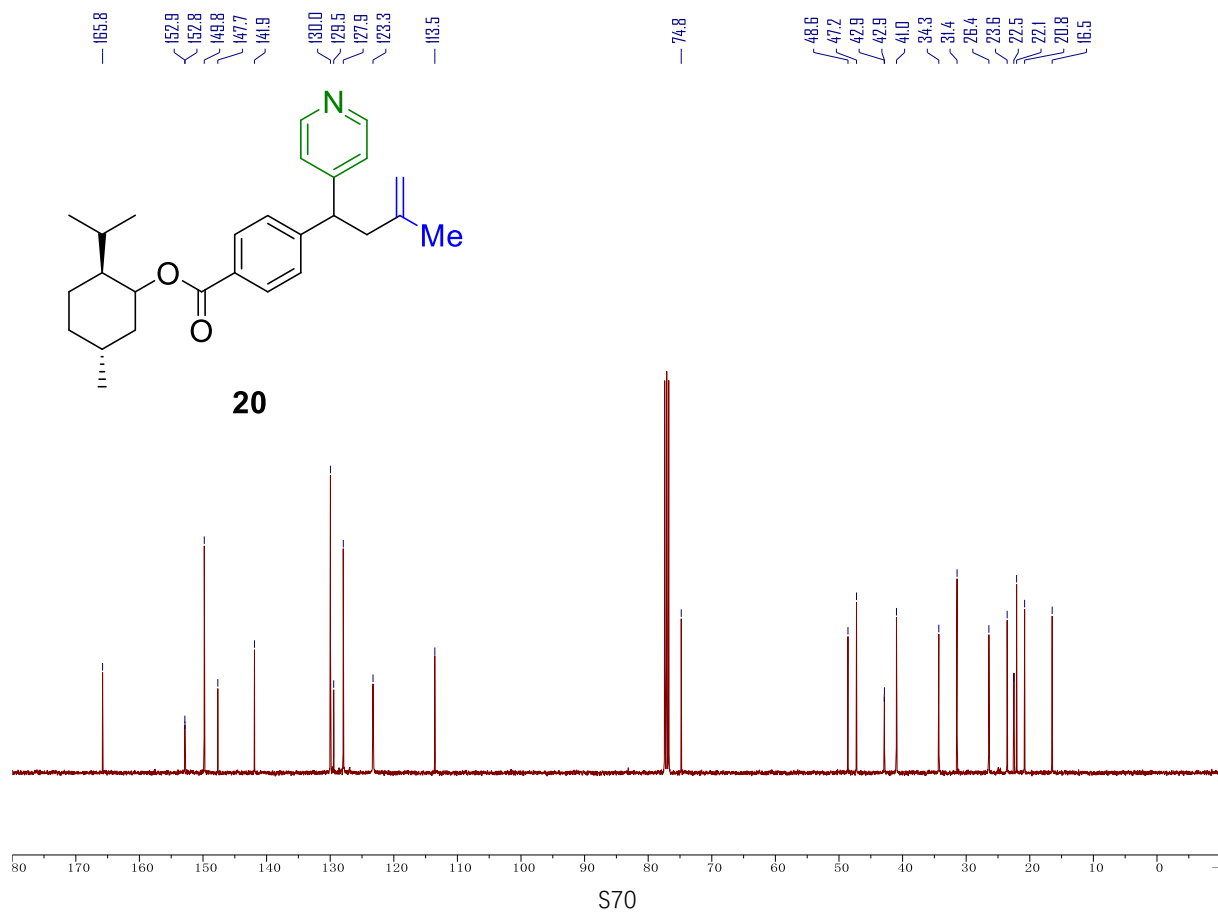

**<sup>1</sup>H NMR spectra of compound **21** (400 MHz, Chloroform-*d*)**

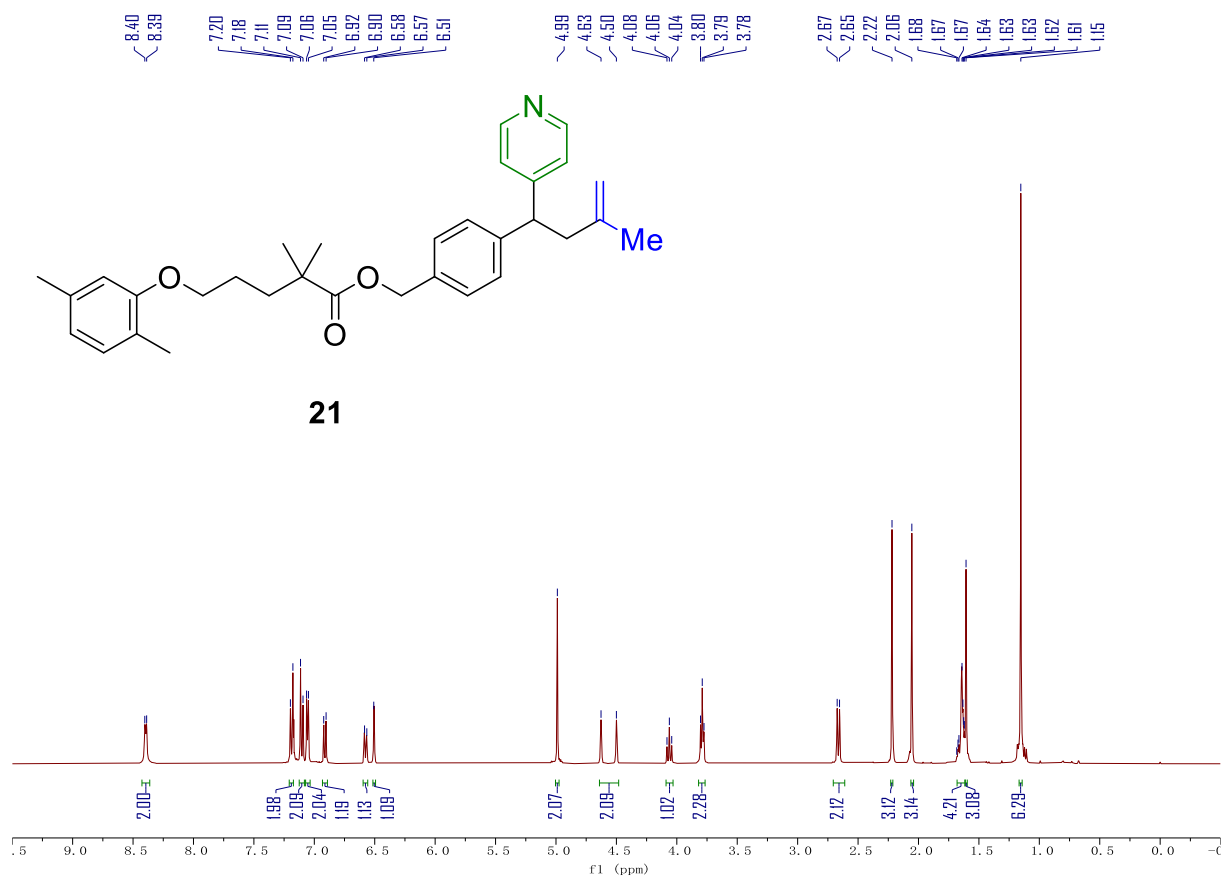

**<sup>13</sup>C NMR spectra of compound **21** (101 MHz, Chloroform-*d*)**

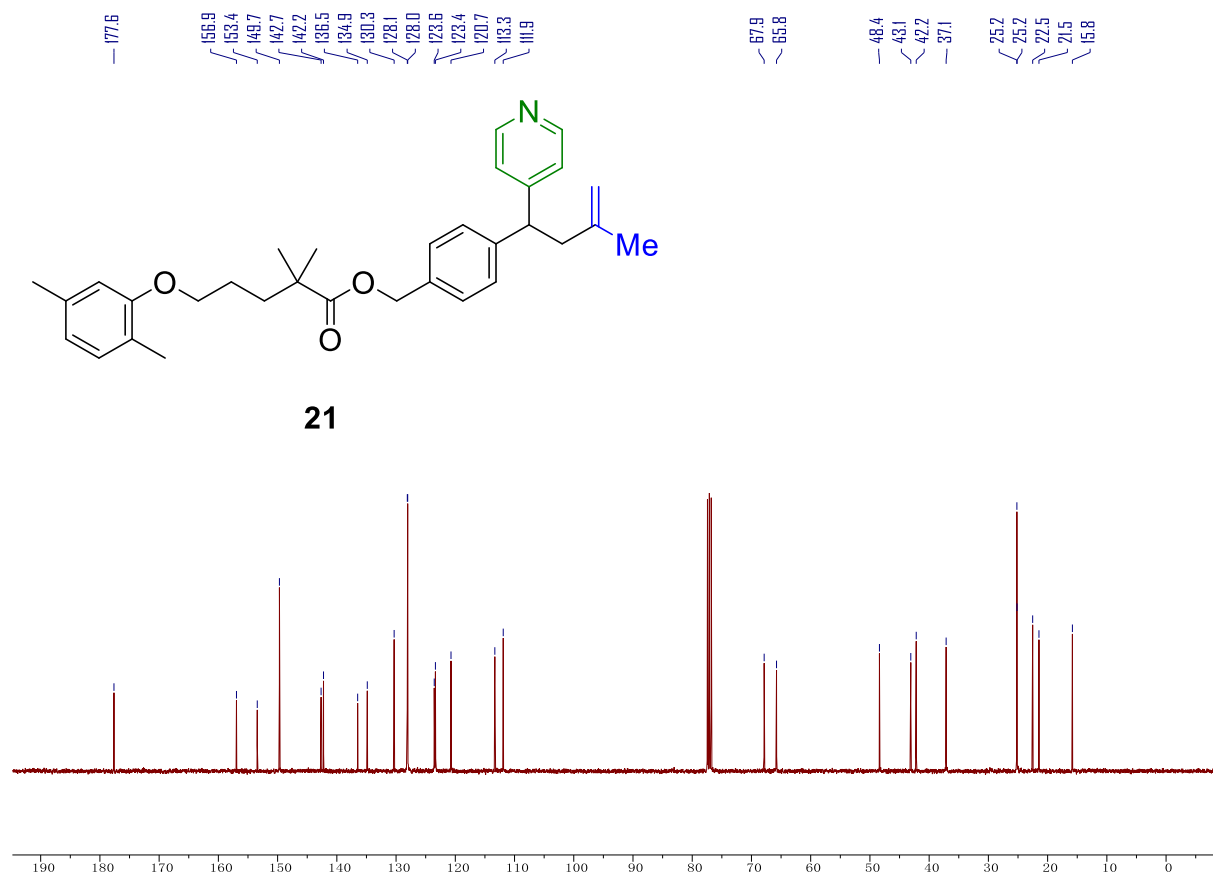

**<sup>1</sup>H NMR spectra of compound **22** (400 MHz, Chloroform-*d*)**

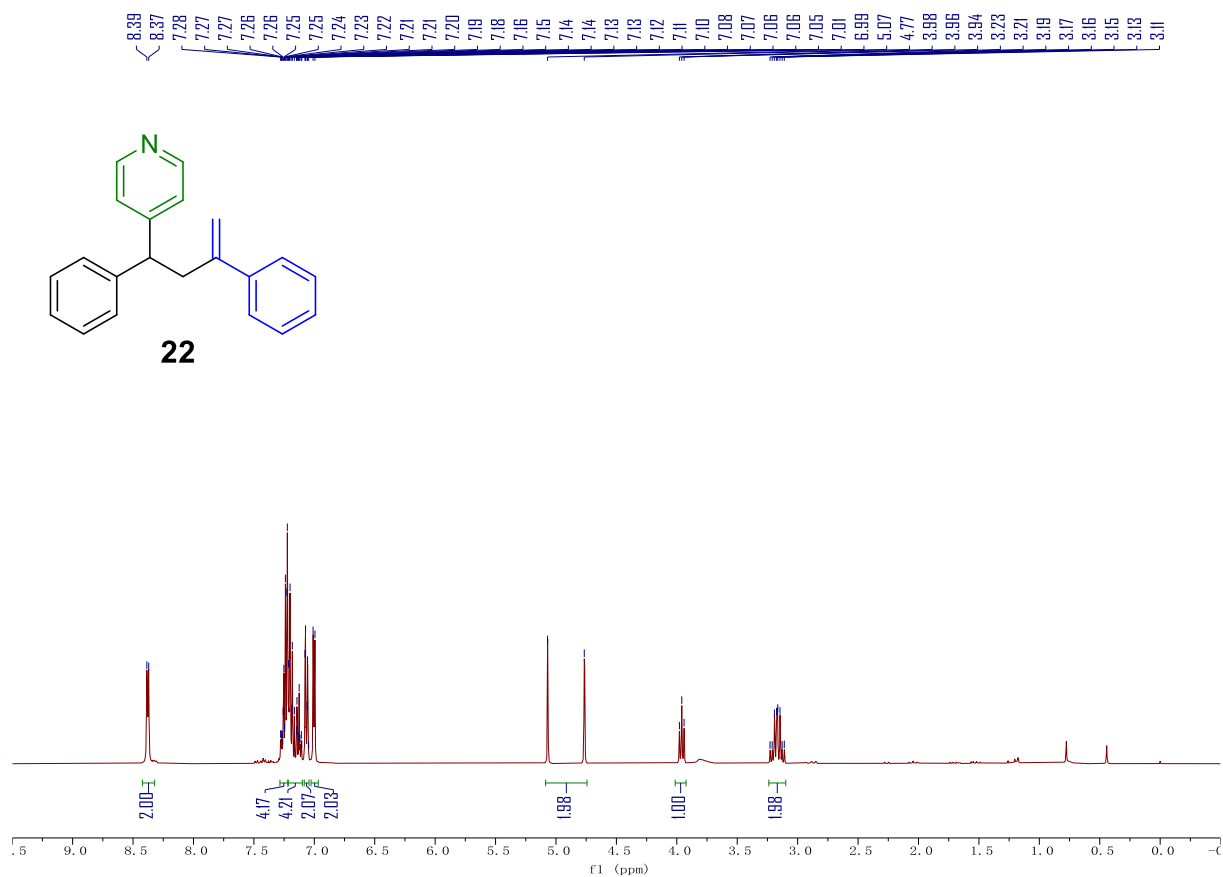

**<sup>13</sup>C NMR spectra of compound **22** (101 MHz, Chloroform-*d*)**

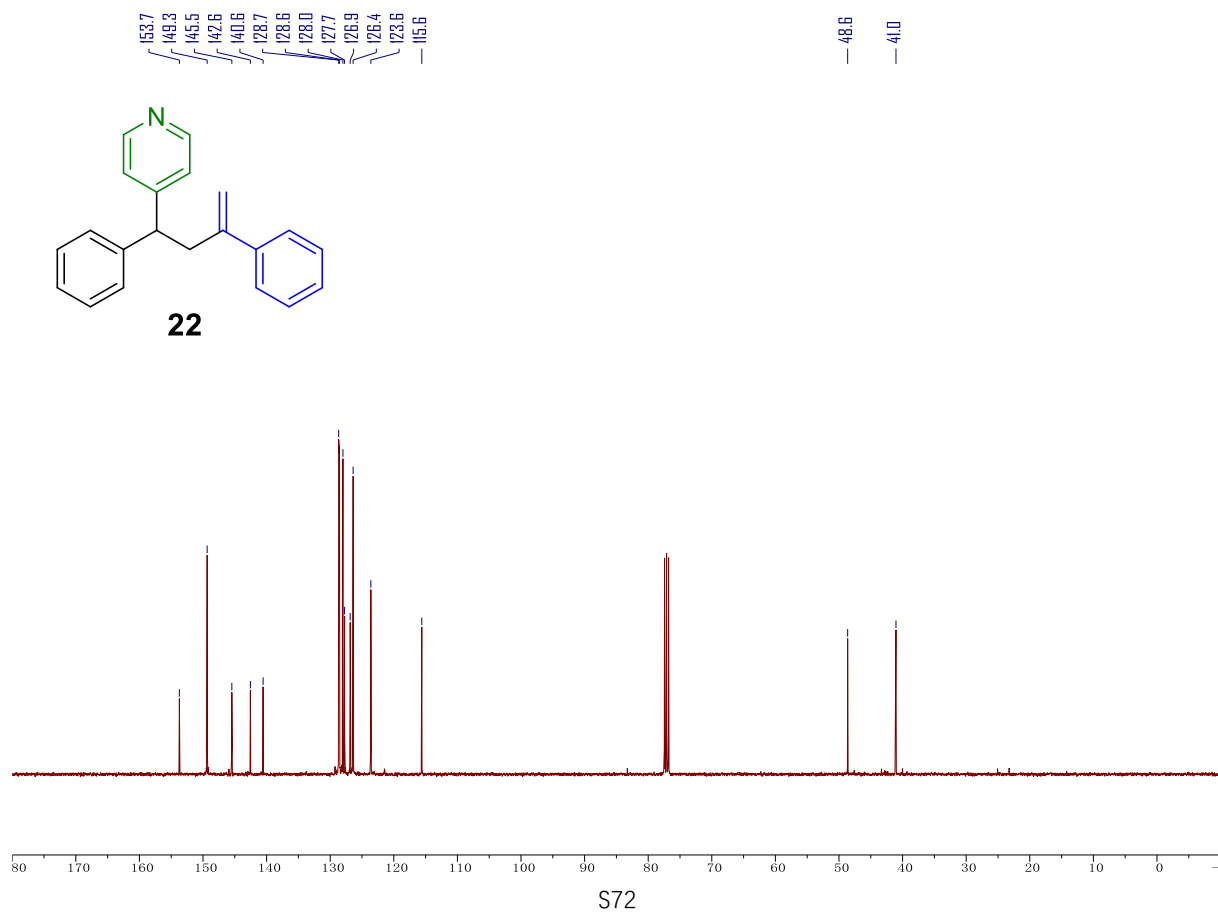



**<sup>1</sup>H NMR spectra of compound 23 (400 MHz, Chloroform-*d*)**

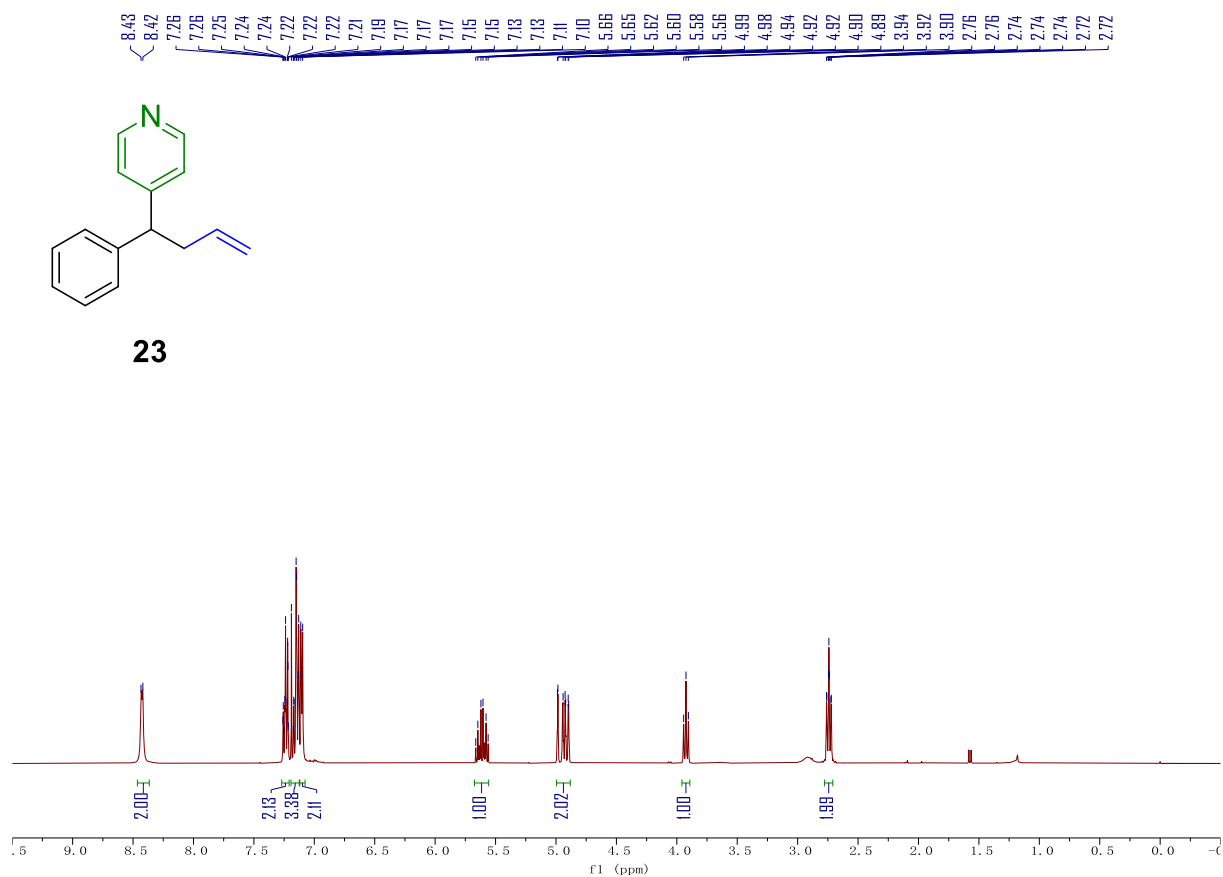

**<sup>13</sup>C NMR spectra of compound 23 (101 MHz, Chloroform-*d*)**

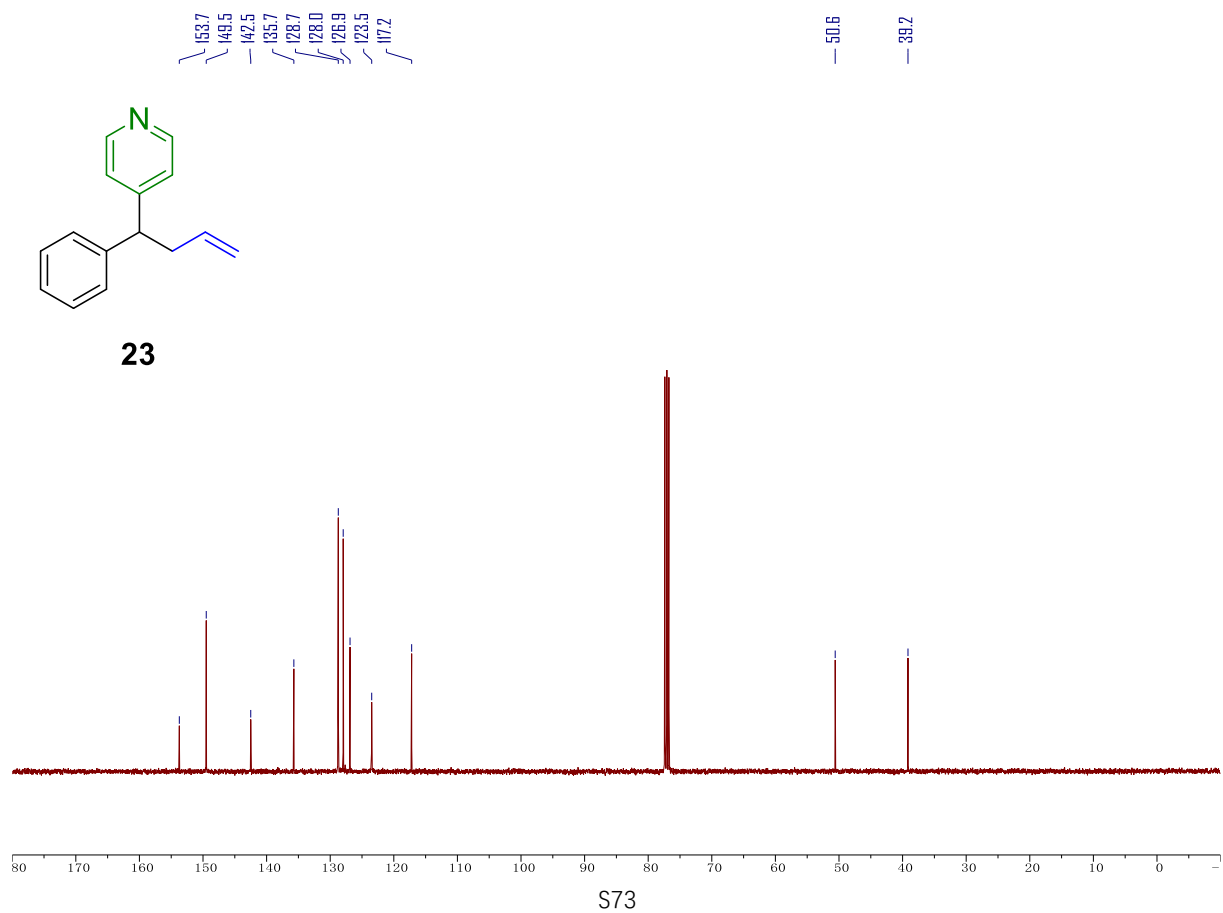

**<sup>1</sup>H NMR spectra of compound **24** (400 MHz, Chloroform-*d*)**

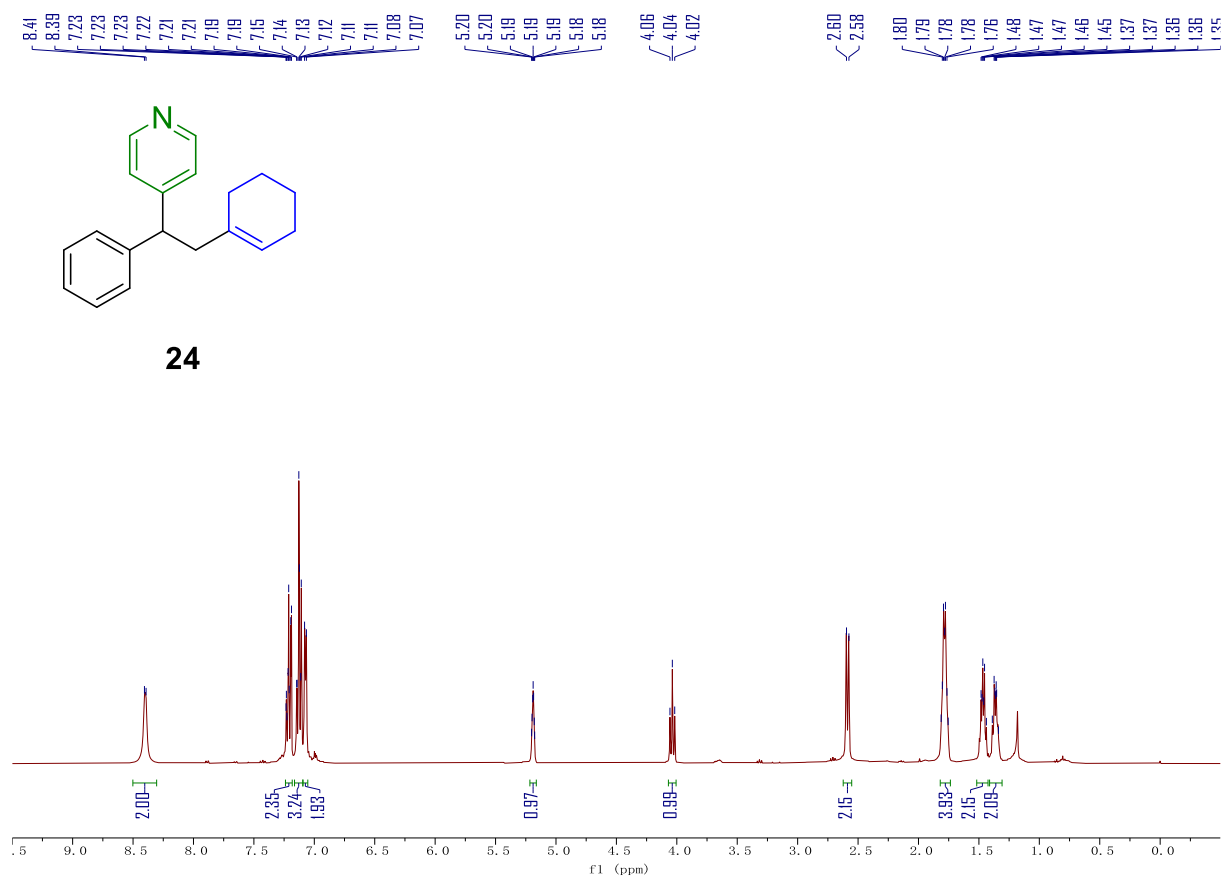

**<sup>13</sup>C NMR spectra of compound **24** (101 MHz, Chloroform-*d*)**

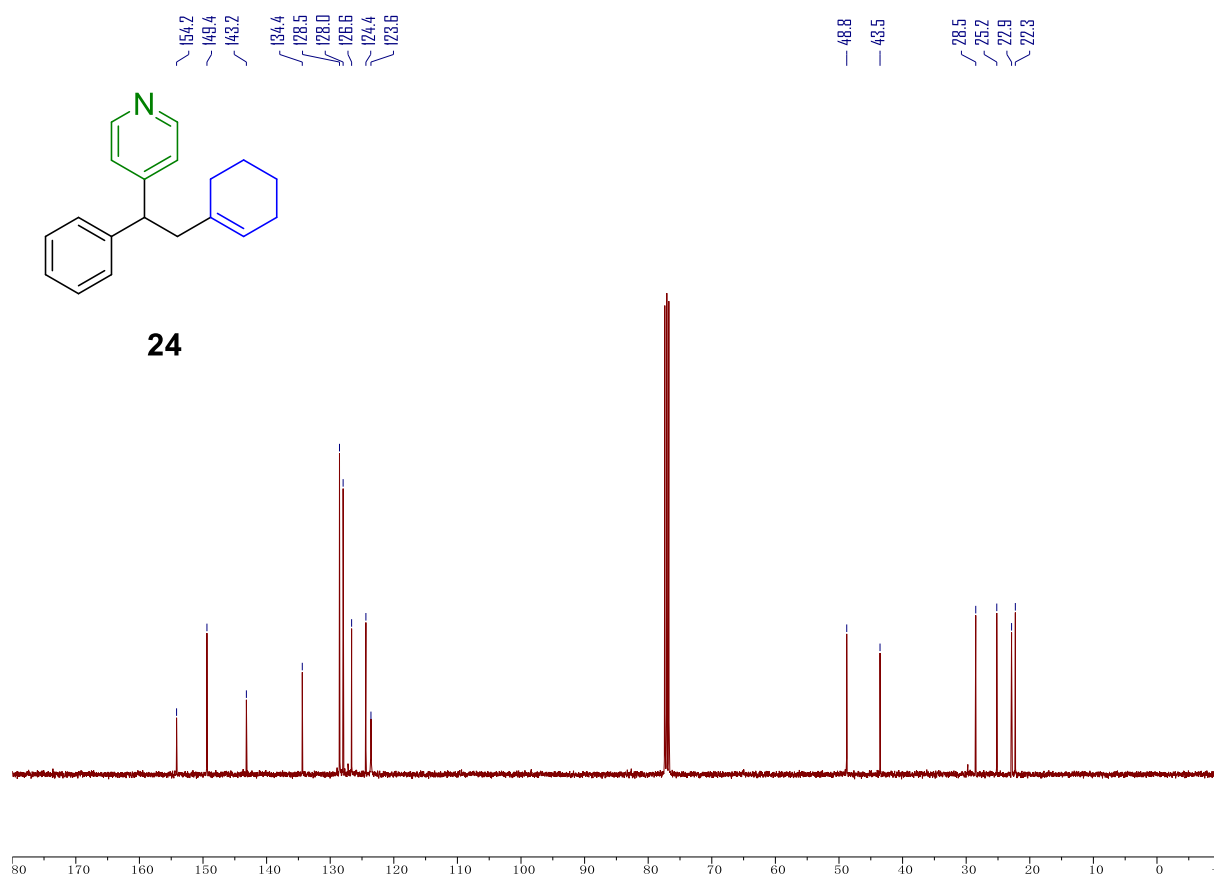

**$^1\text{H}$  NMR spectra of compound **25** (400 MHz, Chloroform-*d*)**

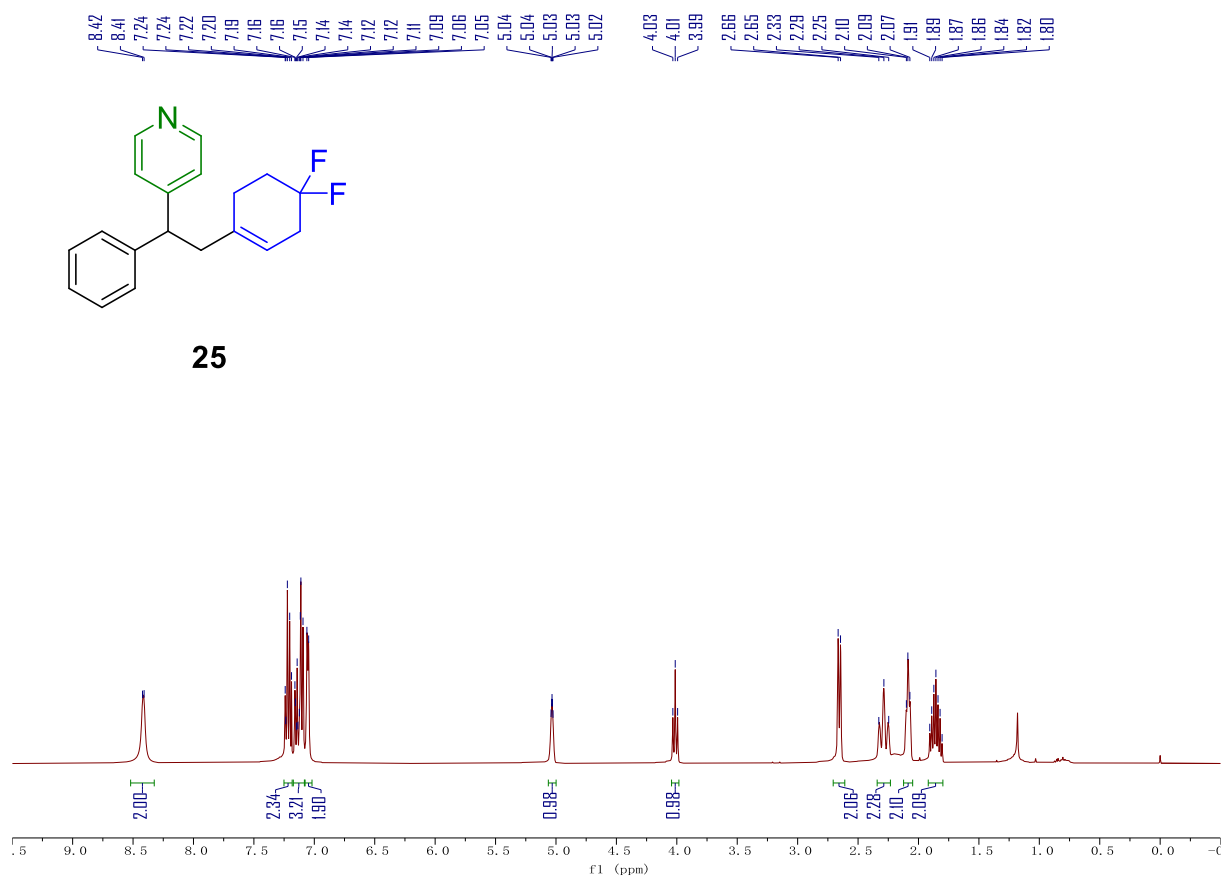

**$^{13}\text{C}$  NMR spectra of compound **25** (101 MHz, Chloroform-*d*)**

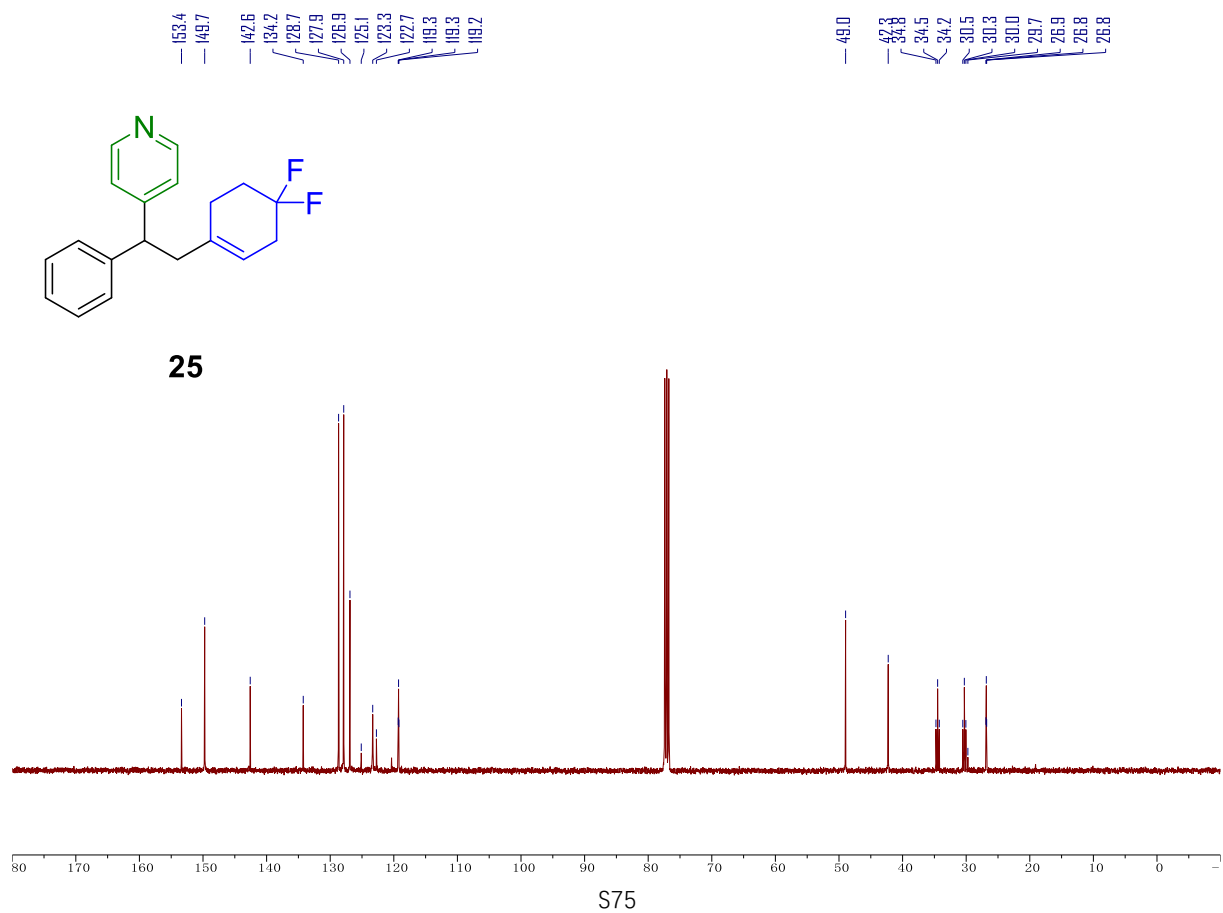

**$^{19}\text{F}$  NMR spectra of compound **25** (376 MHz, Chloroform-*d*)**

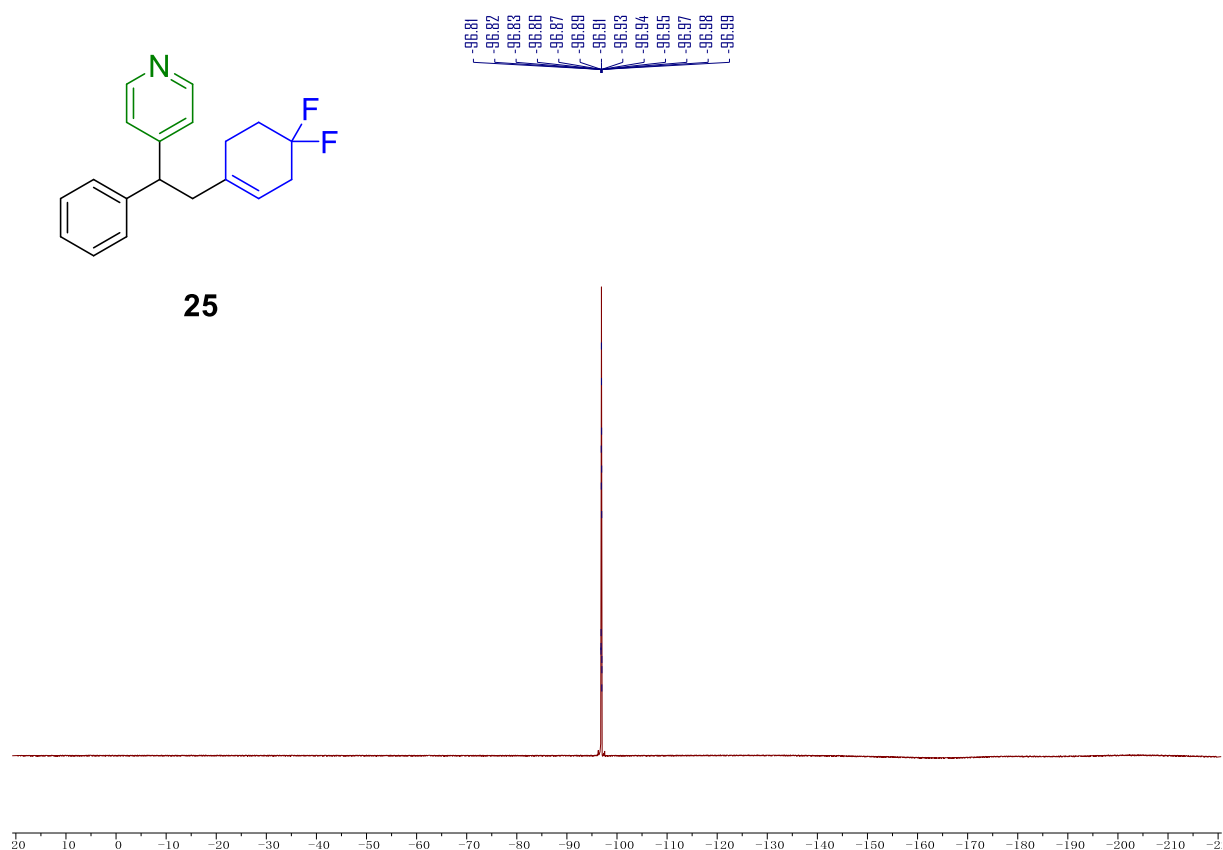

**$^1\text{H}$  NMR spectra of compound **26** (400 MHz, Chloroform-*d*)**

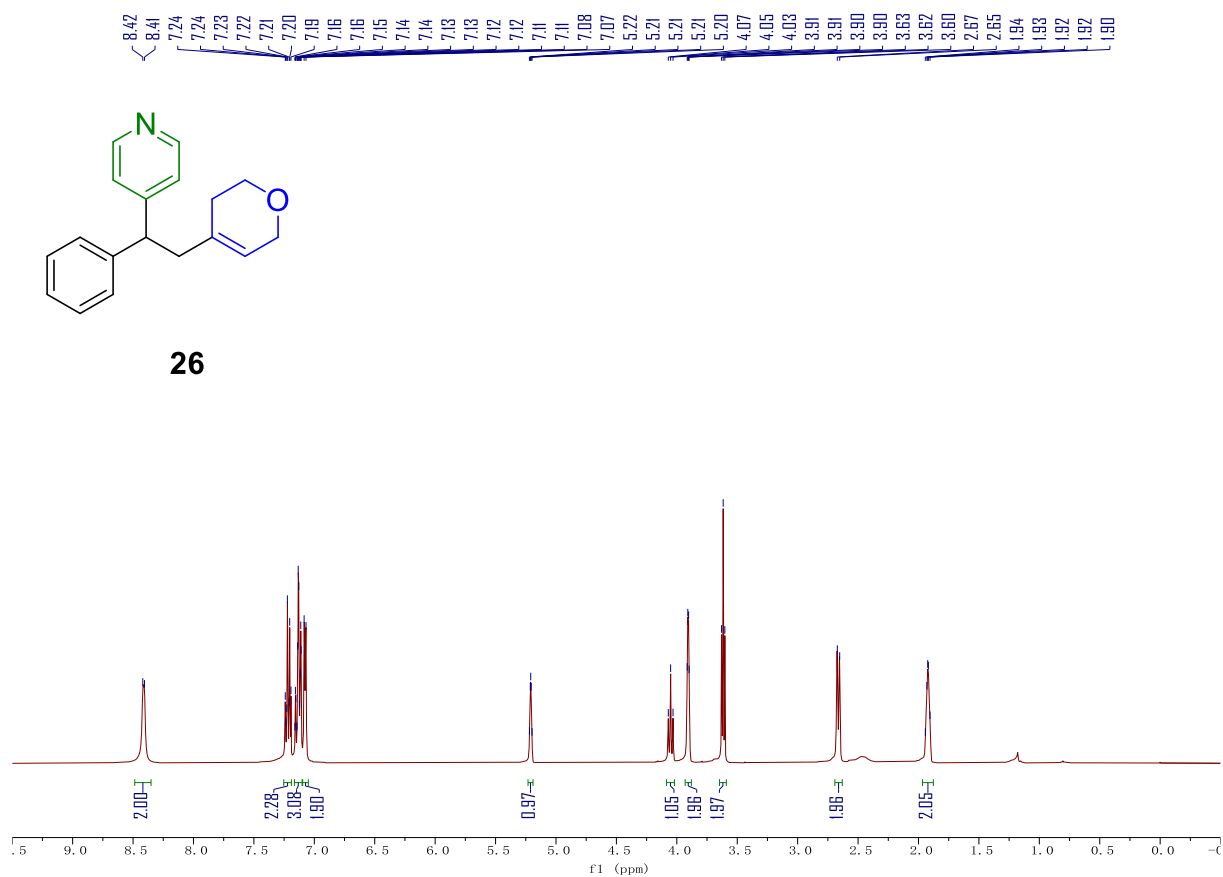

**$^{13}\text{C}$  NMR spectra of compound **26** (101 MHz, Chloroform-*d*)**

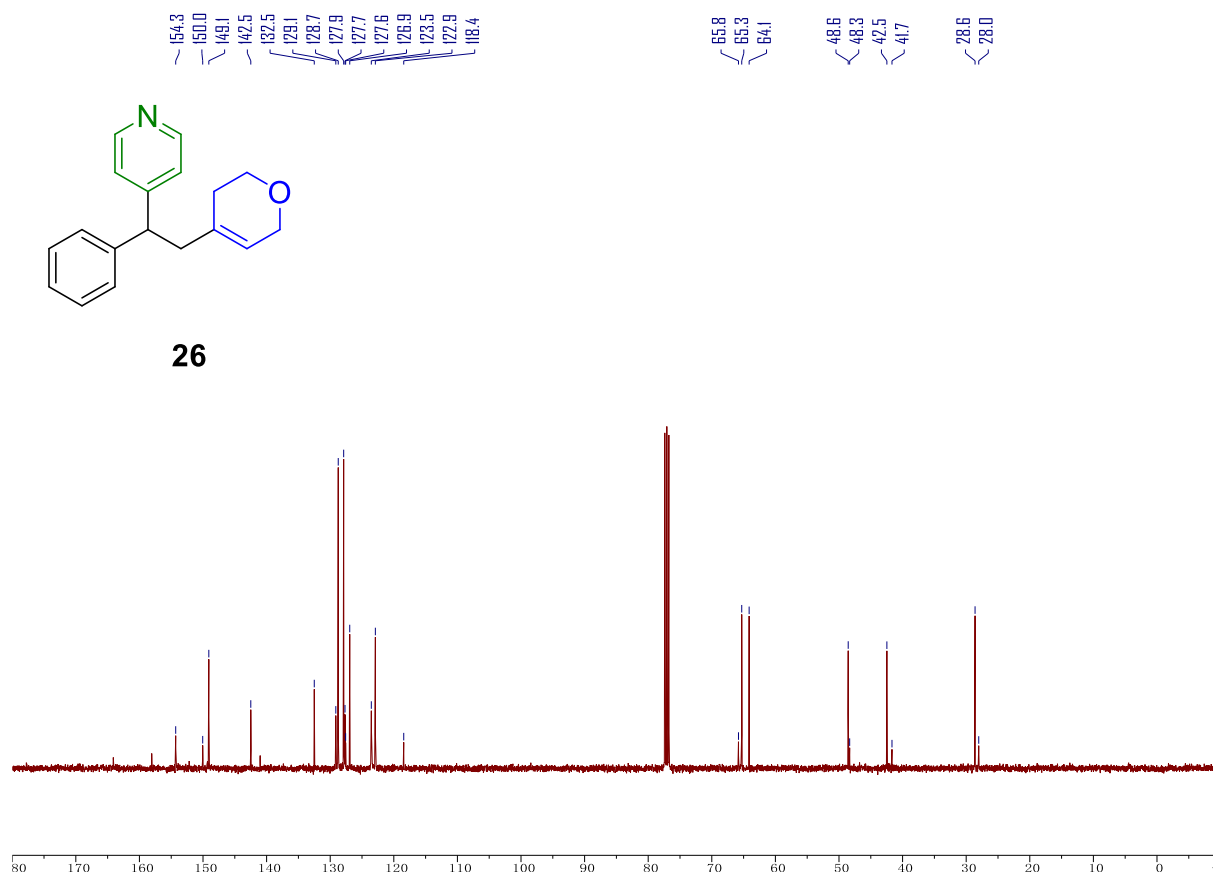

**$^1\text{H}$  NMR spectra of compound **27** (400 MHz, Chloroform-*d*)**

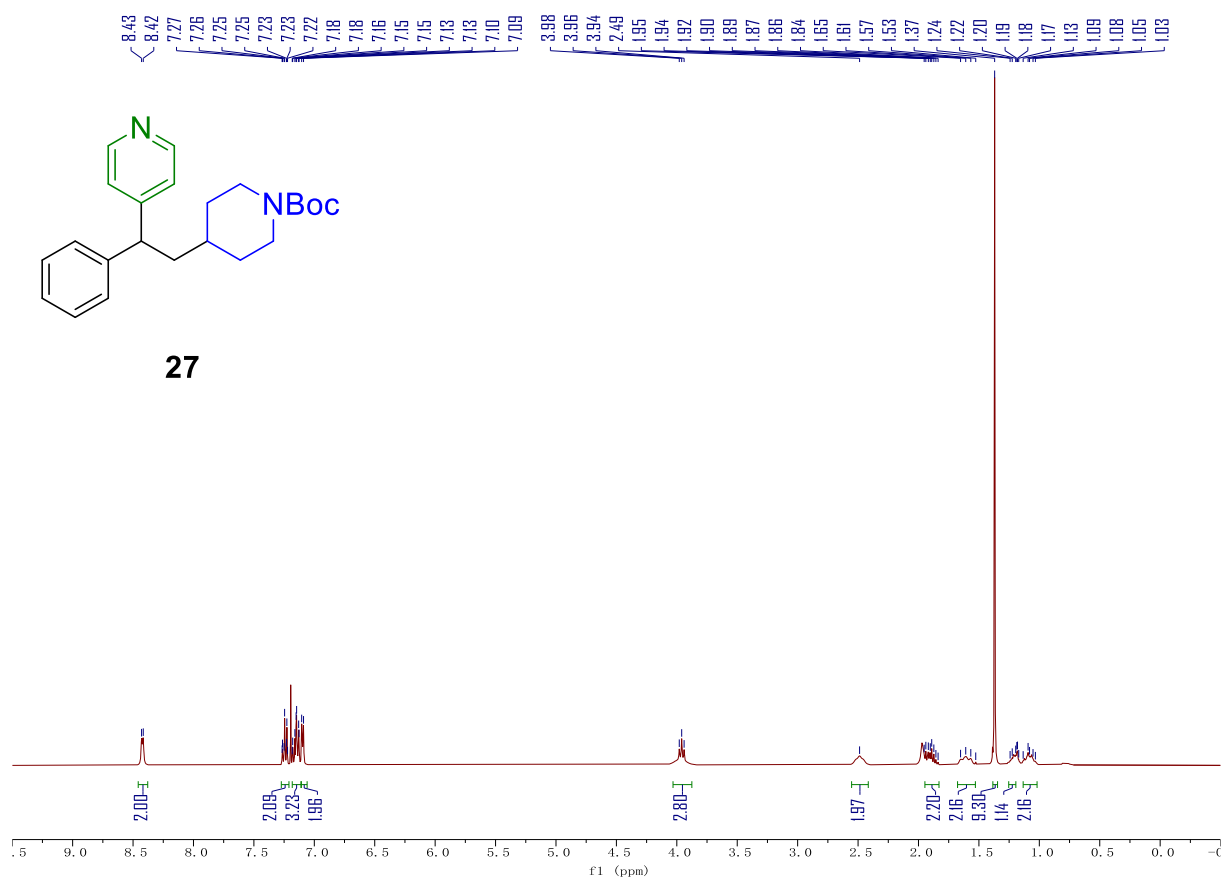

**$^{13}\text{C}$  NMR spectra of compound **27** (101 MHz, Chloroform-*d*)**

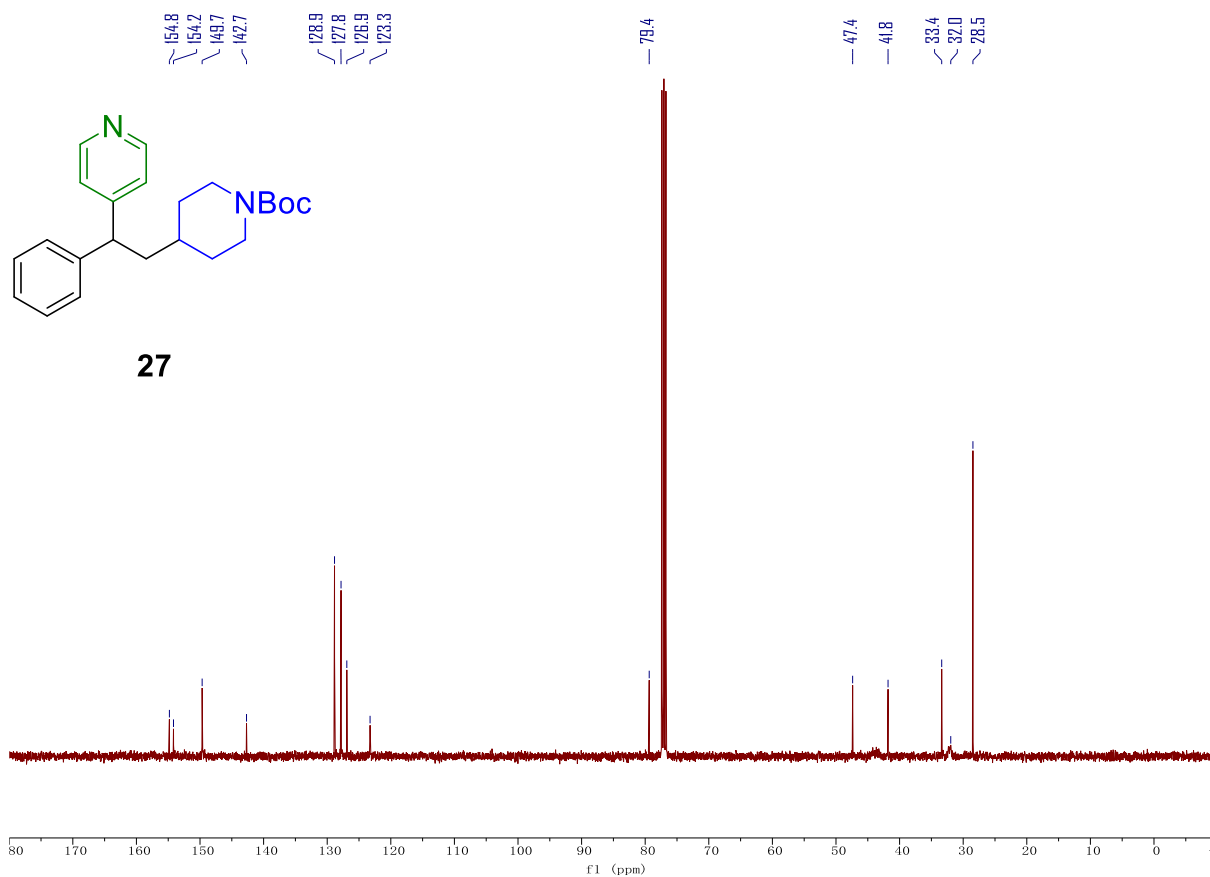

**$^1\text{H}$  NMR spectra of compound **28** (400 MHz, Chloroform-*d*)**

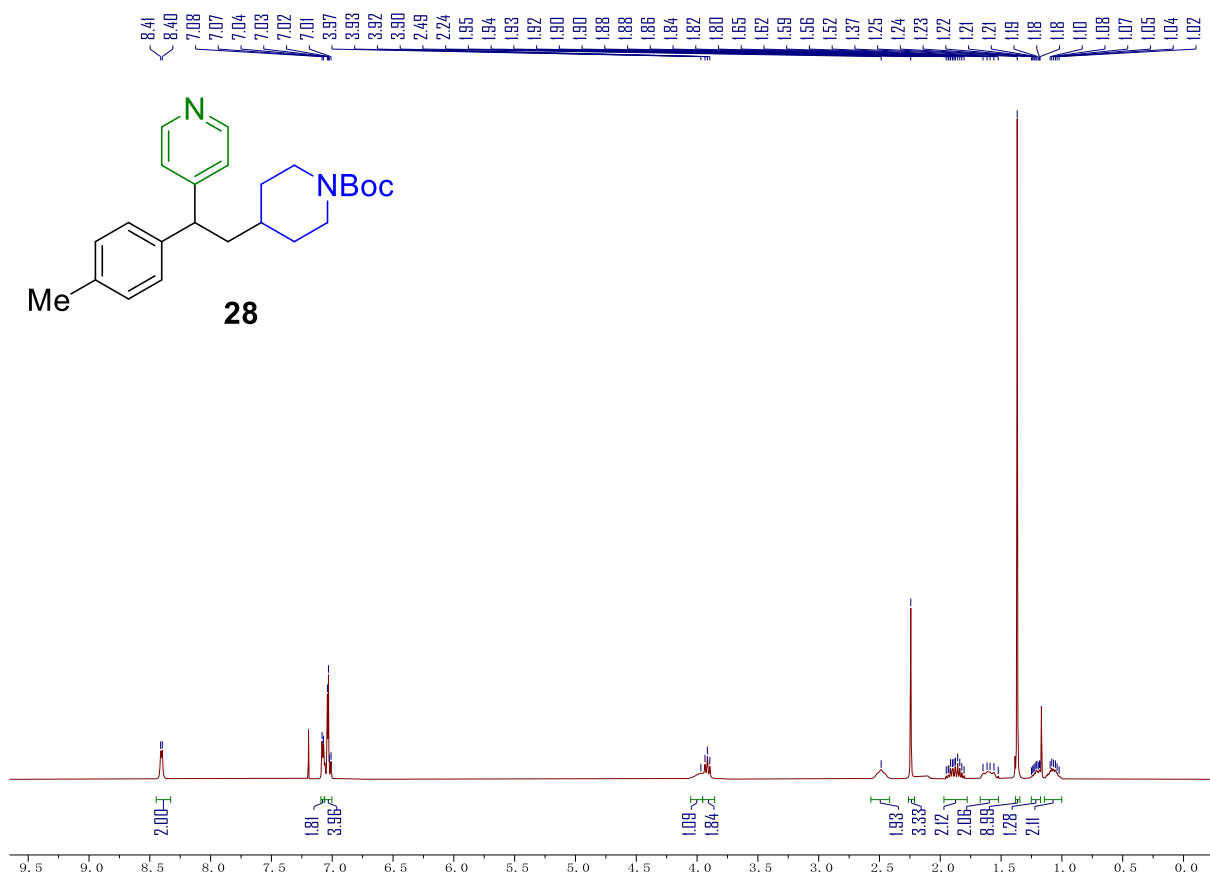

**$^{13}\text{C}$  NMR spectra of compound **28** (101 MHz, Chloroform-*d*)**

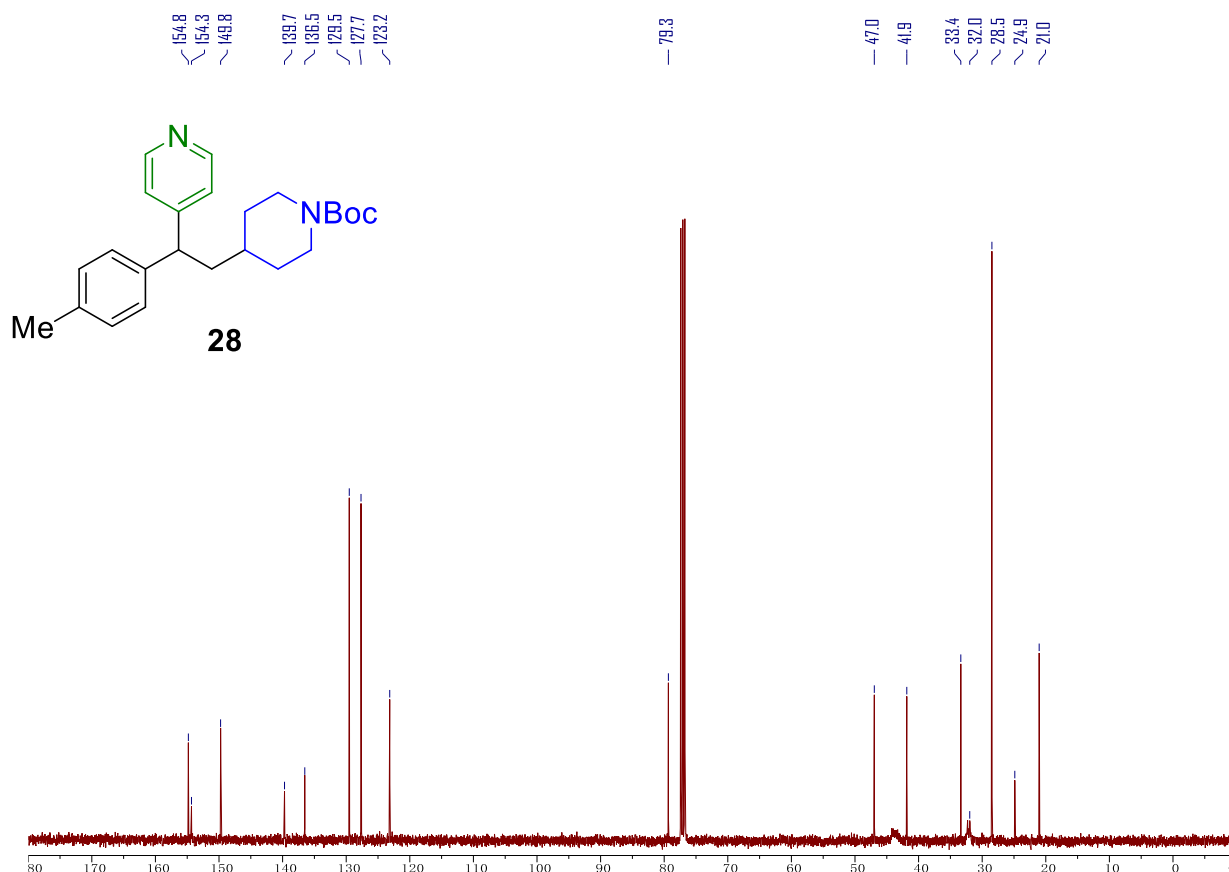

**$^1\text{H}$  NMR spectra of compound **29** (400 MHz, Chloroform-*d*)**

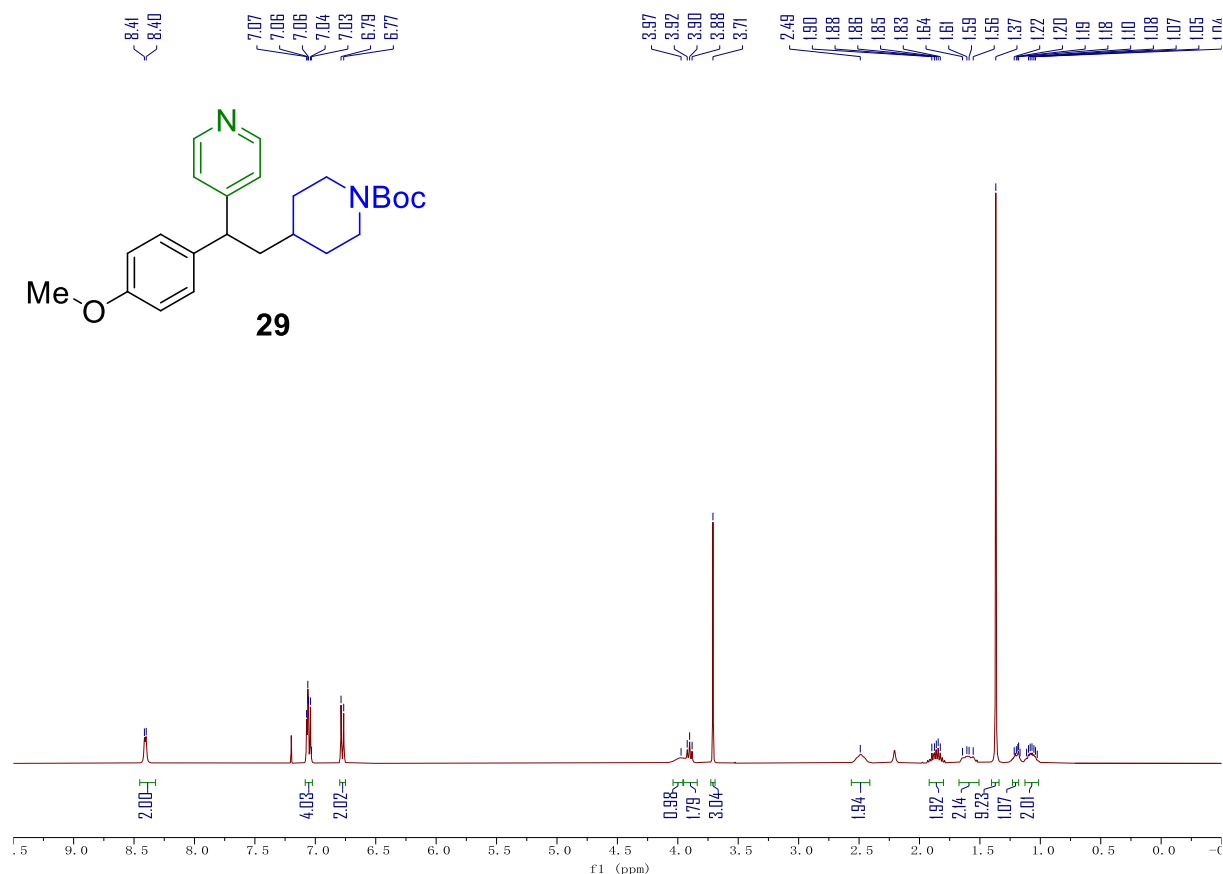

**$^{13}\text{C}$  NMR spectra of compound **29** (101 MHz, Chloroform-*d*)**

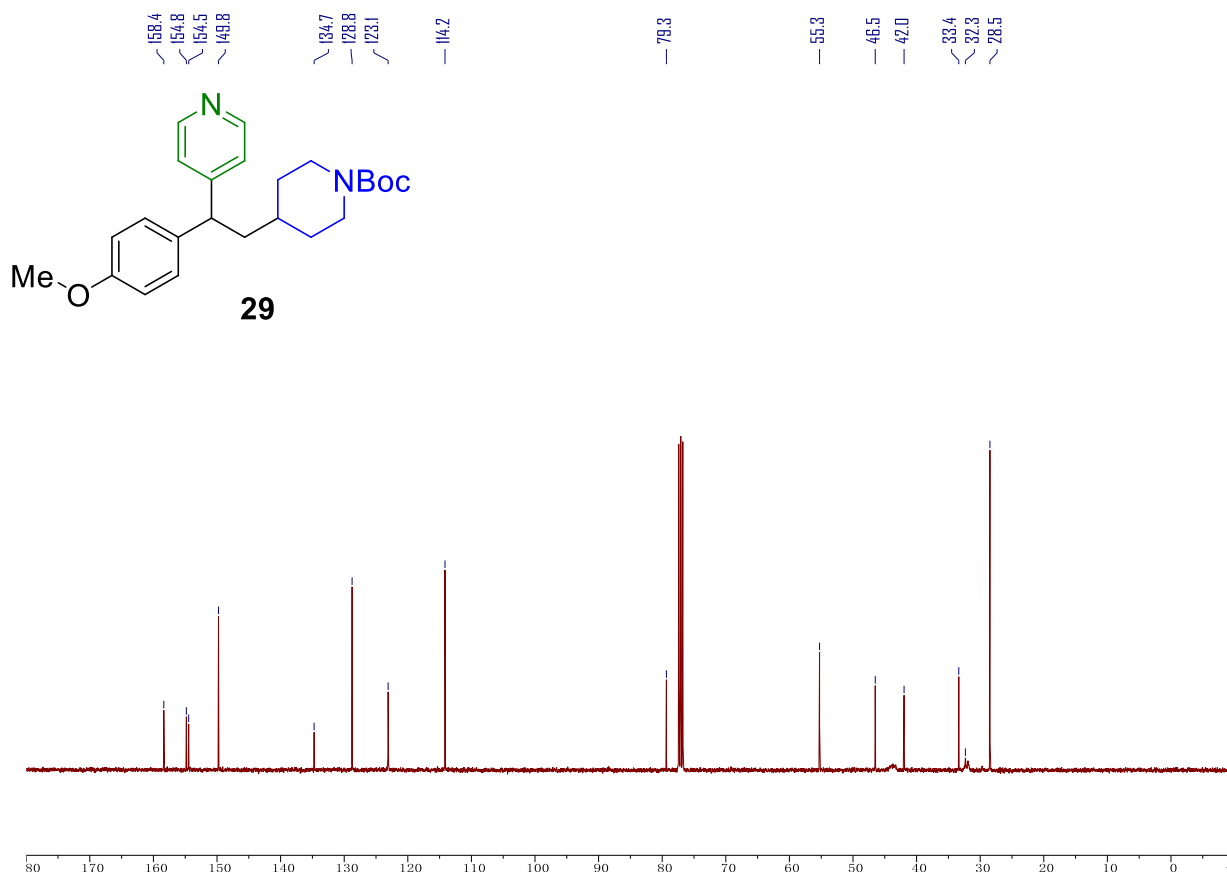

**$^1\text{H}$  NMR spectra of compound **30** (400 MHz, Chloroform-*d*)**

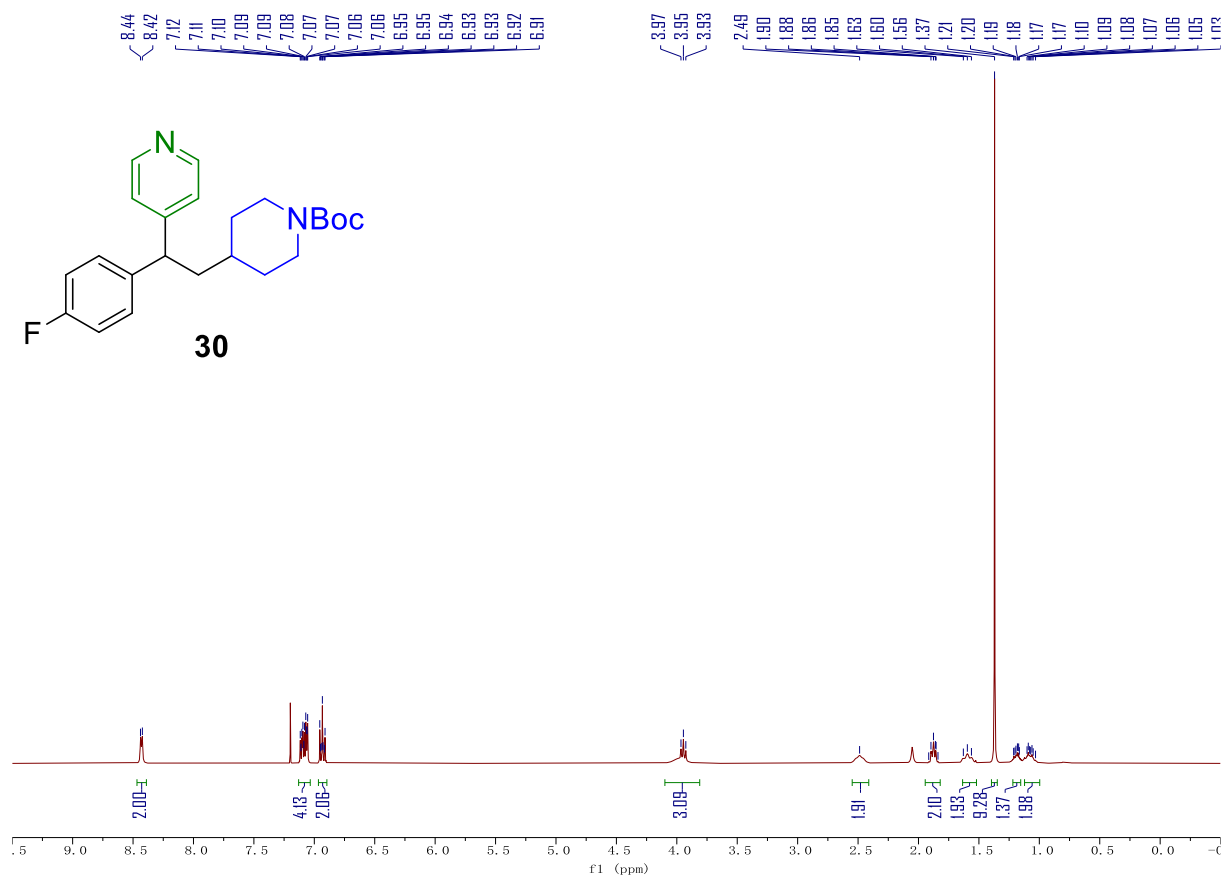



**<sup>13</sup>C NMR spectra of compound **30** (101 MHz, Chloroform-*d*)**

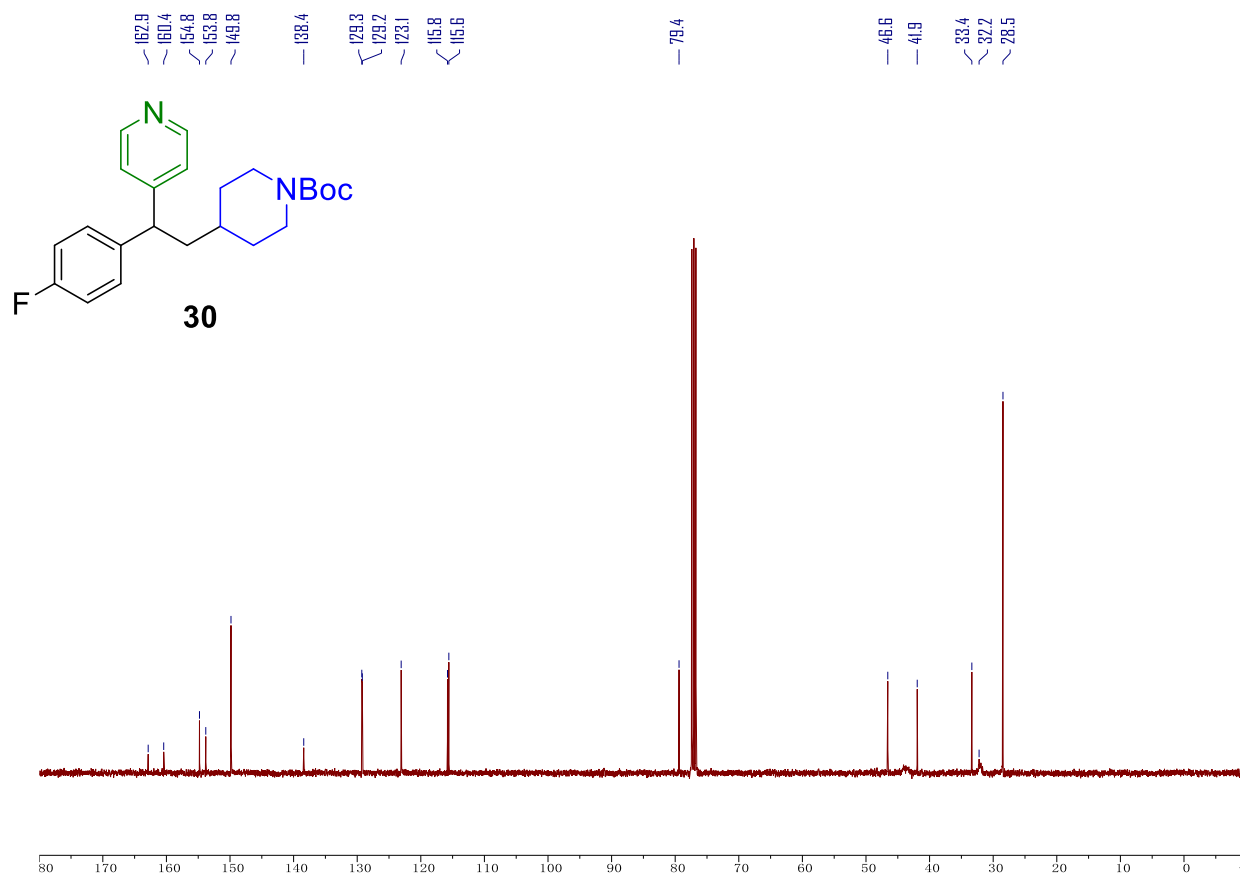

**<sup>19</sup>F NMR spectra of compound **30** (376 MHz, Chloroform-*d*)**

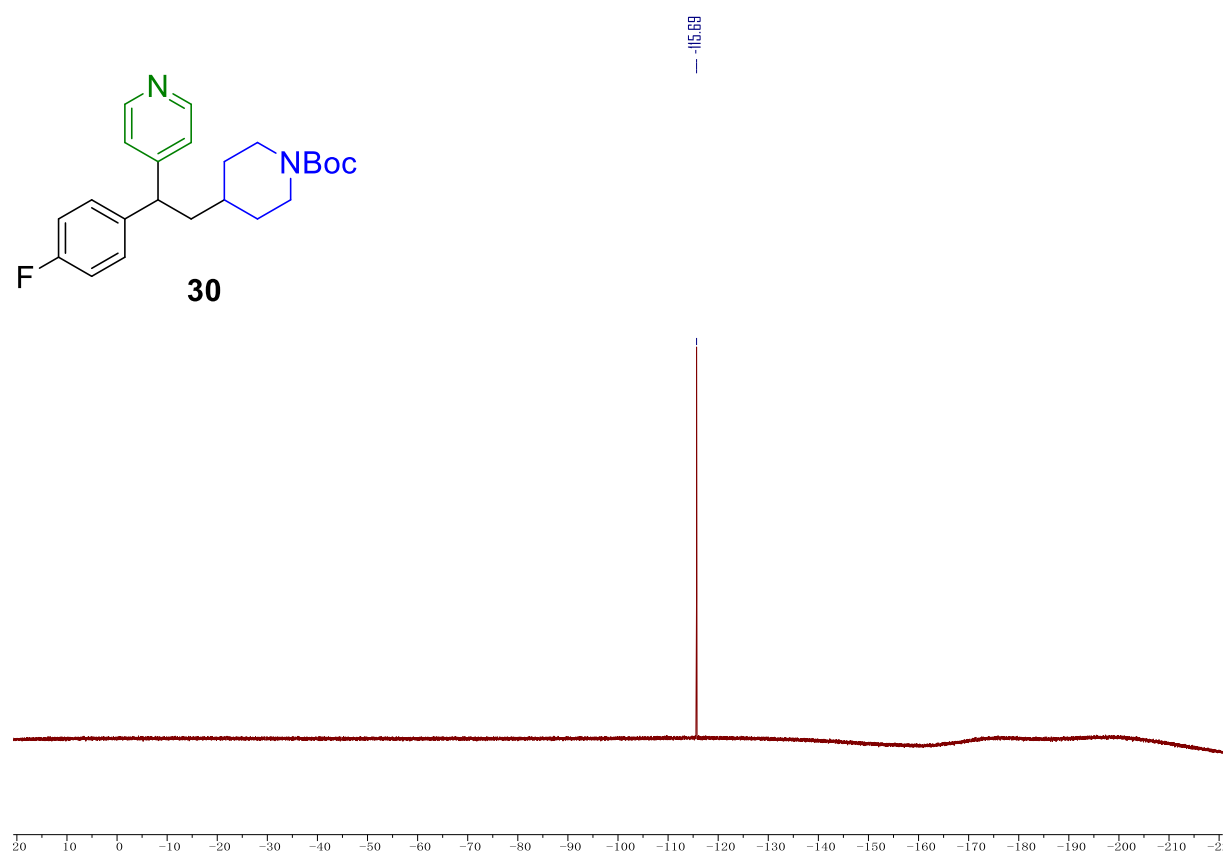

**<sup>1</sup>H NMR spectra of compound **31** (400 MHz, Chloroform-*d*)**

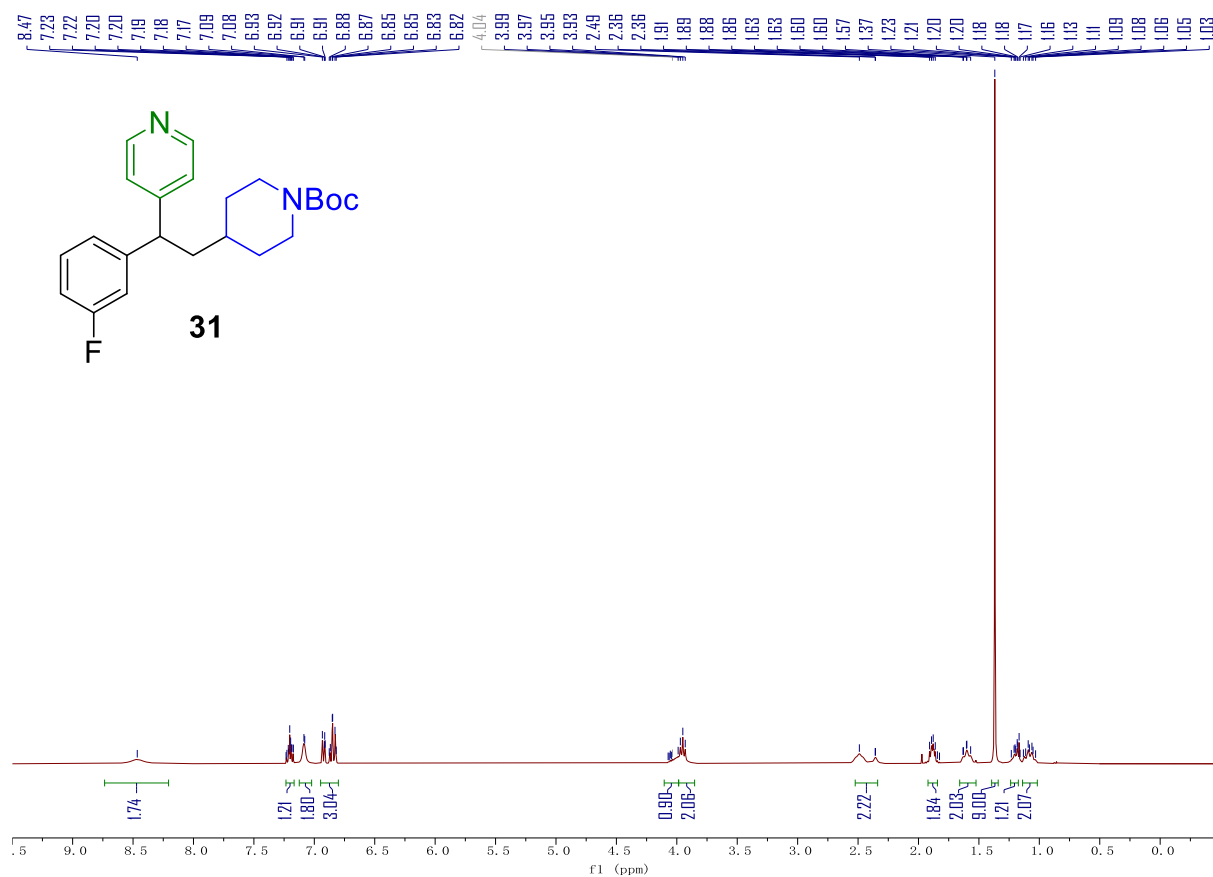

**<sup>13</sup>C NMR spectra of compound **31** (101 MHz, Chloroform-*d*)**

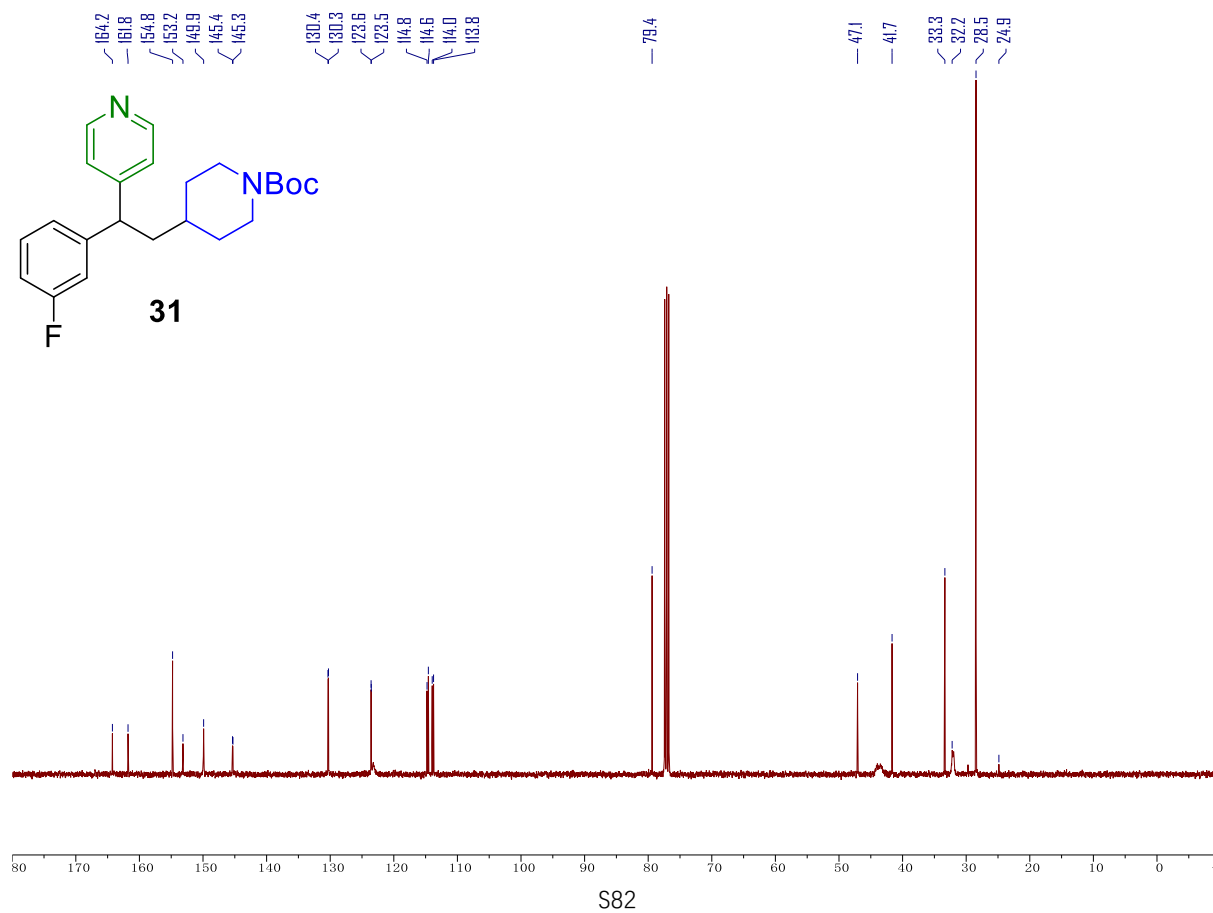

**$^{19}\text{F}$  NMR spectra of compound **31** (376 MHz, Chloroform-*d*)**

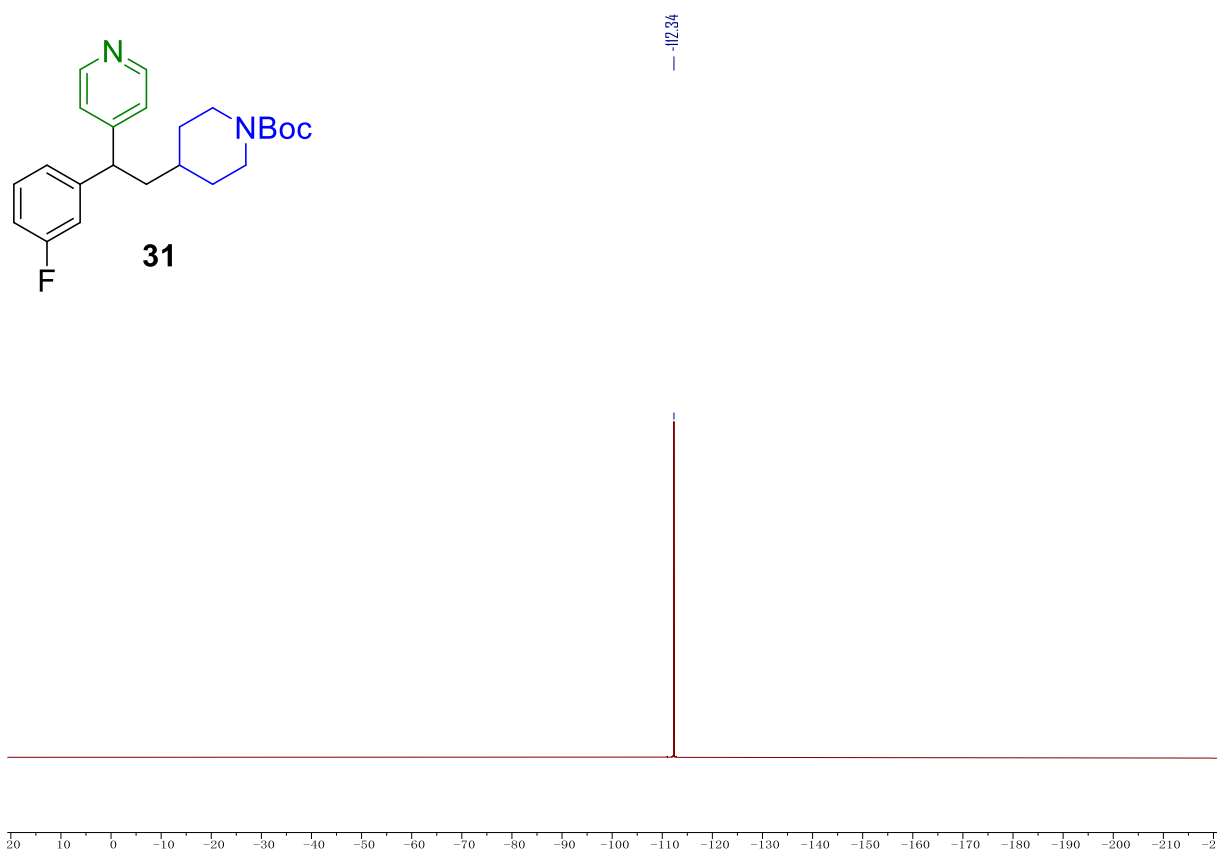

**$^1\text{H}$  NMR spectra of compound **32** (400 MHz, Chloroform-*d*)**

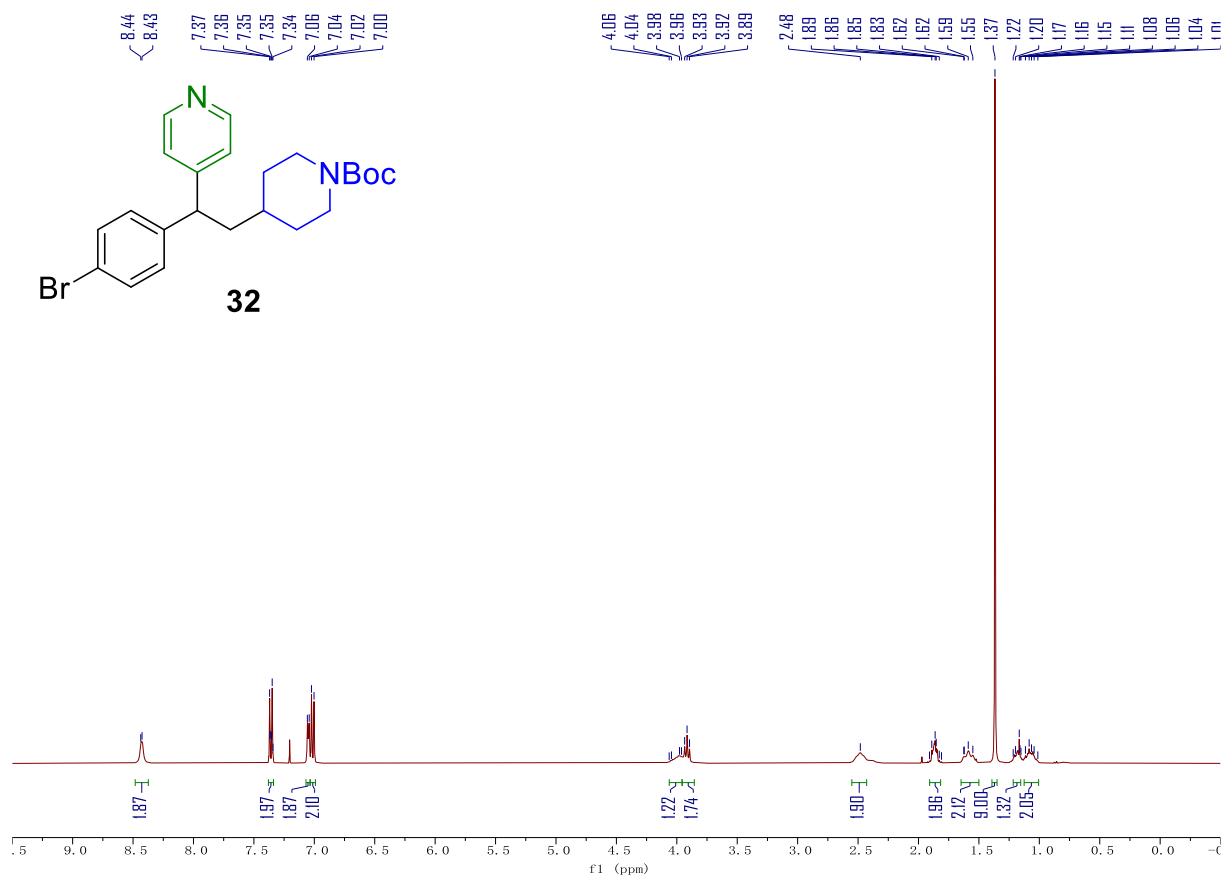

**$^{13}\text{C}$  NMR spectra of compound **32** (101 MHz, Chloroform-*d*)**

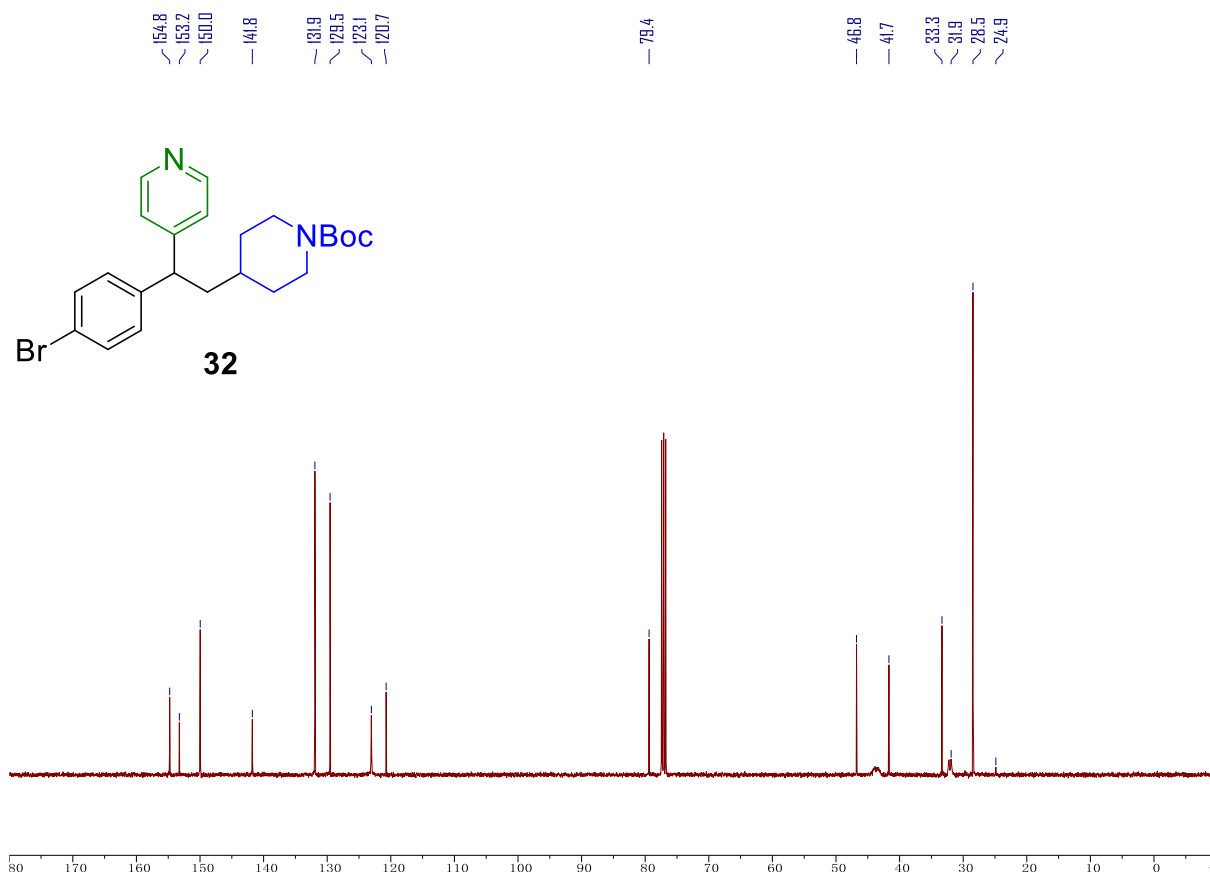

**$^1\text{H}$  NMR spectra of compound **33** (400 MHz, Chloroform-*d*)**

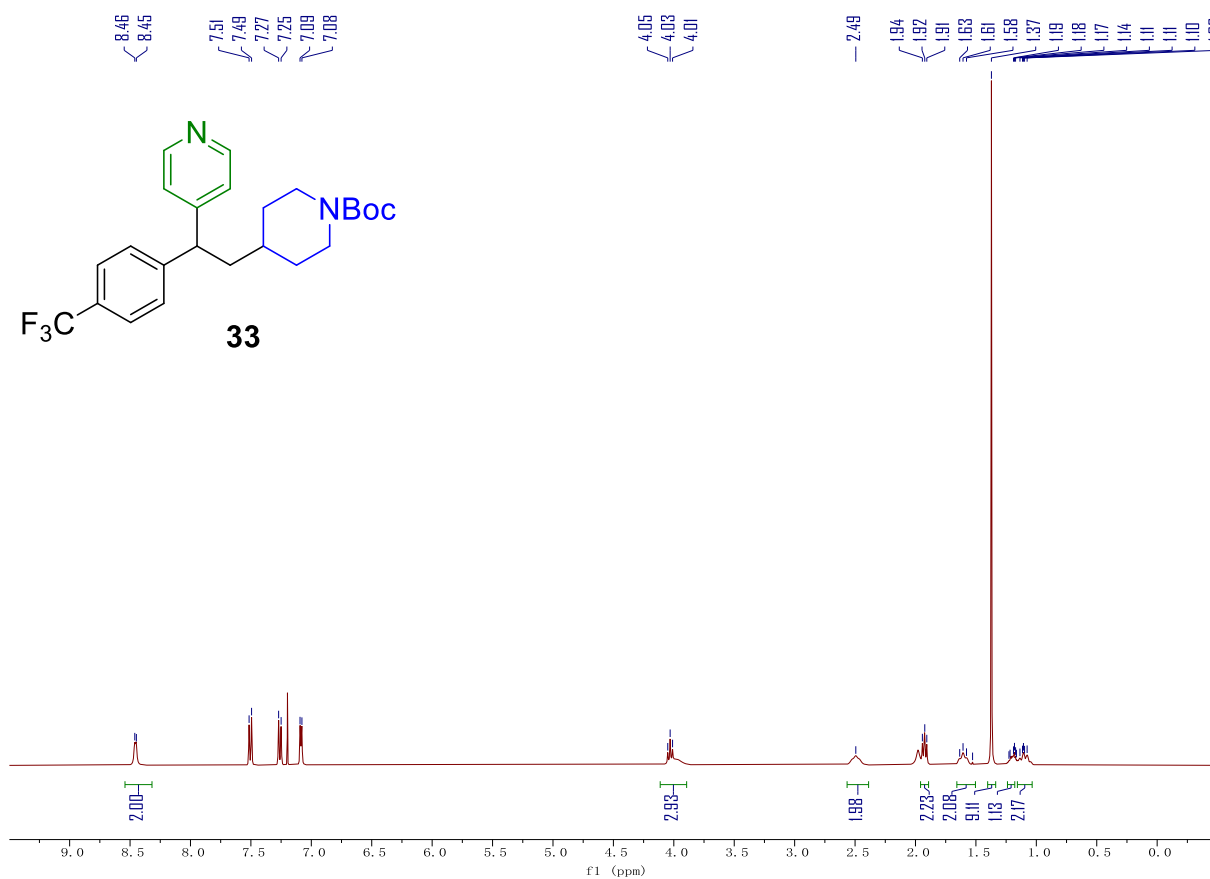

**$^{13}\text{C}$  NMR spectra of compound **33** (101 MHz, Chloroform-*d*)**

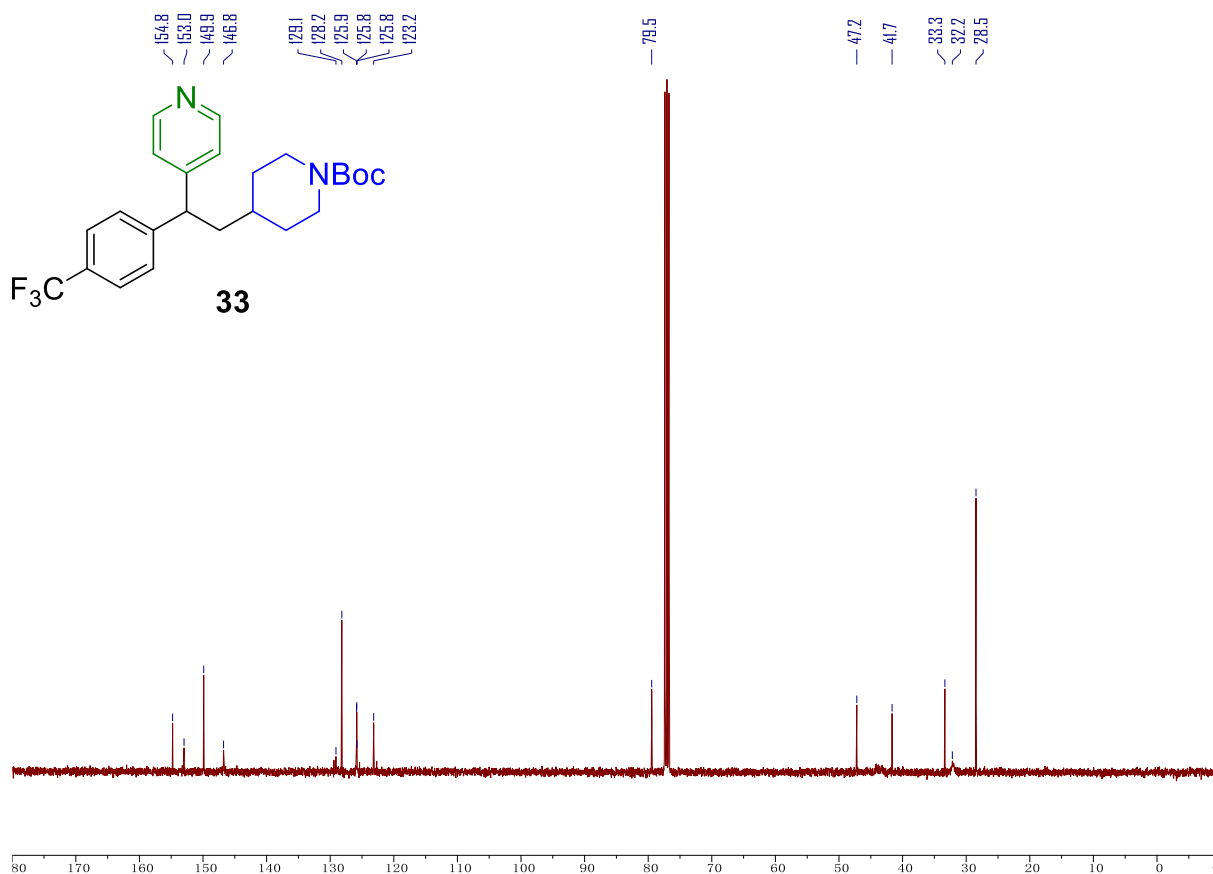

**$^{19}\text{F}$  NMR spectra of compound **33** (376 MHz, Chloroform-*d*)**

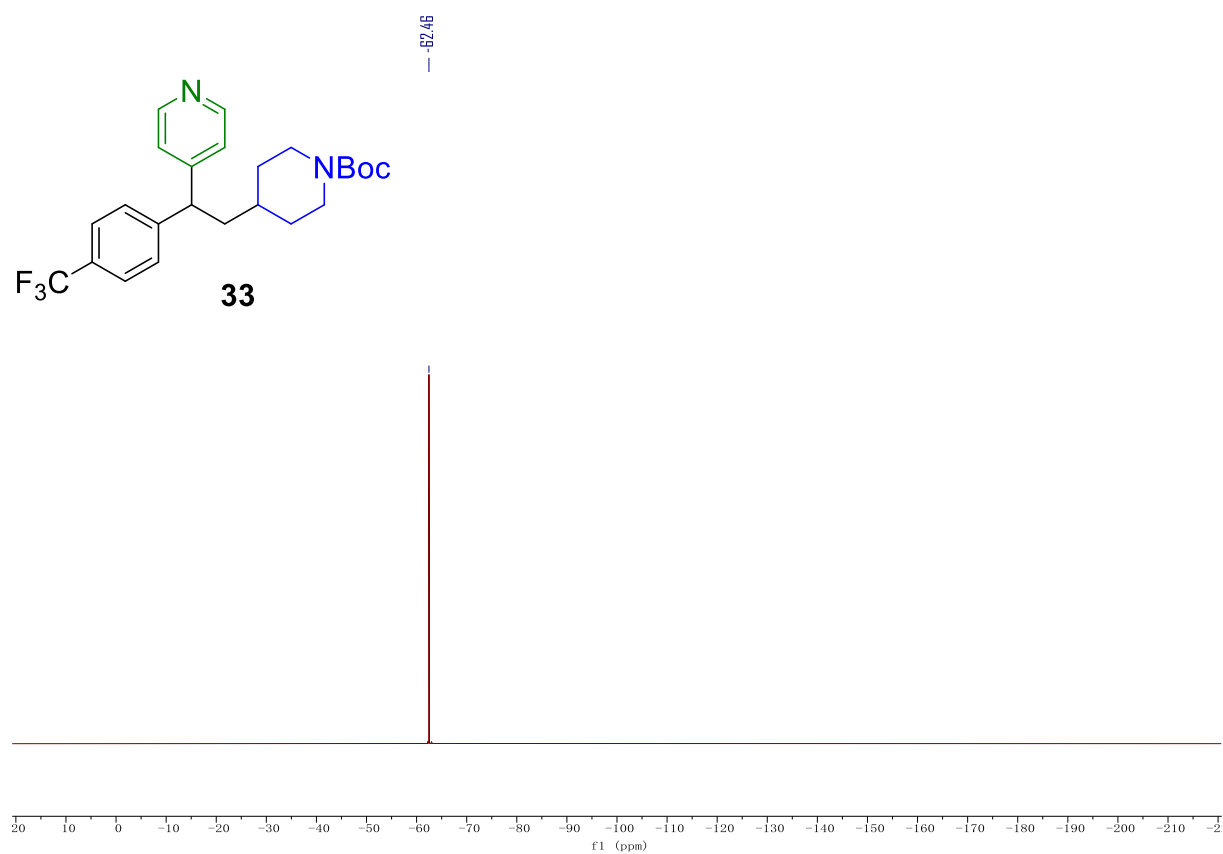

**<sup>1</sup>H NMR spectra of compound **34** (400 MHz, Chloroform-*d*)**

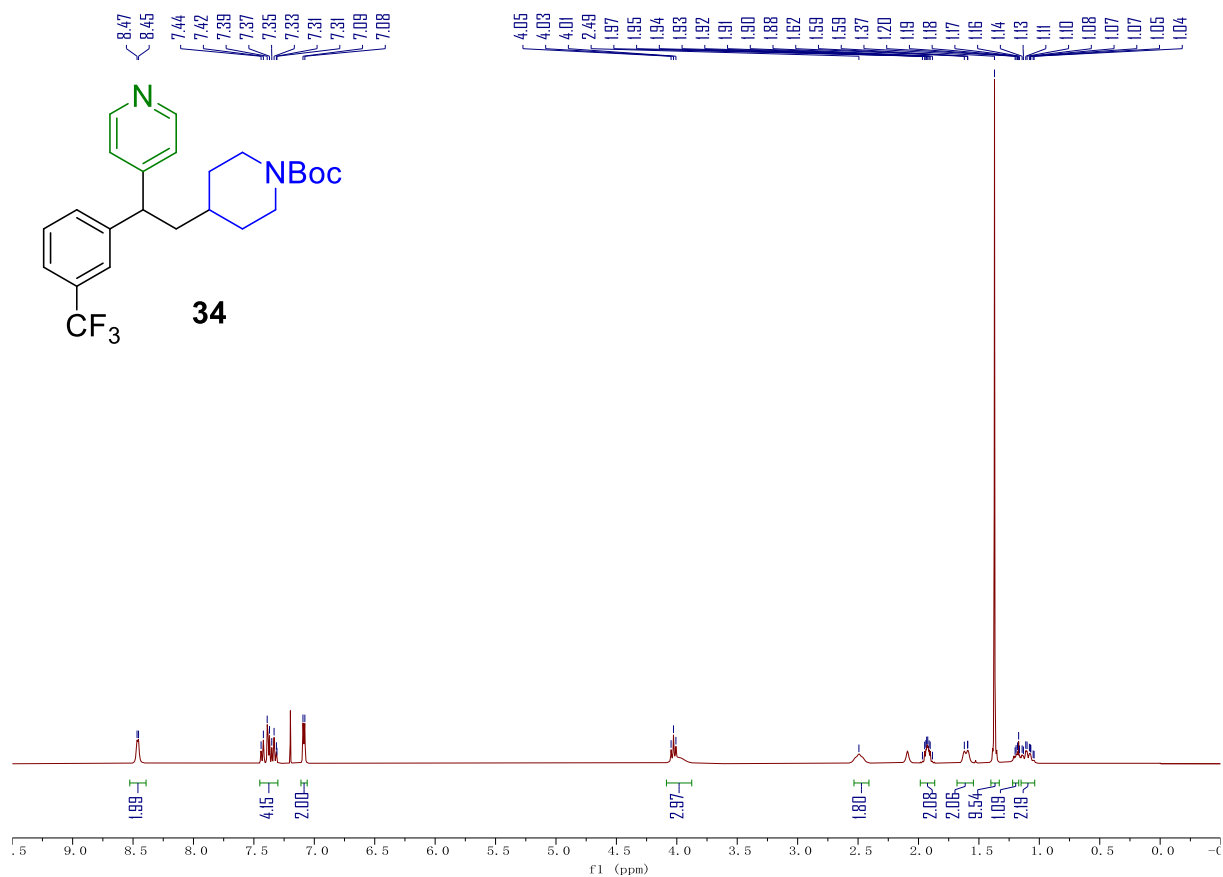

**<sup>13</sup>C NMR spectra of compound **34** (101 MHz, Chloroform-*d*)**

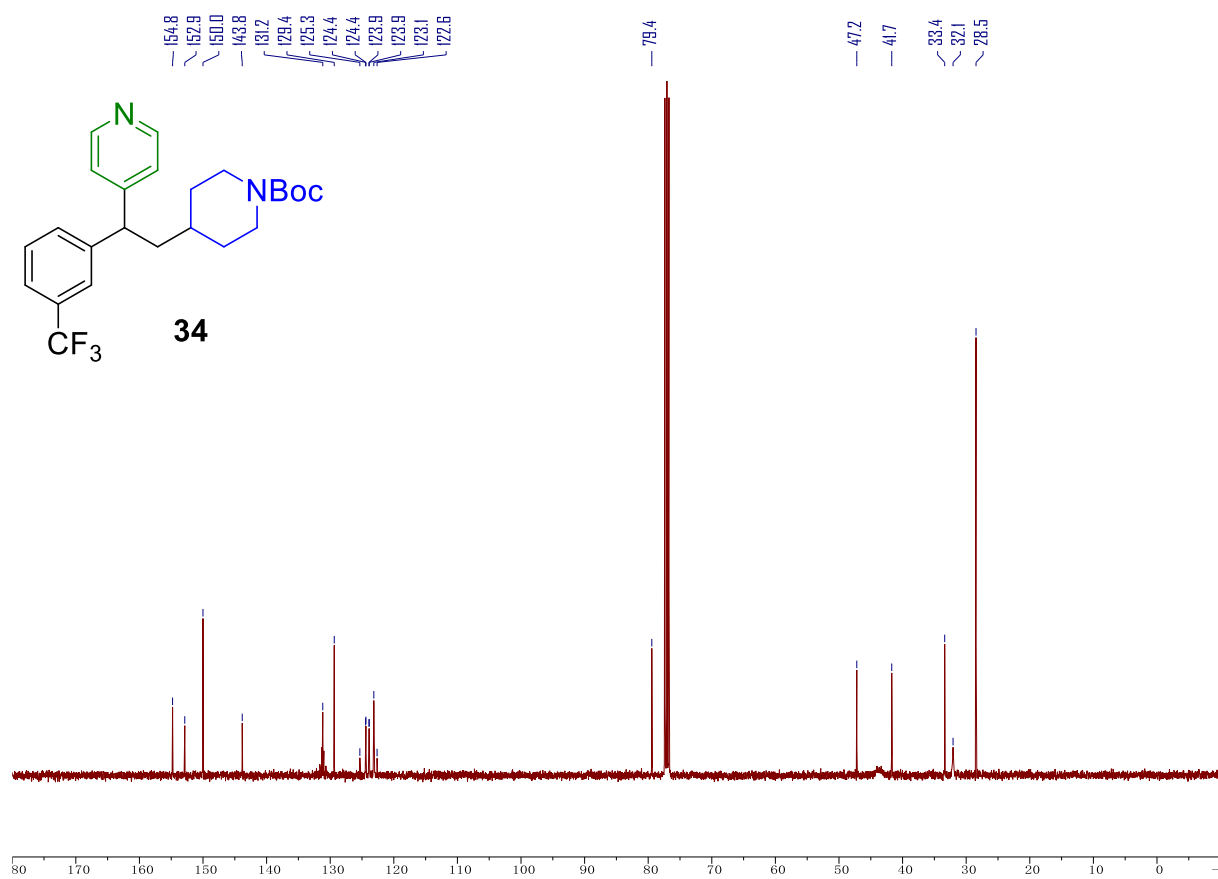

**$^{19}\text{F}$  NMR spectra of compound **34** (376 MHz, Chloroform-*d*)**

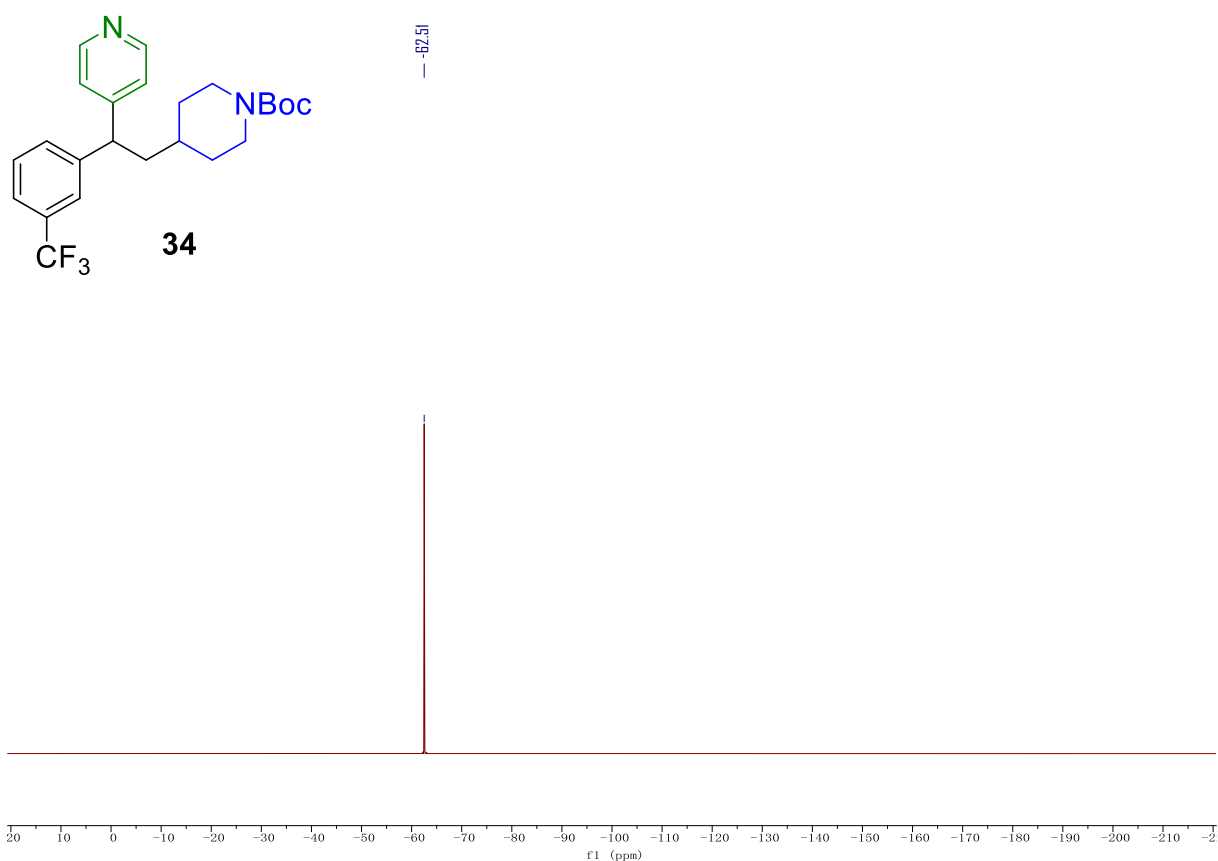

**$^1\text{H}$  NMR spectra of compound **35** (400 MHz, Chloroform-*d*)**

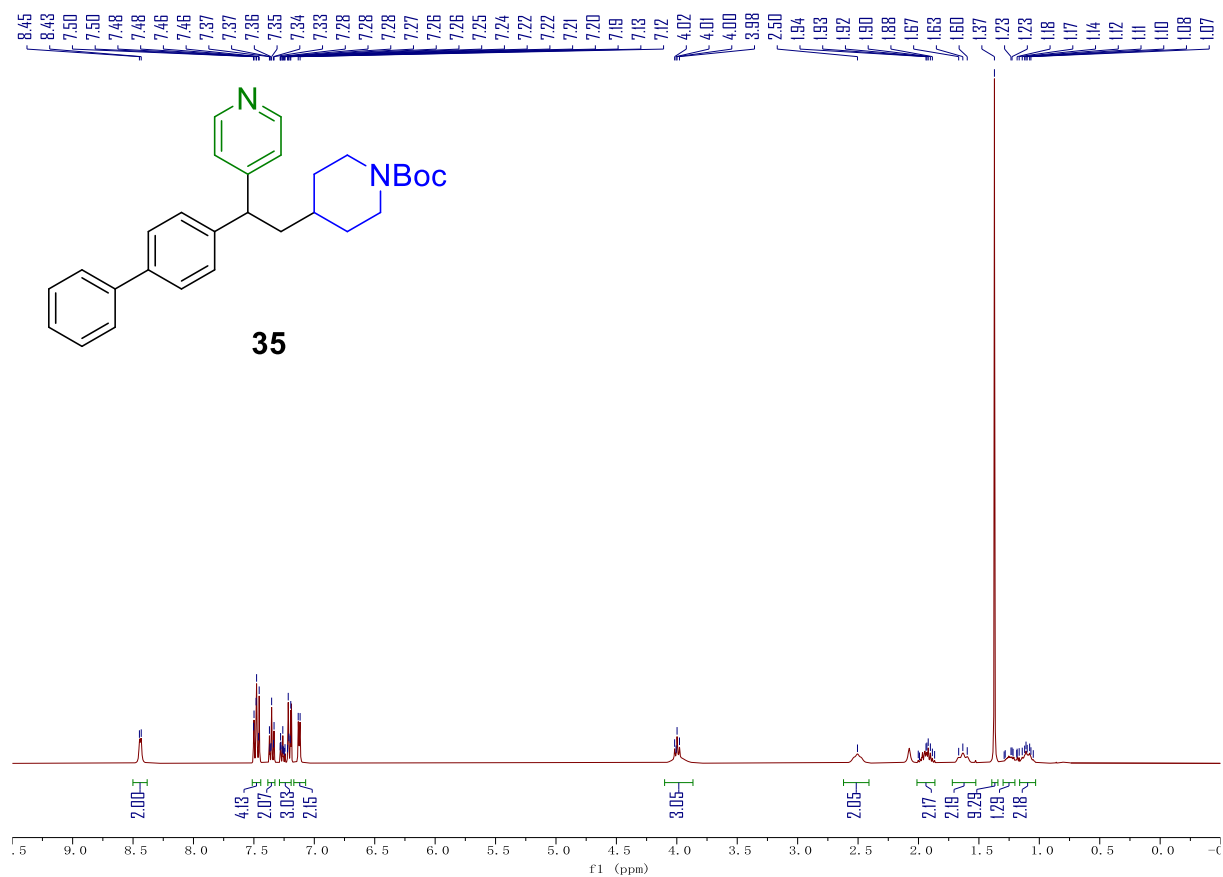

**$^{13}\text{C}$  NMR spectra of compound **35** (101 MHz, Chloroform-*d*)**

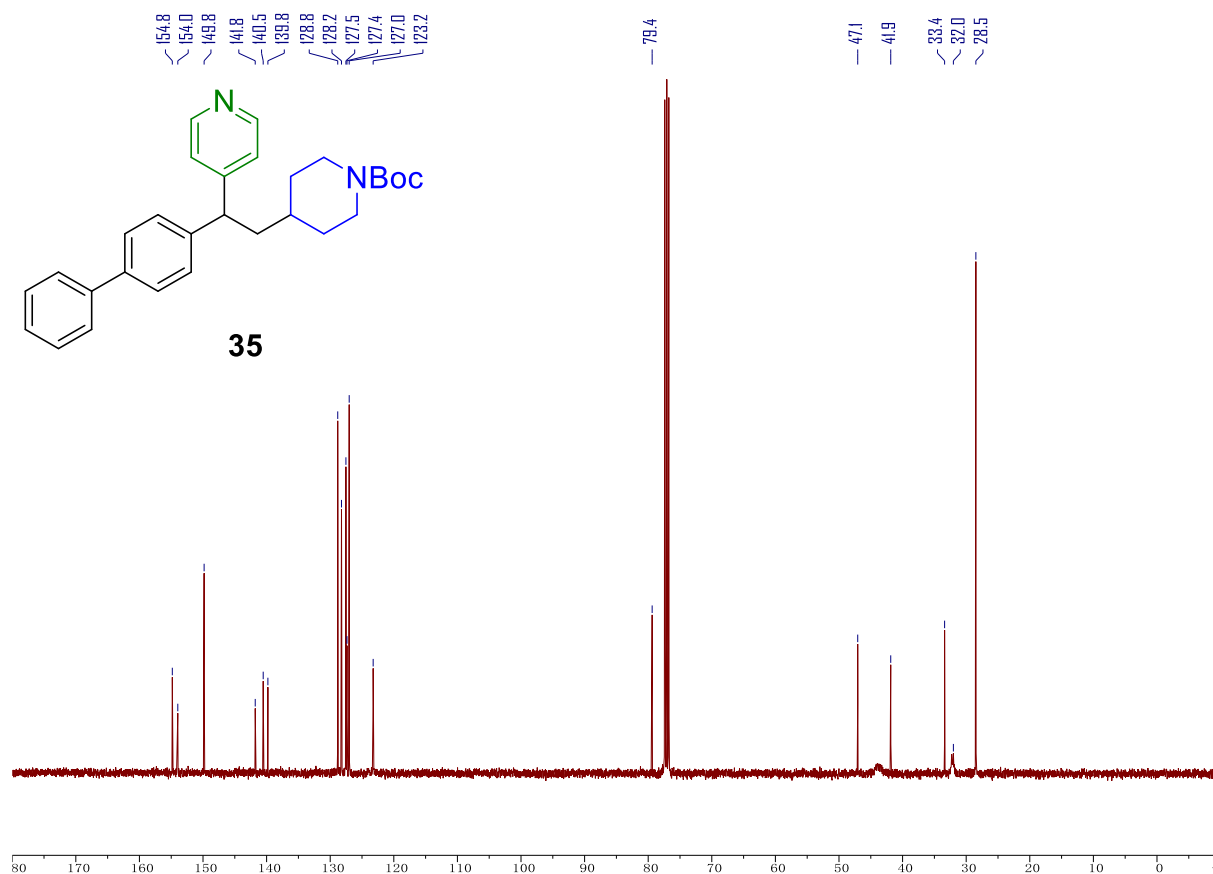

**$^1\text{H}$  NMR spectra of compound **36** (400 MHz, Chloroform-*d*)**

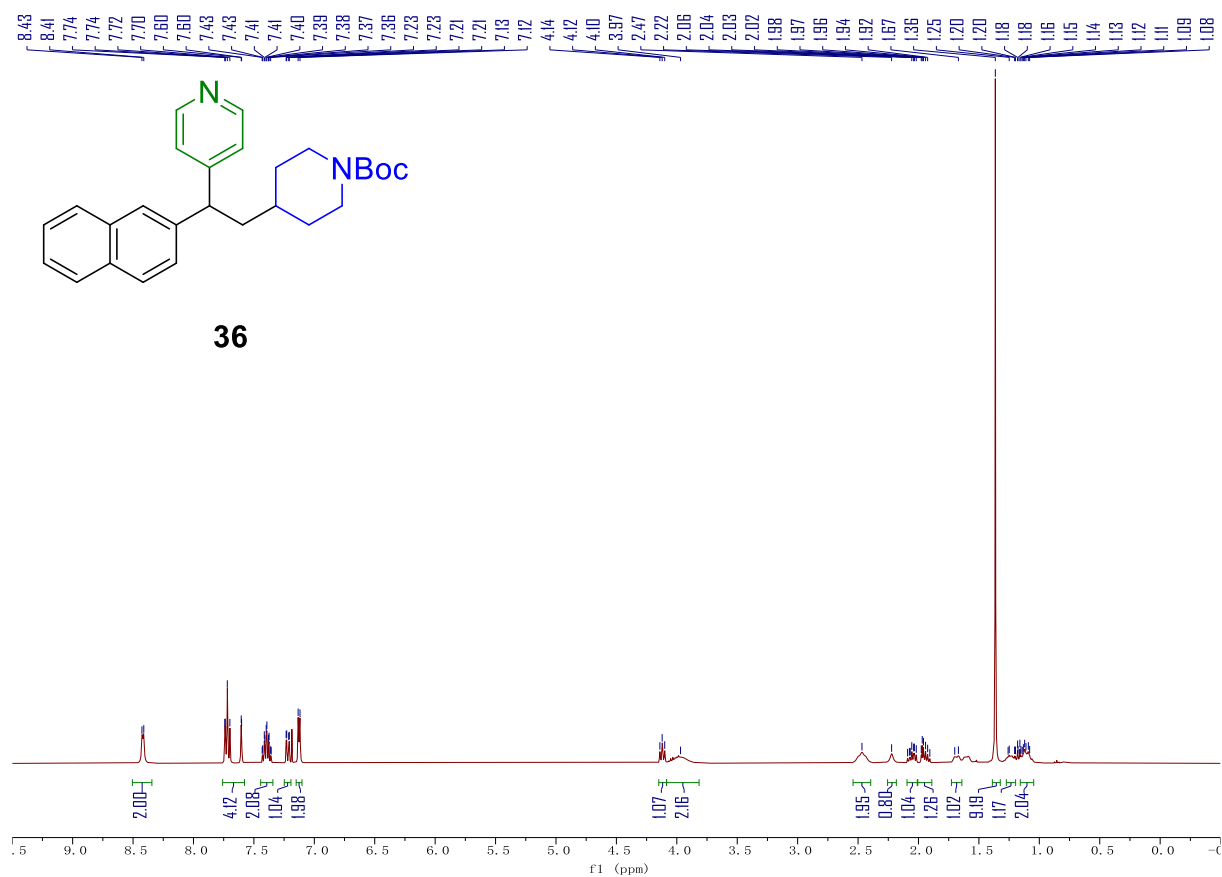



**$^{13}\text{C}$  NMR spectra of compound **36** (101 MHz, Chloroform-*d*)**

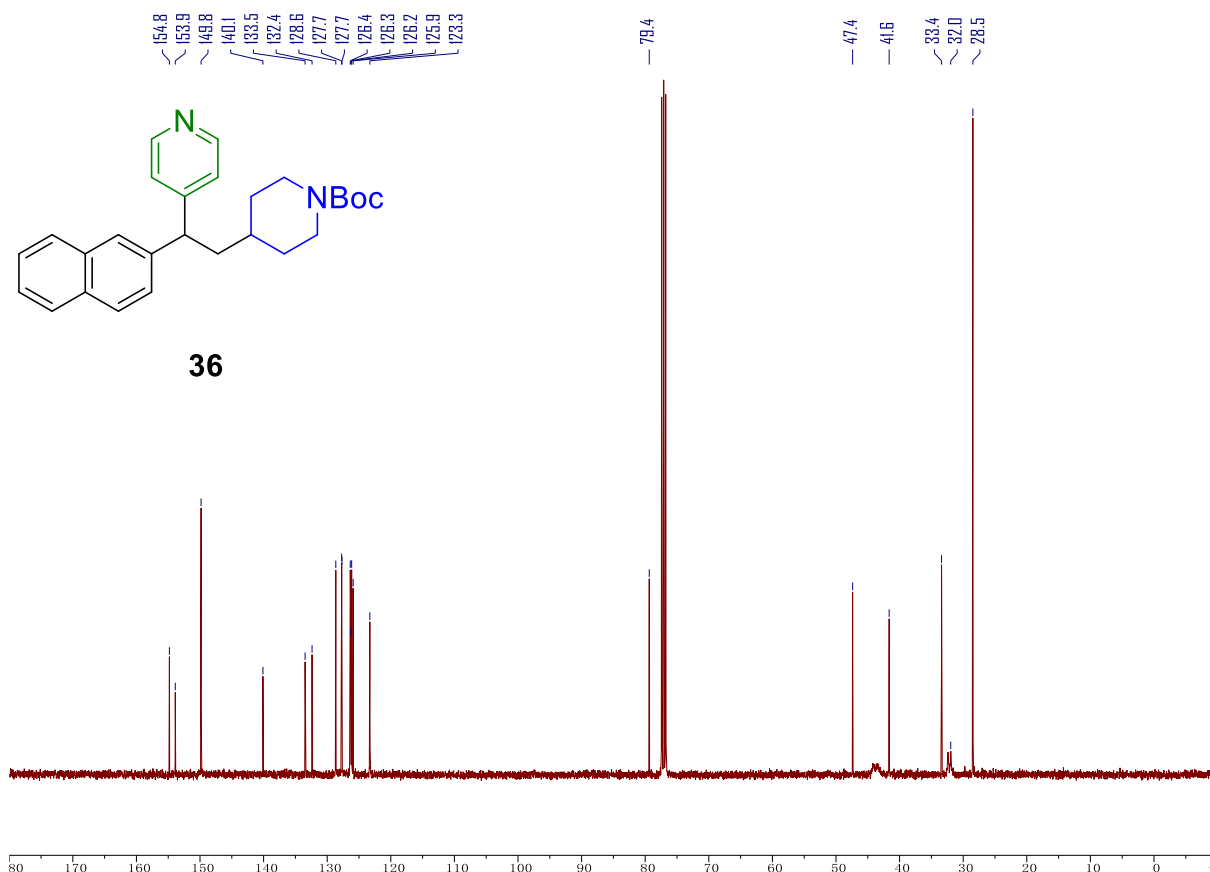

**$^1\text{H}$  NMR spectra of compound **37** (400 MHz, Chloroform-*d*)**

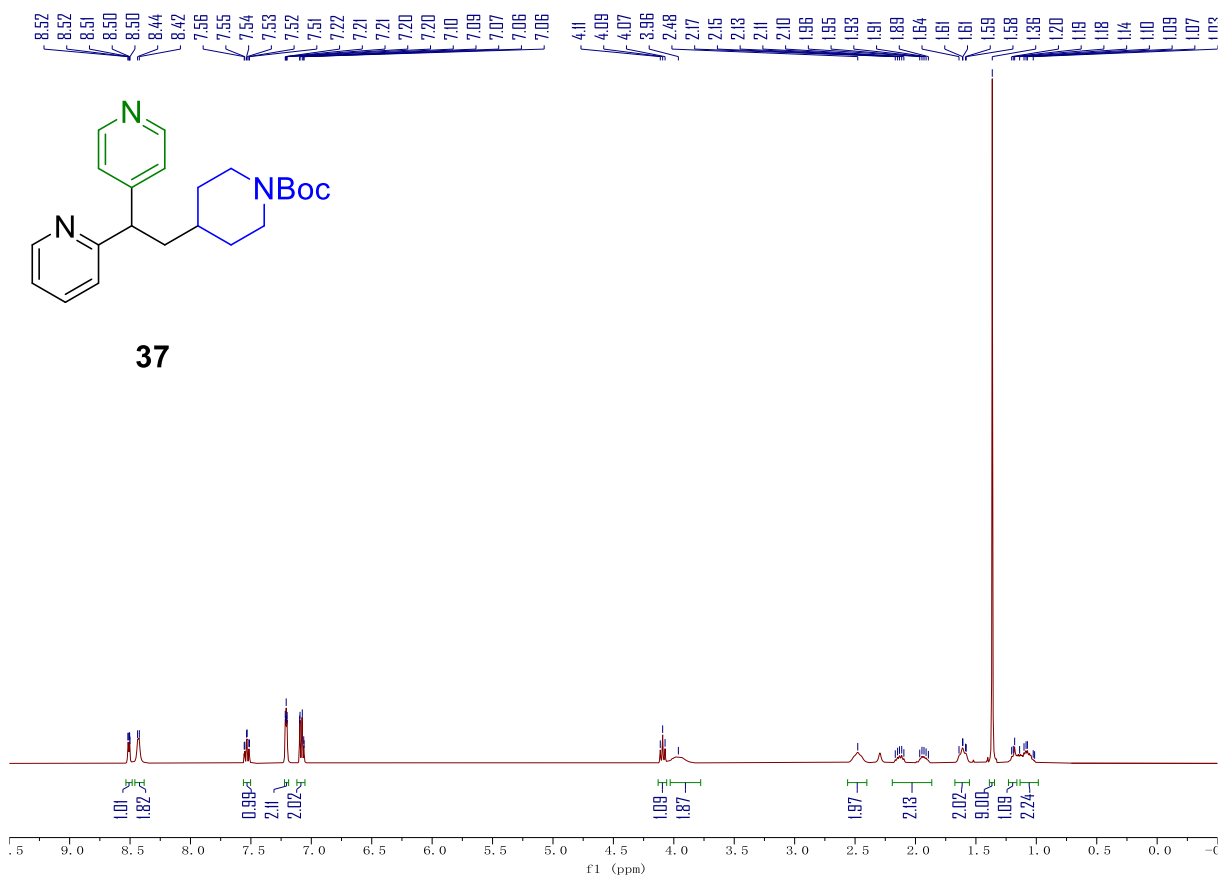

**$^{13}\text{C}$  NMR spectra of compound **37** (101 MHz, Chloroform-*d*)**

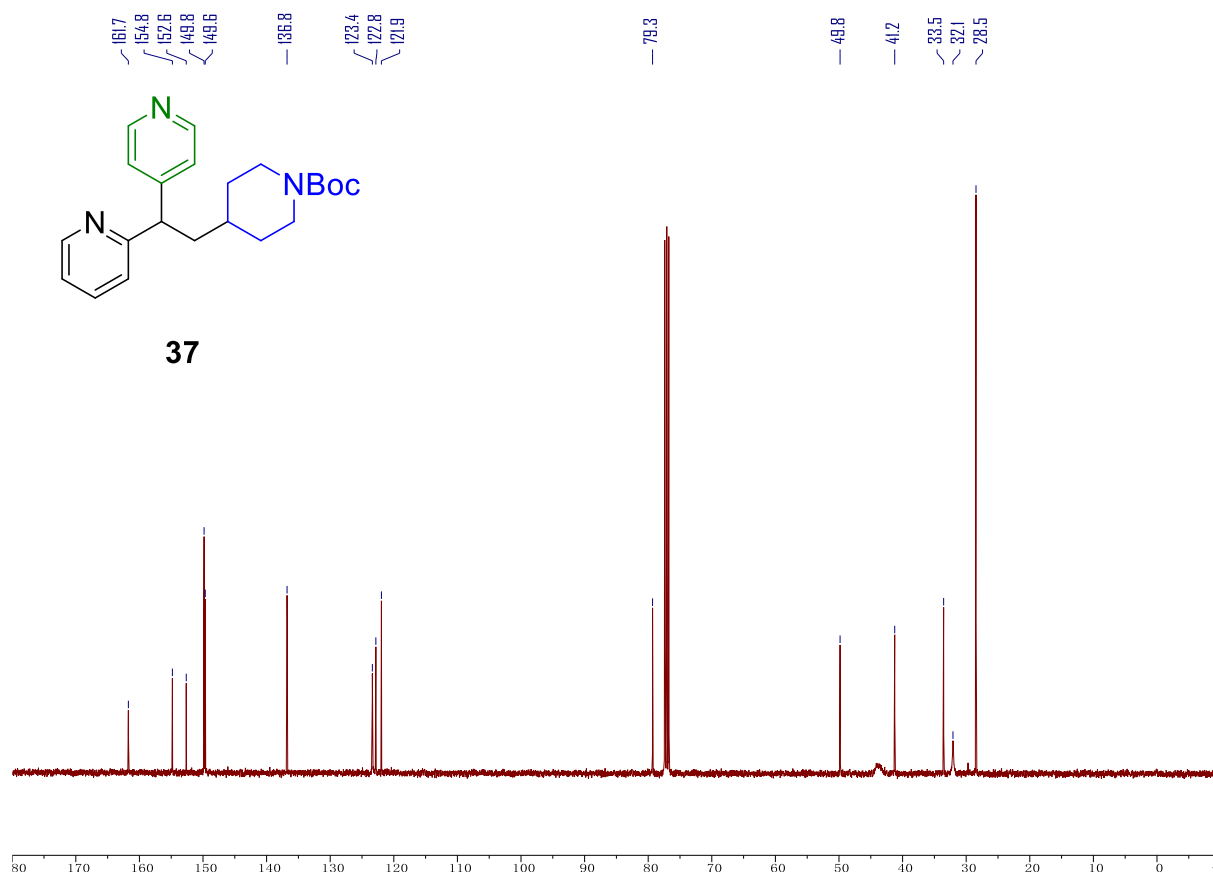

**$^1\text{H}$  NMR spectra of compound **38** (400 MHz, Chloroform-*d*)**

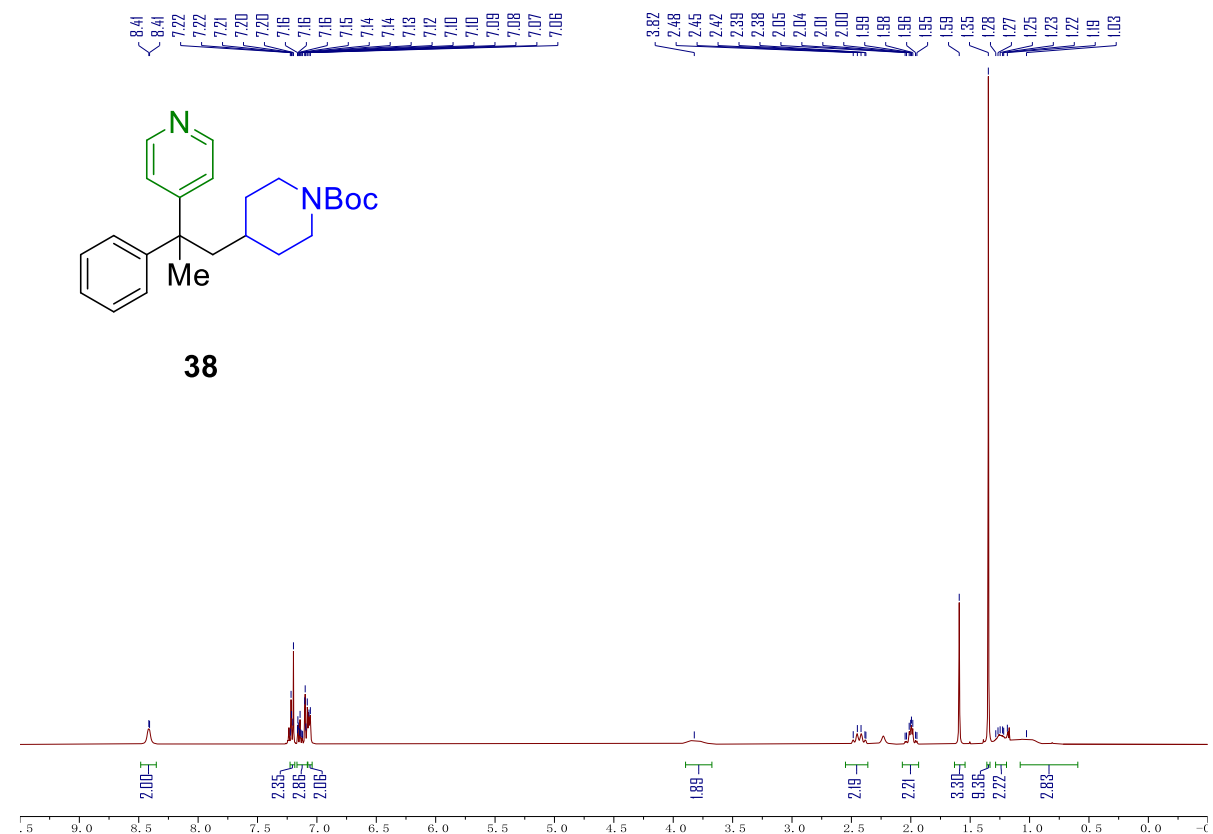

**$^{13}\text{C}$  NMR spectra of compound **38** (101 MHz, Chloroform-*d*)**

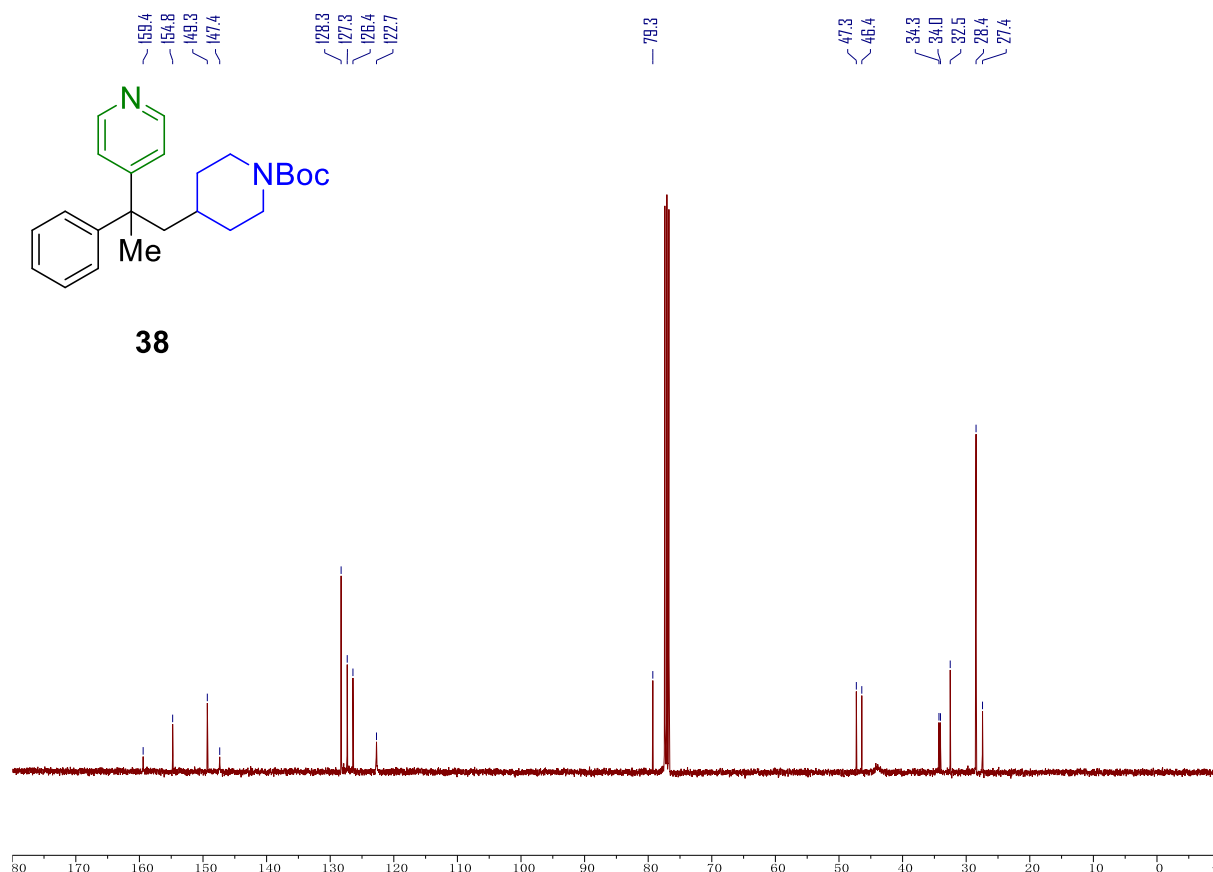

**$^1\text{H}$  NMR spectra of compound **39** (400 MHz, Chloroform-*d*)**

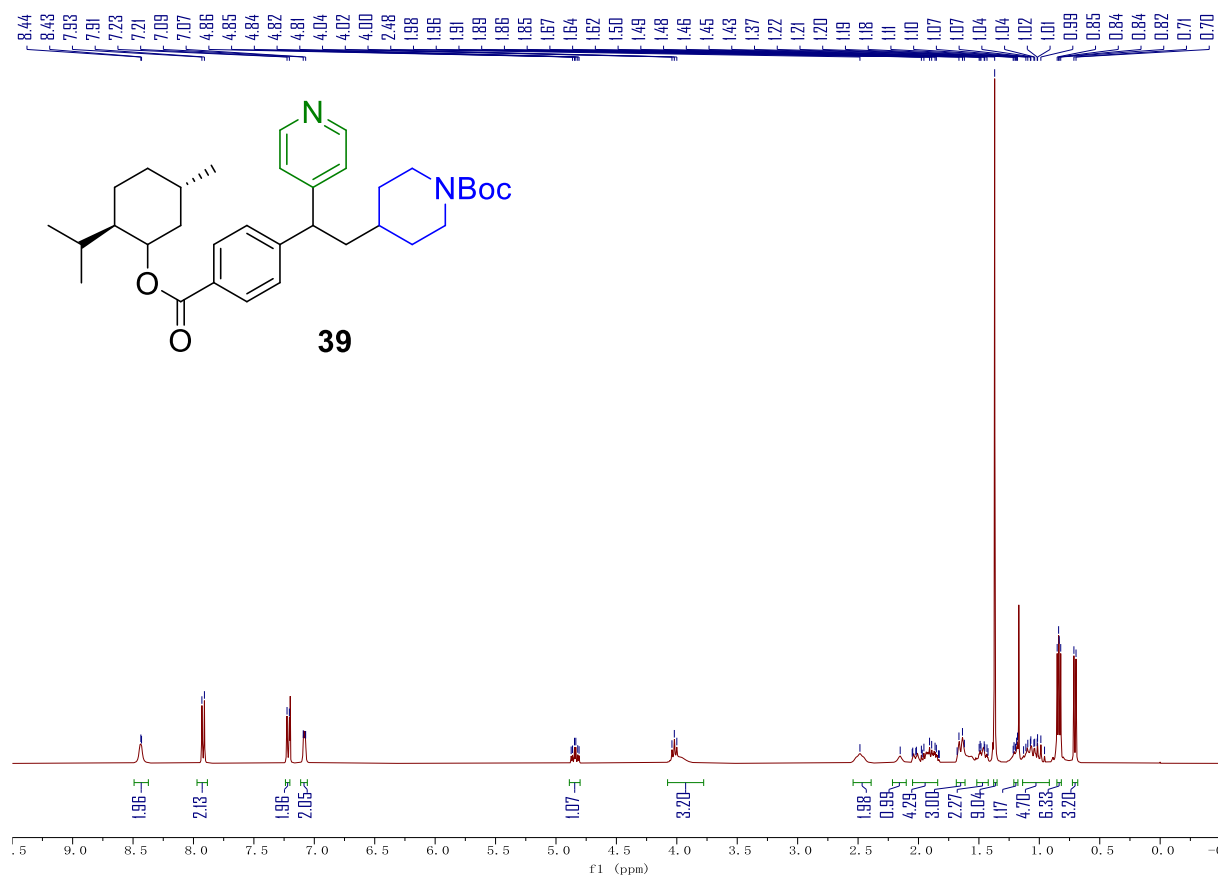

**$^{13}\text{C}$  NMR spectra of compound **39** (101 MHz, Chloroform-*d*)**

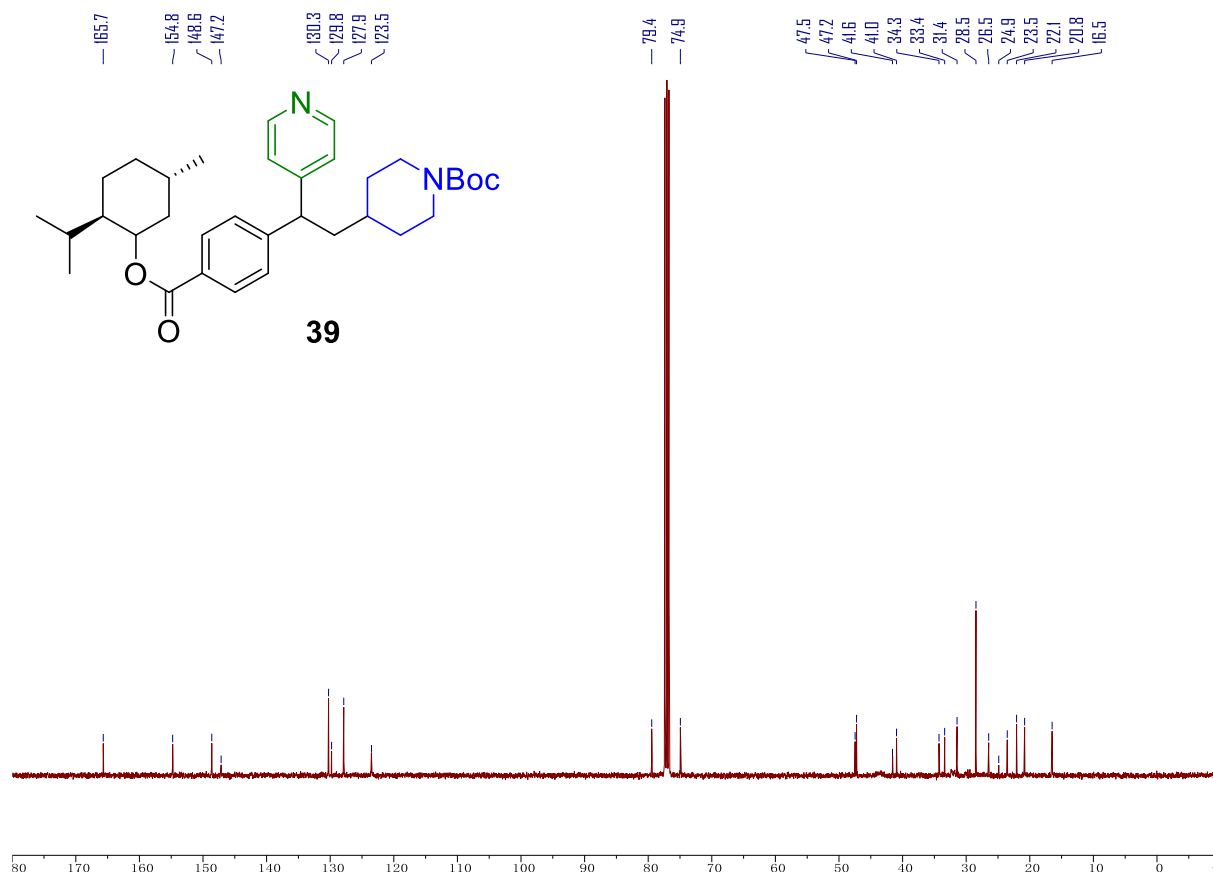

**$^1\text{H}$  NMR spectra of compound **40** (400 MHz, Chloroform-*d*)**

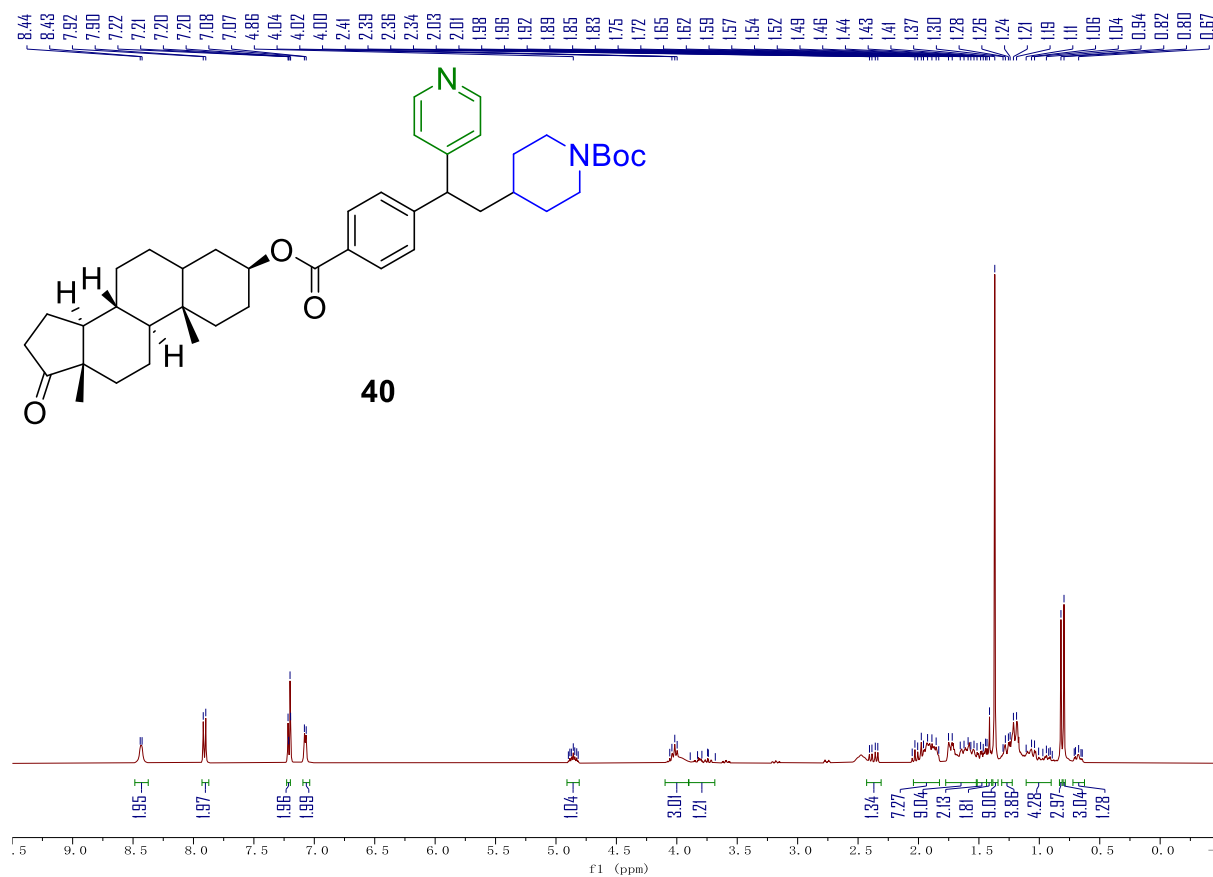

**$^{13}\text{C}$  NMR spectra of compound **40** (101 MHz, Chloroform-*d*)**

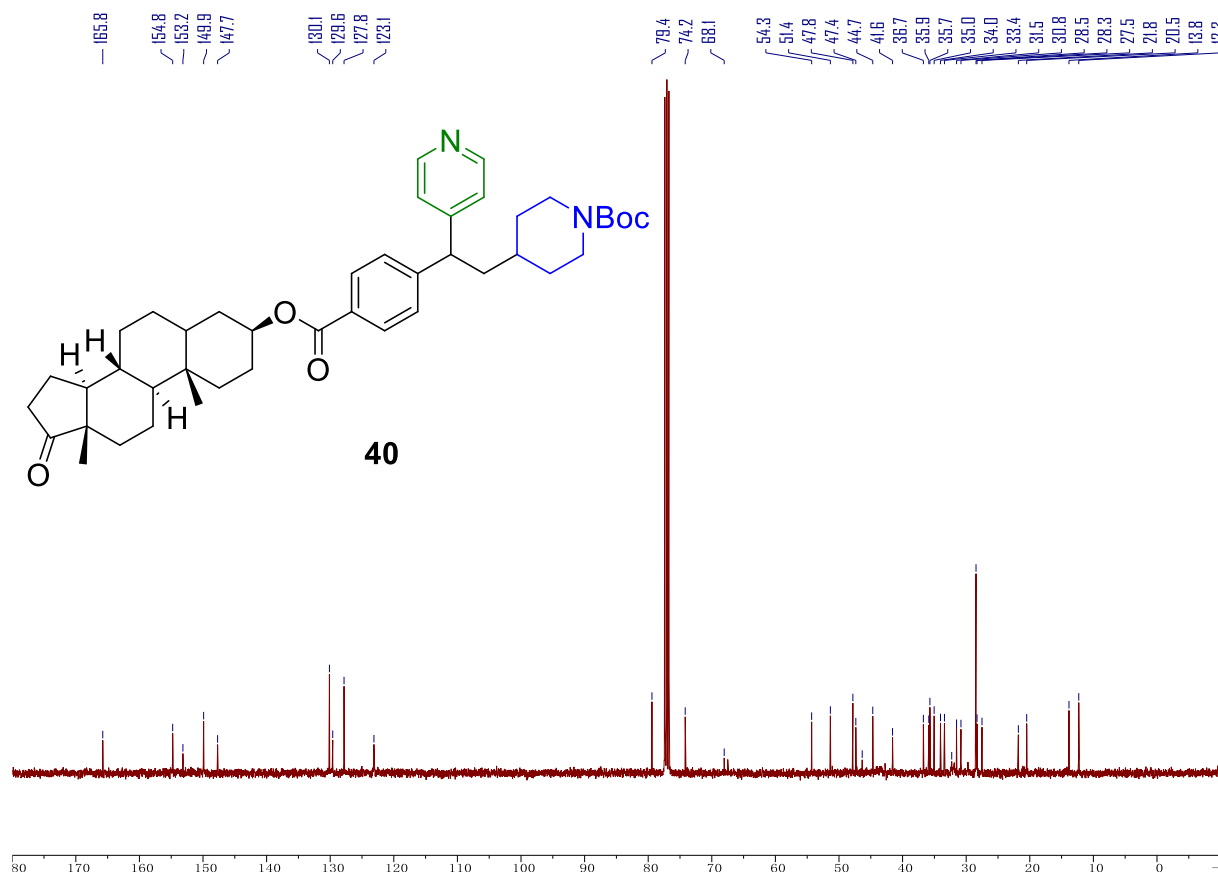

**$^1\text{H}$  NMR spectra of compound **41** (400 MHz, Chloroform-*d*)**

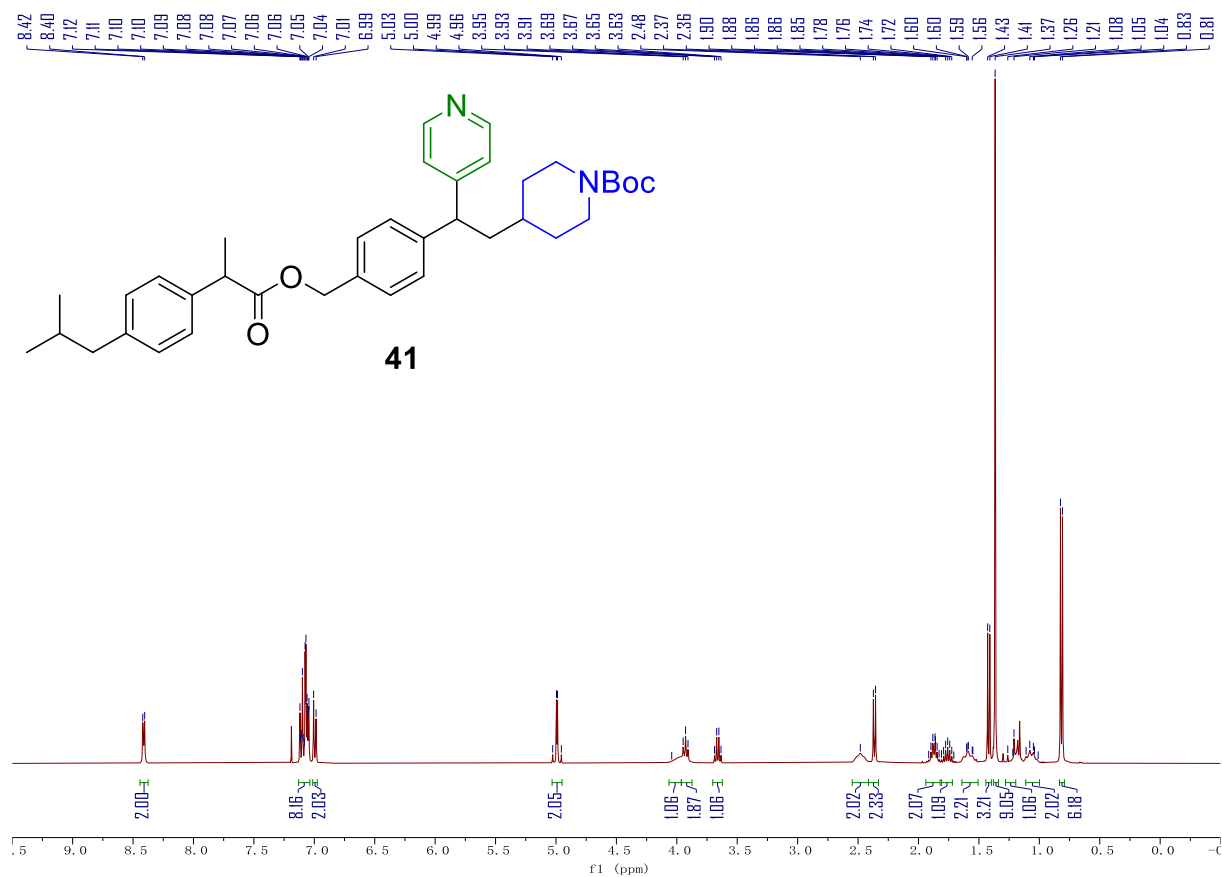

**$^{13}\text{C}$  NMR spectra of compound **41** (101 MHz, Chloroform-*d*)**

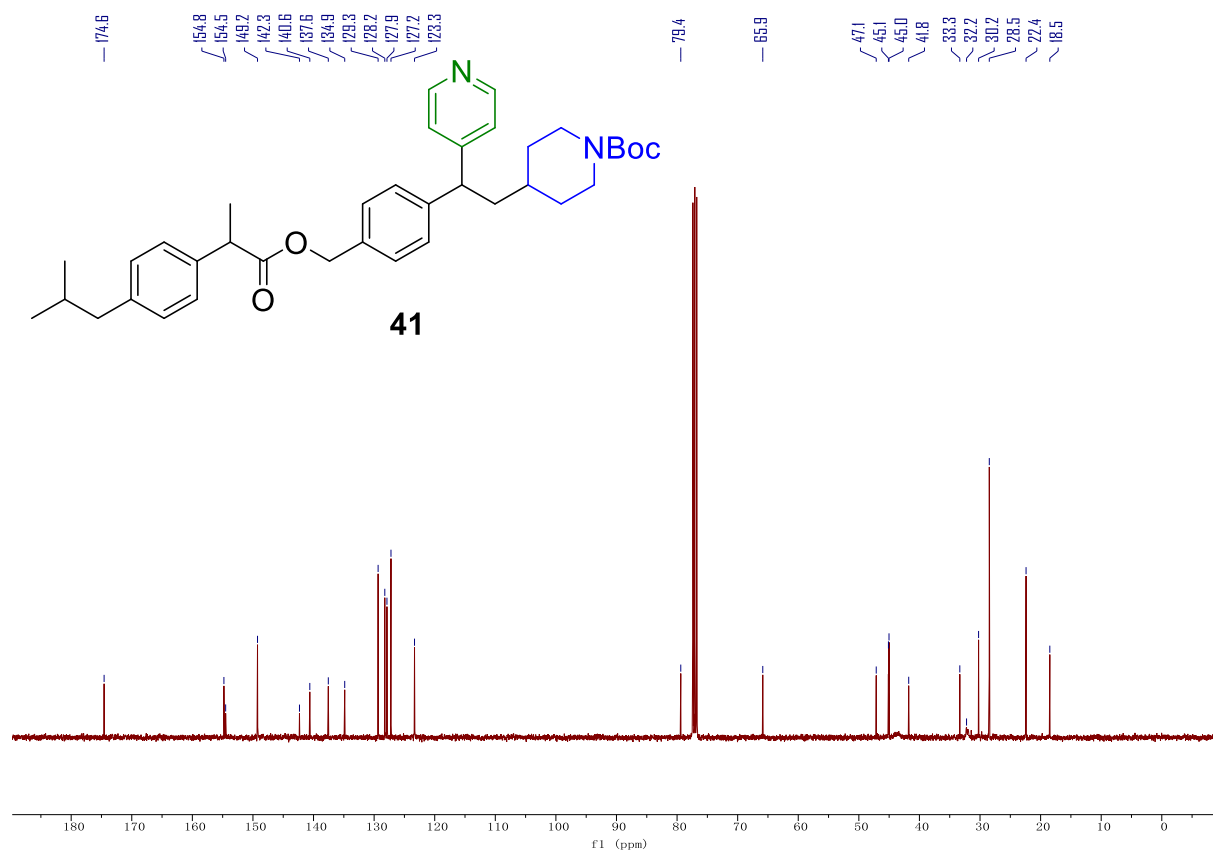

**$^1\text{H}$  NMR spectra of compound **42** (400 MHz, Chloroform-*d*)**

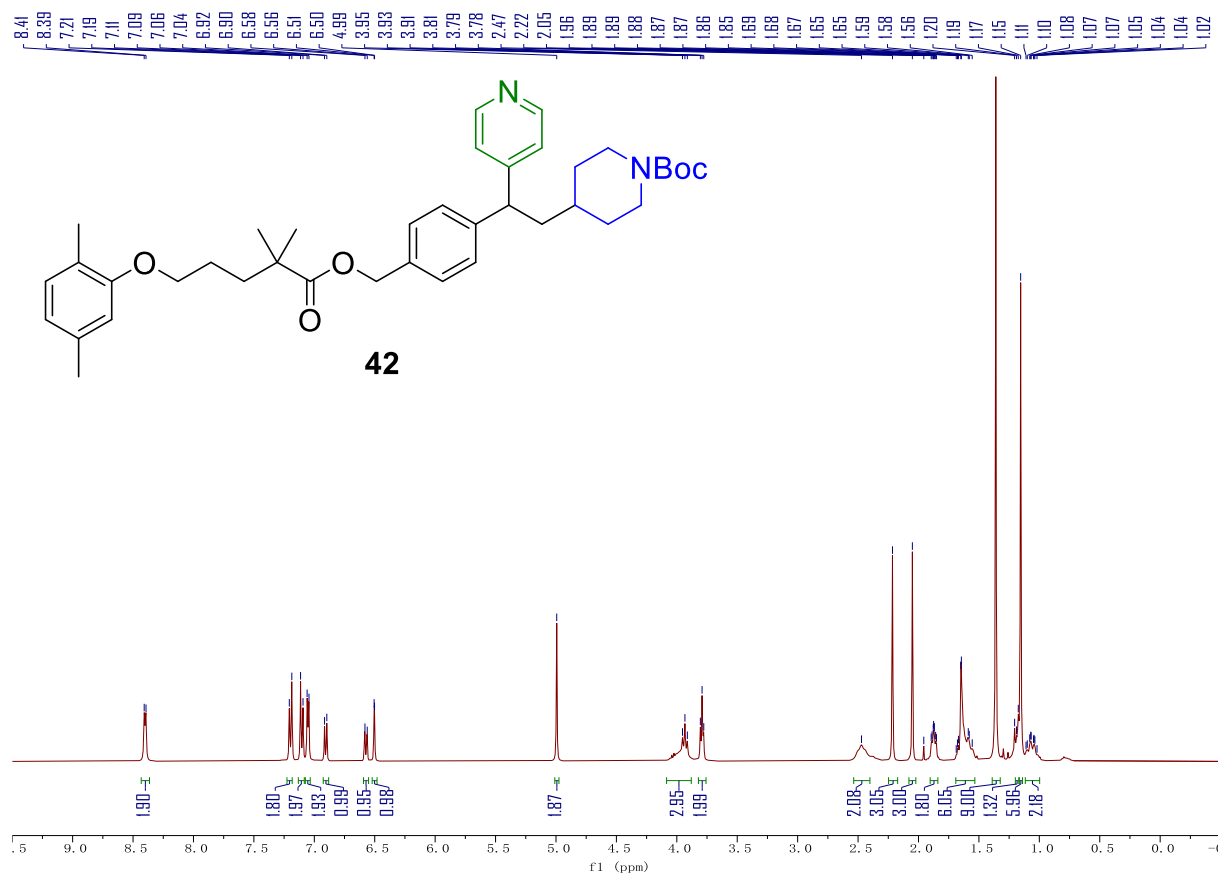

**<sup>13</sup>C NMR spectra of compound 42 (101 MHz, Chloroform-*d*)**

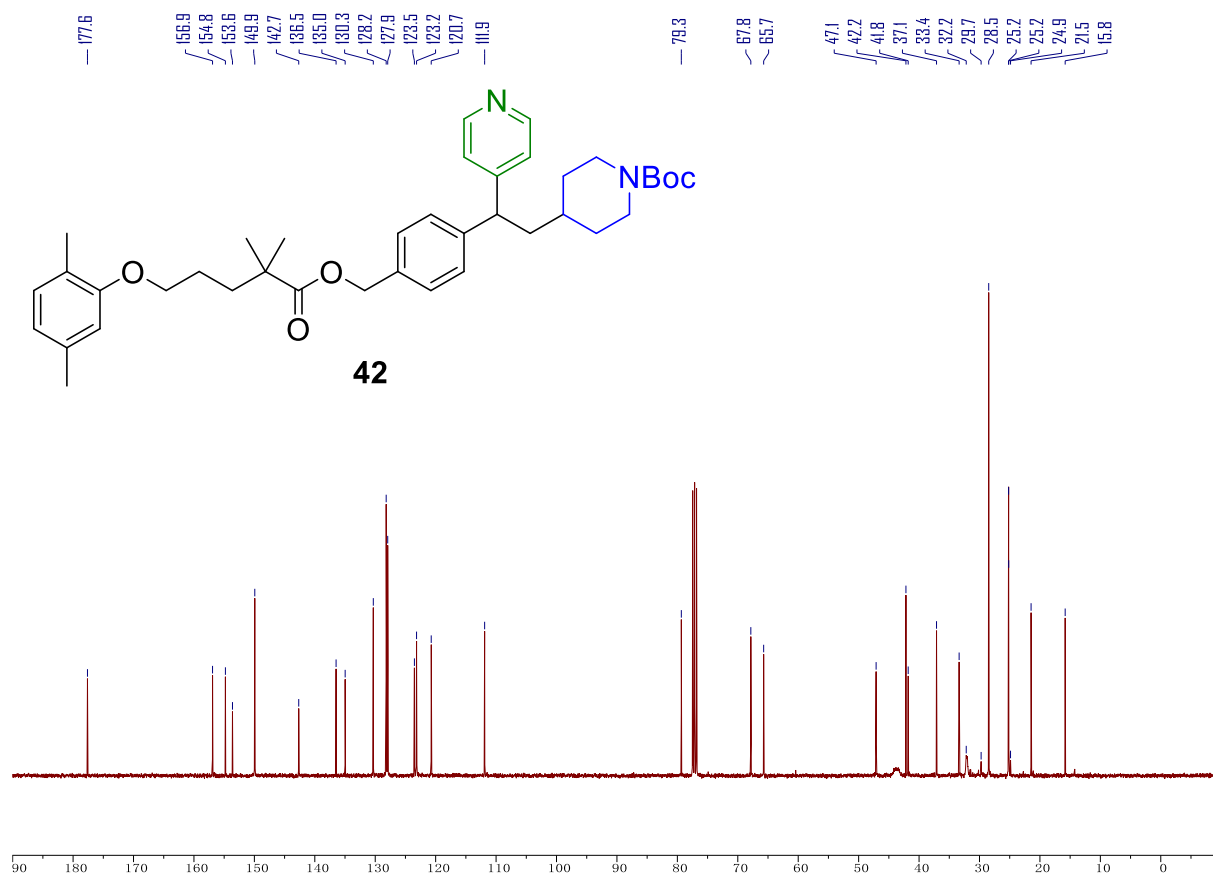

**<sup>1</sup>H NMR spectra of compound 43 (400 MHz, Chloroform-*d*)**

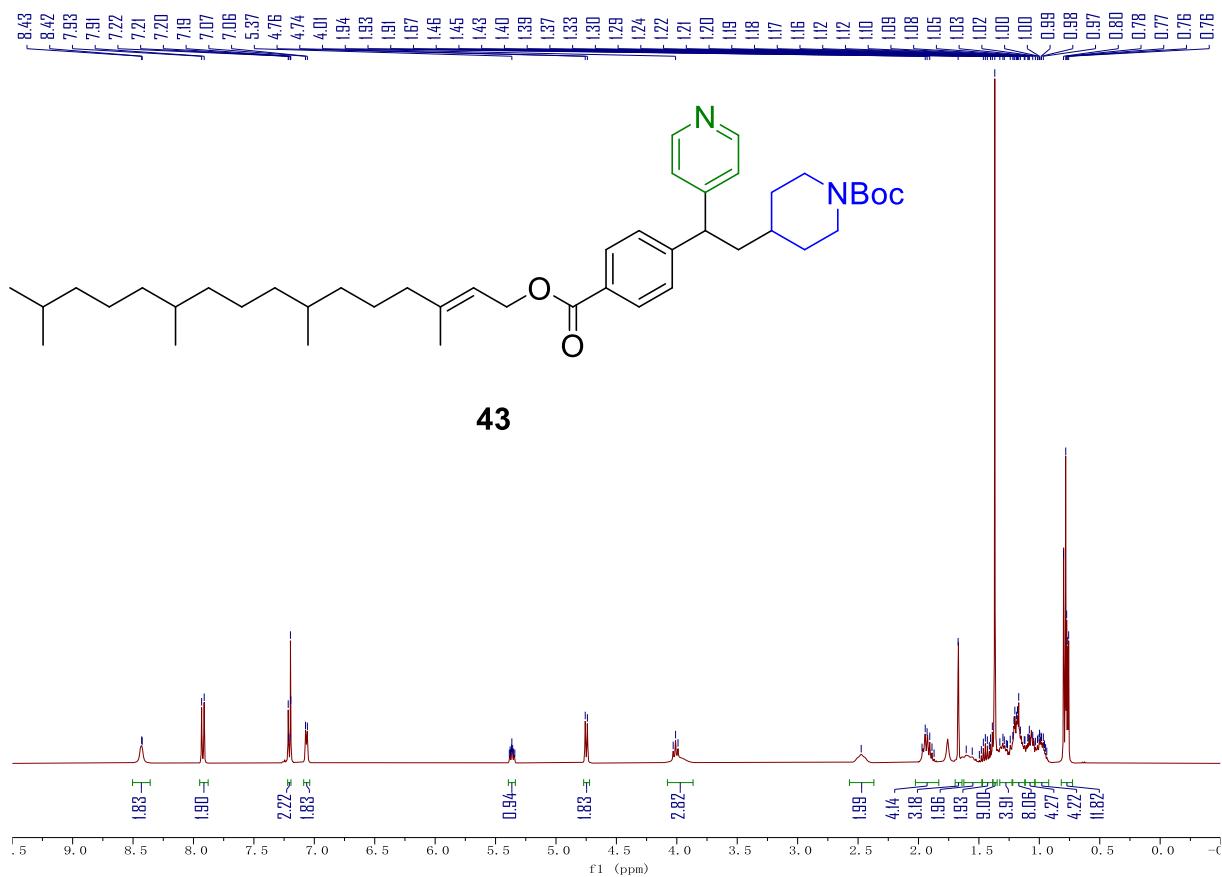

**$^{13}\text{C}$  NMR spectra of compound **43** (101 MHz, Chloroform-*d*)**

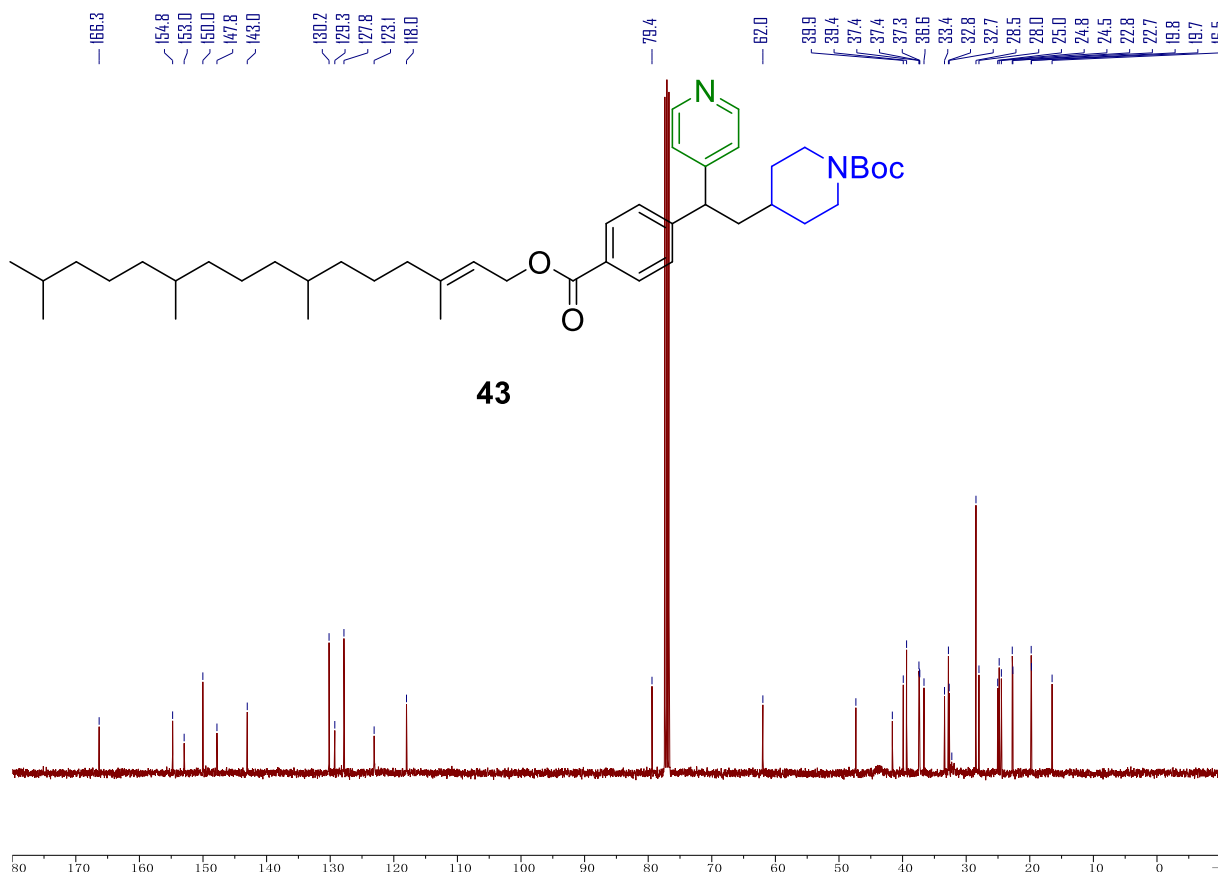

**$^1\text{H}$  NMR spectra of compound **44** (400 MHz, Chloroform-*d*)**

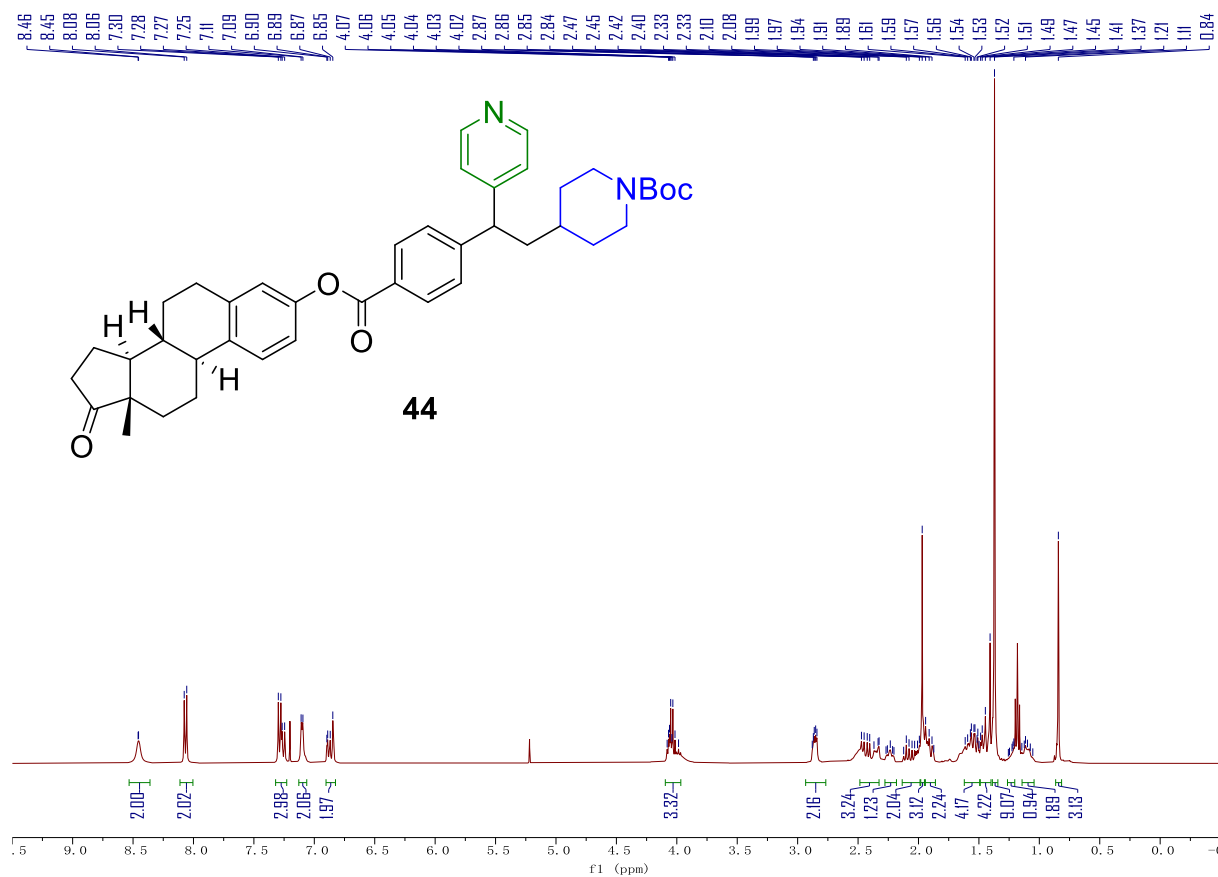



**$^{13}\text{C}$  NMR spectra of compound **44** (101 MHz, Chloroform-*d*)**

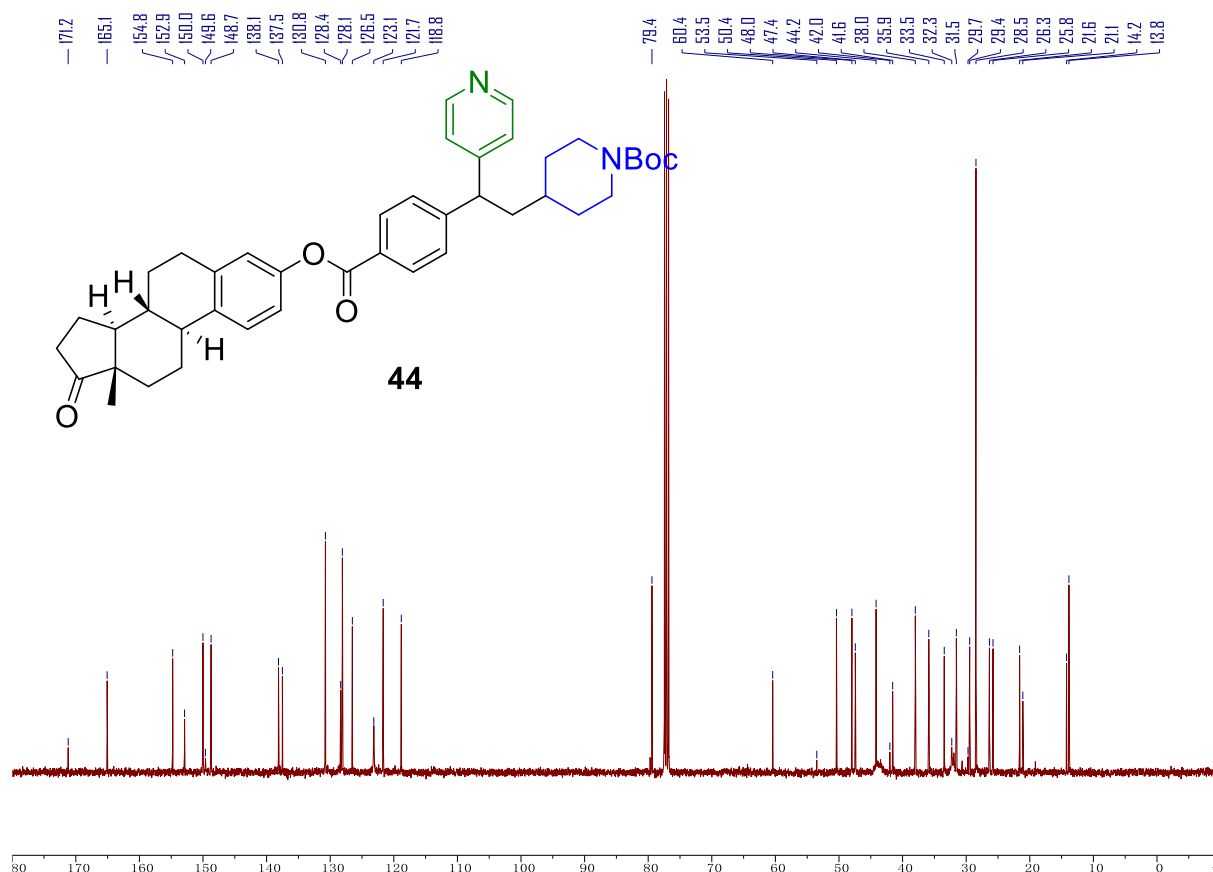

**$^1\text{H}$  NMR spectra of compound **45** (400 MHz, Chloroform-*d*)**

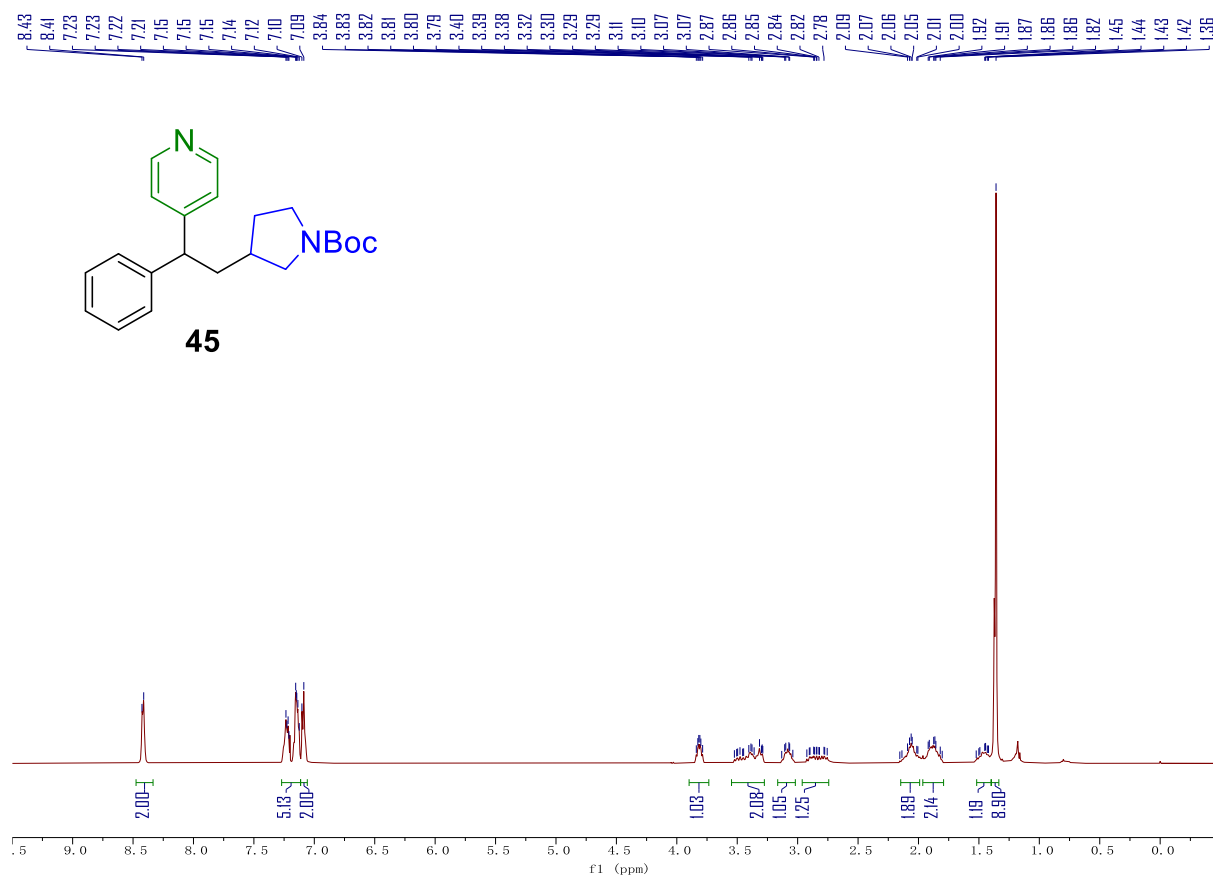

**$^{13}\text{C}$  NMR spectra of compound **45** (101 MHz, Chloroform-*d*)**

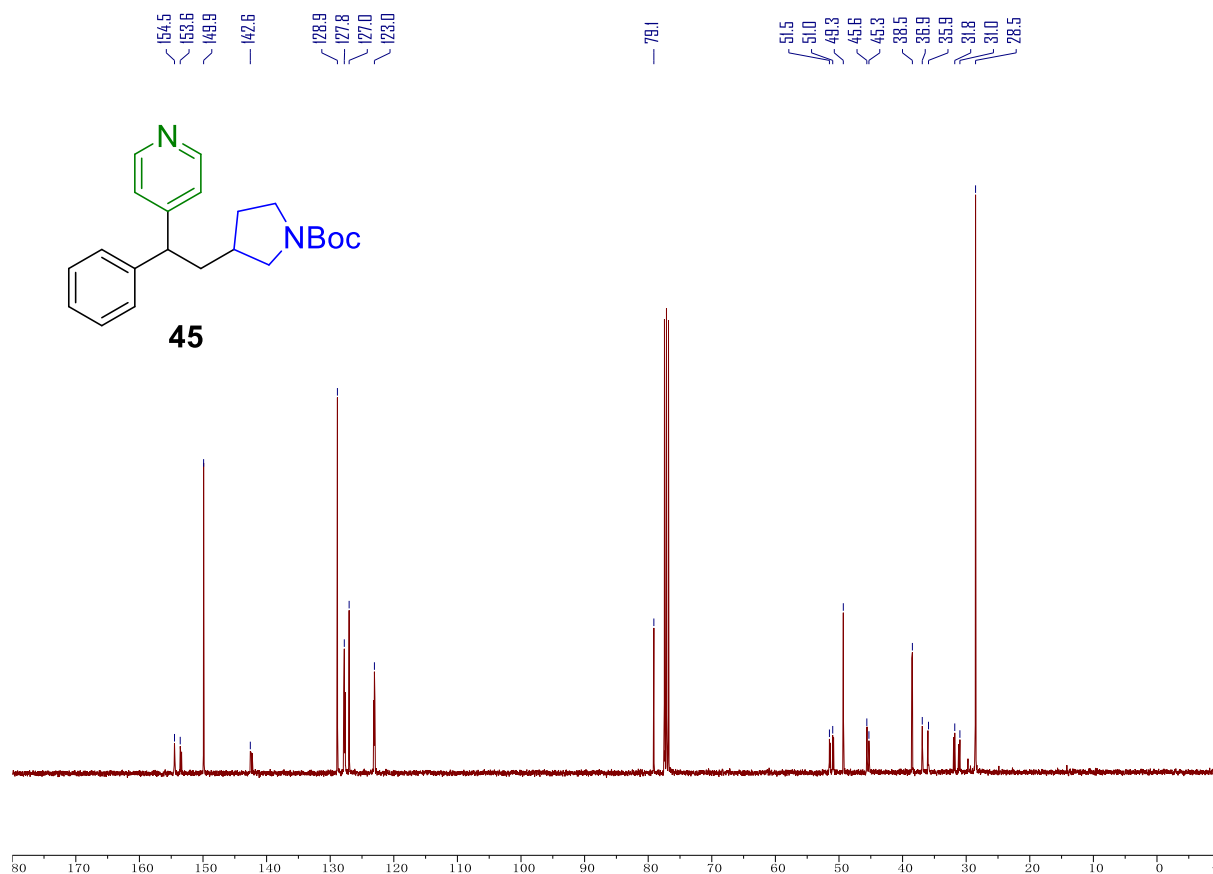

**$^1\text{H}$  NMR spectra of compound **46** (400 MHz, Chloroform-*d*)**

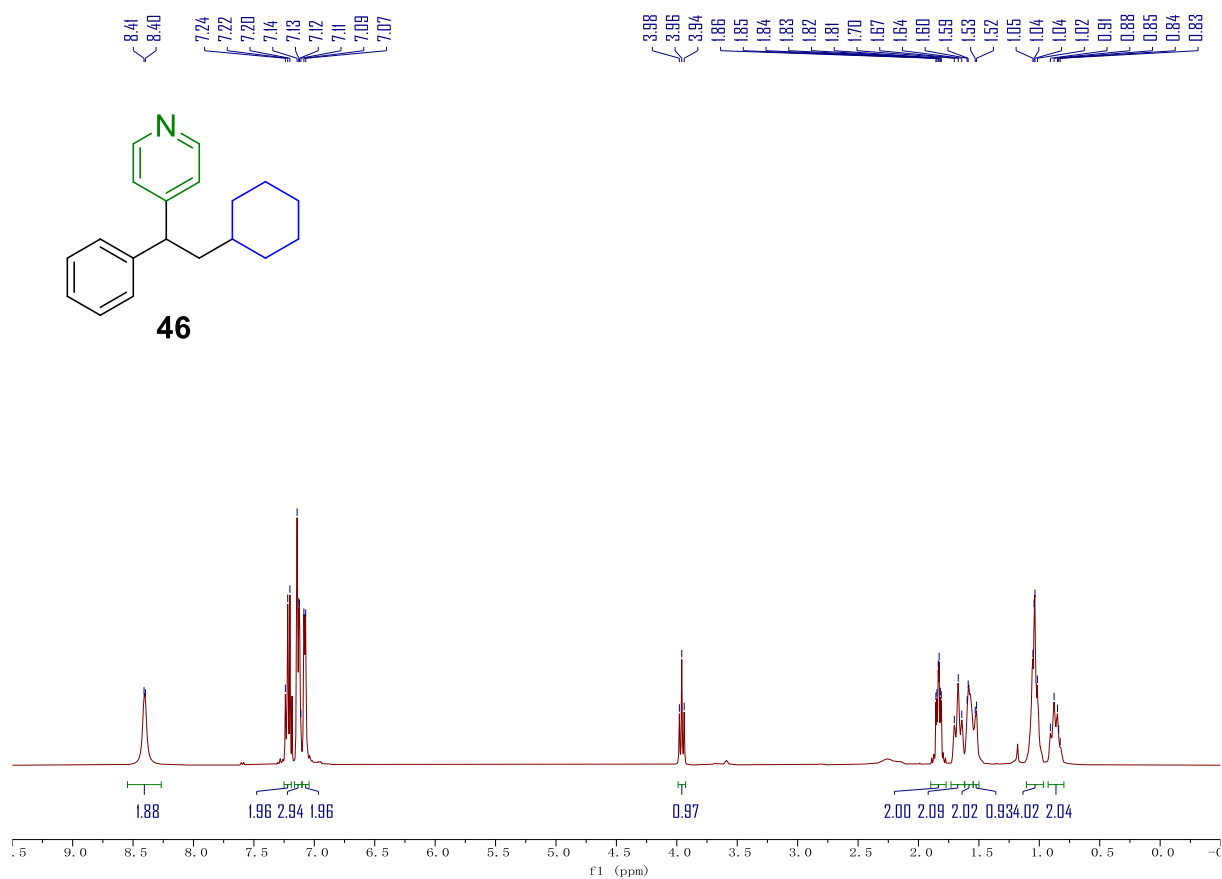

**$^{13}\text{C}$  NMR spectra of compound **46** (101 MHz, Chloroform-*d*)**

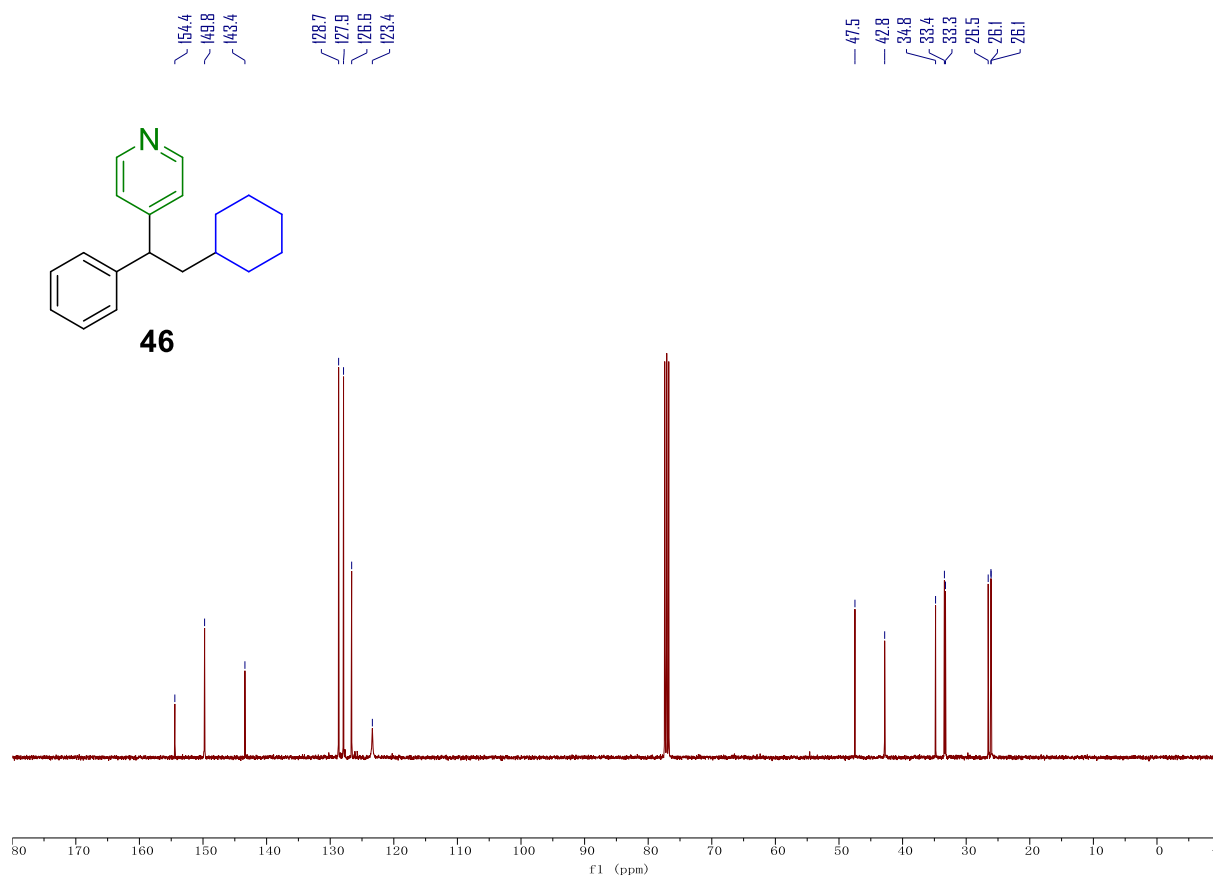

**$^1\text{H}$  NMR spectra of compound **47** (400 MHz, Chloroform-*d*)**

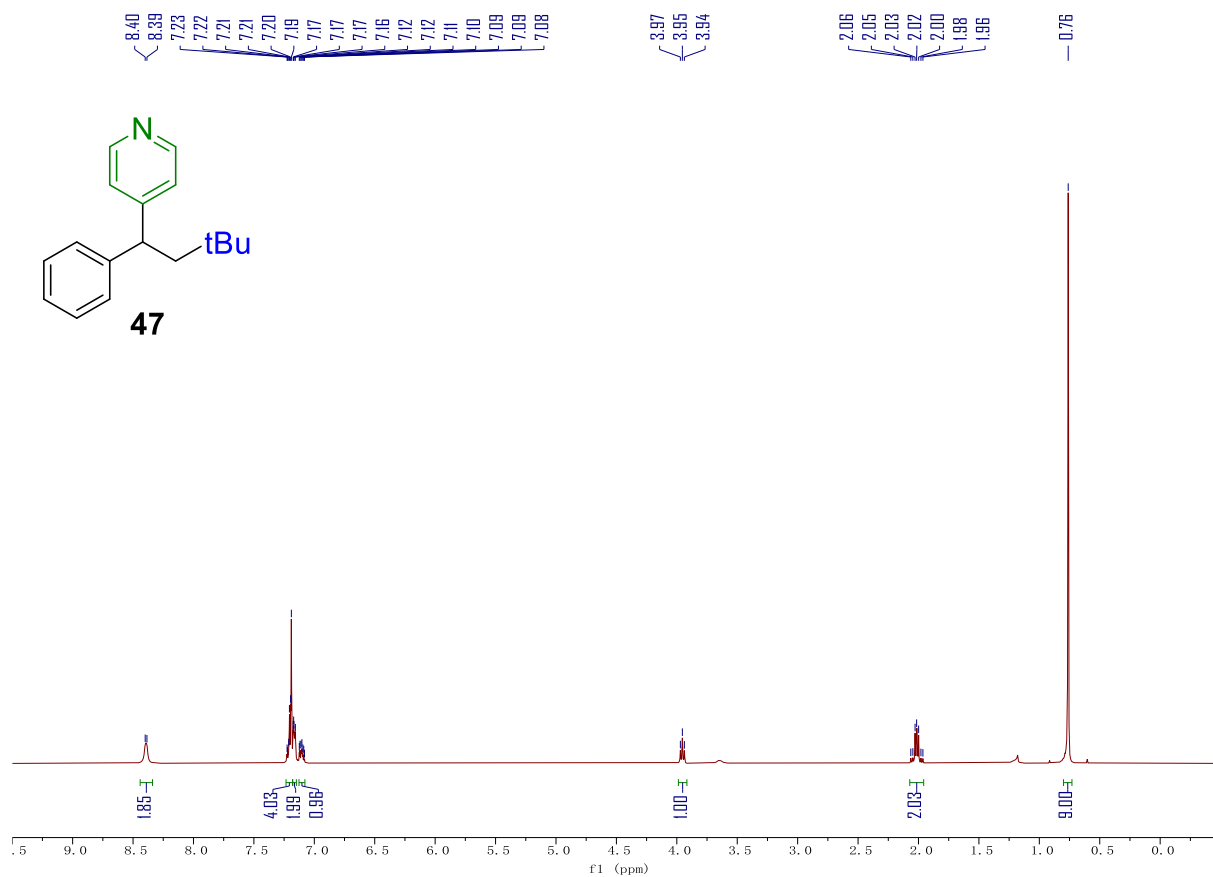

**$^{13}\text{C}$  NMR spectra of compound **47** (101 MHz, Chloroform-*d*)**

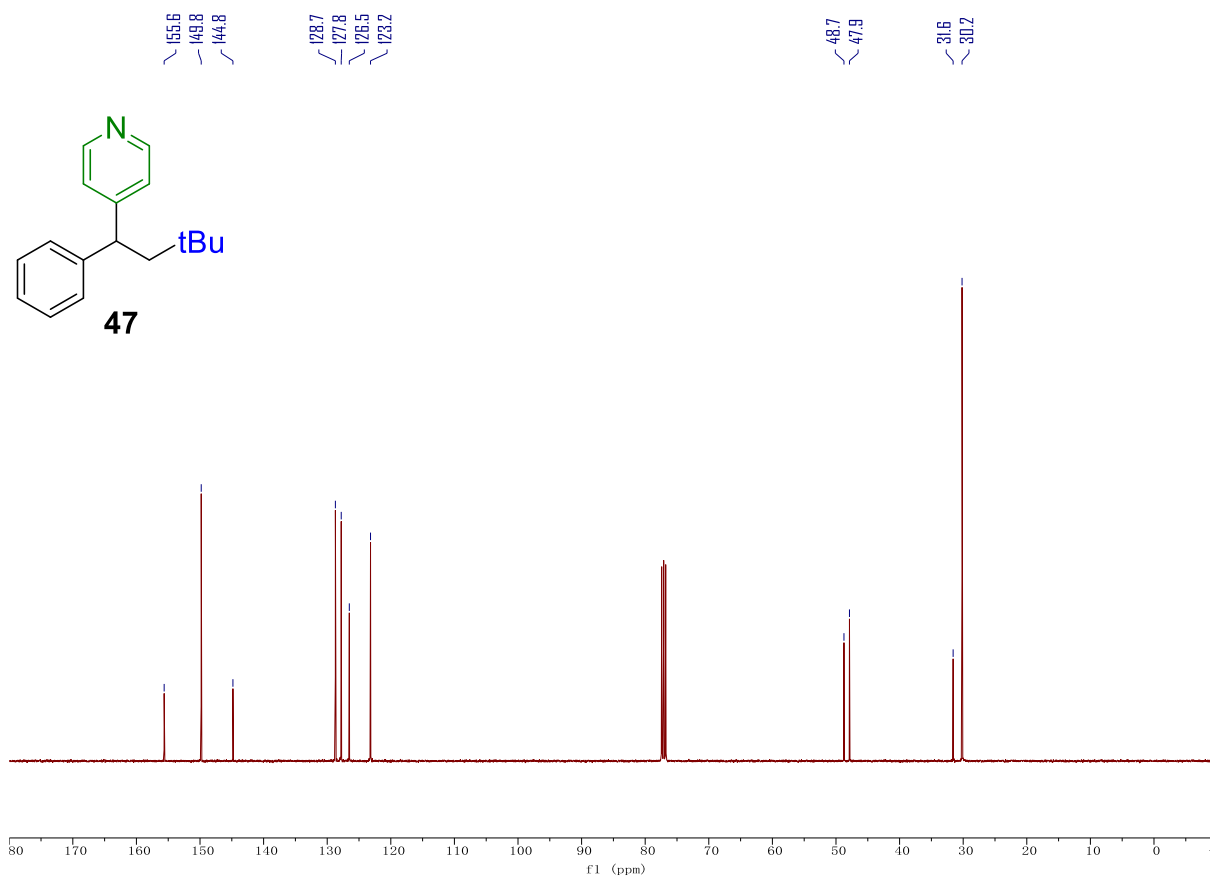

**$^1\text{H}$  NMR spectra of compound **48** (400 MHz, Chloroform-*d*)**

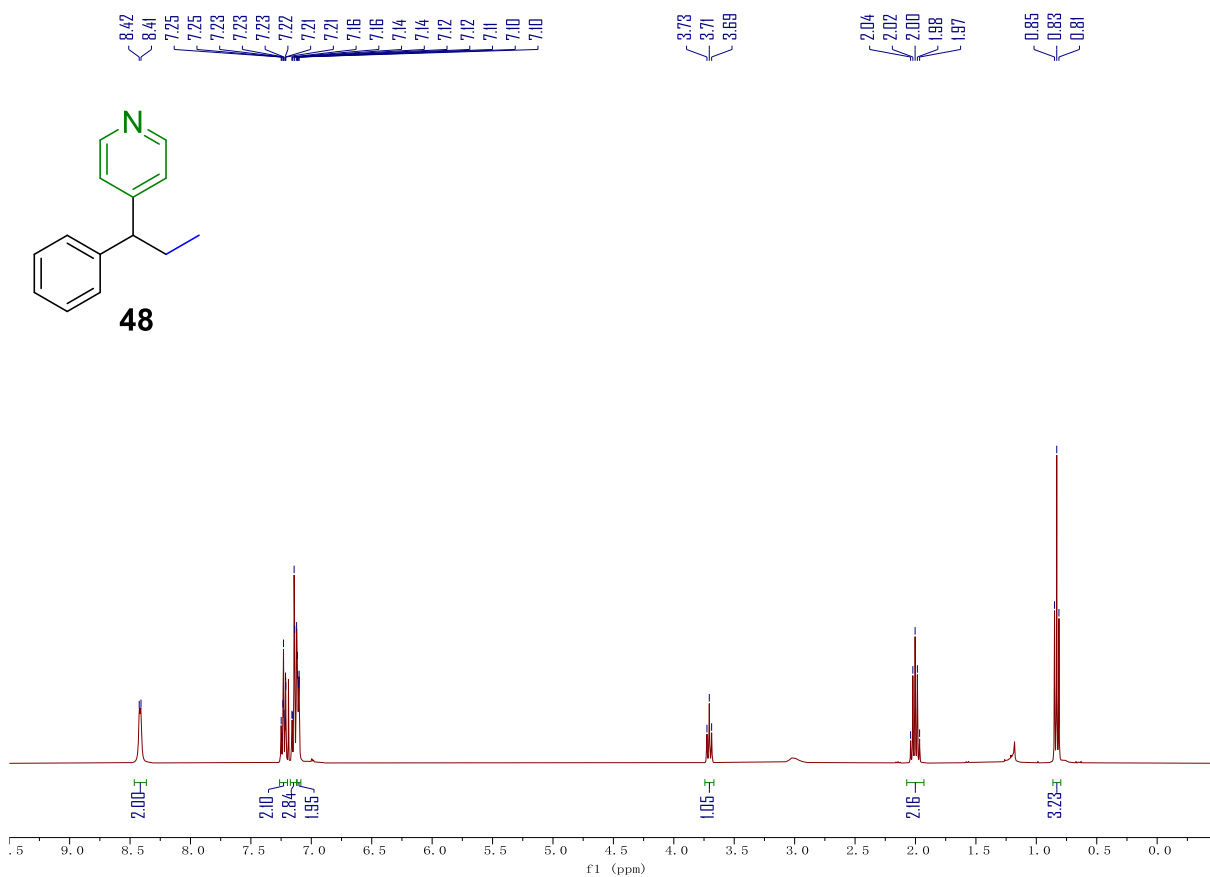

**$^{13}\text{C}$  NMR spectra of compound **48** (101 MHz, Chloroform-*d*)**

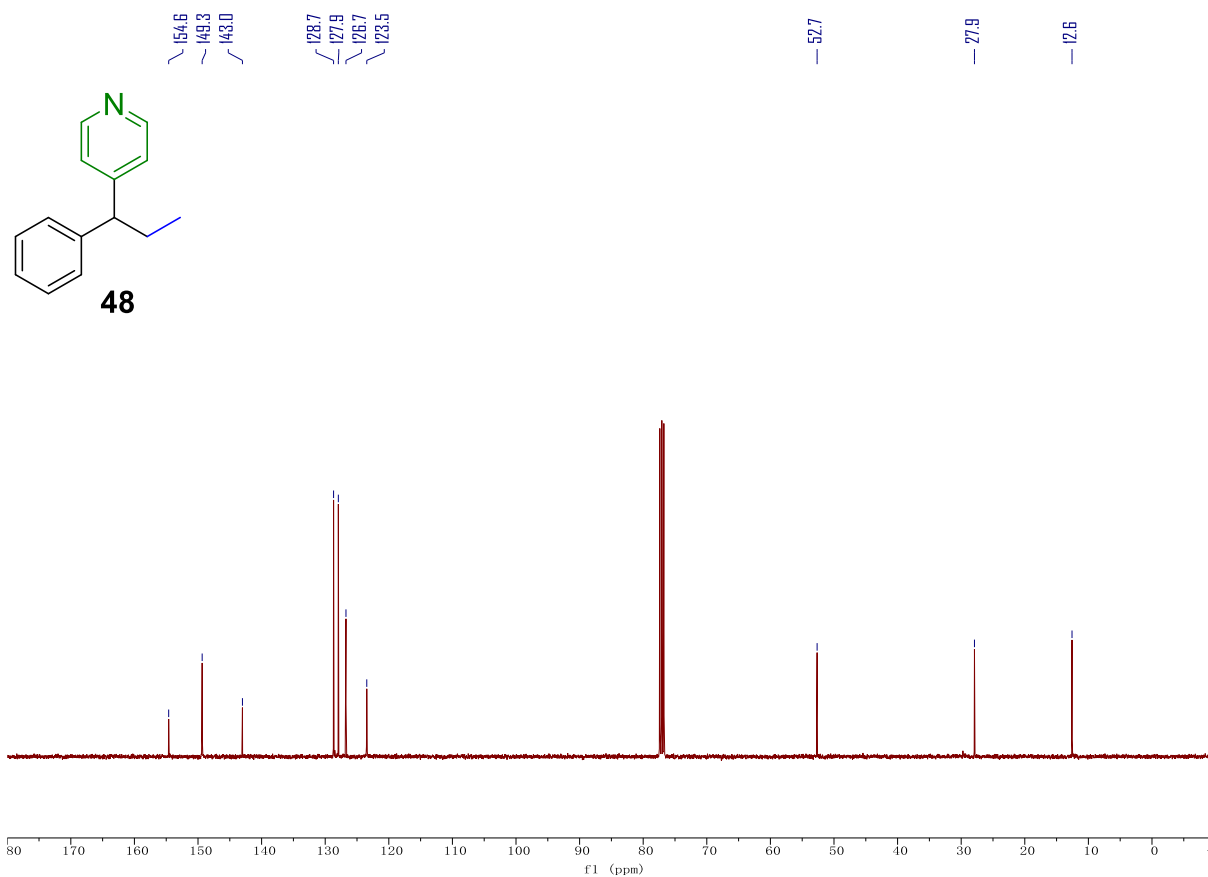

**$^1\text{H}$  NMR spectra of compound **49** (400 MHz, Chloroform-*d*)**

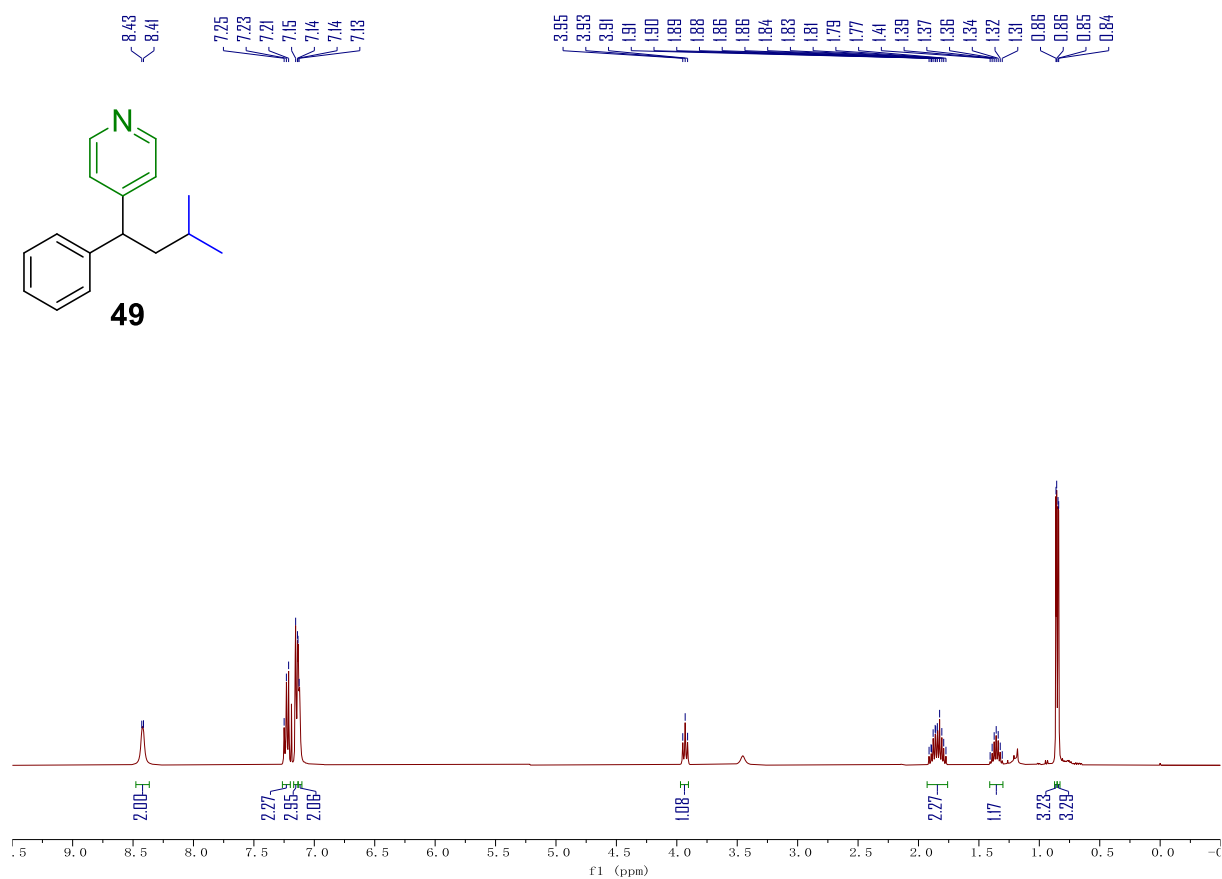

**$^{13}\text{C}$  NMR spectra of compound **49** (101 MHz, Chloroform-*d*)**

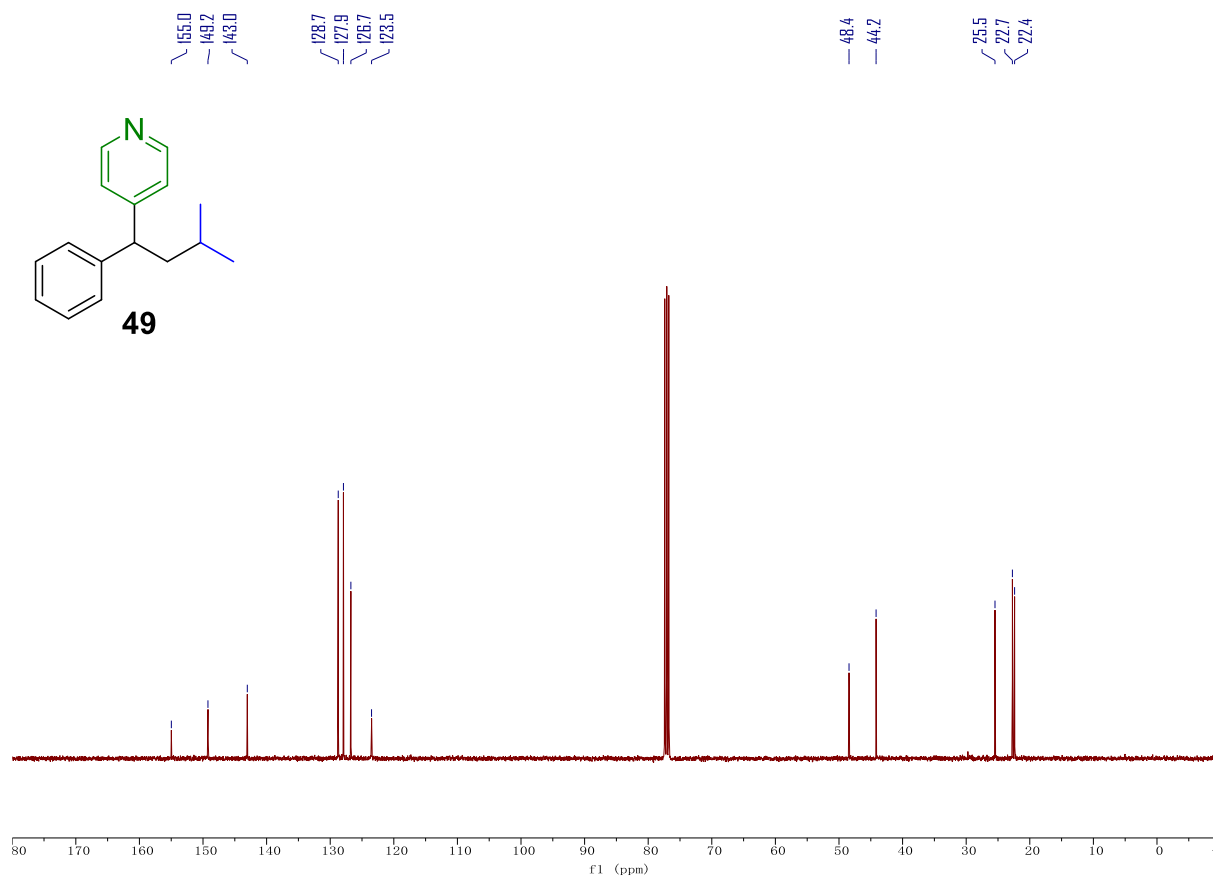

**$^1\text{H}$  NMR spectra of compound **50** (400 MHz, Chloroform-*d*)**

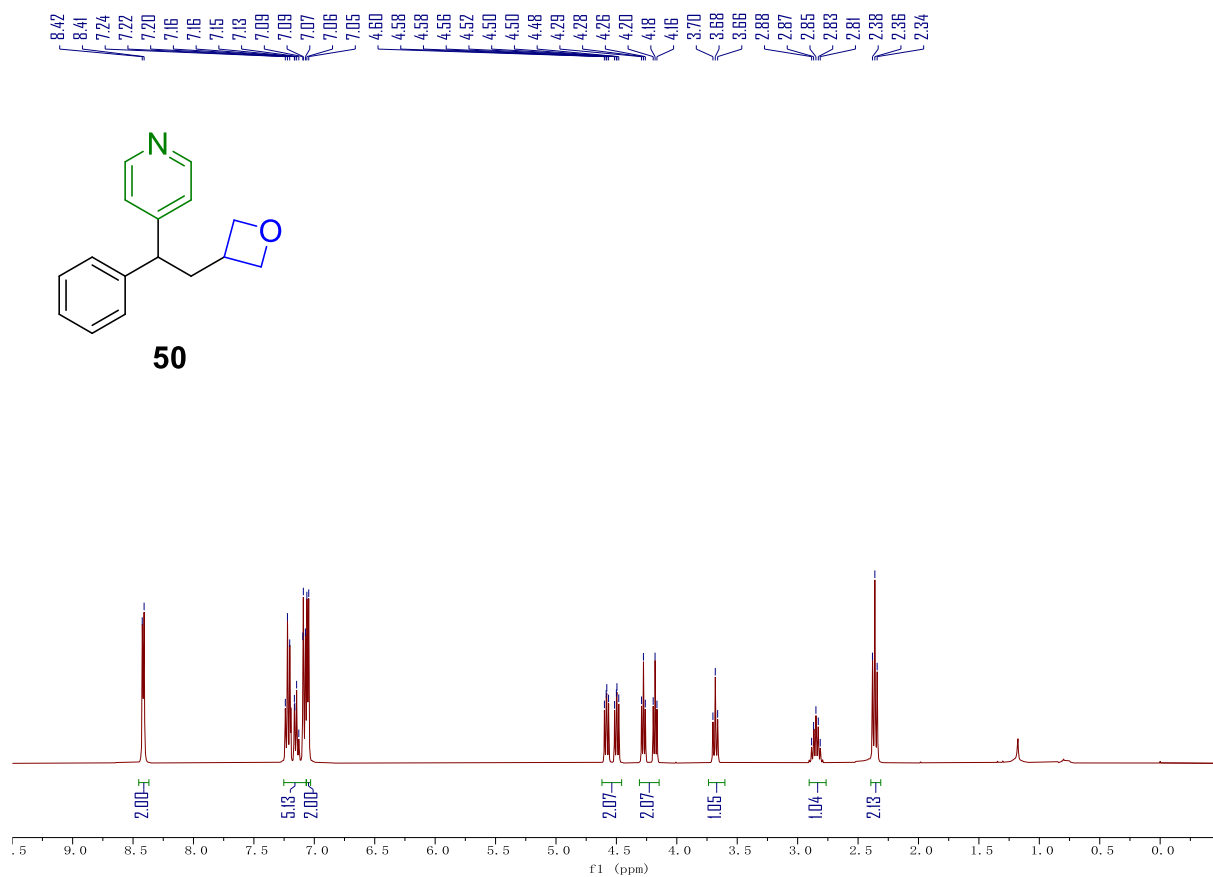

**$^{13}\text{C}$  NMR spectra of compound **50** (101 MHz, Chloroform-*d*)**

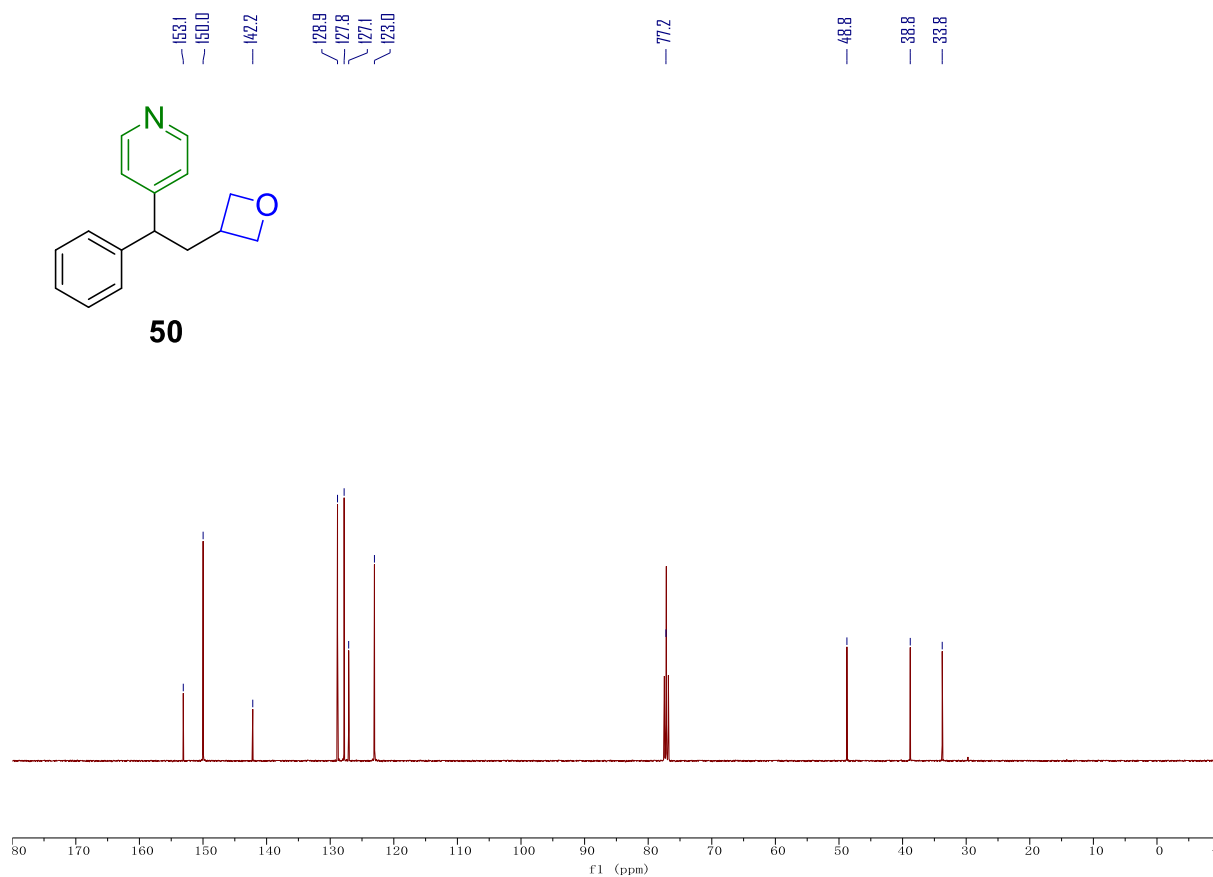

**$^1\text{H}$  NMR spectra of compound **51** (400 MHz, Chloroform-*d*)**

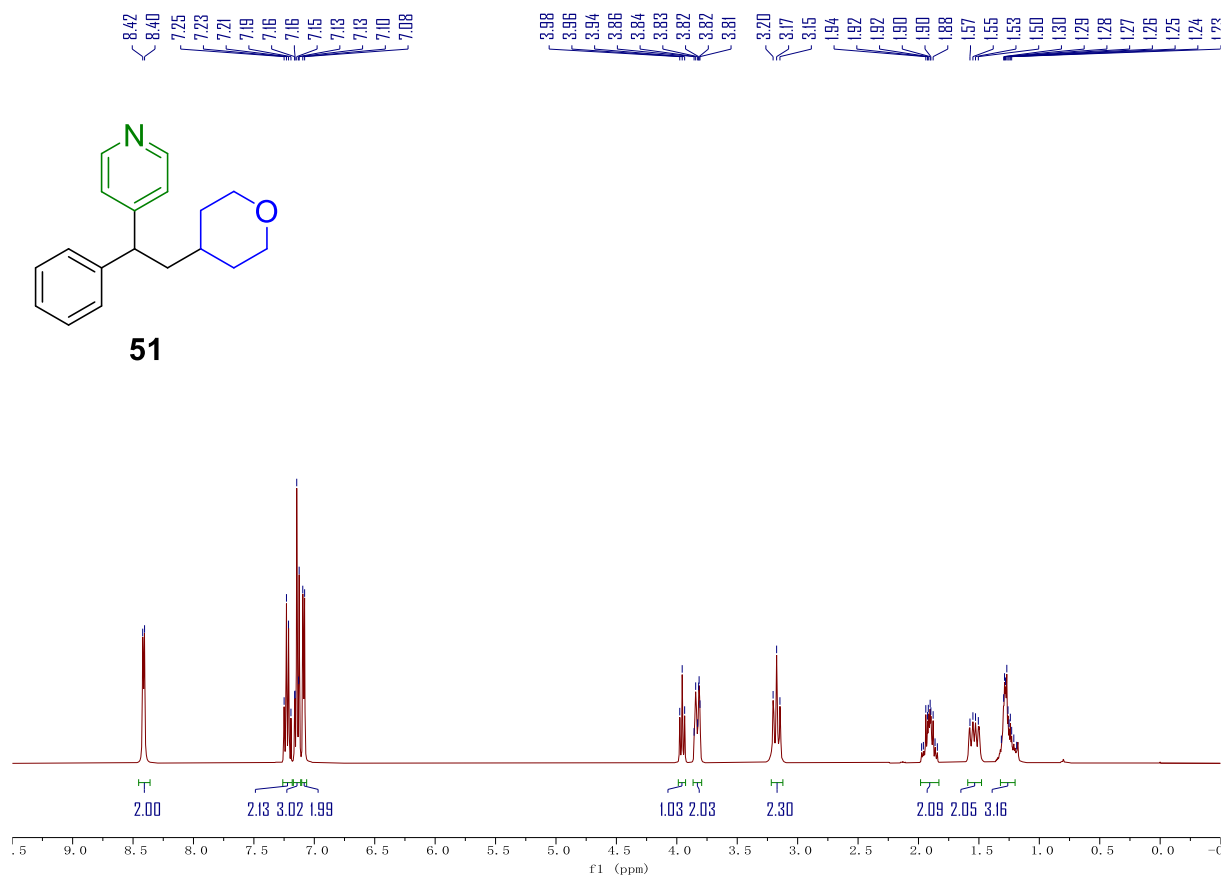

**$^{13}\text{C}$  NMR spectra of compound **51** (101 MHz, Chloroform-*d*)**

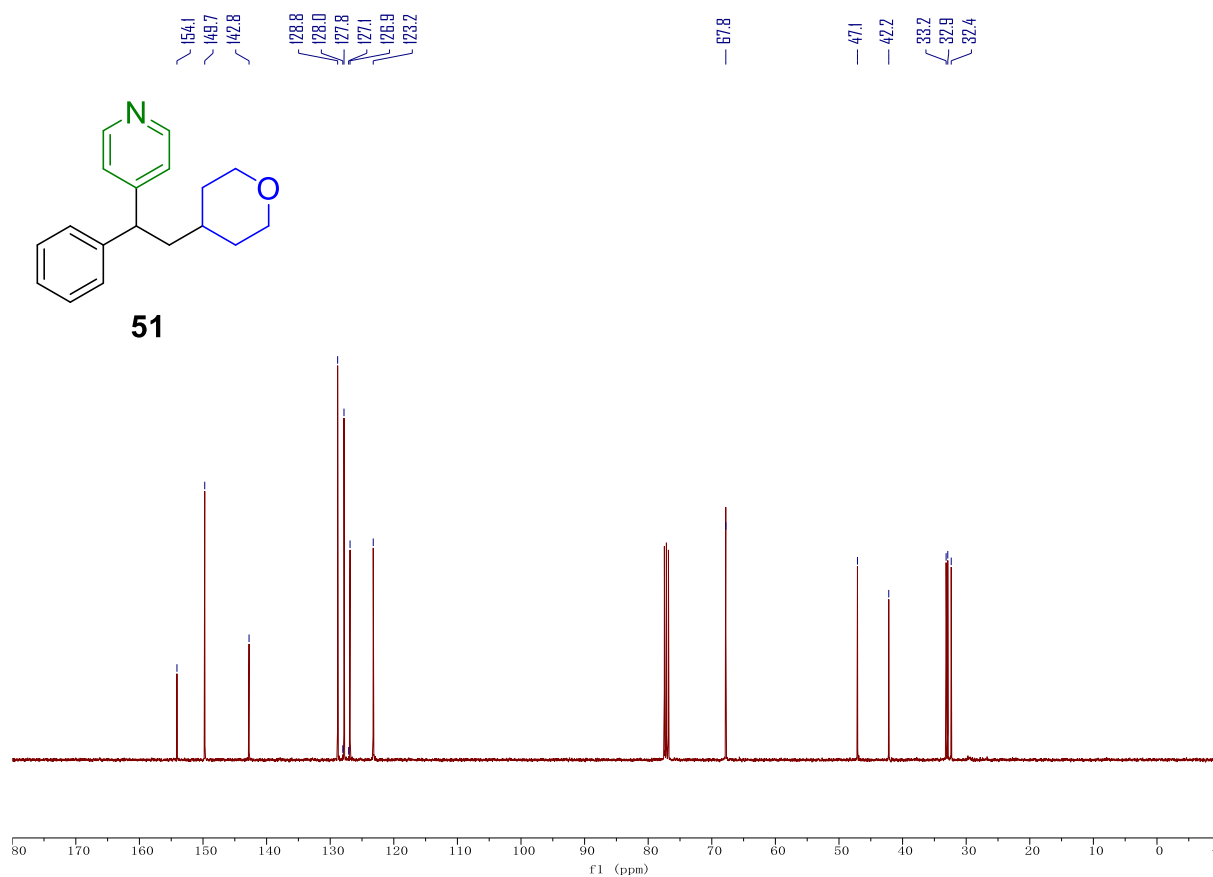

**$^1\text{H}$  NMR spectra of compound **52** (400 MHz, Chloroform-*d*)**

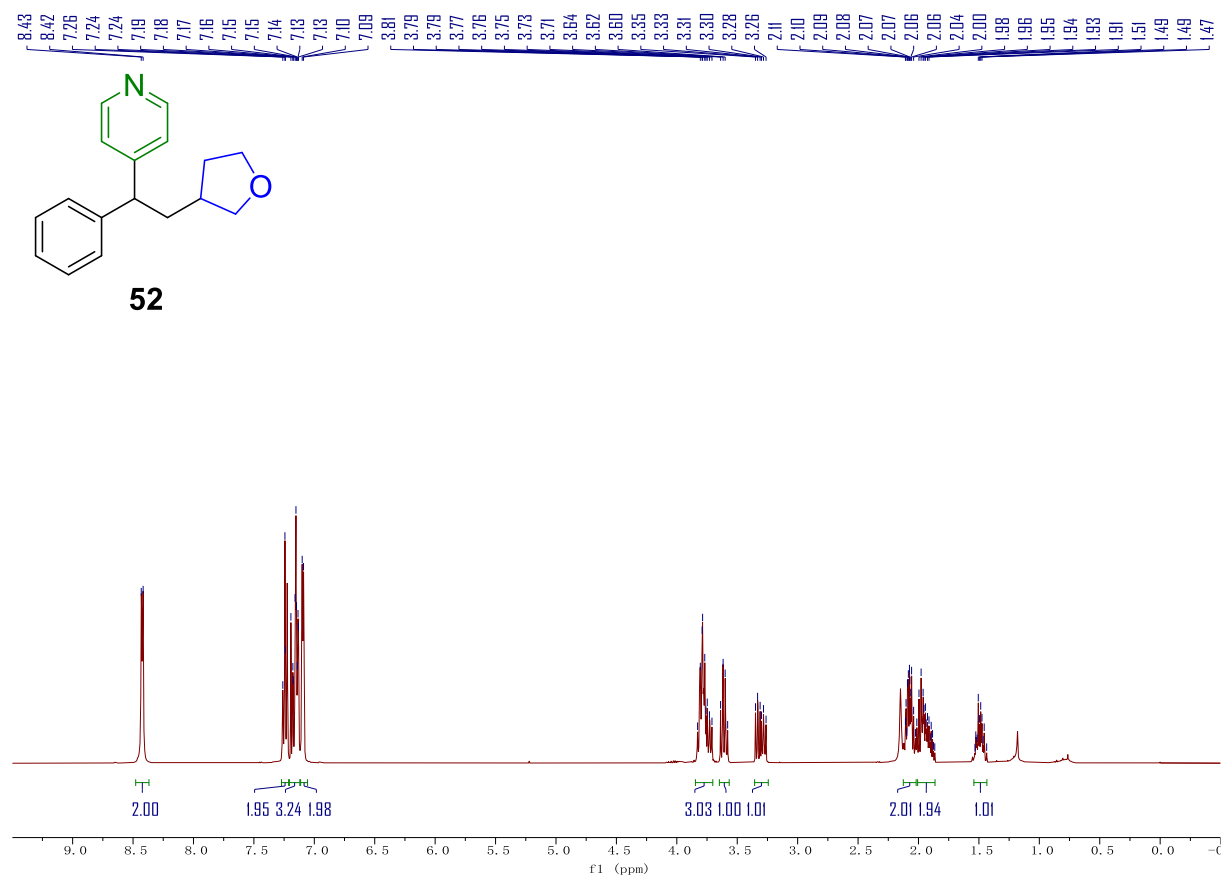



**<sup>13</sup>C NMR spectra of compound **52** (101 MHz, Chloroform-*d*)**

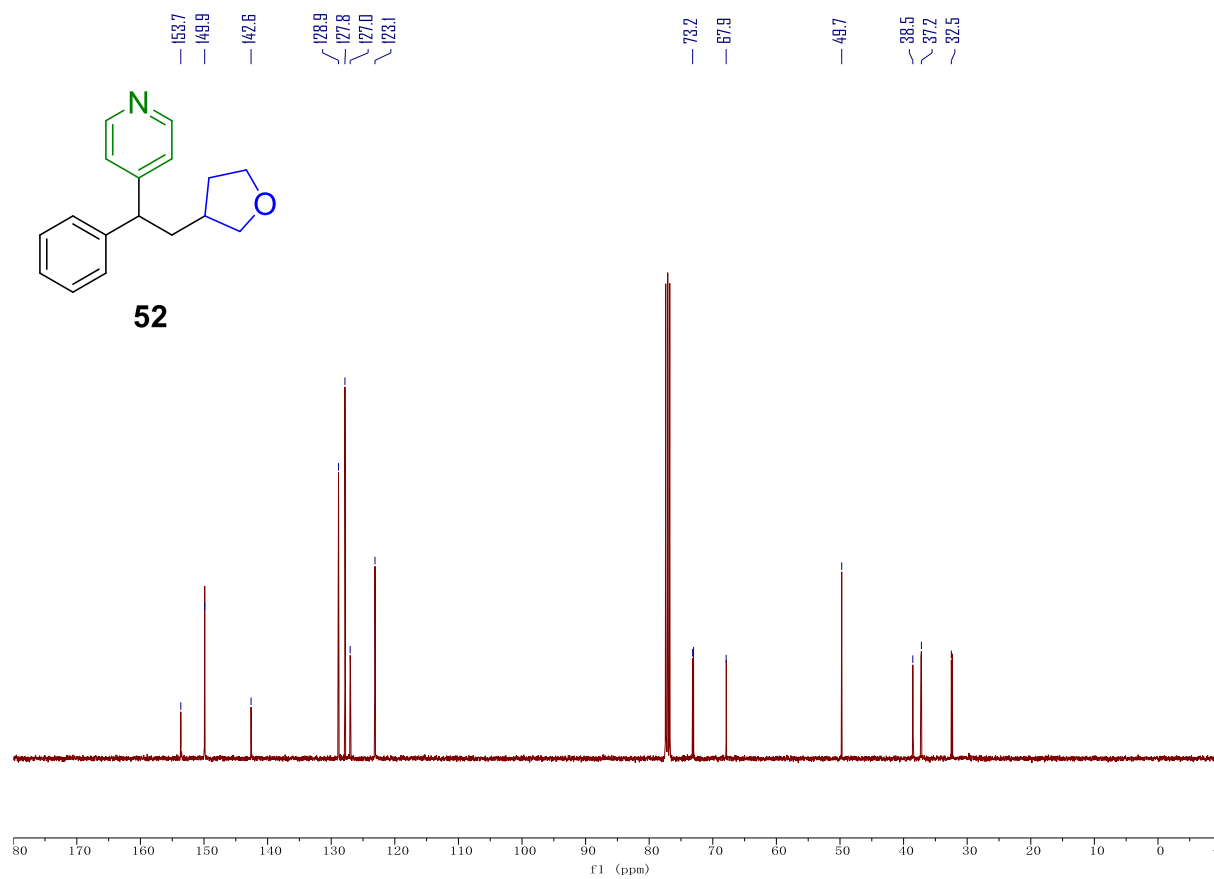

## 12. Reference

- [1] J. Xu and B Liu, Metal Free Functionalization of Saturated Heterocycles with Vinylarenes and Pyridine Enabled by Photocatalytic Hydrogen Atom Transfer, *Chem. Eur. J.*, 2024, **30**, e202400612.
- [2] D. D. Tang, Y.-Z. Wang, C. Liu, Y. Xia and Y. Li, Photoredox-Catalyzed Amino-Radical-Transfer Mediated Three-Component Alkylarylation of Alkenes, *Org. Lett.*, 2024, **26**, 6477–6481.
